# Supplementary material for: Endocrine islet β-cell subtypes with differential function are derived from biochemically distinct embryonic endocrine islet progenitors that are regulated by maternal nutrients
Source: Research Square preprint supplement (doi:10.21203/rs.3.rs-3946483/v1), 2024-03-07
Supplement: Supplementary file 1 [file 5bb126bfc6211a221e253d7e.xlsx]

## Sheet: Table S1
Number of tdT+ or tdT- cells identified from scRNA-seq
P2
Sample 1 (3)		Sample 2(4)		Sample 3 (4)		Sample 4 (3)
tdT+	tdT-	tdT+	tdT-	tdT+	tdT-	tdT+	tdT-
123	280	503	1103	193	325	456	475
P60
Male sample 1 (3)		Male sample 2(4)		Male sample 3 (3)		Female sample 1 (4)		Female sample 2(3)		Female sample 3 (3)
tdT+	tdT-	tdT+	tdT-	tdT+	tdT-	tdT+	tdT-	tdT+	tdT-	tdT+	tdT-
467	431	363	359	468	442	384	291	858	570	418	301

## Sheet: Table S2
Genes	S1-tdT+	S2-tdT+	S3-tdT+	S4-tdT+	S1-tdT-	S2-tdT-	S3-tdT-	S4-tdT-	posAvg	negAvg	Diff	P_Value	Down or Up in tdT+ cells	Lower-methylation in eYFP+ cells?	higher-methylation in eYFP+ cells?
Atp5g3	0.330341	0.351247	0.307604	0.28323	0.347217	0.396071	0.368697	0.337169	0.318106	0.362289	-0.0441831	0.019788	Down	Yes	Yes
Dlgap1	0.553748	0.15814	0.364761	0.257175	0.605717	0.196411	0.422599	0.273712	0.333456	0.37461	-0.0411535	0.020655	Down	Yes	Yes
Gpc6	0.0290653	0.0281826	0.0173528	0.0162583	0.0367465	0.0384683	0.028456	0.0277188	0.0227147	0.0328474	-0.0101327	0.001284	Down	Yes	Yes
Ext2	0.0484527	0.0356893	0.0460686	0.0465592	0.0569236	0.0469529	0.0544329	0.0507277	0.0441924	0.0522593	-0.00806683	0.011735	Down	Yes	Yes
Phlpp1	0.0445008	0.0211953	0.0650133	0.0534174	0.0505826	0.0337173	0.0742957	0.0551319	0.0460317	0.0534319	-0.00740017	0.049009	Down	Yes	Yes
Hddc2	0.00783534	0.0132164	0.0123912	0.0130192	0.0193031	0.0210284	0.0177387	0.0154877	0.0116155	0.0183895	-0.00677396	0.03807	Down	Yes	Yes
Dysf	0.00141263	0.0188183	0.00621596	0.00306821	0.0031503	0.0235105	0.0128587	0.00927608	0.00737878	0.0121989	-0.00482011	0.022512	Down	Yes	Yes
Cdc42ep3	0.00740324	0.0156522	0.00335538	0.0105465	0.0089148	0.019601	0.00946944	0.0168181	0.00923933	0.0137008	-0.00446151	0.028103	Down	Yes	Yes
Max	0.0555308	0.0552912	0.0513397	0.0577191	0.0611452	0.0608925	0.0521463	0.062317	0.0549702	0.0591252	-0.00415504	0.035738	Down	Yes	Yes
Adnp2	0.0042834	0.010838	0.00964254	0.00951578	0.00905825	0.0143891	0.0109775	0.0126407	0.00856992	0.0117664	-0.00319647	0.020661	Down	Yes	Yes
Oma1	0.01278	0.012034	0.0136594	0.0144264	0.0150918	0.0149019	0.0171615	0.0176333	0.0132249	0.0161971	-0.00297219	0.001362	Down	Yes	Yes
Prdm2	0.00252275	0.00103411	0.00646066	0.00284061	0.00422744	0.00276341	0.00742998	0.00357026	0.00321453	0.00449777	-0.00128324	0.015175	Down	Yes	Yes
Lypd1	0.00179852	0.000409283	0.00196137	0.00263991	0.000907247	0.000180404	0.000937851	0.00211435	0.00170227	0.00103496	0.000667306	0.034113	Up	Yes	Yes
Zmat4	0.00694397	0.00480313	0.00610106	0.00377781	0.00634964	0.00315679	0.00530134	0.00259316	0.00540649	0.00435023	0.00105626	0.019767	Up	Yes	Yes
Skint5	0.00598976	0.00491735	0.00376425	0.00332322	0.00487225	0.00262651	0.00303628	0.00201436	0.00449864	0.00313735	0.00136129	0.026321	Up	Yes	Yes
Cfap77	0.00523364	0.00302974	0.00729945	0.00893314	0.00253905	0.00222136	0.00421022	0.00768006	0.00612399	0.00416267	0.00196132	0.037774	Up	Yes	Yes
Tlr2	0.00739165	0.00745615	0.0077254	0.0102915	0.00467271	0.00506413	0.00687827	0.00568902	0.00821617	0.00557603	0.00264014	0.041708	Up	Yes	Yes
Sulf2	0.0147071	0.0229312	0.0229302	0.0236717	0.0109015	0.0203419	0.0216839	0.0198306	0.02106	0.0181895	0.00287055	0.018548	Up	Yes	Yes
Neurog3	0.00459538	0.00482311	0.00298467	0.00553813	0.00188406	0.00156684	0.000365679	0.0020396	0.00448532	0.00146404	0.00302128	0.000751	Up	Yes	Yes
Anapc7	0.0202298	0.0227048	0.0215402	0.025716	0.0131056	0.0209792	0.0169568	0.0193377	0.0225477	0.0175948	0.00495287	0.025824	Up	Yes	Yes
Ccdc148	0.0248049	0.0175546	0.0329102	0.0256095	0.0196232	0.0147924	0.0260073	0.0187812	0.0252198	0.019801	0.0054188	0.011338	Up	Yes	Yes
Bcas3	0.0802098	0.0477652	0.0441722	0.0487809	0.0680564	0.0408219	0.0393132	0.0423316	0.055232	0.0476308	0.00760125	0.017142	Up	Yes	Yes
Creb3l1	0.035318	0.0307881	0.0268733	0.0378235	0.0235777	0.0251218	0.0211357	0.0282725	0.0327008	0.0245269	0.00817383	0.012041	Up	Yes	Yes
Add3	0.0508082	0.0546542	0.0708253	0.0683279	0.0428844	0.0469003	0.0535667	0.0610732	0.0611539	0.0511061	0.0100478	0.025051	Up	Yes	Yes
Asph	0.0445895	0.0404146	0.0448263	0.0410381	0.0270849	0.0367323	0.0348156	0.0299927	0.0427171	0.0321564	0.0105607	0.033516	Up	Yes	Yes
Ssbp3	0.162387	0.130915	0.155195	0.151388	0.141551	0.120865	0.14137	0.14608	0.149971	0.137466	0.0125047	0.031695	Up	Yes	Yes
Cul1	0.0960457	0.0923832	0.094362	0.0984825	0.0764337	0.0809386	0.0873812	0.0778967	0.0953184	0.0806625	0.0146558	0.02085	Up	Yes	Yes
Slc9a9	0.0574067	0.0346002	0.0564993	0.0460164	0.0338043	0.0212267	0.0368398	0.0403683	0.0486306	0.0330598	0.0155709	0.028551	Up	Yes	Yes
Rbbp6	0.155447	0.157119	0.121819	0.144703	0.148805	0.138527	0.1055	0.118868	0.144772	0.127925	0.0168471	0.023819	Up	Yes	Yes
Dlg1	0.113416	0.0925509	0.144172	0.113688	0.0983109	0.0701614	0.113825	0.0977991	0.115957	0.0950241	0.0209327	0.00964	Up	Yes	Yes
Ptprz1	0.060449	0.0385453	0.0191921	0.0564558	0.0294668	0.0239881	0.0113453	0.0257861	0.0436606	0.0226466	0.021014	0.036623	Up	Yes	Yes
Fbxl17	0.221946	0.133026	0.218598	0.205053	0.209651	0.108737	0.198061	0.174197	0.194656	0.172662	0.0219943	0.010819	Up	Yes	Yes
Ncam1	0.183947	0.127401	0.176463	0.179371	0.148069	0.104764	0.147647	0.143269	0.166795	0.135937	0.0308579	0.002412	Up	Yes	Yes
Ank3	0.266891	0.183623	0.239807	0.264283	0.221861	0.157324	0.213378	0.231758	0.238651	0.20608	0.0325705	0.005099	Up	Yes	Yes
Tnrc6a	0.260433	0.170672	0.193752	0.231568	0.21197	0.153594	0.163464	0.193488	0.214106	0.180629	0.0334772	0.014881	Up	Yes	Yes
Dnmt3a	0.411026	0.28768	0.429892	0.416725	0.381985	0.247274	0.414597	0.362494	0.386331	0.351587	0.0347432	0.024689	Up	Yes	Yes
Cacna1a	0.381027	0.179512	0.379112	0.294642	0.332823	0.174312	0.339004	0.240308	0.308573	0.271612	0.0369616	0.043537	Up	Yes	Yes
Irs2	0.269798	0.192862	0.31159	0.303999	0.22887	0.158914	0.273782	0.266281	0.269562	0.231961	0.0376009	0.00012	Up	Yes	Yes
Lyrm4	0.347999	0.323189	0.340695	0.324416	0.292948	0.286909	0.305042	0.284204	0.334074	0.292276	0.0417984	0.002695	Up	Yes	Yes
Itpr1	0.149631	0.119183	0.13305	0.141423	0.0898366	0.0998731	0.0928382	0.0932915	0.135822	0.0939599	0.0418617	0.016174	Up	Yes	Yes
Zbtb20	0.511936	0.341253	0.40161	0.415396	0.447107	0.296455	0.350527	0.37954	0.417549	0.368407	0.0491415	0.003979	Up	Yes	Yes
Cadps	0.420749	0.255271	0.443272	0.388132	0.390814	0.212629	0.380617	0.319646	0.376856	0.325927	0.0509294	0.010663	Up	Yes	Yes
Syt16	0.57443	0.327074	0.396957	0.335937	0.539814	0.249011	0.320873	0.268375	0.408599	0.344518	0.0640809	0.007881	Up	Yes	Yes
Syt7	0.495342	0.377412	0.420331	0.500417	0.469988	0.318598	0.365488	0.379511	0.448376	0.383396	0.0649795	0.047999	Up	Yes	Yes
Btg2	0.506535	0.500753	0.441652	0.710881	0.473275	0.386188	0.363567	0.641095	0.539956	0.466031	0.0739244	0.021355	Up	Yes	Yes
Meis2	0.839302	0.516425	0.765935	0.744209	0.716082	0.426897	0.708327	0.669852	0.716468	0.630289	0.0861785	0.008561	Up	Yes	Yes
Tjp1	1.01542	1.08224	0.777836	0.780845	1.14	1.16343	0.828841	0.897943	0.914084	1.00755	-0.0934696	0.011899	Down	No	Yes
Esd	0.0863449	0.104588	0.0895214	0.0817655	0.10883	0.120063	0.104688	0.107747	0.0905549	0.110332	-0.0197773	0.005093	Down	No	Yes
Fam168a	0.0656626	0.0520117	0.074589	0.0614977	0.0858339	0.0630467	0.0838299	0.0821825	0.0634403	0.0787232	-0.015283	0.014553	Down	No	Yes
Thoc2	0.0757953	0.0413983	0.0803003	0.0602593	0.0905736	0.0495542	0.0898138	0.0816788	0.0644383	0.0779051	-0.0134668	0.020831	Down	No	Yes
C1qbp	0.0351479	0.045431	0.0238319	0.0263511	0.0440342	0.0599264	0.0373522	0.0430567	0.0326905	0.0460924	-0.0134019	0.003875	Down	No	Yes
Nap1l1	0.186633	0.176894	0.179513	0.167762	0.204666	0.18513	0.187812	0.177276	0.177701	0.188721	-0.0110203	0.018456	Down	No	Yes
Anp32a	0.0988728	0.098297	0.0854282	0.0965534	0.11061	0.104151	0.0942126	0.1106	0.0947878	0.104893	-0.0101056	0.010826	Down	No	Yes
Neu1	0.0555693	0.0441617	0.0361724	0.0384921	0.069984	0.0538398	0.0439891	0.0416319	0.0435989	0.0523612	-0.00876229	0.03297	Down	No	Yes
Rpp25l	0.0177259	0.0191522	0.0174624	0.0222228	0.0222897	0.0240702	0.027586	0.0370678	0.0191408	0.0277534	-0.00861258	0.038456	Down	No	Yes
Arl5a	0.036189	0.0508017	0.0424171	0.0515882	0.0456336	0.0607656	0.0479103	0.0609267	0.045249	0.0538091	-0.00856004	0.003666	Down	No	Yes
Tmco1	0.0593265	0.0663859	0.0674309	0.0627762	0.0657797	0.0701109	0.0770014	0.0736565	0.0639799	0.0716371	-0.00765724	0.017528	Down	No	Yes
2810428I15Rik	0.029487	0.0243598	0.0370338	0.027913	0.0425524	0.0322641	0.0408322	0.0335778	0.0296984	0.0373066	-0.0076082	0.032053	Down	No	Yes
Mib1	0.0737252	0.0508821	0.0793401	0.0781383	0.0781777	0.0622218	0.0885834	0.0818545	0.0705214	0.0777094	-0.00718792	0.030144	Down	No	Yes
Sdhb	0.0771751	0.0724024	0.0587735	0.0608375	0.0831553	0.0802881	0.0649117	0.0682067	0.0672971	0.0741405	-0.00684334	0.000685	Down	No	Yes
Dclk1	0.0337957	0.0270544	0.0380386	0.0340892	0.0433627	0.0357714	0.0434661	0.036679	0.0332445	0.0398198	-0.00657535	0.026111	Down	No	Yes
Bcl6	0.0180307	0.0101441	0.0161425	0.0178964	0.0225571	0.0203267	0.0205738	0.0227481	0.0155534	0.0215514	-0.00599802	0.023267	Down	No	Yes
Rgs3	0.0221437	0.0124459	0.0368678	0.0316307	0.0275314	0.0214251	0.0391049	0.0376664	0.025772	0.0314319	-0.0056599	0.026376	Down	No	Yes
Fam83d	0.000256346	0.000972523	0.0101476	0.00682527	0.00132008	0.00991041	0.0162996	0.0130458	0.00455043	0.010144	-0.00559356	0.042335	Down	No	Yes
Neurl1b	0.00606609	0.0151811	0.0277126	0.0264681	0.00873188	0.0197807	0.0324252	0.0354574	0.018857	0.0240988	-0.00524184	0.029368	Down	No	Yes
Aph1b	0.00566218	0.0073021	0.0114123	0.0103568	0.00911033	0.0124156	0.018565	0.0154691	0.00868336	0.01389	-0.00520664	0.006323	Down	No	Yes
4930523C07Rik	0.00219072	0.00333076	0.00626755	0.0100809	0.00528316	0.0084689	0.00917964	0.0190507	0.00546748	0.0104956	-0.00502813	0.0375	Down	No	Yes
Dhx36	0.0433064	0.0375264	0.0435194	0.0348315	0.050205	0.0398988	0.0501994	0.0374299	0.0397959	0.0444333	-0.00463733	0.033631	Down	No	Yes
Enox2	0.0342262	0.0225333	0.0325185	0.0288176	0.036597	0.0260531	0.0374355	0.0365092	0.0295239	0.0341487	-0.00462477	0.027431	Down	No	Yes
Bcl2l1	0.0409085	0.0451464	0.0223249	0.0402056	0.0450575	0.0469305	0.0307397	0.0437609	0.0371464	0.0416221	-0.00447579	0.049935	Down	No	Yes
Sdc2	0.0211351	0.0288491	0.0107939	0.0159453	0.0278341	0.0314408	0.0123429	0.0224023	0.0191808	0.023505	-0.00432417	0.046518	Down	No	Yes
Pwp1	0.0172822	0.0187961	0.02145	0.0181659	0.0203099	0.0245525	0.0233288	0.0246011	0.0189236	0.0231981	-0.00427452	0.029219	Down	No	Yes
Adam12	0.00804786	0.00872884	0.00954572	0.00584216	0.0105457	0.0131326	0.0135643	0.0111162	0.00804115	0.0120897	-0.00404857	0.006027	Down	No	Yes
Gins4	0.0124097	0.0183952	0.0114131	0.0191825	0.0162377	0.0190162	0.0167638	0.0242337	0.0153501	0.0190629	-0.00371273	0.041493	Down	No	Yes
Fbxw8	0.0198839	0.013883	0.0245855	0.0196408	0.0233805	0.0194183	0.0280219	0.0220228	0.0194983	0.0232108	-0.00371253	0.011078	Down	No	Yes
Slc25a28	0.0226061	0.0177392	0.0219047	0.0183391	0.025765	0.0224677	0.0247485	0.0218387	0.0201473	0.023705	-0.00355769	0.003285	Down	No	Yes
Pde8b	0.00388599	0.00978658	0.0101208	0.00927355	0.00818319	0.0121493	0.0117119	0.0150431	0.00826673	0.0117719	-0.00350515	0.034098	Down	No	Yes
Bod1l	0.0144216	0.00399306	0.0188365	0.0136467	0.0175416	0.00860285	0.0221256	0.0144536	0.0127245	0.0156809	-0.00295645	0.0333	Down	No	Yes
Arhgap8	0.0129295	0.0090503	0.00850282	0.0126462	0.0154132	0.0131061	0.0108683	0.0148767	0.0107822	0.0135661	-0.00278388	0.007342	Down	No	Yes
Bend3	0.00487186	0.0085806	0.00411476	0.0085006	0.0072688	0.0115035	0.00837389	0.00950467	0.00651695	0.00916271	-0.00264576	0.029316	Down	No	Yes
Tmem45b	0.00516305	0.00641042	0.00202375	0.00170016	0.00592273	0.0106108	0.00448854	0.00445365	0.00382434	0.00636892	-0.00254458	0.036617	Down	No	Yes
Camsap2	0.0355764	0.0338562	0.0335622	0.0332634	0.0384678	0.0381317	0.0341191	0.0355277	0.0340645	0.0365616	-0.00249703	0.047918	Down	No	Yes
Tbc1d12	0.0298686	0.0343815	0.0363135	0.03505	0.0330962	0.035696	0.038114	0.0381768	0.0339034	0.0362707	-0.00236733	0.015837	Down	No	Yes
Maats1	0.00683126	0.00900884	0.0152641	0.00517094	0.01022	0.010553	0.018139	0.00670792	0.0090688	0.0114049	-0.00233615	0.015757	Down	No	Yes
Rgmb	0.00858376	0.0124006	0.00778739	0.00831018	0.0093521	0.0151743	0.00961112	0.0117593	0.00927049	0.0114742	-0.0022037	0.032469	Down	No	Yes
Mospd1	0	0.00203795	0	0.00348736	0.00342841	0.00478916	0.00187196	0.00401517	0.00138133	0.00352618	-0.00214485	0.041656	Down	No	Yes
Map7d1	0.0267647	0.043683	0.0336267	0.0327881	0.028847	0.0471407	0.0357366	0.0334765	0.0342156	0.0363002	-0.0020846	0.034608	Down	No	Yes
Abcd2	0.000676163	0.000107434	0.000770319	0.000313197	0.00124805	0.00296973	0.0021765	0.00283423	0.000466778	0.00230713	-0.00184035	0.039303	Down	No	Yes
Bcl2l14	0	0.00160988	0.00101991	0.00132125	0.00100973	0.00404058	0.00388682	0.00208544	0.00098776	0.00275564	-0.00176788	0.042219	Down	No	Yes
Per1	0.027287	0.0297806	0.0158866	0.0262419	0.0278839	0.0307371	0.0182738	0.0288361	0.024799	0.0264327	-0.00163369	0.047339	Down	No	Yes
Morc4	0.00416082	0.00480144	0.00521046	0.005483	0.00477698	0.00678151	0.00601833	0.007471	0.00491393	0.00626196	-0.00134803	0.035503	Down	No	Yes
Acsbg2	0.00325175	0.00030352	0.00223946	0.000688999	0.00287707	0.000192211	0.00159666	0.000332863	0.00162093	0.0012497	0.000371232	0.041605	Up	No	Yes
Nagpa	0.00478093	0.00335513	0.00303856	0.00411073	0.00353253	0.00302767	0.00188049	0.00341811	0.00382134	0.0029647	0.000856638	0.028099	Up	No	Yes
Slc35a2	0.0245122	0.0229039	0.0404125	0.0315978	0.0229562	0.0223429	0.0393426	0.029918	0.0298566	0.0286399	0.00121666	0.017536	Up	No	Yes
Bbs10	0.00383075	0.00451059	0.00214755	0.00345778	0.00184189	0.00230259	0.000937804	0.00314912	0.00348667	0.00205785	0.00142882	0.045045	Up	No	Yes
Pitrm1	0.0134929	0.00830967	0.0139755	0.00877758	0.0101337	0.00688879	0.0126098	0.00758057	0.0111389	0.0093032	0.00183571	0.036798	Up	No	Yes
Erich3	0.0153268	0.0131976	0.0151429	0.020071	0.0147892	0.0115046	0.0126241	0.0174587	0.0159346	0.0140941	0.00184046	0.0314	Up	No	Yes
Prickle3	0.00428667	0.00357425	0.00377441	0.00563501	0.00189864	0.00315101	0.00185511	0.00262218	0.00431758	0.00238174	0.00193585	0.039251	Up	No	Yes
Mitf	0.0301564	0.00956902	0.0218004	0.0185646	0.025727	0.00796134	0.01941	0.0145369	0.0200226	0.0169088	0.00311379	0.018644	Up	No	Yes
5730508B09Rik	0.0145179	0.0221982	0.0175418	0.0161021	0.0122461	0.0174174	0.0150193	0.0131092	0.01759	0.014448	0.00314203	0.011544	Up	No	Yes
Tmem25	0.0214816	0.014236	0.00908691	0.01686	0.0190545	0.0111688	0.00577148	0.0116084	0.0154161	0.0119008	0.00351534	0.010305	Up	No	Yes
Ctnnal1	0.0552762	0.0396818	0.0464186	0.0519167	0.0513216	0.0325706	0.0439845	0.0495389	0.0483233	0.0443539	0.0039694	0.037298	Up	No	Yes
5730522E02Rik	0.0269685	0.023239	0.0320319	0.0331028	0.0216748	0.0189884	0.0293203	0.0256904	0.0288355	0.0239185	0.00491708	0.015521	Up	No	Yes
Rfx2	0.0185764	0.0179226	0.0322476	0.0260625	0.0172389	0.0123477	0.0229752	0.020865	0.0237023	0.0183567	0.0053456	0.045873	Up	No	Yes
Nsun6	0.022707	0.018378	0.0193542	0.0192966	0.0172591	0.0126588	0.0151152	0.0129857	0.019934	0.0145047	0.00542929	0.001114	Up	No	Yes
Sgsm2	0.0694569	0.0615345	0.0602111	0.0704514	0.0594421	0.0563732	0.0560731	0.0677802	0.0654135	0.0599171	0.00549632	0.040766	Up	No	Yes
Ccdc60	0.0187809	0.0112319	0.0125015	0.0110381	0.00952804	0.00836905	0.00732688	0.00585694	0.0133881	0.00777023	0.00561787	0.024211	Up	No	Yes
Zfyve21	0.0409381	0.0392738	0.0586077	0.0473122	0.0382987	0.0299133	0.0510543	0.043995	0.0465329	0.0408153	0.00571765	0.039266	Up	No	Yes
Akap17b	0.0257579	0.0265773	0.0215614	0.022319	0.0233275	0.0203497	0.0109406	0.0173263	0.0240539	0.017986	0.00606784	0.038204	Up	No	Yes
Dcun1d4	0.0242164	0.02416	0.0171677	0.0176001	0.0151741	0.0143075	0.0141574	0.0145245	0.0207861	0.0145409	0.00624521	0.04359	Up	No	Yes
Itpr3	0.0739878	0.0558495	0.0421286	0.0452257	0.0646585	0.0497757	0.03252	0.0434246	0.0542979	0.0475947	0.00670318	0.034709	Up	No	Yes
Pkd1	0.0343579	0.0176592	0.0279395	0.0359832	0.0319912	0.0103669	0.0218249	0.0244473	0.0289849	0.0221576	0.00682735	0.036364	Up	No	Yes
Ubqln2	0.106472	0.145609	0.101382	0.0943784	0.0959938	0.140216	0.0914088	0.0923326	0.11196	0.104988	0.00697234	0.039948	Up	No	Yes
Foxk2	0.0770423	0.0652436	0.0801602	0.0713384	0.0728339	0.0600203	0.0715641	0.0598257	0.0734461	0.066061	0.0073851	0.021297	Up	No	Yes
Spock3	0.0221793	0.017398	0.0166604	0.0209459	0.0120157	0.0122837	0.00672911	0.0158775	0.0192959	0.0117265	0.00756937	0.013196	Up	No	Yes
Foxo3	0.0944596	0.0830995	0.0684118	0.0865492	0.0861361	0.0741138	0.0584555	0.0820211	0.08313	0.0751816	0.00794844	0.006819	Up	No	Yes
Klhl22	0.0447903	0.0467756	0.0521029	0.0479903	0.0379805	0.0382132	0.0400116	0.0414071	0.0479148	0.0394031	0.00851169	0.006817	Up	No	Yes
Arrdc4	0.0214311	0.0306661	0.0213335	0.0175435	0.0100224	0.0220407	0.0143529	0.0104333	0.0227435	0.0142123	0.00853123	0.003679	Up	No	Yes
Pknox1	0.0535411	0.053164	0.0817184	0.0741202	0.0437645	0.0412002	0.079154	0.0636882	0.0656359	0.0569517	0.00868417	0.025371	Up	No	Yes
D430042O09Rik	0.039285	0.031694	0.0434088	0.0356084	0.0320091	0.0228212	0.0302319	0.0292253	0.037499	0.0285719	0.00892715	0.009617	Up	No	Yes
B630019K06Rik	0.0628703	0.0600037	0.0446409	0.0420104	0.0530018	0.046225	0.041496	0.0327857	0.0523813	0.0433771	0.0090042	0.02628	Up	No	Yes
Kcnh8	0.0568716	0.0411416	0.0506926	0.0468876	0.0540909	0.0265489	0.0405796	0.0380621	0.0488983	0.0398204	0.00907797	0.033647	Up	No	Yes
Magi2	0.0455788	0.0288977	0.0317693	0.0330156	0.0270365	0.022352	0.025653	0.0252648	0.0348154	0.0250766	0.0097388	0.045879	Up	No	Yes
Qsox2	0.0600464	0.0425684	0.0470383	0.0463558	0.0439214	0.0344292	0.0401607	0.0368849	0.0490022	0.038849	0.0101532	0.016008	Up	No	Yes
Git2	0.0490908	0.0539258	0.0715762	0.0591471	0.0446086	0.0415827	0.0585575	0.0469472	0.058435	0.047924	0.010511	0.013748	Up	No	Yes
Tmem218	0.0324139	0.0244297	0.0363895	0.0361494	0.0164385	0.014782	0.0256155	0.029959	0.0323456	0.0216988	0.0106468	0.013426	Up	No	Yes
Wdr45b	0.0789127	0.0761478	0.0775697	0.088631	0.0673611	0.0550898	0.0672486	0.0802125	0.0803153	0.067478	0.0128373	0.01977	Up	No	Yes
Lrrc8d	0.141758	0.122353	0.13538	0.124176	0.131774	0.114452	0.109698	0.11276	0.130917	0.117171	0.0137459	0.042482	Up	No	Yes
Elp3	0.0800643	0.0734473	0.100647	0.0895217	0.0734252	0.0617401	0.0774684	0.0738498	0.0859201	0.0716209	0.0142993	0.026291	Up	No	Yes
Ell2	0.0482912	0.0442809	0.0688693	0.0559889	0.0311158	0.0361816	0.0498485	0.0413814	0.0543576	0.0396318	0.0147257	0.008574	Up	No	Yes
Nfat5	0.265627	0.196287	0.211272	0.225921	0.248041	0.185832	0.198011	0.205735	0.224777	0.209405	0.0153722	0.005815	Up	No	Yes
Mbd2	0.156368	0.163815	0.17893	0.159723	0.146188	0.151987	0.15725	0.138079	0.164709	0.148376	0.0163328	0.013268	Up	No	Yes
Synpr	0.0625253	0.0372295	0.0677646	0.0457973	0.0466498	0.028218	0.0479255	0.0230671	0.0533292	0.0364651	0.0168641	0.01083	Up	No	Yes
Gatsl2	0.219979	0.21107	0.187879	0.192811	0.205264	0.188251	0.18283	0.167377	0.202935	0.18593	0.0170041	0.034207	Up	No	Yes
Erp44	0.126659	0.102795	0.154255	0.0995491	0.116348	0.0876354	0.123366	0.0843878	0.120814	0.102934	0.0178801	0.028244	Up	No	Yes
Ppp1r9a	0.0843004	0.0877408	0.0685448	0.0938382	0.0595701	0.0665904	0.04871	0.0865192	0.083606	0.0653474	0.0182586	0.017042	Up	No	Yes
Gck	0.236517	0.165344	0.224053	0.197423	0.22447	0.136816	0.210962	0.177073	0.205834	0.18733	0.0185038	0.016756	Up	No	Yes
Cntnap2	0.111758	0.0741007	0.113662	0.118267	0.0861474	0.0649725	0.0972278	0.0840503	0.104447	0.0830995	0.0213475	0.029671	Up	No	Yes
Pik3r1	0.185314	0.132885	0.203216	0.218083	0.157769	0.126346	0.166489	0.201492	0.184874	0.163024	0.0218502	0.04463	Up	No	Yes
Dpp10	0.068766	0.0401573	0.0586837	0.0688882	0.0468444	0.0265999	0.0297777	0.0413028	0.0591238	0.0361312	0.0229926	0.007122	Up	No	Yes
Tmem108	0.0977455	0.0740457	0.133777	0.103817	0.0858446	0.0428038	0.0992676	0.0863233	0.102346	0.0785598	0.0237864	0.021823	Up	No	Yes
Tpd52	0.316667	0.274954	0.308588	0.28028	0.301988	0.239261	0.282262	0.256204	0.295122	0.269929	0.0251937	0.010005	Up	No	Yes
Erp29	0.238431	0.190968	0.262754	0.184465	0.197585	0.171671	0.24656	0.15941	0.219154	0.193807	0.0253476	0.019048	Up	No	Yes
Rasgrf1	0.134819	0.0926889	0.158474	0.136324	0.113214	0.079849	0.118769	0.108313	0.130577	0.105036	0.0255403	0.020275	Up	No	Yes
Ppm1l	0.257926	0.178102	0.231298	0.226692	0.246069	0.145298	0.196065	0.18634	0.223504	0.193443	0.0300611	0.017252	Up	No	Yes
Dynlt1c	0.28212	0.231718	0.205919	0.165466	0.249772	0.185171	0.189053	0.136062	0.221305	0.190015	0.0312908	0.014302	Up	No	Yes
Gstz1	0.255451	0.211785	0.239922	0.237406	0.224413	0.188263	0.221461	0.181676	0.236141	0.203953	0.0321876	0.030001	Up	No	Yes
Fndc3a	0.207081	0.10709	0.240828	0.155096	0.171139	0.0925254	0.183427	0.130598	0.177524	0.144422	0.0331016	0.036836	Up	No	Yes
Slc8a1	0.187143	0.0955352	0.274731	0.215745	0.14498	0.0763512	0.22192	0.18731	0.193289	0.15764	0.0356484	0.017146	Up	No	Yes
Pip5k1b	0.383648	0.266042	0.399333	0.371348	0.378497	0.207477	0.353291	0.306422	0.355093	0.311422	0.0436708	0.04739	Up	No	Yes
Ece1	0.609547	0.490987	0.477803	0.510028	0.492048	0.386005	0.445192	0.412954	0.522091	0.43405	0.0880415	0.018798	Up	No	Yes
Ppy	0.341332	0.608129	0.210836	0.489459	0.213227	0.46507	0.17014	0.303983	0.412439	0.288105	0.124334	0.026448	Up	No	Yes
Scd2	0.156977	0.173508	0.200732	0.197489	0.1905	0.192041	0.213624	0.224243	0.182177	0.205102	-0.0229253	0.014947	Down	Yes	No
Rab11a	0.159647	0.144417	0.108203	0.118604	0.177529	0.175821	0.113599	0.138857	0.132718	0.151451	-0.0187334	0.039144	Down	Yes	No
Vdac3	0.0643762	0.0748311	0.0682939	0.0824163	0.0835608	0.097718	0.0794092	0.0962457	0.0724794	0.0892334	-0.0167541	0.007946	Down	Yes	No
Grn	0.0422936	0.0678685	0.0310157	0.0503209	0.0575985	0.0786813	0.0407319	0.0740281	0.0478746	0.06276	-0.0148853	0.018414	Down	Yes	No
Kat6a	0.0415797	0.0476126	0.0547411	0.0549	0.0547546	0.0572136	0.0587676	0.0622538	0.0497084	0.0582474	-0.00853904	0.021239	Down	Yes	No
Rara	0.0148061	0.0191118	0.00640974	0.0139189	0.0208956	0.0268832	0.0119606	0.0235126	0.0135616	0.020813	-0.00725134	0.00416	Down	Yes	No
Ndufb4	0.115567	0.140675	0.098887	0.0889586	0.120273	0.144059	0.110631	0.0978807	0.111022	0.118211	-0.0071891	0.033399	Down	Yes	No
Elmo1	0.0163436	0.0175054	0.0240573	0.0293409	0.0208831	0.0265154	0.0312052	0.0367241	0.0218118	0.0288319	-0.00702015	0.004744	Down	Yes	No
Tom1l1	0.0275384	0.0347301	0.0310774	0.0347895	0.0358121	0.037992	0.0418552	0.040292	0.0320338	0.0389878	-0.006954	0.023844	Down	Yes	No
Plagl1	0.0055662	0.0131339	0.00905255	0.00588432	0.0103808	0.0223948	0.0114973	0.0154805	0.00840924	0.0149383	-0.00652911	0.03326	Down	Yes	No
Cttnbp2	0.0256812	0.0306347	0.0598355	0.0465975	0.0289703	0.0406285	0.0652621	0.0536361	0.0406872	0.0471242	-0.00643703	0.019808	Down	Yes	No
Fam173a	0.0513554	0.0518983	0.0516241	0.048592	0.0563406	0.0585635	0.0587151	0.0554456	0.0508675	0.0572662	-0.00639872	0.000907	Down	Yes	No
Gspt1	0.0691536	0.0547651	0.0450697	0.0680472	0.0738451	0.0614706	0.0533614	0.0734919	0.0592589	0.0655423	-0.00628336	0.004113	Down	Yes	No
Abca7	0.0429881	0.0357934	0.0360717	0.0366719	0.0466344	0.0409782	0.0477269	0.0409036	0.0378813	0.0440608	-0.00617949	0.044528	Down	Yes	No
Srebf1	0.0328336	0.021862	0.0251233	0.0322945	0.0356896	0.0288316	0.0335626	0.0360875	0.0280284	0.0335428	-0.00551448	0.024663	Down	Yes	No
Synpo	0.00348249	0.00803674	0.00258555	0.00474518	0.00507257	0.0118249	0.0100699	0.0136135	0.00471249	0.0101452	-0.00543273	0.047387	Down	Yes	No
Mtmr12	0.0196407	0.0154742	0.0158067	0.0239659	0.025697	0.0183761	0.0199177	0.0318212	0.0187219	0.023953	-0.00523113	0.017196	Down	Yes	No
Prkaa2	0.00165459	0.0054644	0.0026196	0.00630224	0.00350716	0.0143993	0.00628987	0.0121336	0.00401021	0.00908247	-0.00507226	0.044705	Down	Yes	No
Sos2	0.0179184	0.0184018	0.0146004	0.0158953	0.0237713	0.0214357	0.0193184	0.0211635	0.016704	0.0214222	-0.00471825	0.004438	Down	Yes	No
B3gntl1	0.00961864	0.0067146	0.0101293	0.0131793	0.0172368	0.0124487	0.011389	0.0174263	0.00991046	0.0146252	-0.00471475	0.03913	Down	Yes	No
Tbcel	0.0258648	0.0283292	0.0233196	0.030588	0.0306178	0.0324873	0.0294111	0.0343632	0.0270254	0.0317198	-0.00469445	0.002669	Down	Yes	No
Trappc13	0.0423342	0.0462549	0.0660549	0.0516035	0.0453813	0.0520039	0.068683	0.0581044	0.0515619	0.0560432	-0.00448125	0.018826	Down	Yes	No
Mcm2	0.0111533	0.0157131	0.0434711	0.0345484	0.0163621	0.0188943	0.0473901	0.0390147	0.0262215	0.0304153	-0.00419384	0.002271	Down	Yes	No
Mbip	0.0052374	0.00825023	0.00569881	0.00795129	0.00901664	0.0118821	0.00833229	0.0145093	0.00678443	0.0109351	-0.00415065	0.015995	Down	Yes	No
Sav1	0.015874	0.0286443	0.0278165	0.0229976	0.0199454	0.0356562	0.0291053	0.0271116	0.0238331	0.0279546	-0.00412152	0.038728	Down	Yes	No
Plekhf2	0.0100032	0.0153526	0.00805129	0.014335	0.013283	0.0206428	0.0108081	0.0183746	0.0119355	0.0157772	-0.00384163	0.006021	Down	Yes	No
Mfsd7b	0.0116314	0.00946801	0.0183091	0.0170149	0.014539	0.0135556	0.0243511	0.0186891	0.0141058	0.0177837	-0.00367783	0.028804	Down	Yes	No
Speg	0.00851949	0.00887975	0.00587346	0.00827372	0.0110633	0.0141981	0.00705462	0.0135854	0.00788661	0.0114754	-0.00358876	0.040366	Down	Yes	No
Prelid2	0.0035638	0.00604529	0.000557186	0.00295101	0.00600119	0.00823053	0.00380664	0.00727064	0.00327932	0.00632725	-0.00304793	0.007941	Down	Yes	No
Plek2	0.000847057	0.00138946	0.0025769	0.00438077	0.00297358	0.00236487	0.00702871	0.00901466	0.00229855	0.00534545	-0.00304691	0.0424	Down	Yes	No
Fzd7	0.00546679	0.00332823	0.00210004	0.00427884	0.00703299	0.00561385	0.00715834	0.00700069	0.00379347	0.00670147	-0.00290799	0.030933	Down	Yes	No
Lrrc24	0.021129	0.0112779	0.00928191	0.0151755	0.0222988	0.0148312	0.0135881	0.0174515	0.0142161	0.0170424	-0.00282632	0.026625	Down	Yes	No
Josd2	0.0125739	0.0126864	0.0186587	0.0203886	0.0162473	0.0156228	0.0194392	0.0239463	0.0160769	0.0188139	-0.00273701	0.026714	Down	Yes	No
Slc9a5	0.000256346	0.00139228	0.00103832	0.00260354	0.00066765	0.00389155	0.00248584	0.00460123	0.00132262	0.00291157	-0.00158895	0.038023	Down	Yes	No
Cd40	0.000789288	0.0012859	0.000886466	0.0020241	0.00126489	0.00354232	0.00276265	0.00285909	0.00124644	0.00260724	-0.0013608	0.048122	Down	Yes	No
Gdnf	0	0.00052677	0.000407645	0.000465274	0.000829233	0.0023459	0.00134163	0.00185313	0.000349922	0.00159247	-0.00124255	0.012025	Down	Yes	No
Rad51b	0.00451435	0.00348538	0.0116916	0.0127843	0.00557117	0.00515812	0.0124427	0.0134694	0.00811892	0.00916034	-0.00104143	0.019116	Down	Yes	No
Cldn34c1	0.0055445	0.00430898	0.00412326	0.00391896	0.00334108	0.0034218	0.002747	0.00323072	0.00447393	0.00318515	0.00128877	0.031627	Up	Yes	No
Kcnj5	0.00263275	0.00299158	0.00340155	0.00389621	0.00120924	0.00261183	0.000952428	0.00185463	0.00323052	0.00165703	0.00157349	0.039634	Up	Yes	No
P2ry14	0.0143893	0.0152196	0.0192639	0.0178501	0.0141112	0.0129739	0.0170483	0.0154771	0.0166807	0.0149026	0.00177808	0.038153	Up	Yes	No
Tfap2e	0.00774859	0.00524003	0.0107829	0.00579246	0.00592192	0.00362695	0.00940708	0.00338397	0.007391	0.00558498	0.00180602	0.003823	Up	Yes	No
Mroh5	0.00588109	0.00849093	0.00490278	0.003375	0.00454365	0.00549273	0.00274466	0.00251716	0.00566245	0.00382455	0.0018379	0.029846	Up	Yes	No
Usp24	0.00685863	0.00378465	0.0100158	0.00268543	0.00517857	0.00204988	0.00663754	0.00110418	0.00583614	0.00374254	0.00209359	0.016487	Up	Yes	No
Mfsd4b1	0.00265755	0.00589821	0.00475144	0.00364022	0.00115025	0.00227104	0.00320955	0.00145647	0.00423685	0.00202183	0.00221503	0.020884	Up	Yes	No
Klhl8	0.0213186	0.0187526	0.0228669	0.0194262	0.0184566	0.0158178	0.0200783	0.0164293	0.0205911	0.0176955	0.00289558	8e-06	Up	Yes	No
Cep126	0.0188274	0.0151434	0.0258944	0.0224079	0.016542	0.0110842	0.02199	0.0196787	0.0205683	0.0173237	0.00324457	0.005035	Up	Yes	No
Zfp24	0.0385046	0.0376352	0.0341434	0.0431621	0.032869	0.0357529	0.0318369	0.0389031	0.0383613	0.0348405	0.00352082	0.02755	Up	Yes	No
Ranbp17	0.0419129	0.0284652	0.0517594	0.0412065	0.0404168	0.0238528	0.0462393	0.0384716	0.040836	0.0372452	0.00359086	0.028826	Up	Yes	No
U2surp	0.075879	0.0660887	0.0762172	0.0664207	0.0731151	0.062792	0.0727614	0.06098	0.0711514	0.0674121	0.00373928	0.007797	Up	Yes	No
Ccdc162	0.011219	0.00819284	0.0130016	0.0117222	0.00572903	0.00539208	0.00937087	0.00735418	0.0110339	0.00696154	0.00407238	0.005665	Up	Yes	No
Gdap1	0.0472398	0.0298346	0.0480127	0.0396447	0.0430304	0.0241588	0.0440565	0.0352011	0.041183	0.0366117	0.00457125	0.001249	Up	Yes	No
Usp12	0.0300649	0.0393166	0.0378632	0.0324196	0.0245921	0.0314322	0.0361983	0.0284518	0.0349161	0.0301686	0.00474747	0.035886	Up	Yes	No
Pdgfrl	0.0304853	0.0220606	0.0365534	0.0437463	0.0273575	0.0186498	0.0314775	0.0341484	0.0332114	0.0279083	0.0053031	0.038155	Up	Yes	No
Mrps27	0.0265626	0.0258039	0.0276758	0.0239934	0.0184691	0.0198826	0.0232336	0.0210589	0.0260089	0.020661	0.00534787	0.016616	Up	Yes	No
Myh14	0.0237435	0.0340844	0.0218658	0.0353046	0.0218531	0.0263532	0.0151781	0.0298382	0.0287496	0.0233057	0.00544391	0.023406	Up	Yes	No
Arl4d	0.0130586	0.0178875	0.0101236	0.0131271	0.00813832	0.0136203	0.00316413	0.00686643	0.0135492	0.00794729	0.00560188	0.002783	Up	Yes	No
Ttll7	0.0653747	0.0344993	0.0759334	0.049081	0.0563565	0.030311	0.0695658	0.0455436	0.0562221	0.0504442	0.00577787	0.018585	Up	Yes	No
Rrp7a	0.0285442	0.0355456	0.0353867	0.0343163	0.0240191	0.0324616	0.0258316	0.02547	0.0334482	0.0269456	0.0065026	0.026505	Up	Yes	No
Lhx1	0.0185893	0.00528071	0.0154284	0.0156337	0.00959718	0.00289538	0.0085666	0.00766802	0.0137331	0.00718179	0.00655126	0.020459	Up	Yes	No
Ror1	0.0667156	0.0336758	0.0378378	0.0584872	0.0567694	0.0293735	0.0295973	0.0545687	0.0491791	0.0425772	0.00660186	0.021061	Up	Yes	No
Atad1	0.0764887	0.0781212	0.0803458	0.0899968	0.0737564	0.069335	0.072021	0.081543	0.0812381	0.0741639	0.00707424	0.016473	Up	Yes	No
Dtx1	0.0231149	0.00991706	0.0186186	0.0159097	0.0111328	0.00765038	0.0115012	0.00867487	0.0168901	0.0097398	0.00715026	0.036622	Up	Yes	No
Tuft1	0.0584689	0.050128	0.0602738	0.0723845	0.0500933	0.0405774	0.0549344	0.0666263	0.0603138	0.0530578	0.00725596	0.005682	Up	Yes	No
Ak5	0.0241725	0.013965	0.0214525	0.0177086	0.0150995	0.00962347	0.00897939	0.0128909	0.0193246	0.0116483	0.00767631	0.02805	Up	Yes	No
2010300C02Rik	0.0229919	0.0219942	0.019054	0.0295307	0.0143973	0.0186613	0.012161	0.0175373	0.0233927	0.0156892	0.00770348	0.023496	Up	Yes	No
Tax1bp1	0.125474	0.114486	0.146958	0.127969	0.12003	0.10643	0.135168	0.121705	0.128722	0.120833	0.00788835	0.011285	Up	Yes	No
Zfp574	0.032837	0.0282247	0.027382	0.0318798	0.0194563	0.0251944	0.021208	0.0213353	0.0300809	0.0217985	0.00828241	0.036479	Up	Yes	No
Rgag4	0.0281786	0.0385254	0.0318914	0.0339253	0.0201505	0.0256881	0.0269577	0.0243243	0.0331302	0.0242801	0.00885004	0.012582	Up	Yes	No
Ndst4	0.031394	0.0332953	0.020606	0.0289045	0.0221	0.0225874	0.0127507	0.0197905	0.02855	0.0193071	0.00924281	0.000548	Up	Yes	No
Map2k4	0.0673646	0.0667087	0.0759514	0.0594855	0.0565133	0.0602714	0.0614628	0.0539984	0.0673776	0.0580615	0.0093161	0.020817	Up	Yes	No
Thrb	0.0337189	0.0210569	0.0186114	0.0153357	0.0175861	0.00979158	0.0113081	0.012381	0.0221807	0.0127667	0.00941402	0.044049	Up	Yes	No
Rtn4rl1	0.0367058	0.0216612	0.0384241	0.0442239	0.0252377	0.0167915	0.0278206	0.032464	0.0352537	0.0255784	0.0096753	0.009406	Up	Yes	No
Atg10	0.0900777	0.0573751	0.0870526	0.0822733	0.079326	0.0484997	0.073466	0.0726564	0.0791947	0.068487	0.0107077	0.001923	Up	Yes	No
Ubxn10	0.0459449	0.042054	0.0286688	0.0413621	0.0316833	0.0293676	0.0260208	0.0278763	0.0395074	0.028737	0.0107704	0.02894	Up	Yes	No
Rabgap1l	0.0671954	0.0545639	0.066238	0.067409	0.0566233	0.0436661	0.0536641	0.0581762	0.0638516	0.0530324	0.0108192	0.000556	Up	Yes	No
Bet1	0.0475334	0.0496273	0.0782418	0.0493497	0.0389436	0.0358818	0.059789	0.0460584	0.056188	0.0451682	0.0110198	0.043409	Up	Yes	No
Man1c1	0.0316304	0.0500435	0.0298368	0.0401796	0.0251137	0.0305766	0.0189013	0.0318677	0.0379226	0.0266148	0.0113077	0.029061	Up	Yes	No
Gcnt2	0.0566026	0.0520593	0.0853115	0.0723369	0.0436395	0.0477375	0.0645029	0.0635171	0.0665776	0.0548493	0.0117283	0.044144	Up	Yes	No
Dnajc10	0.153084	0.143983	0.204138	0.165318	0.143718	0.133218	0.189552	0.149155	0.166631	0.153911	0.0127198	0.00409	Up	Yes	No
Rab3a	0.0952223	0.0757564	0.0881768	0.0817341	0.0787756	0.0642876	0.0754379	0.0675063	0.0852224	0.0715019	0.0137205	0.001022	Up	Yes	No
Dlg4	0.0490527	0.0738061	0.0598702	0.0656011	0.0436464	0.0577416	0.0444728	0.0449246	0.0620825	0.0476964	0.0143862	0.020801	Up	Yes	No
Spint1	0.0978551	0.0834904	0.0621093	0.0827821	0.0799178	0.0665532	0.0559061	0.0637144	0.0815592	0.0665229	0.0150363	0.014963	Up	Yes	No
Cdh2	0.12495	0.0924564	0.108593	0.116388	0.107049	0.0869483	0.0858248	0.0942312	0.110597	0.0935134	0.0170834	0.023679	Up	Yes	No
Prps1	0.180628	0.158036	0.152951	0.175888	0.161231	0.147918	0.137151	0.152657	0.166876	0.149739	0.0171365	0.008666	Up	Yes	No
Rfx3	0.150924	0.0678654	0.162975	0.114768	0.126925	0.0567735	0.141157	0.102483	0.124133	0.106835	0.0172984	0.013275	Up	Yes	No
Mrln	0.0613539	0.075852	0.122778	0.0816896	0.0540597	0.0540739	0.0963771	0.0642786	0.0854183	0.0671973	0.018221	0.020894	Up	Yes	No
H1f0	0.1661	0.20811	0.209494	0.228543	0.147613	0.180786	0.18683	0.223708	0.203062	0.184735	0.0183272	0.032401	Up	Yes	No
Nsf	0.142012	0.102073	0.152289	0.130755	0.118048	0.0896229	0.130729	0.115119	0.131782	0.11338	0.0184024	0.006095	Up	Yes	No
Sod1	0.468937	0.5223	0.528746	0.460392	0.436185	0.510859	0.50755	0.447401	0.495094	0.475499	0.019595	0.027728	Up	Yes	No
Gtf2i	0.223196	0.232199	0.193761	0.233106	0.196413	0.212788	0.171071	0.221855	0.220566	0.200532	0.0200339	0.008918	Up	Yes	No
Uhrf2	0.128466	0.103401	0.126683	0.110302	0.0955537	0.08536	0.104765	0.102533	0.117213	0.0970531	0.0201602	0.030295	Up	Yes	No
Ppp1r15a	0.168607	0.130326	0.150675	0.151914	0.141384	0.106055	0.132301	0.136513	0.15038	0.129063	0.0213172	0.00422	Up	Yes	No
Kctd8	0.0957624	0.0494893	0.129112	0.125179	0.0741316	0.0343722	0.110956	0.0870574	0.0998855	0.0766292	0.0232564	0.020095	Up	Yes	No
Tmtc2	0.222886	0.133455	0.162032	0.184077	0.187699	0.1107	0.128366	0.151802	0.175613	0.144642	0.0309708	0.001587	Up	Yes	No
Insm1	0.219233	0.210782	0.2813	0.278563	0.210042	0.161589	0.249962	0.237098	0.247469	0.214673	0.0327967	0.032442	Up	Yes	No
Runx1t1	0.131343	0.0937435	0.0701348	0.100683	0.0667943	0.06884	0.0504739	0.0611611	0.098976	0.0618173	0.0371586	0.034344	Up	Yes	No
Entpd3	0.312397	0.221805	0.329121	0.265329	0.283437	0.182728	0.300355	0.207311	0.282163	0.243458	0.0387055	0.011076	Up	Yes	No
Ocrl	0.204244	0.187792	0.200326	0.196346	0.161854	0.154421	0.158463	0.147574	0.197177	0.155578	0.0415988	0.000947	Up	Yes	No
Spcs2	0.377328	0.372091	0.458642	0.445245	0.330301	0.337882	0.417635	0.3829	0.413326	0.367179	0.0461472	0.004569	Up	Yes	No
Gnao1	0.4382	0.327309	0.397089	0.384719	0.383188	0.266005	0.361142	0.326659	0.386829	0.334248	0.052581	0.002683	Up	Yes	No
Hs6st3	0.5205	0.242675	0.48705	0.453816	0.435443	0.22003	0.447095	0.367617	0.42601	0.367546	0.0584641	0.035835	Up	Yes	No
Trpm3	0.512667	0.253813	0.511153	0.291853	0.380448	0.223722	0.456711	0.219689	0.392371	0.320142	0.0722292	0.045163	Up	Yes	No
Gpx3	0.716485	0.643845	0.518485	0.439361	0.689082	0.5233	0.438834	0.325982	0.579544	0.4943	0.0852443	0.027771	Up	Yes	No
Pyy	1.74636	2.1251	0.994153	1.5127	1.00975	1.66719	0.798258	0.897227	1.59458	1.09311	0.501473	0.023207	Up	Yes	No
mt-Nd1	1.49627	1.8035	1.31434	1.54125	1.64643	1.90048	1.37966	1.71121	1.53884	1.65944	-0.120604	0.015216	Down	No	No
mt-Co1	0.610894	0.752382	0.324513	0.653576	0.735649	0.873162	0.362107	0.814979	0.585341	0.696474	-0.111133	0.023904	Down	No	No
mt-Nd4	1.88734	1.9742	1.75294	1.99694	2.04813	2.03807	1.84524	2.12053	1.90285	2.01299	-0.110138	0.013188	Down	No	No
mt-Cytb	2.14291	2.21347	1.85546	2.03947	2.25961	2.25622	1.93752	2.18871	2.06283	2.16051	-0.0976872	0.023577	Down	No	No
mt-Nd2	1.02664	1.06555	1.28053	1.04013	1.17699	1.1135	1.3311	1.14693	1.10321	1.19213	-0.0889188	0.036264	Down	No	No
mt-Nd6	1.07927	1.31109	1.29855	1.20571	1.21909	1.36869	1.35604	1.28836	1.22365	1.30804	-0.0843916	0.022445	Down	No	No
Trim30a	1.06592	1.46621	0.895579	0.816488	1.11695	1.53868	0.986175	0.853541	1.06105	1.12384	-0.0627882	0.012931	Down	No	No
mt-Nd5	0.578138	0.386026	0.473643	0.338011	0.622942	0.420532	0.52772	0.409761	0.443954	0.495239	-0.0512843	0.007439	Down	No	No
Fam221b	0.229932	0.226986	0.225189	0.259955	0.243887	0.280936	0.2669	0.30861	0.235515	0.275083	-0.0395675	0.021153	Down	No	No
mt-Nd3	0.221558	0.186418	0.217183	0.203449	0.278061	0.200607	0.244862	0.243641	0.207152	0.241793	-0.0346405	0.031107	Down	No	No
H2afz	0.151971	0.208941	0.364916	0.290565	0.169657	0.233468	0.391938	0.343693	0.254098	0.284689	-0.0305908	0.029167	Down	No	No
Prkch	0.145542	0.195688	0.192197	0.164849	0.176942	0.230723	0.225748	0.179991	0.174569	0.203351	-0.0287818	0.008276	Down	No	No
Hnrnpa2b1	0.242051	0.298483	0.259134	0.296872	0.258406	0.333078	0.280228	0.319747	0.274135	0.297865	-0.0237295	0.008749	Down	No	No
Cpeb1	0.0724646	0.0727637	0.0636217	0.111737	0.0868087	0.0978666	0.0787914	0.150311	0.0801467	0.103445	-0.0232978	0.025841	Down	No	No
Vdac1	0.10006	0.106036	0.0743676	0.087438	0.107378	0.139798	0.100402	0.105553	0.0919752	0.113283	-0.0213076	0.03267	Down	No	No
Sdcbp	0.068766	0.067776	0.0521287	0.0706785	0.0867803	0.0995202	0.0605049	0.0858213	0.0648373	0.0831567	-0.0183194	0.03355	Down	No	No
Rap1a	0.102401	0.07639	0.0832019	0.0825113	0.1065	0.0903062	0.110747	0.10448	0.086126	0.103008	-0.0168823	0.045322	Down	No	No
Eif3m	0.0694528	0.0852733	0.0557853	0.0464285	0.0750349	0.098138	0.0799231	0.0666066	0.064235	0.0799256	-0.0156907	0.031413	Down	No	No
Snrpe	0.0779818	0.0921749	0.0621566	0.073834	0.0841268	0.113939	0.0800741	0.0875604	0.0765368	0.0914251	-0.0148883	0.021099	Down	No	No
Crtap	0.0224318	0.0259992	0.0224764	0.0229998	0.0302254	0.047035	0.0421752	0.0321067	0.0234768	0.0378856	-0.0144088	0.025222	Down	No	No
Hist1h2ao	0.0981918	0.0667935	0.252809	0.146612	0.103223	0.090545	0.264917	0.163356	0.141102	0.15551	-0.0144085	0.035246	Down	No	No
Lrrc58	0.139975	0.147412	0.139133	0.142176	0.153596	0.170541	0.153332	0.14832	0.142174	0.156447	-0.0142735	0.026134	Down	No	No
Arpc5	0.162571	0.195977	0.132322	0.161646	0.184189	0.208235	0.146069	0.17023	0.163129	0.177181	-0.0140522	0.014437	Down	No	No
Gt(ROSA)26Sor	0.0273078	0.0284248	0.0269434	0.0292361	0.0350778	0.0419581	0.0451675	0.0451187	0.027978	0.0418305	-0.0138525	0.00854	Down	No	No
Crot	0.291739	0.26104	0.277317	0.287216	0.299986	0.26835	0.295031	0.304841	0.279328	0.292052	-0.0127241	0.021162	Down	No	No
Khsrp	0.0687466	0.0791592	0.0704389	0.0720541	0.0742557	0.0982043	0.0778154	0.0907276	0.0725997	0.0852507	-0.012651	0.039231	Down	No	No
Ndufc1	0.0821371	0.0795139	0.0891712	0.0730687	0.0989525	0.0848969	0.104978	0.0842846	0.0809727	0.0932781	-0.0123053	0.018057	Down	No	No
Arhgef12	0.101161	0.0977084	0.113611	0.105375	0.118778	0.109602	0.123693	0.114806	0.104464	0.11672	-0.0122558	0.007129	Down	No	No
Amy2a5	0.024323	0.0587021	0.0563542	0.0195658	0.0400829	0.066537	0.0607467	0.0401823	0.0397363	0.0518872	-0.012151	0.046011	Down	No	No
Atp5j2	0.152445	0.140916	0.174424	0.124187	0.161557	0.147838	0.183262	0.145626	0.147993	0.159571	-0.011578	0.039935	Down	No	No
Gyg	0.0523423	0.0490422	0.0475862	0.0481131	0.0596102	0.0688742	0.0572212	0.0572616	0.0492709	0.0607418	-0.0114709	0.027136	Down	No	No
Gltp	0.0226398	0.0472167	0.0745296	0.0692218	0.0357994	0.054701	0.0808904	0.0880426	0.053402	0.0648583	-0.0114564	0.02818	Down	No	No
Banf1	0.0619195	0.0814383	0.100095	0.112596	0.0784599	0.0970171	0.106086	0.119789	0.089012	0.100338	-0.0113261	0.025967	Down	No	No
Bax	0.0804148	0.0765631	0.0631362	0.0728549	0.0914939	0.0930726	0.0722047	0.0812437	0.0732422	0.0845037	-0.0112615	0.008771	Down	No	No
Rab31	0.0316005	0.0272385	0.0328393	0.0470722	0.0451208	0.0352807	0.0479527	0.0552506	0.0346876	0.0459012	-0.0112136	0.008617	Down	No	No
Adamts3	0.062132	0.0457138	0.0479031	0.0495373	0.0655692	0.0562394	0.0653744	0.0627553	0.0513215	0.0624846	-0.0111631	0.032228	Down	No	No
Timm8b	0.0502032	0.0369406	0.0290894	0.0314591	0.0534598	0.0501689	0.0472058	0.0410396	0.0369231	0.0479685	-0.0110454	0.038672	Down	No	No
Cbx5	0.066776	0.0714871	0.12248	0.0565498	0.0750951	0.0804832	0.128535	0.0755896	0.0793232	0.0899257	-0.0106025	0.034782	Down	No	No
Snx5	0.0901111	0.102794	0.0897486	0.105563	0.0967885	0.108255	0.106605	0.118096	0.0970542	0.107436	-0.0103818	0.029669	Down	No	No
Dynlt3	0.0686511	0.06007	0.0569517	0.0547732	0.0716613	0.0707302	0.0671712	0.0721631	0.0601115	0.0704314	-0.01032	0.03911	Down	No	No
Atp11a	0.0232625	0.0306973	0.0321256	0.034824	0.0385249	0.032946	0.0407341	0.0481956	0.0302273	0.0401001	-0.00987281	0.042372	Down	No	No
Ano6	0.0421167	0.0500851	0.0570543	0.07607	0.0477398	0.0618809	0.069493	0.0856539	0.0563315	0.0661919	-0.00986034	0.007705	Down	No	No
Sumo2	0.0961991	0.107493	0.103143	0.114512	0.109283	0.119288	0.11059	0.121448	0.105337	0.115152	-0.00981534	0.007835	Down	No	No
Ube2v1	0.0635471	0.0557409	0.0463862	0.0536138	0.0797334	0.0657198	0.0568327	0.0559488	0.054822	0.0645587	-0.00973667	0.041669	Down	No	No
Rbm15b	0.054425	0.0617625	0.0972662	0.0888612	0.0657658	0.0781232	0.10112	0.0957669	0.0755788	0.0851939	-0.00961513	0.038622	Down	No	No
Ranbp1	0.0675693	0.10061	0.086794	0.0938933	0.0735534	0.112949	0.0927413	0.108031	0.0872166	0.0968188	-0.0096022	0.02043	Down	No	No
Ap1ar	0.0254241	0.0193272	0.0307208	0.0315446	0.035385	0.0284408	0.0450202	0.0357886	0.0267542	0.0361586	-0.00940447	0.019741	Down	No	No
Adam17	0.0133984	0.0239882	0.0181026	0.0253365	0.0232122	0.0269287	0.0294805	0.0383171	0.0202064	0.0294846	-0.00927822	0.024633	Down	No	No
Eci2	0.0236817	0.0342152	0.0223406	0.0244159	0.0334778	0.0374255	0.0309513	0.0393137	0.0261634	0.0352921	-0.0091287	0.031865	Down	No	No
Tbc1d19	0.0355913	0.0239962	0.0475969	0.0416586	0.0471793	0.0334934	0.0605115	0.0437304	0.0372108	0.0462286	-0.00901787	0.03366	Down	No	No
Dctn2	0.0915458	0.0884378	0.0904611	0.0893225	0.101356	0.103684	0.0963528	0.0939696	0.0899418	0.0988408	-0.00889897	0.033526	Down	No	No
Ptpn9	0.0570731	0.0538229	0.0646457	0.0648149	0.0628111	0.0588784	0.0741617	0.0794308	0.0600892	0.0688205	-0.00873136	0.028358	Down	No	No
Pde6a	0.0499194	0.0480297	0.0756811	0.0596772	0.0556392	0.0518325	0.0902283	0.0696576	0.0583269	0.0668394	-0.00851253	0.037774	Down	No	No
Fam168b	0.0365314	0.0296481	0.0456919	0.0522134	0.0456967	0.0397377	0.057961	0.0541857	0.0410212	0.0493953	-0.00837406	0.033023	Down	No	No
0610007P14Rik	0.0284238	0.021529	0.0364014	0.0310087	0.0392896	0.0354775	0.0419922	0.0340469	0.0293407	0.0377015	-0.00836082	0.043145	Down	No	No
Dnaja2	0.0701791	0.0713833	0.0652147	0.0778419	0.0774607	0.0853125	0.0705413	0.0846171	0.0711548	0.0794829	-0.00832811	0.02238	Down	No	No
Smc2	0.000653747	0.00403905	0.0495113	0.0271184	0.00610417	0.013355	0.0547413	0.0400962	0.0203306	0.0285742	-0.00824356	0.020614	Down	No	No
Actr2	0.0878629	0.089558	0.0970893	0.0896536	0.0962309	0.101473	0.101449	0.0978747	0.091041	0.0992569	-0.00821589	0.012945	Down	No	No
Srrt	0.0337916	0.0281295	0.0443993	0.0383112	0.038702	0.0397158	0.0546702	0.0442209	0.0361579	0.0443272	-0.00816933	0.015254	Down	No	No
Nop10	0.0480046	0.0662933	0.0595596	0.0639427	0.0583081	0.0735671	0.0653769	0.0729767	0.05945	0.0675572	-0.00810719	0.003744	Down	No	No
Nmt1	0.061032	0.0498264	0.0493852	0.0581972	0.0716486	0.0546448	0.059902	0.0636741	0.0546102	0.0624674	-0.00785717	0.015358	Down	No	No
Pold3	0.0217263	0.0201757	0.0295461	0.0260951	0.0268594	0.0235544	0.038215	0.0400649	0.0243858	0.0321734	-0.00778765	0.044603	Down	No	No
Myo7a	0.261479	0.189215	0.180963	0.1377	0.273354	0.196611	0.187788	0.142705	0.192339	0.200114	-0.00777511	0.012902	Down	No	No
Lig1	0.00795378	0.0181549	0.0595087	0.0497366	0.0123822	0.0269684	0.0653668	0.0606989	0.0338385	0.0413541	-0.00751558	0.014412	Down	No	No
Rspry1	0.0455359	0.0430345	0.048865	0.0551473	0.05545	0.0498248	0.0560393	0.0607937	0.0481457	0.0555269	-0.00738129	0.003847	Down	No	No
Taok1	0.107265	0.0819485	0.0869621	0.0993796	0.114898	0.0929704	0.0910632	0.105925	0.0938888	0.101214	-0.00732522	0.01458	Down	No	No
Wdr82	0.0332686	0.0551092	0.0346298	0.0544689	0.0425449	0.0612903	0.0389286	0.0635405	0.0443691	0.0515761	-0.00720696	0.009237	Down	No	No
Vps29	0.0373514	0.0341292	0.0414449	0.0307165	0.0483464	0.0391667	0.0462029	0.0386552	0.0359105	0.0430928	-0.00718229	0.016096	Down	No	No
Uqcc1	0.0429688	0.0322473	0.0337254	0.0387767	0.0492995	0.0392802	0.0444086	0.0427578	0.0369296	0.0439365	-0.00700695	0.015008	Down	No	No
Ccng1	0.0163838	0.0309751	0.0253658	0.0219543	0.0233524	0.0402008	0.0312209	0.027923	0.0236698	0.0306743	-0.00700452	0.002932	Down	No	No
Ing1	0.0686676	0.0738129	0.0846614	0.0751461	0.0759745	0.0758855	0.0953962	0.0829805	0.075572	0.0825592	-0.00698717	0.030437	Down	No	No
Mfap1b	0.0410161	0.0288635	0.0388804	0.0389053	0.0439203	0.0394218	0.0483184	0.0428678	0.0369163	0.0436321	-0.00671575	0.039593	Down	No	No
6330403K07Rik	0.0216381	0.0301032	0.0131812	0.0155243	0.0287889	0.038554	0.0209609	0.0188334	0.0201117	0.0267843	-0.00667262	0.010243	Down	No	No
Ppa1	0.042645	0.0349091	0.0574732	0.0402459	0.0500438	0.0369215	0.0639407	0.0502512	0.0438183	0.0502893	-0.00647102	0.030139	Down	No	No
Imp4	0.0259765	0.0203963	0.0230719	0.0224282	0.0313637	0.0300579	0.0291481	0.0270906	0.0229682	0.0294151	-0.00644684	0.010151	Down	No	No
Nrf1	0.0556111	0.0361297	0.0556894	0.0463942	0.0613159	0.0451092	0.0625926	0.050498	0.0484561	0.0548789	-0.00642283	0.008249	Down	No	No
F2rl1	0.0119095	0.00733204	0.00838718	0.0133488	0.0148939	0.0149197	0.0142814	0.0225187	0.0102444	0.0166534	-0.00640904	0.016788	Down	No	No
Mrpl19	0.0151376	0.0139813	0.021568	0.0199486	0.0226643	0.0185107	0.0299686	0.0250403	0.0176589	0.024046	-0.00638708	0.006411	Down	No	No
Chmp4c	0.0360199	0.0290414	0.0448819	0.0586964	0.0447085	0.0326264	0.0528603	0.0637426	0.0421599	0.0484844	-0.00632455	0.013507	Down	No	No
Tpp1	0.0505967	0.0523986	0.0469225	0.0661773	0.053833	0.0584764	0.0520673	0.0769831	0.0540238	0.06034	-0.00631618	0.029435	Down	No	No
Tfrc	0.0262298	0.0407065	0.0250364	0.025709	0.0343075	0.042806	0.0304534	0.035155	0.0294204	0.0356805	-0.00626006	0.030631	Down	No	No
Eepd1	0.00941222	0.0109953	0.0110587	0.011362	0.014615	0.0127317	0.0183903	0.0220022	0.010707	0.0169348	-0.00622773	0.044627	Down	No	No
Adrm1	0.0200582	0.0208076	0.0212486	0.0185276	0.0253038	0.0304968	0.0277556	0.0215388	0.0201605	0.0262737	-0.0061132	0.021955	Down	No	No
Gba	0.0275201	0.0277166	0.0173317	0.0147737	0.0341133	0.0302988	0.0242824	0.0227414	0.0218355	0.027859	-0.00602344	0.014658	Down	No	No
Esf1	0.0274951	0.0215374	0.0339592	0.0330334	0.0340313	0.0294577	0.0385876	0.037859	0.0290063	0.0349839	-0.00597762	0.004553	Down	No	No
Frrs1	0.0213443	0.0261814	0.0143471	0.0266117	0.0258547	0.0328655	0.0161963	0.0371217	0.0221211	0.0280096	-0.00588843	0.048693	Down	No	No
Mcm7	0.0086354	0.0127903	0.0157468	0.0229893	0.00943409	0.0207191	0.0248581	0.0285948	0.0150404	0.0209015	-0.00586108	0.049736	Down	No	No
Pnpo	0.0136234	0.00701617	0.00700967	0.0113773	0.0176702	0.0137885	0.0154547	0.015478	0.00975664	0.0155979	-0.00584121	0.012268	Down	No	No
Hivep2	0.0809758	0.0447411	0.0760923	0.113834	0.0830108	0.0481542	0.0842377	0.12304	0.0789108	0.0846107	-0.00569992	0.04753	Down	No	No
Phospho2	0.0333401	0.0205985	0.0279935	0.0193403	0.0366371	0.0284257	0.0325375	0.0264465	0.0253181	0.0310117	-0.0056936	0.012805	Down	No	No
Inpp5d	0.00151599	0.00104053	0.00221177	0.00169315	0.00500428	0.00474077	0.0108141	0.0084831	0.00161536	0.00726057	-0.0056452	0.019919	Down	No	No
Ar	0.0287975	0.0160338	0.00748807	0.00969134	0.0379981	0.0207256	0.0134671	0.0123171	0.0155027	0.021127	-0.00562429	0.026548	Down	No	No
Sugt1	0.0366029	0.0417063	0.0363913	0.0300016	0.0444777	0.0460409	0.0417776	0.0348502	0.0361755	0.0417866	-0.00561108	0.005629	Down	No	No
Arpin	0.0206224	0.0178281	0.0214657	0.0209878	0.0255702	0.0240718	0.0236357	0.0297762	0.020226	0.0257635	-0.00553747	0.027618	Down	No	No
Necap2	0.0126692	0.0167233	0.0137213	0.0172953	0.0147077	0.0241202	0.0186364	0.0248315	0.0151023	0.020574	-0.00547167	0.024147	Down	No	No
Dmwd	0.0258416	0.0403709	0.0229293	0.0302634	0.0304941	0.043301	0.0297487	0.037437	0.0298513	0.0352452	-0.00539394	0.012233	Down	No	No
Sf3a1	0.0388527	0.0315379	0.0409029	0.0384343	0.0427285	0.038311	0.0432683	0.0469163	0.0374319	0.042806	-0.00537409	0.030143	Down	No	No
Ftsj1	0.014667	0.0094582	0.0167467	0.0119538	0.0202882	0.018122	0.0193263	0.0163792	0.0132064	0.0185289	-0.00532251	0.02517	Down	No	No
Garnl3	0.0261456	0.0165823	0.0189111	0.020049	0.0329032	0.0221608	0.0201705	0.0276421	0.020422	0.0257191	-0.00529713	0.032841	Down	No	No
Brpf1	0.0160047	0.0180183	0.0265847	0.0291515	0.0246031	0.0220397	0.0294857	0.034474	0.0224398	0.0276506	-0.00521081	0.024215	Down	No	No
1500011K16Rik	0.024001	0.0206298	0.0264655	0.0232569	0.0293812	0.0283945	0.028658	0.0287077	0.0235883	0.0287854	-0.00519709	0.019986	Down	No	No
Nkain3	0.0200544	0.00709509	0.00935155	0.011086	0.0239165	0.0126099	0.0139298	0.017211	0.0118968	0.0169168	-0.00502002	0.002106	Down	No	No
Rcbtb2	0.0109382	0.0131012	0.0197731	0.0139862	0.017707	0.0199426	0.0238707	0.0161246	0.0144497	0.0194112	-0.00496159	0.022249	Down	No	No
Mrps24	0.0378831	0.0300221	0.0303719	0.0239827	0.0399764	0.034498	0.0353934	0.0322287	0.0305649	0.0355241	-0.0049592	0.029628	Down	No	No
Kitl	0.00113001	0.00938638	0.000989501	0.00137151	0.00225544	0.0164599	0.00829112	0.00545161	0.00321935	0.00811451	-0.00489516	0.043616	Down	No	No
Med8	0.0432568	0.0392157	0.0375315	0.0359011	0.0452581	0.0474852	0.0421147	0.0406215	0.0389763	0.0438699	-0.00489358	0.031977	Down	No	No
Rap2c	0.00503519	0.00513805	0.00281973	0.00633961	0.00761667	0.0119134	0.00950513	0.00982895	0.00483315	0.00971603	-0.00488288	0.020367	Down	No	No
Dpp7	0.0139268	0.0111757	0.0063332	0.00976177	0.0224237	0.015145	0.0107902	0.0123262	0.0102994	0.0151713	-0.00487193	0.031443	Down	No	No
Adck4	0.00987074	0.00751553	0.0194165	0.0155354	0.0132813	0.0137086	0.0231313	0.0216038	0.0130845	0.0179312	-0.00484671	0.007367	Down	No	No
1810022K09Rik	0.0205077	0.018855	0.00774702	0.0167159	0.0294594	0.0212953	0.0122512	0.0199412	0.0159564	0.0207368	-0.00478036	0.04616	Down	No	No
Rragd	0.0257145	0.015591	0.0129241	0.0153248	0.0319426	0.02251	0.0155682	0.018293	0.0173886	0.0220785	-0.00468984	0.023597	Down	No	No
Gid8	0.0494057	0.0510142	0.0507623	0.0598464	0.056555	0.0558123	0.0561799	0.0612149	0.0527572	0.0574405	-0.00468336	0.030622	Down	No	No
Cd93	0.000277433	0.0360384	0.0056397	0.00486724	0.00137964	0.0420832	0.0127229	0.00921914	0.0117057	0.0163512	-0.00464553	0.038054	Down	No	No
Irak2	0.00497513	0.00701594	0.0043583	0.00586972	0.0112516	0.0112889	0.00640746	0.0113835	0.00555477	0.0100829	-0.00452808	0.016251	Down	No	No
B4galt7	0.0116487	0.00970714	0.00579326	0.0101083	0.0149547	0.0135509	0.014112	0.0124917	0.00931435	0.0137773	-0.00446299	0.043062	Down	No	No
Pwwp2b	0.0016035	0.00241676	0.00205592	0.0046615	0.00509513	0.00884775	0.00394241	0.0104756	0.00268442	0.00709023	-0.00440581	0.024799	Down	No	No
Golm1	0.0213324	0.0178588	0.022235	0.0219104	0.0234921	0.024328	0.0254919	0.0273342	0.0208341	0.0251616	-0.00432742	0.021825	Down	No	No
Med17	0.0119445	0.00915818	0.0121568	0.0160841	0.0158301	0.014533	0.016356	0.019464	0.0123359	0.0165458	-0.00420986	0.002164	Down	No	No
Apitd1	0.00949921	0.00693599	0.0120499	0.0137448	0.0133006	0.00953688	0.014692	0.0213646	0.0105575	0.0147235	-0.00416606	0.038987	Down	No	No
Vcpip1	0.0208023	0.0176562	0.0291921	0.0206265	0.0233229	0.0233756	0.0343528	0.0238417	0.0220693	0.0262232	-0.00415397	0.01223	Down	No	No
Mettl5	0.0156356	0.0153064	0.0213182	0.0128296	0.0182257	0.0170094	0.0276856	0.0187545	0.0162724	0.0204188	-0.00414635	0.03844	Down	No	No
1500004A13Rik	0.041185	0.024511	0.0371531	0.0341877	0.0426996	0.0298005	0.0435983	0.037514	0.0342592	0.0384031	-0.00414392	0.031766	Down	No	No
1700123O20Rik	0.0166412	0.0153978	0.0171482	0.0127844	0.0191011	0.0197113	0.01946	0.0201806	0.0154929	0.0196133	-0.00412038	0.039985	Down	No	No
Vipr1	0.00687454	0.00502596	0.00351186	0.00709508	0.0124484	0.00980012	0.00686559	0.00985854	0.00562686	0.00974317	-0.00411631	0.007728	Down	No	No
Dnal4	0.0158976	0.0199229	0.0140998	0.0181242	0.0201114	0.0244005	0.0166069	0.0229918	0.0170111	0.0210276	-0.00401652	0.004532	Down	No	No
Apobec3	0.0205739	0.0235918	0.0246811	0.0289138	0.0265823	0.0295779	0.0258984	0.0316451	0.0244402	0.0284259	-0.00398577	0.045176	Down	No	No
1600012H06Rik	0.0231622	0.0213129	0.0228086	0.0248763	0.0244442	0.0275399	0.0268873	0.0291456	0.02304	0.0270043	-0.00396428	0.029991	Down	No	No
Nprl2	0.0108662	0.0126343	0.0133327	0.011678	0.0122927	0.0164502	0.0194381	0.0159436	0.0121278	0.0160311	-0.00390337	0.027019	Down	No	No
Cx3cl1	0.00619232	0.0115129	0.00713355	0.0111143	0.0118304	0.0155945	0.0117265	0.0123962	0.00898826	0.0128869	-0.00389865	0.024785	Down	No	No
2810408A11Rik	0.00731157	0.00568659	0.00925236	0.00624686	0.0111613	0.00838099	0.0133627	0.0110685	0.00712435	0.0109934	-0.00386904	0.003146	Down	No	No
Ndufs7	0.0462737	0.0330296	0.0328737	0.0312163	0.049662	0.037635	0.0342966	0.0372676	0.0358483	0.0397153	-0.00386696	0.029012	Down	No	No
Zbtb8os	0.0180152	0.0175386	0.00990611	0.0138255	0.0200793	0.019881	0.0149557	0.019806	0.0148214	0.0186805	-0.00385914	0.028911	Down	No	No
Vopp1	0.00840896	0.0102612	0.00840223	0.0110356	0.0115632	0.0171852	0.00997039	0.0147599	0.00952702	0.0133697	-0.00384266	0.041874	Down	No	No
Vmn1r4	0.00217099	0.00749187	0.00364883	0.00479101	0.007626	0.00843193	0.00659174	0.0106013	0.00452568	0.00831275	-0.00378707	0.045337	Down	No	No
Tsta3	0.0291292	0.0335835	0.0214193	0.0255782	0.0332101	0.0372452	0.0262725	0.0281111	0.0274276	0.0312097	-0.00378217	0.004367	Down	No	No
Pafah2	0.00592085	0.00432608	0.00528064	0.00534533	0.0086816	0.00902866	0.00764977	0.0106415	0.00521823	0.00900038	-0.00378215	0.013313	Down	No	No
Sgcz	0.0412784	0.0220255	0.0524552	0.0418296	0.0446242	0.0253267	0.0590772	0.0435653	0.0393972	0.0431484	-0.00375119	0.035484	Down	No	No
Hmbs	0.0361653	0.0255466	0.0393478	0.0360223	0.0401767	0.0305949	0.0419356	0.0392721	0.0342705	0.0379948	-0.00372431	0.00587	Down	No	No
Spdl1	0.000330696	0.00170851	0.0117248	0.00571202	0.000877651	0.00657311	0.0158877	0.0109442	0.00486901	0.00857065	-0.00370164	0.041102	Down	No	No
9430016H08Rik	0.0151178	0.0163788	0.0112578	0.0133181	0.0179782	0.0177544	0.016546	0.01831	0.0140181	0.0176472	-0.00362904	0.029521	Down	No	No
Ift140	0.0178018	0.0143733	0.0134556	0.016526	0.0234564	0.0163409	0.0155365	0.0212522	0.0155392	0.0191465	-0.00360731	0.030664	Down	No	No
Myg1	0.016274	0.0117687	0.0178038	0.0145167	0.0171809	0.0168801	0.021946	0.0187574	0.0150908	0.0186911	-0.00360029	0.029974	Down	No	No
Mea1	0.00692444	0.0060105	0.00925394	0.00492283	0.0126046	0.00645411	0.0132753	0.00913302	0.00677793	0.0103667	-0.00358881	0.048312	Down	No	No
Paqr8	0.00692246	0.00618778	0.00298639	0.004125	0.0118085	0.00848614	0.00596973	0.00812148	0.00505541	0.00859646	-0.00354105	0.008323	Down	No	No
Mageb16	0.00528892	0.00591655	0.00330801	0.00509998	0.00936092	0.0100762	0.00465967	0.00966128	0.00490337	0.00843952	-0.00353615	0.01715	Down	No	No
Cars	0.00927346	0.00488523	0.0135367	0.0161989	0.0147648	0.00840641	0.0181397	0.016637	0.0109736	0.014487	-0.00351341	0.049723	Down	No	No
Glipr2	0.00161126	0.00891988	0.000869601	0.00229485	0.00213303	0.0141631	0.00442176	0.00700081	0.0034239	0.00692966	-0.00350577	0.044984	Down	No	No
Nr1h2	0.0179323	0.0191711	0.00696028	0.016222	0.0208655	0.020095	0.01118	0.0221386	0.0150714	0.0185698	-0.00349836	0.04501	Down	No	No
Dolk	0.00851423	0.00635249	0.00726485	0.00798043	0.0127914	0.00995457	0.00955441	0.0114886	0.007528	0.0109473	-0.00341925	0.003712	Down	No	No
Timm44	0.0202941	0.0224421	0.018717	0.0215928	0.0244594	0.0239944	0.0246824	0.0234794	0.0207615	0.0241539	-0.00339237	0.046596	Down	No	No
Coa7	0.015031	0.0137324	0.0161458	0.0129535	0.0184261	0.0189896	0.0176886	0.0161384	0.0144657	0.0178107	-0.00334498	0.021763	Down	No	No
Stoml2	0.0119688	0.0156448	0.0147571	0.0186117	0.0178424	0.0180643	0.0162858	0.0221476	0.0152456	0.018585	-0.00333941	0.037932	Down	No	No
P4ha2	0.0066461	0.0076506	0.0144718	0.0126044	0.00872442	0.00974912	0.0195525	0.0166988	0.0103432	0.0136812	-0.003338	0.021048	Down	No	No
Dvl2	0.0111612	0.0131986	0.00848801	0.0146378	0.0156743	0.015994	0.0129488	0.0160008	0.0118714	0.0151545	-0.00328308	0.022394	Down	No	No
Smpd2	0.0371641	0.0256984	0.0229525	0.023462	0.0408618	0.0279824	0.0286493	0.024898	0.0273192	0.0305979	-0.00327867	0.03889	Down	No	No
Slc38a9	0.0251507	0.0234547	0.0218504	0.0323378	0.0312347	0.0255074	0.0239617	0.0351259	0.0256984	0.0289574	-0.00325903	0.042219	Down	No	No
Nop16	0.0163357	0.0203393	0.0159477	0.0181372	0.0178869	0.0236251	0.0213524	0.0206373	0.01769	0.0208754	-0.00318545	0.030255	Down	No	No
Cep128	0.00910819	0.0118936	0.0344124	0.0325913	0.0140091	0.015975	0.0361859	0.0345538	0.0220014	0.025181	-0.0031796	0.026317	Down	No	No
Rnf40	0.0093556	0.0119929	0.011547	0.0139604	0.0136015	0.0125693	0.0155154	0.017783	0.011714	0.0148673	-0.00315335	0.035456	Down	No	No
Phc3	0.023288	0.0252866	0.0169358	0.0236745	0.0273277	0.0288256	0.0206714	0.0249724	0.0222962	0.0254493	-0.00315309	0.015144	Down	No	No
Il15ra	0.00116497	0.00300146	0.00310007	0.00475184	0.0030469	0.00600536	0.00695188	0.00858069	0.00300458	0.00614621	-0.00314162	0.00658	Down	No	No
Strn	0.0209872	0.0179118	0.0186787	0.0202333	0.0231033	0.0197754	0.0216373	0.0258191	0.0194528	0.0225838	-0.00313103	0.034807	Down	No	No
Maoa	0.00348809	0.0100861	0.00389225	0.00497364	0.00488506	0.0141865	0.00730337	0.00858068	0.00561002	0.0087389	-0.00312888	0.013409	Down	No	No
Pxylp1	0.0110144	0.0115231	0.0119644	0.0109905	0.0133495	0.0136014	0.0159969	0.014766	0.0113731	0.0144285	-0.00305534	0.008593	Down	No	No
Npr1	0.000388312	0.00790322	0.00205238	0.00455406	0.00471774	0.00979337	0.00691537	0.00559845	0.00372449	0.00675623	-0.00303174	0.046657	Down	No	No
Zfp738	0.00185532	0.00300543	0.006117	0.00432321	0.00579747	0.00761986	0.00748233	0.00602543	0.00382524	0.00673127	-0.00290603	0.036756	Down	No	No
Cd48	0.0010983	0.000349934	0.00165017	0.00216686	0.00191302	0.00417476	0.00380696	0.00684943	0.00131632	0.00418604	-0.00286973	0.04481	Down	No	No
Rab9	0.0103449	0.0148683	0.0125992	0.0151304	0.0137372	0.0172514	0.0150493	0.0183608	0.0132357	0.0160997	-0.00286399	0.001617	Down	No	No
Rgl1	0.0266935	0.0242071	0.0230805	0.0211471	0.0279718	0.0281424	0.0256276	0.0248303	0.0237821	0.026643	-0.00286096	0.018146	Down	No	No
Arid5a	0.00618965	0.00602027	0.00520786	0.00738994	0.00876923	0.00671065	0.00906532	0.0116498	0.00620193	0.00904875	-0.00284681	0.038217	Down	No	No
Yars2	0.00563341	0.00815445	0.00637344	0.00431757	0.00913497	0.00936798	0.00862803	0.00869988	0.00611972	0.00895772	-0.002838	0.02656	Down	No	No
2700038G22Rik	0.000886055	0.00386576	0.00296414	0.00462804	0.00255204	0.00532874	0.00800795	0.0075909	0.003086	0.00586991	-0.00278391	0.043048	Down	No	No
Calhm2	0.000570296	0.00496918	0.00292413	0.00311146	0.00386515	0.00775777	0.00682266	0.00411991	0.00289377	0.00564137	-0.00274761	0.021571	Down	No	No
Uqcrc2	0.0168592	0.00852326	0.0214305	0.0109434	0.0191333	0.0127179	0.0237396	0.0131019	0.0144391	0.0171732	-0.00273409	0.011224	Down	No	No
Ucp3	0.00562508	0.00313892	0.00445546	0.00362487	0.00759488	0.00599059	0.00572631	0.00825909	0.00421108	0.00689271	-0.00268163	0.034509	Down	No	No
Pvt1	0.00967599	0.00570556	0.00683457	0.00519729	0.0104514	0.0078401	0.00982697	0.00985218	0.00685335	0.00949265	-0.0026393	0.047536	Down	No	No
Sike1	0.0368595	0.0383071	0.0269936	0.0307772	0.0391769	0.0398926	0.0298943	0.0344764	0.0332344	0.03586	-0.00262567	0.009878	Down	No	No
Lsm10	0.0174152	0.0187639	0.0150754	0.0158582	0.020069	0.0223038	0.0178442	0.0173755	0.0167782	0.0193981	-0.00261997	0.008126	Down	No	No
Adcy7	0.00107	0.00440948	0.00344401	0.00241547	0.00350649	0.00816217	0.00441892	0.00564137	0.00283474	0.00543224	-0.0025975	0.02321	Down	No	No
Nxt2	0.00605706	0.00590351	0.00681256	0.00894361	0.00867454	0.0086942	0.0096853	0.0108279	0.00692918	0.00947049	-0.00254131	0.001495	Down	No	No
Mansc1	0.00345787	0.00248749	0.00177761	0.00369867	0.00436548	0.00670238	0.0050062	0.00548704	0.00285541	0.00539027	-0.00253486	0.041212	Down	No	No
Cmpk2	0.0125586	0.0110873	0.0160212	0.0156015	0.0162413	0.0118894	0.0197165	0.0174363	0.0138171	0.0163209	-0.00250375	0.03959	Down	No	No
Acacb	0.000734057	0.00165687	0.00171394	0.00161784	0.00240531	0.00573922	0.00289835	0.00435164	0.00143068	0.00384863	-0.00241795	0.032786	Down	No	No
Pphln1	0.0496178	0.0369808	0.0437	0.0409055	0.0532315	0.0392797	0.0458226	0.0422237	0.042801	0.0451394	-0.00233836	0.016131	Down	No	No
Slf1	0.00423101	0.00369299	0.0129513	0.0086848	0.0056609	0.00610346	0.0172852	0.00985918	0.00739002	0.00972718	-0.00233716	0.047148	Down	No	No
Avpi1	0.00505994	0.00922084	0.00736695	0.00620231	0.00852046	0.0107894	0.00801088	0.00982577	0.00696251	0.00928662	-0.00232411	0.049763	Down	No	No
Dok7	0.00781754	0.00559237	0.00390977	0.00474548	0.011926	0.00687917	0.00671016	0.00583504	0.00551629	0.00783759	-0.0023213	0.0464	Down	No	No
Ankrd36	0.00196696	0.000377112	0.000704373	0.00224866	0.00383762	0.0032732	0.00309738	0.00416647	0.00132428	0.00359367	-0.00226939	0.002505	Down	No	No
Ppp2r5d	0.00417484	0.00368399	0.00732032	0.00748158	0.00619318	0.00540112	0.00857046	0.011294	0.00566518	0.0078647	-0.00219952	0.029427	Down	No	No
Tatdn2	0.0183863	0.0172634	0.0208606	0.0230254	0.0198016	0.02037	0.0241496	0.024011	0.0198839	0.0220831	-0.00219913	0.032794	Down	No	No
Hexb	0.00104873	0.00462207	0.00287415	0.00359537	0.00323405	0.00523541	0.00588346	0.00644316	0.00303508	0.00519902	-0.00216394	0.028809	Down	No	No
Cntrl	0.0115234	0.00993202	0.0228351	0.0208302	0.0138215	0.0134453	0.0251368	0.0212709	0.0162802	0.0184186	-0.00213848	0.043308	Down	No	No
Haus4	0.00278368	0.00844127	0.0195136	0.01723	0.00327016	0.0112599	0.0225885	0.0192941	0.0119921	0.0141032	-0.00211103	0.036164	Down	No	No
Traf3ip1	0.00580051	0.00626827	0.00559722	0.00770731	0.00729598	0.00842137	0.00872997	0.00932508	0.00634333	0.0084431	-0.00209977	0.011075	Down	No	No
Suv39h2	0.00168028	0.000940944	0.00555791	0.00508967	0.00321368	0.00410651	0.00715042	0.00713222	0.0033172	0.00540071	-0.00208351	0.011782	Down	No	No
Gm15922	0	0	0	4.70803e-05	0.00049879	0.00245146	0.00246152	0.00285105	1.17701e-05	0.00206571	-0.00205394	0.029641	Down	No	No
Gm29669	0.0391726	0.0347231	0.0518394	0.0268008	0.0410723	0.0357521	0.0536221	0.0301405	0.038134	0.0401468	-0.00201277	0.025097	Down	No	No
2700062C07Rik	0.00969792	0.00999874	0.0107944	0.011213	0.012857	0.0123775	0.0113566	0.0128453	0.010426	0.0123591	-0.00193306	0.039595	Down	No	No
Gpam	0.00349066	0.00199158	0.0034756	0.00386772	0.00647851	0.00314911	0.00586403	0.00503389	0.00320639	0.00513138	-0.00192499	0.024504	Down	No	No
Exd1	0.000583457	0.00153571	0.00197399	0.00158697	0.00281713	0.00194179	0.00382026	0.00479416	0.00142003	0.00334334	-0.0019233	0.04541	Down	No	No
Pdpr	0.0124049	0.00992146	0.013366	0.0129111	0.0154057	0.011479	0.0160004	0.0133473	0.0121509	0.0140581	-0.00190723	0.045771	Down	No	No
Gm5069	0.0107689	0.00970503	0.00832024	0.00953802	0.0123129	0.0108667	0.0112169	0.0115589	0.00958305	0.0114889	-0.0019058	0.014624	Down	No	No
Slc35e3	0.00450547	0.00355806	0.00394406	0.00411116	0.00553172	0.00707652	0.00497415	0.00608104	0.00402969	0.00591586	-0.00188617	0.048952	Down	No	No
Gm28526	0.00337813	0.00217703	0.00210835	0.00185987	0.00577467	0.00294962	0.00463394	0.00357913	0.00238085	0.00423434	-0.00185349	0.019104	Down	No	No
1500002F19Rik	0.00381351	0.00202872	0.00684773	0.00598553	0.00553704	0.00295866	0.00895842	0.00845542	0.00466887	0.00647738	-0.00180851	0.01195	Down	No	No
9030624G23Rik	0.00585299	0.00130873	0.00303642	0.00511113	0.00645596	0.00349194	0.00530104	0.00720849	0.00382732	0.00561436	-0.00178704	0.020358	Down	No	No
Ube2l6	0.00107163	0.00281001	0.000179237	0.00289716	0.0026717	0.00474249	0.00133079	0.00534614	0.00173951	0.00352278	-0.00178327	0.007327	Down	No	No
Fancf	0.00731288	0.00711948	0.00557864	0.00941327	0.00939518	0.00798502	0.00861525	0.0104263	0.00735607	0.00910545	-0.00174938	0.040998	Down	No	No
Gm11476	0.00196522	0.000453288	0.00298523	0.00402764	0.00327029	0.00254561	0.00555492	0.00503469	0.00235785	0.00410138	-0.00174353	0.016564	Down	No	No
Gm13561	0.000641858	0.00067569	0.00122617	0.0023008	0.00185108	0.0035408	0.0019555	0.00434697	0.00121113	0.00292359	-0.00171246	0.035827	Down	No	No
Gimap6	0	0.0173389	0.00103856	0.00144708	0.00115826	0.0203836	0.00301908	0.00206451	0.00495614	0.00665635	-0.00170022	0.048694	Down	No	No
Katnb1	0.00694552	0.0107506	0.0062828	0.0108647	0.00953901	0.0121476	0.00664582	0.0131413	0.00871089	0.0103684	-0.00165753	0.045264	Down	No	No
Epha1	0.000289142	0.00434284	0.00231783	0.00891121	0.00162132	0.00622558	0.00408658	0.0105496	0.00396526	0.00562077	-0.00165551	0.000801	Down	No	No
Pomk	0.00462806	0.00698326	0.00227543	0.00298515	0.00622905	0.00777889	0.00356738	0.00587177	0.00421797	0.00586177	-0.0016438	0.034664	Down	No	No
Scml2	0	0.000262384	0.00182633	0.00191753	0.000643023	0.00200481	0.00331216	0.00450795	0.00100156	0.00261699	-0.00161542	0.027467	Down	No	No
Gm16010	0.000905141	0.000780655	0.000562211	0.000934355	0.00301391	0.00295614	0.00250809	0.00114317	0.00079559	0.00240533	-0.00160973	0.041555	Down	No	No
Med12l	0.0137322	0.00948855	0.0213272	0.0182412	0.0141897	0.0113984	0.0235407	0.0200336	0.0156973	0.0172906	-0.00159332	0.026271	Down	No	No
Ccdc142os	0.00189921	6.37073e-05	0.000316821	0.00124777	0.00277098	0.00245378	0.0026578	0.00200133	0.000881877	0.00247097	-0.0015891	0.038415	Down	No	No
Sec14l4	0.00108563	0.000408483	0.00152351	0.00197272	0.00319716	0.00280871	0.00216841	0.00309628	0.00124759	0.00281764	-0.00157006	0.031859	Down	No	No
Zfp931	0.00229602	0.00206942	0.000175742	0.00229638	0.00460076	0.00416505	0.00172715	0.00260013	0.00170939	0.00327327	-0.00156388	0.039974	Down	No	No
Gpr63	0.000983614	0.000169397	0.00119706	0.00146898	0.0018742	0.00104481	0.00399761	0.00313904	0.000954764	0.00251392	-0.00155915	0.041309	Down	No	No
Wdr66	0.00346276	0.00130964	0.00131367	0.000199089	0.00457996	0.00309131	0.00192977	0.00285641	0.00157129	0.00311436	-0.00154307	0.039629	Down	No	No
Tfdp1	0.00112362	0.00217045	0.00317891	0.00259433	0.00305571	0.00367424	0.00479375	0.00368654	0.00226683	0.00380256	-0.00153573	0.003027	Down	No	No
Ms4a6d	0	0.00180895	0.000570002	0.000433105	0.000105645	0.00368425	0.0025981	0.00251856	0.000703015	0.00222664	-0.00152362	0.048953	Down	No	No
BC064078	0	0.000205621	0	0.000347758	0.00142728	0.00139457	0.00112049	0.0025232	0.000138345	0.00161638	-0.00147804	0.008777	Down	No	No
Raver2	0.00167211	0.000538583	0.000725312	0.00158078	0.00211004	0.00284185	0.00214478	0.00319216	0.0011292	0.00257221	-0.00144301	0.033153	Down	No	No
Efna4	0	0	0	0.000488533	0.000381455	0.00214116	0.00101118	0.00245617	0.000122133	0.00149749	-0.00137536	0.045039	Down	No	No
Mmgt2	0.0141537	0.00543105	0.014987	0.0112067	0.0148359	0.00680233	0.0162415	0.013397	0.0114446	0.0128192	-0.00137457	0.021462	Down	No	No
Pwp2	0.00347981	0.00733074	0.00334889	0.00624913	0.00559312	0.00782723	0.00532256	0.00712196	0.00510214	0.00646622	-0.00136407	0.04236	Down	No	No
Chrna7	0.000664035	0.000258736	0.00180747	0.000853459	0.00248633	0.0021757	0.00239144	0.0018536	0.000895926	0.00222676	-0.00133084	0.025888	Down	No	No
A430010J10Rik	0.000423018	0.000158358	0.0019995	0.0013049	0.00102386	0.00184834	0.00393115	0.00240386	0.000971444	0.00230181	-0.00133036	0.021222	Down	No	No
Fam122b	0.00361212	0.00143423	0.00563556	0.0031257	0.00395491	0.0032823	0.00713432	0.0046889	0.0034519	0.00476511	-0.0013132	0.028886	Down	No	No
Mocos	0.00583201	0.00429235	0.00248335	0.00277321	0.00674384	0.0054192	0.00454117	0.00386502	0.00384523	0.00514231	-0.00129708	0.015145	Down	No	No
Psmc3ip	0.000367486	0.000488038	0.00436922	0.00464886	0.00113223	0.00209204	0.0059085	0.00590764	0.0024684	0.0037601	-0.0012917	0.006592	Down	No	No
Slc2a3	0.00148072	0.00282879	0.000646878	0.0010663	0.00215373	0.00510409	0.00125927	0.00259667	0.00150567	0.00277844	-0.00127277	0.048352	Down	No	No
Gxylt2	0.00163941	0.000637193	0.00161833	0.000865729	0.00238585	0.00248997	0.00327608	0.00168205	0.00119017	0.00245849	-0.00126832	0.020969	Down	No	No
Cfb	0	0.000870562	0.00159529	0.00235872	0.000479962	0.00233989	0.00321801	0.00377604	0.00120614	0.00245347	-0.00124733	0.017139	Down	No	No
Spic	0.000145912	0.000785379	9.68583e-05	0.00042914	0.00119769	0.00171549	0.000949578	0.00242252	0.000364322	0.00157132	-0.001207	0.019907	Down	No	No
Cfap70	0.0022513	0.000922079	0.00106249	0.000296986	0.00388536	0.00141724	0.00180925	0.00215151	0.00113321	0.00231584	-0.00118263	0.037599	Down	No	No
Nlrp1b	0.000325169	0	0.00014472	0.000447014	0.00124001	0.000523288	0.00134215	0.00248456	0.000229225	0.0013975	-0.00116828	0.035804	Down	No	No
6030407O03Rik	0.0020448	0.000734836	0.00106164	0.00170335	0.00385837	0.00113947	0.00186798	0.00322252	0.00138616	0.00252208	-0.00113593	0.038965	Down	No	No
Sgcg	0	0.000662939	0.0012682	0.000211929	0.00110047	0.0015511	0.0020666	0.00193624	0.000535768	0.0016636	-0.00112784	0.012397	Down	No	No
Glp2r	0.00334511	0.00102185	0.000694523	0.00151355	0.00377689	0.00248163	0.00165739	0.00315852	0.00164376	0.00276861	-0.00112485	0.025729	Down	No	No
Sec14l2	0.00123938	0.00354054	0.000841508	0.00263994	0.00308737	0.00455468	0.00194705	0.00303966	0.00206534	0.00315719	-0.00109185	0.034778	Down	No	No
Lin28b	0.00128641	0.000276037	0.00140504	0.000972845	0.00275396	0.00156019	0.00213288	0.00183534	0.000985084	0.00207059	-0.00108551	0.008312	Down	No	No
Fam228a	0.00659726	0.00842563	0.00518973	0.0112443	0.00844876	0.00975138	0.00568309	0.0118995	0.00786423	0.00894568	-0.00108144	0.041046	Down	No	No
Baiap2l2	0.00169298	0.000936883	0.000951366	0.0023306	0.00257688	0.00218986	0.00217359	0.00329145	0.00147796	0.00255794	-0.00107999	0.00136	Down	No	No
Tinf2	0.00186214	0.00329979	0.00785024	0.00583491	0.00298814	0.00448791	0.00829432	0.00729499	0.00471177	0.00576634	-0.00105457	0.01644	Down	No	No
4933415A04Rik	0.000888629	0.00108732	0.000236952	0.00125883	0.00142064	0.00234188	0.00102471	0.0028987	0.000867932	0.00192148	-0.00105355	0.023414	Down	No	No
Thrsp	0	9.1719e-05	0.000526485	0.00068739	0.000167713	0.00140477	0.0021535	0.00176103	0.000326398	0.00137175	-0.00104536	0.044636	Down	No	No
Tjp3	0.00243968	0.00358573	0.00178234	0.00364483	0.00426542	0.0043831	0.00283144	0.00411848	0.00286315	0.00389961	-0.00103646	0.036903	Down	No	No
Itga10	0	0.00123656	0.000908191	0.00178165	0.000533694	0.00197148	0.00248259	0.00303752	0.000981602	0.00200632	-0.00102472	0.023145	Down	No	No
Trpc6	0.0014251	0.00810527	0.00107099	0.000694684	0.00201657	0.00883531	0.00256186	0.00187264	0.00282401	0.00382159	-0.000997581	0.01692	Down	No	No
Oxsm	0.00235561	0.00326277	0.00197131	0.0024712	0.00350486	0.00347675	0.0033079	0.00366619	0.00251522	0.00348893	-0.000973701	0.03205	Down	No	No
1500017E21Rik	0.00254633	0.00081669	0	0.00171268	0.00290104	0.0024318	0.000713984	0.0027024	0.00126893	0.00218731	-0.000918382	0.040897	Down	No	No
Chst5	0.00198292	0.000365756	0.00274087	0.00119884	0.00221297	0.00136155	0.00376436	0.00260935	0.0015721	0.00248706	-0.000914962	0.034218	Down	No	No
Eaf2	0.00128032	0.00138041	0.00245523	0.00168681	0.00185846	0.0020367	0.00400294	0.00254132	0.00170069	0.00260986	-0.000909164	0.025913	Down	No	No
Nmrk1	0.00325414	0.00599169	0.00437437	0.00399586	0.00466981	0.00627455	0.00524875	0.0049667	0.00440401	0.00528995	-0.000885937	0.03195	Down	No	No
Tab3	0.00645151	0.00914369	0.00715072	0.00674594	0.00767309	0.00937892	0.00788531	0.00763209	0.00737296	0.00814236	-0.000769391	0.033095	Down	No	No
Fndc7	0.00110962	0.00408071	0.00146373	0.00130626	0.00224258	0.00491922	0.00172229	0.00199648	0.00199008	0.00272014	-0.000730061	0.027922	Down	No	No
Gm29427	0.00116286	0.000263155	0.0061358	0.00142254	0.00143697	0.000894715	0.00739662	0.00197065	0.00224609	0.00292474	-0.000678651	0.047346	Down	No	No
Gm17315	0	0.00138003	0.000138415	0.00104051	0.000480069	0.00209257	0.00117331	0.00128232	0.000639738	0.00125707	-0.00061733	0.035612	Down	No	No
Ndnf	0.000429622	0.000646208	0.00022067	0.00112611	0.000648321	0.00117263	0.000878255	0.00210152	0.000605653	0.00120018	-0.000594528	0.032293	Down	No	No
Gm21865	0.00166347	0.00123074	0.00113858	0.000491855	0.00212493	0.00187512	0.00145536	0.00123032	0.00113116	0.00167143	-0.00054027	0.010511	Down	No	No
Abca17	0.00110964	0	0.000314495	0.00107291	0.00201305	0.000292969	0.000822027	0.00146726	0.000624261	0.00114883	-0.000524566	0.029404	Down	No	No
Etohd2	0.00543342	0.00441905	0.00676207	0.00680247	0.0063323	0.00461263	0.00717735	0.00737855	0.00585425	0.00637521	-0.000520956	0.039112	Down	No	No
Gm10036	0.00408643	0.00290454	0.00244931	0.00104358	0.00443253	0.00312723	0.00262868	0.00162503	0.00262096	0.00295337	-0.000332405	0.034514	Down	No	No
Rfpl4	0.000218172	0.000477901	0.000321936	0.00285921	0.000365463	0.000747827	0.000585508	0.00306452	0.000969306	0.00119083	-0.000221524	0.00455	Down	No	No
Tmem202	0.00299853	0.00117755	0.000998914	0.000505955	0.00282876	0.00103093	0.000554229	0.000338535	0.00142024	0.00118812	0.000232122	0.0469	Up	No	No
Akr1c18	0.00142888	8.92533e-05	0.000565454	0.00210064	0.000963456	3.25233e-05	0	0.00141826	0.00104606	0.00060356	0.000442497	0.04736	Up	No	No
1700028M03Rik	0.00622034	0.000580556	0.00449032	0.00253563	0.00580741	0.000459932	0.00389999	0.00187958	0.00345671	0.00301173	0.000444983	0.033764	Up	No	No
Usp9y	0.00222935	0.000945172	0.00110568	0.00185708	0.00162795	0.000497677	0.000969626	0.00121006	0.00153432	0.00107633	0.000457991	0.028668	Up	No	No
Tbc1d10c	0.00237306	0.00184156	0.00107171	0.00192205	0.00170446	0.00122323	0.000716691	0.00122154	0.00180209	0.00121648	0.000585614	0.005021	Up	No	No
Gm28050	0.00277755	0.00086698	0.00179052	0.00226289	0.00228895	0.000208529	0.00106427	0.00174231	0.00192448	0.00132602	0.000598467	0.001778	Up	No	No
Gm43278	0.00182065	0.00276737	0.00111325	0.000792807	0.00112422	0.00228039	0.000286115	0.000361962	0.00162352	0.00101317	0.000610345	0.006997	Up	No	No
4930552P12Rik	0.00281762	0.00149695	0.00157151	0.00236073	0.00240403	0.000899098	0.000666342	0.00150533	0.0020617	0.0013687	0.000693002	0.00915	Up	No	No
4930429D17Rik	0.00200559	0.00162292	0.00106861	0.00160366	0.000988414	0.000945886	0.000882358	0.000381832	0.00157519	0.000799622	0.000775573	0.041537	Up	No	No
Cyp2c38	0.00223999	0.000606506	0.000682319	0.000883289	0.00100943	3.72897e-05	0	0.000252706	0.00110303	0.000324857	0.000778168	0.014602	Up	No	No
BC046251	0.00138597	0.00168247	0.00101002	0.00253721	0	0.00092984	0.00074284	0.00176981	0.00165392	0.000860622	0.000793296	0.040668	Up	No	No
4932414N04Rik	0.00277524	0.00134848	0.0013475	0.0011384	0.0019095	0.000271661	0.000851434	0.000231087	0.0016524	0.00081592	0.000836485	0.006344	Up	No	No
1700023H06Rik	0.00112007	0.000924802	0.00269694	0.00147616	0.000315289	0.000150266	0.00122299	0.00113638	0.00155449	0.000706229	0.000848265	0.036096	Up	No	No
Leng9	0.00801246	0.00746301	0.00508042	0.0106233	0.00685601	0.00668315	0.00420294	0.009936	0.0077948	0.00691953	0.000875279	0.003271	Up	No	No
Vwa3a	0.00448183	0.00220356	0.00274064	0.0025266	0.00389392	0.00104665	0.00231356	0.00104224	0.00298816	0.00207409	0.000914071	0.03403	Up	No	No
Gm26908	0.0021707	0.00207747	0.000734158	0.00241712	0.00116995	0.000741348	0.000363915	0.00140217	0.00184986	0.000919346	0.000930518	0.019296	Up	No	No
4921513I03Rik	0.00277521	0.00170384	0.00412382	0.000256565	0.00161073	0.000799133	0.00259568	0	0.00221486	0.00125139	0.000963474	0.036863	Up	No	No
Sidt1	0.0038721	0.00317528	0.00101509	0.00431973	0.00339535	0.00183347	0.000451138	0.00249849	0.00309555	0.00204461	0.00105094	0.047035	Up	No	No
Rab9b	0.00277468	0.00283723	0.00368382	0.0027536	0.000837471	0.00229465	0.00263492	0.00198564	0.00301233	0.00193817	0.00107416	0.039187	Up	No	No
Dmkn	0.00353644	0.0011393	0.00245978	0.0024329	0.00205947	0.000612865	0.00123223	0.00132066	0.0023921	0.00130631	0.0010858	0.012527	Up	No	No
Serpinb7	0.00217143	0.000805864	0.00143004	0.00107427	0.000525496	0.000319659	0.000194698	7.68903e-05	0.0013704	0.000279186	0.00109121	0.020421	Up	No	No
Ifi44	0.00269901	0.00239475	0.00164419	0.00043993	0.00119173	0.00114051	0.000264883	0.000203733	0.00179447	0.000700214	0.00109426	0.032793	Up	No	No
Cldn5	0.00117218	0.0166534	0.00123934	0.00146978	0.000359733	0.0151418	0.000597381	0	0.00513367	0.00402473	0.00110894	0.015684	Up	No	No
Gfer	0.0156244	0.0118101	0.0119079	0.00932902	0.0141058	0.0115375	0.0103264	0.00815694	0.0121679	0.0110316	0.00113623	0.032699	Up	No	No
Nox1	0.00670029	0.00335786	0.00574161	0.00819822	0.00491172	0.00269795	0.00406384	0.0077556	0.00599949	0.00485728	0.00114222	0.045334	Up	No	No
Gm15594	0.000874904	0.00358232	0.00321117	0.00314807	0	0.00228935	0.00235493	0.00160051	0.00270411	0.0015612	0.00114292	0.006531	Up	No	No
Psma8	0.00240597	0.00234657	0.00298387	0.00109325	0.00070803	0.00145986	0.00128461	0.000731363	0.00220741	0.00104597	0.00116145	0.038343	Up	No	No
Cyp4b1	0.0016271	0.00516308	0.00184881	0.001524	0.000310762	0.00369818	0.00058027	0.000882548	0.00254074	0.00136794	0.00117281	0.007592	Up	No	No
Nadsyn1	0.0025512	0.00299904	0.00442816	0.00339292	0.001892	0.00210939	0.00317693	0.00149332	0.00334283	0.00216791	0.00117492	0.022552	Up	No	No
Ly96	0.00801082	0.0029498	0.0045977	0.00615267	0.0071665	0.00223648	0.00271096	0.00457958	0.00542775	0.00417338	0.00125436	0.021366	Up	No	No
Trp63	0.00345214	0.00313856	0.0020576	0.0021664	0.00221845	0.00158573	0.00133906	0.000598341	0.00270368	0.00143539	0.00126828	0.007782	Up	No	No
Fbxw15	0.00385075	0.0020144	0.00381056	0.0020633	0.00334869	0.000995272	0.00142407	0.000870364	0.00293475	0.0016596	0.00127515	0.049349	Up	No	No
Zbtb26	0.00473564	0.00512609	0.00344807	0.00224252	0.00283025	0.00381154	0.00228895	0.00139917	0.00388808	0.00258247	0.0013056	0.009893	Up	No	No
Atxn7l2	0.00679975	0.00577521	0.00353165	0.00586979	0.00492184	0.00408631	0.00287043	0.00475568	0.0054941	0.00415856	0.00133554	0.017023	Up	No	No
Dalrd3	0.00140074	0.00349023	0.00186297	0.00140409	0.000756793	0.00105968	0.000622006	0.000221544	0.00203951	0.000665005	0.0013745	0.035532	Up	No	No
Wdr31	0.010389	0.00839018	0.00945504	0.00961888	0.00841777	0.00666308	0.0077557	0.00945618	0.00946329	0.00807318	0.00139011	0.043693	Up	No	No
Gm26615	0.00646849	0.00556922	0.00357866	0.0048123	0.00503883	0.0032672	0.0027157	0.00361872	0.00510717	0.00366011	0.00144706	0.018218	Up	No	No
Tmem69	0.00403517	0.00267088	0.00307765	0.00299843	0.00145111	0.00213904	0.00145463	0.00192623	0.00319553	0.00174275	0.00145278	0.045146	Up	No	No
Gm42890	0.00208484	0.00250838	0.00344818	0.000516514	0.000535298	0.00120165	0.000997879	0	0.00213948	0.000683707	0.00145577	0.035308	Up	No	No
Gm15698	0.00346698	0.00349733	0.00101448	0.00183538	0.00159858	0.000985813	0.000126047	0.00127804	0.00245354	0.000997121	0.00145642	0.047614	Up	No	No
Dmrtc1a	0.00899111	0.0142976	0.00308563	0.00825175	0.00717389	0.0125308	0.00251751	0.00656873	0.00865651	0.00719773	0.00145878	0.016342	Up	No	No
Nlrc3	0.00177691	0.00346509	0.00133655	0.00251348	0.000227645	0.00140344	0.000929707	0.000328337	0.00227301	0.000722281	0.00155073	0.031454	Up	No	No
Slc25a29	0.0107138	0.008026	0.0115345	0.00671655	0.00866673	0.0054377	0.0105531	0.00594942	0.00924772	0.00765175	0.00159597	0.034604	Up	No	No
Tekt2	0.0196078	0.0202437	0.00464877	0.00866438	0.0190648	0.01752	0.00314478	0.00700479	0.0132911	0.0116836	0.00160756	0.036771	Up	No	No
Gm20635	0.00395192	0.00285704	0.00193918	0.00333388	0.00113568	0.0010428	0.00112651	0.00174516	0.0030205	0.00126254	0.00175796	0.023768	Up	No	No
Dsc2	0.00729939	0.00537539	0.00983331	0.0101003	0.00475402	0.00494735	0.00755219	0.00832151	0.00815211	0.00639377	0.00175834	0.033519	Up	No	No
1700048O20Rik	0.00210522	0.00472415	0.000639067	0.00379756	0.000103326	0.00275205	0.000258982	0.000695762	0.0028165	0.000952529	0.00186397	0.044802	Up	No	No
4632404H12Rik	0.00693596	0.00849822	0.00639468	0.0061478	0.00505336	0.00544617	0.00533817	0.00457569	0.00699417	0.00510335	0.00189082	0.020832	Up	No	No
Dancr	0.00526292	0.00735769	0.0082331	0.00578155	0.0050072	0.00444153	0.00568812	0.00393491	0.00665882	0.00476794	0.00189087	0.048799	Up	No	No
A430105I19Rik	0.0141124	0.0148828	0.00987766	0.014043	0.0112432	0.0133988	0.00905674	0.0114511	0.0132289	0.0112875	0.00194147	0.026989	Up	No	No
Phc2	0.0810388	0.070602	0.0606351	0.0645706	0.0803282	0.0687809	0.0572966	0.0626445	0.0692116	0.0672625	0.00194908	0.03624	Up	No	No
Itgb3	0.00406056	0.00646381	0.00126001	0.00210357	0.00104946	0.00376405	0.000243775	0.000955445	0.00347199	0.00150318	0.0019688	0.03175	Up	No	No
Gm6602	0.0089157	0.00692482	0.00474691	0.00347654	0.00598011	0.00474493	0.0032009	0.00202795	0.00601599	0.00398847	0.00202752	0.009699	Up	No	No
Gm19590	0.00485314	0.00440694	0.00754295	0.00394798	0.00411861	0.00279564	0.00426945	0.00139534	0.00518775	0.00314476	0.00204299	0.034482	Up	No	No
Dvl3	0.013247	0.00759816	0.0117386	0.0121675	0.0103123	0.00673935	0.00946446	0.0098687	0.0111878	0.00909621	0.00209161	0.017496	Up	No	No
Sall2	0.00613323	0.00877165	0.00293802	0.00761627	0.0036582	0.00571539	0.00109885	0.00657295	0.00636479	0.00426135	0.00210345	0.016573	Up	No	No
Rnmtl1	0.0109773	0.00780328	0.0060053	0.00324452	0.00724635	0.00595842	0.00390616	0.00244748	0.0070076	0.0048896	0.00211799	0.039749	Up	No	No
Pcolce2	0.0073091	0.007845	0.0122657	0.0083794	0.00615459	0.00548218	0.00910551	0.00656346	0.0089498	0.00682644	0.00212337	0.015414	Up	No	No
Fsd1l	0.00946647	0.00431248	0.010478	0.00693326	0.00593203	0.00258845	0.00968337	0.00436284	0.00779756	0.00564167	0.00215589	0.034663	Up	No	No
Vars	0.019396	0.0176953	0.0177393	0.0142501	0.0156497	0.0160723	0.0153591	0.013303	0.0172702	0.015096	0.00217412	0.036192	Up	No	No
Nbeal2	0.0178034	0.0125406	0.0100778	0.0117705	0.017066	0.0101666	0.00634358	0.00989621	0.0130481	0.0108681	0.00217998	0.039186	Up	No	No
Mettl23	0.0172184	0.0201334	0.0181519	0.0169363	0.0160389	0.0165192	0.0151846	0.0158208	0.01811	0.0158909	0.00221916	0.039311	Up	No	No
Gzmm	0.00536338	0.00388803	0.00435381	0.00567589	0.00147623	0.00236718	0.00219538	0.00431473	0.00482028	0.00258838	0.0022319	0.030695	Up	No	No
Anapc15	0.00505464	0.00462718	0.00937972	0.00845093	0.00350987	0.00366673	0.00606861	0.00529161	0.00687812	0.00463421	0.00224391	0.031307	Up	No	No
Bik	0.0033206	0.00483538	0.00763041	0.00687286	0.00280874	0.0027445	0.0038732	0.00421676	0.00566481	0.0034108	0.00225401	0.044556	Up	No	No
Gdpd1	0.035594	0.0237821	0.0380183	0.0249876	0.0322338	0.0216194	0.0372089	0.0221451	0.0305955	0.0283018	0.00229373	0.025372	Up	No	No
Tmlhe	0.00825899	0.0108773	0.00676295	0.00897728	0.00442046	0.00920908	0.00433466	0.00697314	0.00871914	0.00623434	0.0024848	0.013787	Up	No	No
Kctd21	0.00336659	0.00891525	0.00525281	0.00636298	0.00296376	0.00560223	0.0026417	0.002659	0.00597441	0.00346667	0.00250774	0.042395	Up	No	No
Tsr2	0.0161068	0.0219155	0.016307	0.0254887	0.0118622	0.0204772	0.0152381	0.0221841	0.0199545	0.0174404	0.00251412	0.044938	Up	No	No
Sybu	0.0120279	0.00915628	0.0087402	0.00925075	0.00727772	0.0066972	0.00673161	0.0081318	0.00979378	0.00720958	0.0025842	0.044408	Up	No	No
5430405H02Rik	0.0135928	0.0105492	0.0147844	0.0145087	0.0107711	0.00915561	0.012676	0.0103291	0.0133588	0.010733	0.00262584	0.021549	Up	No	No
Tnfaip8l3	0.00737402	0.00577288	0.00909896	0.00259697	0.00498405	0.00129661	0.00700019	0.00104874	0.00621071	0.0035824	0.00262831	0.026158	Up	No	No
Fam229b	0.0126549	0.0125573	0.0139213	0.0116869	0.00974174	0.0116848	0.010226	0.00858918	0.0127051	0.0100604	0.00264469	0.023034	Up	No	No
Zfp27	0.00722154	0.00419929	0.0102932	0.00915019	0.00325606	0.00365315	0.00760162	0.0056642	0.00771605	0.00504376	0.00267229	0.038501	Up	No	No
Asrgl1	0.0129068	0.00967311	0.00870125	0.0122604	0.00995361	0.00713568	0.00803095	0.00771933	0.0108854	0.00820989	0.0026755	0.043669	Up	No	No
Rad9b	0.0106784	0.00569572	0.0098275	0.00908435	0.00717724	0.00482612	0.00530296	0.007116	0.0088215	0.00610558	0.00271592	0.043838	Up	No	No
Med19	0.0158745	0.0113636	0.0189177	0.0137785	0.011868	0.00818396	0.0179924	0.0109637	0.0149836	0.012252	0.00273162	0.024744	Up	No	No
Zgpat	0.0124496	0.00925382	0.0114614	0.00948227	0.00912396	0.00824845	0.00684247	0.00746804	0.0106618	0.00792073	0.00274105	0.039797	Up	No	No
Galt	0.0186172	0.0155652	0.0148138	0.0144718	0.0166544	0.0114023	0.0110217	0.0133909	0.015867	0.0131173	0.00274967	0.033348	Up	No	No
Chchd6	0.034388	0.0278688	0.0328403	0.0295223	0.0315946	0.0265806	0.0309545	0.0243242	0.0311549	0.0283635	0.00279137	0.047646	Up	No	No
Il1r2	0.0195918	0.0127901	0.06404	0.0469254	0.0170229	0.00945252	0.0615033	0.04408	0.0358368	0.0330147	0.00282215	0.000612	Up	No	No
AW146154	0.00828328	0.00781639	0.00633738	0.00733509	0.0040184	0.00388108	0.00363647	0.00693158	0.00744304	0.00461688	0.00282616	0.048224	Up	No	No
Grk4	0.0113766	0.0100123	0.0097835	0.00749099	0.0075708	0.00621693	0.00719268	0.00631522	0.00966586	0.00682391	0.00284196	0.019858	Up	No	No
Gm20449	0.00575838	0.00639481	0.00725812	0.00683646	0.00124509	0.00297364	0.00658519	0.00397964	0.00656194	0.00369589	0.00286605	0.038153	Up	No	No
Atg2a	0.0201727	0.0130665	0.015513	0.0130873	0.0182625	0.0104925	0.0122286	0.00933772	0.0154599	0.0125803	0.00287955	0.005663	Up	No	No
Proser2	0.0132529	0.0167483	0.0119025	0.0136087	0.00931706	0.0125931	0.00914663	0.0129369	0.0138781	0.0109984	0.00287968	0.036475	Up	No	No
Kpna6	0.0276663	0.0285943	0.0243409	0.0268638	0.0258037	0.0247056	0.0201469	0.0252762	0.0268663	0.0239831	0.00288321	0.023449	Up	No	No
Cldn11	0.0137173	0.0157249	0.0139843	0.00685744	0.00964907	0.0116478	0.0111069	0.00623062	0.012571	0.0096586	0.00291239	0.037173	Up	No	No
Cemip	0.00797837	0.00880325	0.00679258	0.00444465	0.00576957	0.00379065	0.00385257	0.00293174	0.00700471	0.00408613	0.00291858	0.03076	Up	No	No
Gm12258	0.0143648	0.0122317	0.0144566	0.010037	0.0130053	0.00976885	0.0102065	0.00641239	0.0127725	0.00984825	0.0029243	0.019634	Up	No	No
Mettl21a	0.011813	0.00962246	0.0126925	0.0103885	0.00765861	0.00766704	0.00798279	0.00936835	0.0111291	0.0081692	0.00295991	0.043443	Up	No	No
3110052M02Rik	0.00942894	0.00425227	0.00639204	0.00629407	0.00471247	0.00351844	0.00204833	0.00412505	0.00659183	0.00360107	0.00299076	0.049883	Up	No	No
Tmem29	0.0122382	0.0147614	0.0161554	0.013635	0.0079362	0.010266	0.0134141	0.0126311	0.0141975	0.0110618	0.00313564	0.030682	Up	No	No
Hace1	0.0218543	0.0303494	0.0342069	0.0296691	0.019383	0.0263967	0.0296314	0.0280419	0.0290199	0.0258633	0.00315667	0.018425	Up	No	No
Mvd	0.0145722	0.00815508	0.0179919	0.00995301	0.0111558	0.0066104	0.0133476	0.00678425	0.012668	0.00947451	0.00319353	0.015291	Up	No	No
Gpa33	0.0206693	0.0237998	0.0116053	0.0179434	0.0175397	0.0189809	0.00900346	0.0155697	0.0185044	0.0152735	0.00323098	0.009972	Up	No	No
Spag6l	0.0163987	0.00539501	0.018714	0.00980195	0.0110249	0.00475998	0.0157302	0.0058448	0.0125774	0.00933995	0.00323747	0.047547	Up	No	No
Msantd3	0.0101289	0.0115641	0.00999208	0.0128423	0.00618803	0.00785466	0.00670621	0.0107348	0.0111318	0.00787094	0.0032609	0.004082	Up	No	No
Sptbn2	0.0259058	0.023349	0.011892	0.0207629	0.0215028	0.0194909	0.0106893	0.0171567	0.0204774	0.0172099	0.00326746	0.019141	Up	No	No
Snhg4	0.0157869	0.0154757	0.0197883	0.0195645	0.0149744	0.0122234	0.0139736	0.0162752	0.0176538	0.0143616	0.0032922	0.048408	Up	No	No
Nudt10	0.00423156	0.0108719	0.00378893	0.00895973	0.00243303	0.00527479	0.00218262	0.00461764	0.00696303	0.00362702	0.00333601	0.042126	Up	No	No
Myo7b	0.00810089	0.00625484	0.00243466	0.00768374	0.00323987	0.0035568	0.00142116	0.00272172	0.00611853	0.00273489	0.00338365	0.037457	Up	No	No
Prr3	0.0322305	0.0212808	0.0235035	0.0275927	0.0288061	0.0192633	0.0199589	0.0230281	0.0261519	0.0227641	0.00338776	0.007485	Up	No	No
Wdr36	0.0194117	0.0201412	0.0147568	0.0155357	0.0146864	0.0151225	0.0116039	0.0147066	0.0174614	0.0140298	0.00343152	0.037371	Up	No	No
Arxes1	0.0166817	0.0166426	0.0136121	0.0129146	0.0116014	0.0148182	0.0108448	0.00885196	0.0149627	0.0115291	0.00343365	0.017209	Up	No	No
1110008F13Rik	0.00839547	0.00796432	0.0103029	0.00876793	0.00606733	0.00380564	0.00498873	0.00674152	0.00885766	0.00540081	0.00345685	0.021202	Up	No	No
Etnk2	0.00957017	0.0084324	0.00326173	0.00444237	0.00382658	0.00387935	0.00142065	0.00266554	0.00642667	0.00294803	0.00347864	0.039528	Up	No	No
2610037D02Rik	0.0109802	0.0107983	0.00960547	0.0116775	0.00737506	0.00671494	0.00760379	0.00744932	0.0107654	0.00728578	0.0034796	0.006461	Up	No	No
Trim7	0.0152898	0.0124443	0.00606045	0.0107624	0.0121932	0.00667036	0.00523058	0.00651886	0.0111392	0.00765326	0.00348599	0.044172	Up	No	No
Aatf	0.0323189	0.0266277	0.0407425	0.0287457	0.0273849	0.0210967	0.0379628	0.0277253	0.0321087	0.0285424	0.00356627	0.04095	Up	No	No
Pnck	0.0121386	0.0113453	0.00463579	0.011041	0.00773115	0.009731	0.00262171	0.00464764	0.00979019	0.00618287	0.00360732	0.048003	Up	No	No
4632427E13Rik	0.03124	0.0261504	0.0371219	0.0407658	0.0265672	0.0233757	0.0330424	0.0378476	0.0338195	0.0302082	0.0036113	0.004279	Up	No	No
Exoc3l	0.00864592	0.00843016	0.0170941	0.0108785	0.00571064	0.00431987	0.0111561	0.00939976	0.0112622	0.00764659	0.00361559	0.031279	Up	No	No
Ccpg1	0.0371992	0.0152304	0.0442441	0.0219656	0.0324188	0.0125435	0.0403624	0.0183347	0.0296598	0.0259148	0.00374497	0.003199	Up	No	No
Crocc	0.0146515	0.0108273	0.0147421	0.0125802	0.0100065	0.00882348	0.0104785	0.00848124	0.0132002	0.00944743	0.0037528	0.008017	Up	No	No
Nek4	0.0101251	0.010652	0.00959241	0.00701669	0.00442097	0.00673717	0.00637434	0.00480573	0.00934655	0.00558455	0.003762	0.014476	Up	No	No
C530008M17Rik	0.0409406	0.0279533	0.0305586	0.0263863	0.0367481	0.0219415	0.0283195	0.0235254	0.0314597	0.0276336	0.00382608	0.019489	Up	No	No
Slco1a6	0.027791	0.0179385	0.0393906	0.0336529	0.02536	0.0121005	0.0365066	0.0294485	0.0296933	0.0258539	0.00383937	0.01523	Up	No	No
Cep104	0.0327734	0.029444	0.0333485	0.0266772	0.027777	0.0251911	0.0280874	0.0258009	0.0305608	0.0267141	0.00384668	0.032058	Up	No	No
Mogs	0.0456465	0.0461875	0.0572003	0.0654629	0.0438983	0.0436663	0.0509384	0.0605896	0.0536243	0.0497731	0.00385118	0.034411	Up	No	No
2610528J11Rik	0.0141299	0.0190301	0.0116656	0.0118917	0.0085734	0.0145353	0.00946503	0.00851826	0.0141793	0.010273	0.00390635	0.012398	Up	No	No
Scaf8	0.109876	0.0853733	0.0985348	0.108676	0.105232	0.0802538	0.0921453	0.108193	0.100615	0.0964561	0.00415882	0.047477	Up	No	No
Epm2a	0.0210556	0.0129246	0.0123236	0.0122185	0.0168509	0.00797824	0.00855076	0.00818437	0.0146306	0.0103911	0.00423952	0.000456	Up	No	No
A2m	0.0104481	0.00833836	0.0112818	0.0100539	0.00809291	0.00435361	0.00490627	0.00577321	0.0100305	0.0057815	0.00424904	0.014225	Up	No	No
Cdkl1	0.0190228	0.0183912	0.021332	0.015276	0.0146654	0.0127206	0.0166219	0.0127388	0.0185055	0.0141867	0.00431884	0.007114	Up	No	No
Klhdc1	0.0152107	0.0103507	0.0103662	0.00648015	0.00750946	0.00688965	0.00553343	0.00518218	0.0106019	0.00627868	0.00432325	0.048411	Up	No	No
Bbs4	0.0162095	0.00986885	0.0125152	0.015606	0.0112388	0.0051441	0.0114772	0.0089441	0.0135499	0.00920106	0.00434883	0.034973	Up	No	No
Cc2d1b	0.0417123	0.0322717	0.042256	0.0344892	0.0345352	0.0270681	0.039711	0.0319643	0.0376823	0.0333196	0.0043627	0.03068	Up	No	No
Cdyl2	0.0281567	0.0231864	0.0256891	0.0231316	0.0235963	0.0205954	0.0191991	0.0192317	0.0250409	0.0206556	0.00438531	0.012451	Up	No	No
BC022687	0.024237	0.0195152	0.0223398	0.0209347	0.0210919	0.0125508	0.0189638	0.0167534	0.0217567	0.0173399	0.00441671	0.015123	Up	No	No
Dnaic1	0.0119528	0.00580707	0.0216185	0.0153907	0.00839156	0.00393192	0.0145206	0.00978474	0.0136923	0.0091572	0.00453506	0.028752	Up	No	No
Senp1	0.0340549	0.0380304	0.0761673	0.0562661	0.0314693	0.0354799	0.0687725	0.0503774	0.0511297	0.0465248	0.00460495	0.032253	Up	No	No
Gm6225	0.0210658	0.0106283	0.0224505	0.026128	0.0145309	0.00838053	0.0200758	0.0188055	0.0200682	0.0154482	0.00461996	0.041245	Up	No	No
Foxred1	0.0182916	0.0194267	0.0267121	0.0216057	0.01263	0.0169825	0.0196548	0.0182797	0.021509	0.0168867	0.00462227	0.022184	Up	No	No
Fam57b	0.0164069	0.0107092	0.0134313	0.0153272	0.0117628	0.00650207	0.0103699	0.0087469	0.0139687	0.00934542	0.00462324	0.008047	Up	No	No
Cwf19l2	0.0459043	0.0520712	0.0532194	0.0447054	0.0454574	0.0460552	0.0465772	0.0392501	0.0489751	0.044335	0.0046401	0.046742	Up	No	No
Shisa6	0.0166276	0.00503952	0.010207	0.00899707	0.00890977	0.00388506	0.00559393	0.00392124	0.0102178	0.0055775	0.00464029	0.041172	Up	No	No
Ndrg3	0.0604366	0.0615024	0.0563051	0.057037	0.056499	0.0541599	0.0533506	0.0525124	0.0588203	0.0541305	0.00468981	0.015558	Up	No	No
Kmt2c	0.0450448	0.0195206	0.0314232	0.0290598	0.0377845	0.0124926	0.0286053	0.0273934	0.0312621	0.0265689	0.00469314	0.046765	Up	No	No
Mycl	0.0164889	0.0160077	0.00979913	0.00831651	0.0121413	0.00996593	0.00546719	0.00413187	0.0126531	0.00792657	0.00472648	0.001724	Up	No	No
Ttc7b	0.04263	0.0319576	0.0358911	0.035902	0.0348219	0.0289256	0.033923	0.0296995	0.0365952	0.0318425	0.00475265	0.039538	Up	No	No
Pxmp4	0.0406685	0.036365	0.0282249	0.0289812	0.0341446	0.0326213	0.0231543	0.0249881	0.0335599	0.0287271	0.00483283	0.00466	Up	No	No
Rrnad1	0.0171984	0.0133513	0.0250731	0.016994	0.013866	0.00864267	0.0167038	0.0140439	0.0181542	0.0133141	0.00484011	0.029579	Up	No	No
Rsbn1	0.0459566	0.0398857	0.0372974	0.0415641	0.0430772	0.0342129	0.034472	0.0328483	0.0411759	0.0361526	0.00502335	0.036999	Up	No	No
Sgk3	0.0193488	0.0157883	0.0276083	0.0223872	0.0134566	0.0112597	0.0251311	0.0151138	0.0212831	0.0162403	0.00504285	0.01598	Up	No	No
Pfkm	0.0201717	0.0230508	0.0218911	0.0212285	0.015797	0.0142488	0.0188765	0.0170485	0.0215855	0.0164927	0.00509279	0.027963	Up	No	No
Toporsos	0.0313181	0.0318132	0.0344998	0.0314214	0.030178	0.0251675	0.0265683	0.0266834	0.0322631	0.0271493	0.00511378	0.040654	Up	No	No
Fam102a	0.0689837	0.0735738	0.0747043	0.0916931	0.0652719	0.0659074	0.0702968	0.0869768	0.0772387	0.0721132	0.00512549	0.00985	Up	No	No
Bmi1	0.0252751	0.026957	0.0303987	0.0249959	0.0189434	0.0209584	0.0270704	0.019973	0.0269067	0.0217363	0.00517037	0.004597	Up	No	No
Suv420h2	0.0625472	0.0610718	0.0547001	0.052275	0.0556699	0.0548842	0.0490516	0.05024	0.0576485	0.0524614	0.00518711	0.017196	Up	No	No
Ccdc136	0.0157503	0.0152051	0.0107637	0.0144146	0.00933056	0.0120426	0.00545716	0.00852638	0.0140334	0.00883917	0.00519425	0.005371	Up	No	No
Tor2a	0.0212115	0.0236161	0.0291098	0.0206587	0.0149648	0.018555	0.0244771	0.0157903	0.023649	0.0184468	0.00520223	0.000711	Up	No	No
Dpm2	0.0841579	0.0737853	0.0655928	0.0848678	0.0748419	0.0718712	0.0596255	0.081213	0.077101	0.0718879	0.00521305	0.047187	Up	No	No
Fam133b	0.0326392	0.0191487	0.0363928	0.0329765	0.0261033	0.0136394	0.0318319	0.0282042	0.0302893	0.0249447	0.0053446	0.001251	Up	No	No
Card19	0.0350978	0.0500439	0.04147	0.0417675	0.0314185	0.0440416	0.0365332	0.0350037	0.0420948	0.0367493	0.00534552	0.004109	Up	No	No
Fam3a	0.0351694	0.0373168	0.0396807	0.0388884	0.0312664	0.0353682	0.032193	0.0306295	0.0377638	0.0323643	0.00539953	0.036214	Up	No	No
Samd10	0.0395596	0.0396652	0.030812	0.039407	0.0341722	0.0337088	0.0292994	0.030622	0.037361	0.0319506	0.00541037	0.036367	Up	No	No
Drap1	0.0483395	0.048561	0.0471626	0.0551106	0.0424926	0.0429646	0.0428941	0.048905	0.0497934	0.0443141	0.00547936	0.000989	Up	No	No
Ptrhd1	0.0658888	0.0398953	0.0354312	0.0289442	0.0581658	0.0377559	0.026671	0.025392	0.0425399	0.0369962	0.0055437	0.040391	Up	No	No
Pacs1	0.070226	0.058608	0.0549923	0.0619624	0.0620916	0.0569247	0.0512675	0.0533042	0.0614472	0.055897	0.00555022	0.046866	Up	No	No
Ube2v2	0.0135015	0.0110959	0.0181167	0.0139428	0.00925745	0.00789146	0.00836639	0.0089088	0.0141642	0.00860603	0.00555819	0.031109	Up	No	No
Chkb	0.0718243	0.0692899	0.0791055	0.0774993	0.0704833	0.0628918	0.0734185	0.0684557	0.0744298	0.0688123	0.00561745	0.039041	Up	No	No
Rab33b	0.0664335	0.0575685	0.0639628	0.0540972	0.061172	0.0509269	0.0580989	0.049139	0.0605155	0.0548342	0.00568131	0.000606	Up	No	No
Cog5	0.0633998	0.0385706	0.0552451	0.0602731	0.0557551	0.0354067	0.0504939	0.052928	0.0543721	0.0486459	0.00572622	0.012865	Up	No	No
Bcl7b	0.0300258	0.0391915	0.031289	0.0371323	0.0248825	0.02914	0.0292442	0.0314234	0.0344097	0.0286725	0.00573715	0.04003	Up	No	No
Smpd3	0.0203922	0.013849	0.0280312	0.0208535	0.0148048	0.00771638	0.0215139	0.0161214	0.0207815	0.0150391	0.00574237	0.000663	Up	No	No
Neil2	0.0304241	0.0218992	0.0181843	0.0169459	0.0214534	0.0181149	0.0127054	0.0120229	0.0218634	0.0160741	0.00578923	0.013969	Up	No	No
Rsf1	0.0678469	0.049001	0.0699437	0.0637057	0.0634507	0.0419253	0.0624942	0.0593454	0.0626243	0.0568039	0.00582045	0.006083	Up	No	No
Pex13	0.0235224	0.0217447	0.019805	0.0168086	0.0164119	0.0169664	0.0133714	0.0118471	0.0204702	0.0146492	0.00582099	0.001973	Up	No	No
Rita1	0.0166144	0.0159416	0.0197855	0.0158785	0.0128549	0.0115121	0.0109763	0.00955116	0.017055	0.0112236	0.0058314	0.014179	Up	No	No
Ranbp3	0.0608253	0.064485	0.0624214	0.0547865	0.0562848	0.0532248	0.0596912	0.0496764	0.0606295	0.0547193	0.00591022	0.049805	Up	No	No
Sp4	0.0273625	0.0208214	0.0244896	0.0219792	0.0169074	0.0153492	0.0221945	0.016554	0.0236632	0.0177513	0.00591191	0.039345	Up	No	No
P4ha1	0.030766	0.0269058	0.0355453	0.034189	0.0235001	0.0222162	0.0332175	0.0247853	0.0318515	0.0259298	0.00592178	0.030903	Up	No	No
Mid2	0.0291691	0.0313981	0.0379481	0.0373652	0.0241445	0.0263894	0.0315926	0.0299744	0.0339701	0.0280252	0.0059449	0.001942	Up	No	No
Tex2	0.0524966	0.0552323	0.0604237	0.0551015	0.0456487	0.0521316	0.0566405	0.0450346	0.0558135	0.0498638	0.00594969	0.03363	Up	No	No
Pigq	0.0493317	0.0611891	0.0544618	0.0552057	0.0448929	0.0533833	0.0449987	0.0529589	0.0550471	0.0490585	0.00598861	0.03475	Up	No	No
Cdkl2	0.031568	0.0267639	0.0335984	0.0255574	0.0223849	0.0246399	0.0298079	0.0166877	0.029372	0.0233801	0.00599184	0.043894	Up	No	No
Itfg2	0.0364607	0.0307731	0.0284194	0.0381975	0.0285494	0.0214346	0.0275168	0.0320181	0.0334627	0.0273797	0.00608294	0.045758	Up	No	No
Map1lc3a	0.0985764	0.0850255	0.0559868	0.0582864	0.0916314	0.0817344	0.05031	0.049519	0.0744688	0.0682987	0.00617005	0.012681	Up	No	No
Iqcb1	0.02347	0.0187022	0.0180956	0.0136879	0.0161326	0.0126721	0.0103354	0.0100236	0.0184889	0.0122909	0.00619799	0.006709	Up	No	No
Rars2	0.0486063	0.0482893	0.0512404	0.041236	0.0432079	0.0378495	0.0460773	0.0372483	0.047343	0.0410957	0.00624724	0.022225	Up	No	No
Polg2	0.0176748	0.0169132	0.0317928	0.0310694	0.0145408	0.0115242	0.0218721	0.0241015	0.0243626	0.0180097	0.00635289	0.021048	Up	No	No
Ears2	0.0226011	0.0166219	0.0269282	0.0177864	0.0147329	0.012259	0.0170564	0.0143613	0.0209844	0.0146024	0.00638199	0.024046	Up	No	No
Mios	0.0284031	0.0280874	0.0345185	0.0235111	0.0206336	0.0214468	0.0244889	0.0223138	0.02863	0.0222208	0.0064092	0.041885	Up	No	No
Actl6b	0.0214007	0.0232146	0.0268266	0.0225522	0.018668	0.0140505	0.0197834	0.0157884	0.0234985	0.0170726	0.00642596	0.017346	Up	No	No
Pogz	0.0405525	0.0471597	0.041719	0.0482872	0.0363772	0.0397098	0.0364783	0.0390679	0.0444296	0.0379083	0.00652127	0.010307	Up	No	No
Id4	0.0369911	0.0420674	0.0379141	0.0260398	0.0290683	0.0343186	0.0322132	0.0210483	0.0357531	0.0291621	0.006591	0.002913	Up	No	No
Ankrd11	0.120881	0.105068	0.138161	0.130021	0.116747	0.102213	0.128006	0.120575	0.123533	0.116885	0.00664757	0.03667	Up	No	No
Usp48	0.0885051	0.0666075	0.0858812	0.0936813	0.0815322	0.0601812	0.0779739	0.0883784	0.0836688	0.0770164	0.00665236	0.001176	Up	No	No
Ankrd24	0.0461489	0.0381831	0.0409335	0.0449136	0.037947	0.0326286	0.0371753	0.0354904	0.0425448	0.0358103	0.00673443	0.013359	Up	No	No
Kti12	0.0201253	0.0265935	0.0122438	0.0176128	0.012953	0.0200481	0.00696905	0.00880635	0.0191438	0.0121941	0.00694972	0.002499	Up	No	No
2300009A05Rik	0.0547544	0.0615094	0.0653298	0.0603144	0.0508276	0.04935	0.059598	0.0540109	0.060477	0.0534466	0.00703038	0.029088	Up	No	No
Acvr1c	0.0557231	0.030749	0.0626336	0.0362666	0.0463716	0.0294835	0.0514893	0.0295944	0.0463431	0.0392347	0.00710839	0.04571	Up	No	No
Eml1	0.0351872	0.035625	0.0346933	0.0372609	0.0251706	0.027367	0.0267533	0.034657	0.0356916	0.028487	0.00720466	0.020456	Up	No	No
Mad2l2	0.0388331	0.0321672	0.0399427	0.0280635	0.033991	0.0187308	0.032686	0.0246951	0.0347516	0.0275257	0.00722591	0.047296	Up	No	No
Ndufs3	0.0476754	0.0568628	0.0547439	0.0451957	0.043155	0.0466569	0.0458749	0.0396951	0.0511195	0.0438455	0.00727397	0.012523	Up	No	No
Edem2	0.0849227	0.0670377	0.101004	0.0897525	0.0746323	0.0644095	0.0939599	0.0804895	0.0856791	0.0783728	0.00730633	0.023181	Up	No	No
Tmem38a	0.0435543	0.0409029	0.0487685	0.0388723	0.0361604	0.0308737	0.0401756	0.0350539	0.0430245	0.0355659	0.00745859	0.011151	Up	No	No
Svip	0.0441677	0.0469315	0.0444029	0.0486691	0.0414722	0.0353613	0.0401575	0.0372189	0.0460428	0.0385525	0.00749032	0.049408	Up	No	No
Ftx	0.0410547	0.0413109	0.0577784	0.0711831	0.0358112	0.0341409	0.0503779	0.0609945	0.0528318	0.0453311	0.00750066	0.005167	Up	No	No
Cwc25	0.0382685	0.0327422	0.0407741	0.0352028	0.0269765	0.0240631	0.0345762	0.0310874	0.0367469	0.0291758	0.00757109	0.016454	Up	No	No
Lats1	0.0622724	0.061248	0.0542845	0.0562402	0.0491627	0.0548451	0.0470303	0.0526599	0.0585113	0.0509245	0.00758677	0.032205	Up	No	No
Abhd16a	0.0693549	0.0617041	0.0643297	0.0661621	0.0625963	0.0552652	0.0602482	0.0529469	0.0653877	0.0577641	0.00762354	0.030008	Up	No	No
Sult1d1	0.0228152	0.0199202	0.00543877	0.0211298	0.0146767	0.0110805	0.00343653	0.00955495	0.017326	0.00968715	0.00763885	0.032404	Up	No	No
Efnb3	0.0190939	0.0230132	0.00581208	0.0251651	0.0110371	0.0119043	0.0040554	0.0151799	0.0182711	0.0105442	0.00772695	0.034236	Up	No	No
Gale	0.0301257	0.0149752	0.0366716	0.0226583	0.0188781	0.0110001	0.0259366	0.0175075	0.0261077	0.0183306	0.00777715	0.025435	Up	No	No
Yrdc	0.0441473	0.0598107	0.0562596	0.0630708	0.0381386	0.0448335	0.0512578	0.0576119	0.0558221	0.0479604	0.00786163	0.045668	Up	No	No
Ankrd54	0.0471171	0.0347362	0.0404663	0.0398309	0.0345835	0.0280473	0.0334786	0.0345482	0.0405376	0.0326644	0.00787325	0.016009	Up	No	No
Dapk3	0.0417482	0.0430802	0.0506297	0.0378867	0.0352908	0.0370877	0.0380814	0.031088	0.0433362	0.035387	0.00794921	0.014156	Up	No	No
Fam117b	0.119701	0.0948953	0.0823065	0.0868368	0.109431	0.0876537	0.0715145	0.0830961	0.0959349	0.0879239	0.00801097	0.015983	Up	No	No
Acyp2	0.0320012	0.0352634	0.0433148	0.0340236	0.0221423	0.0269249	0.0349001	0.0284336	0.0361508	0.0281002	0.00805055	0.002869	Up	No	No
Klc1	0.0925892	0.0975691	0.0888816	0.0739651	0.079721	0.0858905	0.0831798	0.0717919	0.0882513	0.0801458	0.00810546	0.048886	Up	No	No
2310011J03Rik	0.0387795	0.0412356	0.0203132	0.0238397	0.0246222	0.0310361	0.0171273	0.0188642	0.031042	0.0229124	0.00812955	0.047427	Up	No	No
Egr4	0.0197583	0.0276108	0.00681358	0.0339043	0.0114627	0.0150545	0.00440486	0.0245774	0.0220218	0.0138748	0.00814691	0.030979	Up	No	No
Clstn3	0.0209051	0.0208907	0.0107754	0.0209919	0.00747859	0.0117044	0.0076653	0.0139304	0.0183908	0.0101947	0.0081961	0.031754	Up	No	No
Arih2	0.0869391	0.0705776	0.0863766	0.0898007	0.0776502	0.0631038	0.0722569	0.0878182	0.0834235	0.0752073	0.00821622	0.046508	Up	No	No
Wdr61	0.0452118	0.0414467	0.0502836	0.0466622	0.041735	0.0357077	0.0383226	0.0342327	0.0459011	0.0374995	0.00840156	0.033115	Up	No	No
Apbb1	0.0455872	0.0429599	0.0583966	0.0448547	0.0347237	0.0325014	0.0530459	0.037126	0.0479496	0.0393493	0.00860034	0.006842	Up	No	No
Rnf167	0.0841936	0.0931198	0.0590786	0.0691156	0.0709221	0.0863459	0.0479826	0.0656268	0.0763769	0.0677193	0.00865759	0.028847	Up	No	No
Pacrg	0.0534186	0.0845311	0.0469831	0.0605626	0.0494935	0.07034	0.0368937	0.0539091	0.0613739	0.0526591	0.00871479	0.02936	Up	No	No
Med23	0.0284226	0.0328656	0.0335087	0.0285296	0.0183709	0.019188	0.0235916	0.0268145	0.0308316	0.0219913	0.00884038	0.039626	Up	No	No
Abcb9	0.0828554	0.0636433	0.0818263	0.07158	0.0762412	0.0543957	0.0722371	0.0615637	0.0749762	0.0661094	0.00886682	0.001391	Up	No	No
Sesn1	0.0644489	0.0459118	0.0534606	0.0443295	0.0528141	0.0385852	0.0439111	0.0373625	0.0520377	0.0431682	0.00886947	0.003821	Up	No	No
Fbxl20	0.0411349	0.0527843	0.0350855	0.0356661	0.0344501	0.0364706	0.0268624	0.0312804	0.0411677	0.0322659	0.00890182	0.04145	Up	No	No
Pcmt1	0.113734	0.0867037	0.102756	0.0918804	0.0982288	0.0765937	0.0992242	0.0850771	0.0987685	0.0897809	0.0089875	0.038944	Up	No	No
Romo1	0.136106	0.137705	0.113665	0.102015	0.125015	0.12434	0.10771	0.0960823	0.122373	0.113287	0.00908598	0.016707	Up	No	No
Cd200	0.0773629	0.0776931	0.102195	0.0672267	0.0756987	0.0656816	0.0923044	0.0544327	0.0811193	0.0720293	0.00909	0.037699	Up	No	No
Itpa	0.0913196	0.0724773	0.106982	0.0868992	0.07647	0.0673238	0.0967996	0.0805984	0.0894196	0.0802979	0.00912166	0.025235	Up	No	No
Cda	0.0489138	0.0361693	0.0356228	0.0339533	0.0363957	0.0264072	0.0335385	0.021081	0.0386648	0.0293556	0.00930919	0.033943	Up	No	No
Gm17767	0.0206157	0.0143996	0.0397709	0.0254634	0.0105174	0.0105707	0.025176	0.0166425	0.0250624	0.0157267	0.00933575	0.024378	Up	No	No
Kif5c	0.0337943	0.0241376	0.0380585	0.0295722	0.0261011	0.0161339	0.0250464	0.0206539	0.0313907	0.0219838	0.00940682	0.004638	Up	No	No
Slc16a9	0.0804169	0.0440031	0.0776976	0.0562603	0.0673324	0.0414712	0.0659694	0.0458503	0.0645945	0.0551558	0.00943863	0.028209	Up	No	No
Prkab2	0.0646376	0.0467772	0.0818098	0.0743498	0.0551083	0.0427543	0.0694931	0.0622884	0.0668936	0.057411	0.00948257	0.016046	Up	No	No
Tnfaip1	0.0876711	0.107586	0.0990229	0.096187	0.0735178	0.103088	0.0885041	0.0873785	0.0976168	0.0881221	0.00949474	0.017827	Up	No	No
Amz2	0.0637167	0.0744948	0.0650101	0.0610391	0.0544437	0.0591607	0.0608995	0.0517414	0.0660652	0.0565613	0.00950389	0.025549	Up	No	No
Rhbdd2	0.0507268	0.0433856	0.0520758	0.0466571	0.0443314	0.0308347	0.042267	0.0373412	0.0482113	0.0386936	0.00951772	0.004818	Up	No	No
Ehmt2	0.0935674	0.0871961	0.0759488	0.078916	0.085821	0.0750868	0.070598	0.065843	0.0839071	0.0743372	0.00956986	0.013446	Up	No	No
Ap2b1	0.162584	0.140825	0.145574	0.150075	0.15277	0.126715	0.135675	0.145568	0.149765	0.140182	0.00958267	0.016519	Up	No	No
Siah2	0.118113	0.104131	0.117946	0.115363	0.11072	0.0901914	0.11148	0.104805	0.113888	0.104299	0.00958924	0.010921	Up	No	No
Pcbp3	0.139981	0.0776071	0.138087	0.123571	0.131965	0.0677715	0.133665	0.107259	0.119811	0.110165	0.00964629	0.030455	Up	No	No
Mark2	0.121266	0.0844734	0.112187	0.118271	0.111904	0.0807278	0.0968197	0.107995	0.109049	0.0993615	0.00968795	0.026782	Up	No	No
Smad1	0.0882462	0.0863139	0.10559	0.0962824	0.0830596	0.070425	0.0929264	0.0904752	0.0941082	0.0842216	0.00988663	0.032644	Up	No	No
Tapbp	0.125043	0.112942	0.114519	0.131973	0.114452	0.107621	0.0962549	0.126556	0.121119	0.111221	0.00989838	0.047589	Up	No	No
Plcl2	0.0584678	0.038708	0.0764635	0.0748912	0.0461906	0.0299265	0.0695884	0.0625315	0.0621326	0.0520593	0.0100734	0.005017	Up	No	No
Fnta	0.0787261	0.0821001	0.0685546	0.0716791	0.0732744	0.0736666	0.0534762	0.0600048	0.075265	0.0651055	0.0101595	0.016289	Up	No	No
Rsph1	0.0509096	0.0331548	0.0453776	0.0348699	0.0365564	0.0235855	0.031235	0.0316979	0.041078	0.0307687	0.0103093	0.029315	Up	No	No
Nlk	0.167157	0.12799	0.174485	0.149407	0.157273	0.114695	0.159606	0.145638	0.154759	0.144303	0.0104564	0.023881	Up	No	No
Nectin3	0.100058	0.0742806	0.09842	0.0997448	0.0848428	0.0581952	0.0955248	0.0921145	0.0931258	0.0826693	0.0104565	0.045267	Up	No	No
Faf1	0.096274	0.0679971	0.106194	0.0933843	0.0868573	0.061543	0.0935317	0.0799746	0.0909623	0.0804767	0.0104856	0.007211	Up	No	No
Snrnp70	0.156601	0.134628	0.198941	0.169317	0.150535	0.128481	0.184624	0.153791	0.164872	0.154358	0.0105139	0.026043	Up	No	No
Atxn7	0.0667941	0.0446547	0.0778281	0.0682584	0.049999	0.0336829	0.0700199	0.061348	0.0643838	0.0537625	0.0106214	0.017676	Up	No	No
Tmbim4	0.0810301	0.0721536	0.0840062	0.0645627	0.0719426	0.0599454	0.0685092	0.0587491	0.0754381	0.0647866	0.0106516	0.014351	Up	No	No
Cpn1	0.0366005	0.0411596	0.0352545	0.0456635	0.0319153	0.0270809	0.0272001	0.0296327	0.0396695	0.0289572	0.0107123	0.026706	Up	No	No
Rgs17	0.0732802	0.0567004	0.0687818	0.0625338	0.0613328	0.0480754	0.0582291	0.0498497	0.0653241	0.0543718	0.0109523	0.001166	Up	No	No
Sdf2	0.104744	0.0980089	0.100103	0.0970467	0.0964322	0.0870484	0.0863013	0.0854813	0.0999755	0.0888158	0.0111597	0.002202	Up	No	No
Tom1l2	0.101583	0.0706078	0.102073	0.0903975	0.0907284	0.0633922	0.092156	0.0736184	0.0911653	0.0799738	0.0111915	0.011524	Up	No	No
Eri3	0.0954745	0.0832041	0.0935459	0.110696	0.0865409	0.0674827	0.083577	0.10038	0.0957302	0.084495	0.0112352	0.005159	Up	No	No
Serinc1	0.210174	0.197269	0.201538	0.212256	0.202867	0.191928	0.186236	0.19477	0.205309	0.19395	0.0113593	0.031426	Up	No	No
Mapk8ip3	0.0855161	0.0555603	0.0755585	0.0497852	0.0737904	0.0492901	0.0588703	0.0387896	0.066605	0.0551851	0.0114199	0.012733	Up	No	No
Pcyt1b	0.0319302	0.0300892	0.0175556	0.0181106	0.0142918	0.0141324	0.0116377	0.0119309	0.0244214	0.0129982	0.0114231	0.035277	Up	No	No
Macrod1	0.055545	0.0444426	0.0299667	0.0468927	0.0372669	0.0308163	0.0268291	0.0362397	0.0442118	0.032788	0.0114238	0.036856	Up	No	No
Mcur1	0.0678858	0.04783	0.0750371	0.061088	0.0506662	0.0380336	0.062077	0.0553524	0.0629602	0.0515323	0.0114279	0.018225	Up	No	No
Mcf2l	0.116976	0.0799785	0.0922529	0.0861274	0.095725	0.0746052	0.0827305	0.0764534	0.0938337	0.0823785	0.0114552	0.043873	Up	No	No
Sik1	0.0434247	0.0625387	0.0619549	0.0600887	0.0385253	0.0476179	0.0439215	0.0520507	0.0570018	0.0455288	0.0114729	0.032208	Up	No	No
Aftph	0.11015	0.0822974	0.10958	0.112068	0.0907965	0.0781455	0.0954493	0.103556	0.103524	0.0919869	0.0115371	0.039917	Up	No	No
Tcta	0.066083	0.0530935	0.0868695	0.0622267	0.0552607	0.0434156	0.0741533	0.0485326	0.0670682	0.0553406	0.0117276	0.000998	Up	No	No
Pitpna	0.16205	0.124103	0.122651	0.137597	0.145558	0.106361	0.120315	0.127066	0.1366	0.124825	0.0117753	0.044146	Up	No	No
Zfp266	0.0715049	0.0632173	0.0774878	0.0727084	0.0594163	0.0517162	0.0676113	0.0590239	0.0712296	0.0594419	0.0117877	0.000644	Up	No	No
Ap2a2	0.0926093	0.0704062	0.0787331	0.0814297	0.070718	0.0648452	0.0676383	0.0727417	0.0807946	0.0689858	0.0118088	0.04473	Up	No	No
Mboat2	0.172513	0.110794	0.13581	0.130958	0.169308	0.0997519	0.122736	0.110771	0.137519	0.125642	0.011877	0.042446	Up	No	No
Suox	0.0414159	0.0511298	0.0393209	0.0509714	0.0275284	0.0413277	0.0337169	0.0323704	0.0457095	0.0337358	0.0119736	0.023083	Up	No	No
Pla2g6	0.0818977	0.0711093	0.0596076	0.0739448	0.068904	0.0595681	0.0554051	0.0544735	0.0716399	0.0595877	0.0120522	0.031012	Up	No	No
Pde1c	0.0950041	0.0498771	0.115602	0.0714326	0.0781385	0.0430489	0.0971119	0.065277	0.082979	0.0708941	0.0120849	0.033816	Up	No	No
Unc45a	0.0628428	0.0538963	0.0612367	0.0587079	0.0529382	0.0391112	0.0482271	0.0480622	0.0591709	0.0470847	0.0120862	0.001688	Up	No	No
Kcnk3	0.0364895	0.0476306	0.0280544	0.0368734	0.0258027	0.0357316	0.0193559	0.019809	0.037262	0.0251748	0.0120872	0.006586	Up	No	No
Afg3l1	0.0654133	0.0580516	0.0659165	0.0592951	0.0453567	0.0447062	0.0522408	0.0575381	0.0621691	0.0499605	0.0122087	0.049191	Up	No	No
Pi4ka	0.102666	0.0869673	0.0950984	0.0912987	0.0876686	0.0762446	0.0821159	0.0811114	0.0940076	0.0817851	0.0122225	0.001585	Up	No	No
Fubp1	0.104508	0.0835131	0.100964	0.0891253	0.0820954	0.0697758	0.0949884	0.082257	0.0945276	0.0822791	0.0122485	0.04865	Up	No	No
Stim1	0.0818988	0.054034	0.0937135	0.0832897	0.0644404	0.0484024	0.0788538	0.0718609	0.078234	0.0658894	0.0123446	0.016915	Up	No	No
Cnep1r1	0.0649939	0.0508263	0.0637027	0.0764352	0.0462822	0.0472268	0.0499699	0.0630697	0.0639895	0.0516372	0.0123524	0.029798	Up	No	No
Tle1	0.0708846	0.0697757	0.0822583	0.0644365	0.0550641	0.0659276	0.062541	0.0541719	0.0718388	0.0594262	0.0124126	0.036855	Up	No	No
1700016P03Rik	0.0560842	0.0642475	0.0504054	0.0640348	0.0479546	0.0480159	0.0352783	0.0535372	0.058693	0.0461965	0.0124965	0.007296	Up	No	No
Dcaf8	0.142935	0.114882	0.14854	0.117516	0.134875	0.107475	0.128837	0.102332	0.130968	0.118379	0.0125888	0.023699	Up	No	No
Exoc7	0.0905577	0.0746696	0.0480861	0.0368423	0.0795618	0.0510394	0.0429123	0.0255352	0.0625389	0.0497622	0.0127768	0.046066	Up	No	No
Fkbp2	0.129373	0.0908667	0.131544	0.139302	0.105768	0.0837041	0.120913	0.129349	0.122771	0.109934	0.0128378	0.039443	Up	No	No
Atp6v1f	0.25404	0.221097	0.171637	0.198951	0.235189	0.201051	0.167085	0.190867	0.211431	0.198548	0.0128834	0.044641	Up	No	No
Ahcyl2	0.109794	0.088901	0.103835	0.0865683	0.0931107	0.074487	0.0938406	0.0756463	0.0972745	0.0842711	0.0130033	0.003568	Up	No	No
Pafah1b2	0.120262	0.112466	0.107406	0.105276	0.0987606	0.101186	0.0996046	0.0933658	0.111352	0.0982293	0.0131232	0.02085	Up	No	No
Tmed8	0.084967	0.103839	0.0780427	0.0885917	0.0823195	0.0888195	0.0620462	0.0696658	0.08886	0.0757127	0.0131473	0.035362	Up	No	No
Cdk16	0.0813078	0.0835026	0.0857899	0.0756467	0.0712744	0.0600091	0.073128	0.0684697	0.0815618	0.0682203	0.0133415	0.033279	Up	No	No
Trnp1	0.0376624	0.026076	0.0172983	0.0207027	0.014654	0.0141826	0.0113965	0.00660709	0.0254348	0.01171	0.0137248	0.030517	Up	No	No
Gm7334	0.0787429	0.112352	0.102691	0.0851702	0.0686022	0.0914505	0.0898524	0.0737552	0.0947389	0.080915	0.0138239	0.010676	Up	No	No
Tcea1	0.124731	0.117935	0.115244	0.11157	0.111003	0.0941897	0.112747	0.0955679	0.11737	0.103377	0.0139927	0.049834	Up	No	No
Fam20c	0.0957315	0.0738498	0.0731422	0.0826371	0.0735992	0.0582624	0.0648002	0.0721812	0.0813402	0.0672108	0.0141294	0.019301	Up	No	No
Tia1	0.157944	0.149841	0.195098	0.162431	0.14164	0.132769	0.178805	0.155177	0.166328	0.152098	0.0142306	0.008849	Up	No	No
Prrg2	0.0905656	0.0908075	0.066101	0.0667015	0.0861705	0.0653108	0.0523105	0.053382	0.0785439	0.0642934	0.0142505	0.045958	Up	No	No
Kdm7a	0.12027	0.090424	0.0635532	0.0669147	0.0988524	0.0699961	0.0579402	0.0572876	0.0852905	0.0710191	0.0142714	0.036001	Up	No	No
Lysmd2	0.0635044	0.0727798	0.0771729	0.0800996	0.0579757	0.0514614	0.0631318	0.0637602	0.0733892	0.0590823	0.0143069	0.022585	Up	No	No
Slc30a5	0.0789012	0.0739414	0.134109	0.0986053	0.0641539	0.0684515	0.108049	0.0873351	0.0963891	0.0819975	0.0143917	0.044997	Up	No	No
Isca1	0.117393	0.116528	0.142061	0.138192	0.0951851	0.108756	0.134844	0.116869	0.128543	0.113913	0.01463	0.038186	Up	No	No
Snhg8	0.0751958	0.0901384	0.0747328	0.0764155	0.0522272	0.0859295	0.05462	0.0647759	0.0791206	0.0643881	0.0147325	0.040533	Up	No	No
Igsf8	0.075389	0.0652184	0.0397805	0.057101	0.0495754	0.0485572	0.034272	0.0459849	0.0593722	0.0445974	0.0147749	0.042006	Up	No	No
Gnai1	0.0476549	0.0401884	0.0315634	0.028604	0.0272233	0.0306397	0.0135851	0.0171953	0.0370027	0.0221609	0.0148418	0.010623	Up	No	No
1110008P14Rik	0.108374	0.0968447	0.116903	0.075774	0.105048	0.0717966	0.101729	0.0598018	0.0994738	0.0845937	0.0148801	0.044385	Up	No	No
Ppp4r1l-ps	0.195183	0.114693	0.220627	0.176092	0.182917	0.0986079	0.207441	0.15799	0.176649	0.161739	0.0149097	0.001554	Up	No	No
Derl3	0.0501437	0.0353802	0.153464	0.0984534	0.0377716	0.0271478	0.137894	0.0741238	0.0843603	0.0692344	0.0151259	0.021393	Up	No	No
Copb1	0.166354	0.124639	0.195824	0.177364	0.139862	0.109651	0.18729	0.166872	0.166045	0.150919	0.0151265	0.032872	Up	No	No
Klhl1	0.0459957	0.0210105	0.0344035	0.0393449	0.0288124	0.0127324	0.0157715	0.0228143	0.0351887	0.0200327	0.015156	0.007418	Up	No	No
Rmnd5a	0.111733	0.0976202	0.116182	0.103939	0.0942117	0.0816076	0.103482	0.0893842	0.107369	0.0921713	0.0151972	0.000674	Up	No	No
Tgoln1	0.171431	0.164503	0.137166	0.159742	0.146303	0.148965	0.122248	0.153869	0.158211	0.142846	0.0153646	0.029796	Up	No	No
Srprb	0.0812048	0.0759711	0.114227	0.0844599	0.0624199	0.0608566	0.096538	0.0739768	0.0889657	0.0734478	0.0155179	0.003533	Up	No	No
Tspyl1	0.0893024	0.102664	0.0697242	0.0834587	0.0698843	0.077268	0.0660076	0.0695853	0.0862874	0.0706863	0.0156011	0.042901	Up	No	No
Reps1	0.122315	0.0736295	0.140473	0.146023	0.112065	0.0616305	0.111516	0.13367	0.12061	0.10472	0.0158897	0.036048	Up	No	No
Mgea5	0.162204	0.123657	0.140662	0.152643	0.139405	0.108395	0.136427	0.131107	0.144791	0.128834	0.0159577	0.032826	Up	No	No
Riok3	0.169164	0.153296	0.185408	0.162313	0.158307	0.129203	0.168263	0.150208	0.167545	0.151495	0.0160498	0.012842	Up	No	No
Fev	0.0434685	0.0421166	0.0254084	0.025587	0.0275973	0.0184619	0.0110725	0.0143622	0.0341451	0.0178735	0.0162716	0.008633	Up	No	No
Zfp949	0.109611	0.0991242	0.0836641	0.0741422	0.0969229	0.0860078	0.0589948	0.059428	0.0916353	0.0753384	0.0162969	0.01035	Up	No	No
Dbpht2	0.0769597	0.0565103	0.0427191	0.051121	0.0556054	0.0506992	0.022286	0.0332312	0.0568275	0.0404554	0.0163721	0.019854	Up	No	No
Lpgat1	0.0993426	0.0891829	0.09649	0.0942317	0.0744416	0.067823	0.0808266	0.0893934	0.0948118	0.0781212	0.0166906	0.031866	Up	No	No
Dpp9	0.0935369	0.0872899	0.103788	0.114818	0.0892527	0.0724304	0.0829035	0.0867618	0.0998582	0.0828371	0.0170211	0.042965	Up	No	No
Rab3d	0.134595	0.0967193	0.166577	0.14246	0.115197	0.0880334	0.147719	0.121044	0.135088	0.117998	0.0170892	0.009332	Up	No	No
Rc3h2	0.125682	0.0939527	0.113874	0.107951	0.101632	0.0905253	0.0965483	0.0843757	0.110365	0.0932704	0.0170943	0.037908	Up	No	No
Rnf141	0.0898718	0.0939462	0.0713832	0.0813055	0.0631465	0.0695556	0.0639564	0.0698006	0.0841267	0.0666148	0.0175119	0.03447	Up	No	No
Ppp2r1a	0.134839	0.147628	0.12223	0.131681	0.114828	0.124978	0.111106	0.115101	0.134094	0.116503	0.0175912	0.005819	Up	No	No
Gabarapl1	0.161027	0.180526	0.0990548	0.139626	0.155359	0.155319	0.0844739	0.109069	0.145058	0.126055	0.0190033	0.041682	Up	No	No
Ern1	0.0778335	0.0457389	0.0829644	0.0611873	0.0517763	0.0306111	0.061644	0.0476216	0.066931	0.0479133	0.0190178	0.00709	Up	No	No
Ffar4	0.0688848	0.0560662	0.0329552	0.0442326	0.0388334	0.035683	0.0298321	0.020155	0.0505347	0.0311259	0.0194088	0.043848	Up	No	No
1500011B03Rik	0.124017	0.114027	0.103196	0.128739	0.103735	0.0865875	0.0997498	0.102166	0.117495	0.0980595	0.0194352	0.039666	Up	No	No
Ypel3	0.221541	0.244739	0.125469	0.173012	0.190373	0.240323	0.106071	0.148741	0.19119	0.171377	0.0198132	0.039675	Up	No	No
Birc6	0.242577	0.162325	0.250407	0.229868	0.212818	0.157489	0.222724	0.212691	0.221294	0.20143	0.0198638	0.040202	Up	No	No
Rnf10	0.143049	0.174725	0.169737	0.162805	0.123566	0.159409	0.137248	0.149547	0.162579	0.142443	0.0201366	0.018591	Up	No	No
Dync2h1	0.134916	0.0757217	0.148099	0.127865	0.110792	0.0659677	0.113254	0.115717	0.121651	0.101433	0.0202179	0.039905	Up	No	No
Canx	0.282611	0.268402	0.357505	0.295927	0.265213	0.250627	0.31968	0.287466	0.301111	0.280746	0.0203648	0.046362	Up	No	No
Zfp568	0.160135	0.0968069	0.175303	0.130646	0.142145	0.0825998	0.151249	0.104995	0.140723	0.120247	0.0204756	0.004569	Up	No	No
Minos1	0.192443	0.205257	0.224833	0.208993	0.175751	0.18442	0.210006	0.179221	0.207881	0.187349	0.0205319	0.008559	Up	No	No
Mrps33	0.205621	0.2079	0.178007	0.16533	0.183123	0.181372	0.162628	0.145431	0.189214	0.168138	0.0210761	0.002882	Up	No	No
Ncor1	0.284382	0.150974	0.344462	0.268455	0.268312	0.142788	0.31764	0.231293	0.262068	0.240008	0.0220601	0.039732	Up	No	No
Tubb2a	0.0914808	0.111249	0.161988	0.133745	0.0667591	0.0887657	0.13233	0.120657	0.124616	0.102128	0.0224877	0.007477	Up	No	No
Golgb1	0.184785	0.111763	0.280097	0.170298	0.151635	0.0885876	0.257333	0.15904	0.186736	0.164149	0.0225867	0.014999	Up	No	No
Agfg1	0.103673	0.0842578	0.114736	0.115894	0.0792888	0.0724758	0.0824199	0.0925468	0.10464	0.0816828	0.0229573	0.012271	Up	No	No
Deptor	0.183216	0.148529	0.141116	0.154084	0.164729	0.118187	0.113191	0.137553	0.156736	0.133415	0.0233213	0.006426	Up	No	No
Pld3	0.126205	0.0961625	0.0825888	0.114002	0.0944532	0.0671082	0.075696	0.0875346	0.104739	0.081198	0.0235415	0.025197	Up	No	No
Hyou1	0.139936	0.0831902	0.238965	0.149637	0.11728	0.0775834	0.197747	0.124203	0.152932	0.129203	0.0237287	0.047366	Up	No	No
Sik2	0.102018	0.0521269	0.0932311	0.097469	0.0679113	0.0379872	0.0686436	0.0749939	0.0862114	0.062384	0.0238274	0.010157	Up	No	No
Gars	0.236152	0.23288	0.236652	0.218116	0.23237	0.208324	0.205563	0.179168	0.23095	0.206356	0.0245939	0.046996	Up	No	No
Dnajb9	0.169434	0.152467	0.234247	0.220515	0.146593	0.12488	0.223637	0.182784	0.194166	0.169473	0.0246924	0.021933	Up	No	No
Fxyd6	0.177025	0.142953	0.0989849	0.149934	0.134367	0.113761	0.0909456	0.130157	0.142224	0.117308	0.0249164	0.042448	Up	No	No
Gpsm1	0.184124	0.102754	0.146283	0.123417	0.143568	0.0893998	0.113302	0.110454	0.139145	0.114181	0.0249638	0.037507	Up	No	No
Cryba2	0.127219	0.092094	0.0979714	0.0506172	0.0839881	0.0646287	0.0857695	0.0329584	0.0919753	0.0668362	0.0251391	0.034446	Up	No	No
Ubb	0.499376	0.395004	0.477992	0.333363	0.451377	0.379137	0.460162	0.314246	0.426434	0.401231	0.0252033	0.045594	Up	No	No
Tmem50a	0.230824	0.266661	0.16491	0.207781	0.210389	0.226089	0.156351	0.175974	0.217544	0.192201	0.0253431	0.035569	Up	No	No
Rab2a	0.392859	0.324784	0.411699	0.392649	0.351697	0.303101	0.390056	0.375605	0.380498	0.355115	0.0253831	0.017952	Up	No	No
Ffar2	0.116735	0.107722	0.117193	0.116206	0.0934121	0.080182	0.102087	0.0790877	0.114464	0.0886922	0.0257719	0.011094	Up	No	No
Ssr2	0.24038	0.226557	0.24971	0.236651	0.218936	0.186418	0.239804	0.203448	0.238324	0.212151	0.0261728	0.029274	Up	No	No
Irak1	0.213524	0.170128	0.274173	0.241817	0.20503	0.139036	0.248396	0.199906	0.22491	0.198092	0.0268181	0.030985	Up	No	No
Atp5g1	0.274939	0.318428	0.423807	0.274729	0.262295	0.289485	0.373643	0.257228	0.322976	0.295663	0.027313	0.046714	Up	No	No
Stxbp5l	0.118558	0.063195	0.0807628	0.101309	0.0782568	0.0409383	0.0683212	0.0599595	0.090956	0.061869	0.0290871	0.026013	Up	No	No
Trim35	0.293335	0.345941	0.239011	0.255009	0.268524	0.300817	0.213558	0.233393	0.283324	0.254073	0.0292508	0.012071	Up	No	No
Sdf2l1	0.14638	0.108881	0.336517	0.245946	0.128538	0.0773953	0.321349	0.191226	0.209431	0.179627	0.029804	0.045856	Up	No	No
Smim14	0.303002	0.26591	0.331236	0.329508	0.298514	0.235059	0.294226	0.282061	0.307414	0.277465	0.0299493	0.046693	Up	No	No
Rap1gap2	0.192053	0.16361	0.131297	0.209336	0.156752	0.151028	0.111881	0.156447	0.174074	0.144027	0.0300471	0.044174	Up	No	No
Kdelr2	0.272487	0.222076	0.298922	0.293932	0.244714	0.196906	0.282611	0.242143	0.271855	0.241593	0.0302613	0.028189	Up	No	No
Pitpnc1	0.14802	0.0951654	0.120034	0.135488	0.100269	0.0787329	0.0971751	0.100825	0.124677	0.0942505	0.0304263	0.021631	Up	No	No
Stx5a	0.170055	0.157121	0.230306	0.207872	0.165921	0.112305	0.193631	0.171186	0.191339	0.160761	0.0305779	0.042784	Up	No	No
Ubn2	0.374834	0.270247	0.418355	0.352536	0.35376	0.233182	0.372968	0.333505	0.353993	0.323354	0.0306394	0.017021	Up	No	No
Arg1	0.0600086	0.0691748	0.0110059	0.0761586	0.02424	0.0401441	0.00359938	0.0227645	0.054087	0.022687	0.0314	0.04561	Up	No	No
Fam219a	0.354338	0.195009	0.306267	0.332334	0.30338	0.180531	0.28365	0.28888	0.296987	0.26411	0.0328768	0.031285	Up	No	No
Tcf25	0.249196	0.232915	0.275218	0.260533	0.219176	0.199325	0.246668	0.220927	0.254466	0.221524	0.0329416	0.000901	Up	No	No
Rpn2	0.333356	0.299414	0.463352	0.410309	0.317839	0.252072	0.439136	0.363095	0.376608	0.343035	0.0335727	0.025592	Up	No	No
Camk2b	0.208566	0.20946	0.220308	0.180722	0.18161	0.185483	0.178943	0.138323	0.204764	0.171089	0.0336746	0.005886	Up	No	No
Rab3b	0.125128	0.104305	0.0562965	0.0975247	0.0780315	0.0690998	0.0506057	0.0466493	0.0958134	0.0610966	0.0347168	0.042717	Up	No	No
Stk11	0.201197	0.192455	0.134085	0.186817	0.168175	0.151494	0.0957656	0.158345	0.178639	0.143445	0.0351936	0.001066	Up	No	No
1700086L19Rik	0.155721	0.163906	0.111252	0.0969463	0.0884371	0.132563	0.0851094	0.0773247	0.131956	0.0958586	0.0360978	0.042976	Up	No	No
Cplx2	0.248294	0.186486	0.195991	0.208058	0.217915	0.138076	0.180262	0.153783	0.209707	0.172509	0.0371984	0.02406	Up	No	No
Cnot6l	0.419064	0.334205	0.400548	0.425267	0.403461	0.290831	0.371973	0.362184	0.394771	0.357112	0.0376591	0.034452	Up	No	No
Arf1	0.560245	0.589957	0.561071	0.629583	0.528303	0.539798	0.543069	0.578309	0.585214	0.54737	0.0378445	0.017669	Up	No	No
St18	0.206891	0.122567	0.244751	0.242466	0.192539	0.0844327	0.205305	0.182413	0.204169	0.166172	0.0379965	0.026823	Up	No	No
Pdia4	0.211296	0.236469	0.458231	0.317828	0.199212	0.188396	0.427118	0.255641	0.305956	0.267592	0.0383638	0.038213	Up	No	No
Rasd1	0.230333	0.177246	0.227777	0.298316	0.20559	0.136631	0.202662	0.234171	0.233418	0.194763	0.0386545	0.025082	Up	No	No
Hmgn3	0.208139	0.173643	0.120125	0.154774	0.139768	0.12878	0.108853	0.117079	0.16417	0.12362	0.0405503	0.040942	Up	No	No
Fam159b	0.110381	0.072855	0.012509	0.0758465	0.0348013	0.0304571	0.00172356	0.0339235	0.0678978	0.0252264	0.0426714	0.048385	Up	No	No
Cacna2d1	0.321745	0.184243	0.28317	0.263429	0.248099	0.155899	0.26592	0.208152	0.263147	0.219518	0.0436293	0.042199	Up	No	No
Tmed10	0.449235	0.390635	0.506383	0.432086	0.406481	0.354526	0.448235	0.39136	0.444585	0.400151	0.0444343	0.002632	Up	No	No
Hist3h2ba	0.159704	0.163116	0.115399	0.122911	0.101987	0.100267	0.101948	0.0751994	0.140282	0.0948503	0.0454321	0.026457	Up	No	No
Dynlt1f	0.677154	0.337967	0.515529	0.439185	0.622004	0.282748	0.508729	0.370548	0.492459	0.446007	0.0464514	0.041919	Up	No	No
Sec24d	0.310163	0.226865	0.424681	0.348207	0.292678	0.178913	0.359587	0.28049	0.327479	0.277917	0.0495619	0.023298	Up	No	No
Rfx6	0.348476	0.232358	0.260048	0.224519	0.284085	0.213111	0.215419	0.148945	0.26635	0.21539	0.0509598	0.025844	Up	No	No
Lpl	0.262779	0.274336	0.358588	0.27709	0.214547	0.23875	0.284828	0.189567	0.293198	0.231923	0.0612752	0.013917	Up	No	No
Hspa5	1.04109	0.814769	1.17341	1.27152	0.992976	0.753641	1.13655	1.14987	1.0752	1.00826	0.0669401	0.038304	Up	No	No
Calr	0.846968	0.802122	1.22972	0.997448	0.772055	0.744689	1.17237	0.906106	0.969063	0.898805	0.070258	0.003285	Up	No	No
Aplp1	0.4955	0.442093	0.358003	0.378701	0.394856	0.339762	0.338245	0.288055	0.418574	0.340229	0.0783448	0.02843	Up	No	No
Pcsk1n	0.501862	0.485838	0.521813	0.475197	0.405649	0.366228	0.476121	0.368869	0.496178	0.404217	0.0919607	0.010738	Up	No	No
Meg3	1.97655	1.49082	1.93691	1.84953	1.82462	1.36411	1.83106	1.66473	1.81345	1.67113	0.142322	0.003579	Up	No	No
Rbp4	0.84955	0.796058	0.212932	0.520631	0.399214	0.507737	0.131611	0.251024	0.594793	0.322396	0.272396	0.036579	Up	No	No
Sst	1.60014	1.92459	0.361398	1.36889	0.869664	1.37948	0.299685	0.621219	1.31376	0.792513	0.521243	0.047133	Up	No	No
tdTomato	1.28987	1.36055	1.31324	1.37604	0.318534	0.276378	0.273629	0.276704	1.33492	0.286311	1.04861	4.5e-05	Up	No	No

## Sheet: Table S3
Females- P60			Males- P60
DEG-comprised pathways/processes	P-values		DEG-comprised pathways/processes	P-values
Protein transport	1.8e-09		ER to Golgi vesicle-mediated transport	0.0022
Endoplasmic reticulum	2.3e-08		endoplasmic reticulum	5.9e-07
Mitochondrion	1e-06		mitochondrion	0.019
Nucleotide binding	1.1e-06		nucleotide binding	0.00012
Metal ion binding	1.7e-06		metal ion binding	0.00045
Ribonucleoprotein	2.2e-05		cytoplasmic translation	0.00047
Ubl conjugation	6.6e-05		Ubl conjugation	0.0011
Redox-active center	7.8e-05
Thioredoxin domain	0.00034		DOMAIN:Thioredoxin 1	0.035
Golgi apparatus	0.0012		ER-Golgi transport	0.0088
Calcium ion regulated exocytosis	0.0037		Calcium-dependent secretion activator	0.022
Rhythmic process	0.0074		rhythmic process	0.43
Protein binding involved in cell-cell adhesion	0.011		anchoring junction	0.0017
Endoplasmic reticulum chaperone complex	0.013		endoplasmic reticulum chaperone complex	0.007
DOMAIN:J (stress res[ponse genes)	0.02		cytoplasmic stress granule	0.0042
Positive regulation of insulin secretion	0.042		Calcium-dependent secretion activator	0.022
Phospholipid/glycerol acyltransferase	0.042		calcium-dependent phospholipid binding	0.045
Wnt signaling pathway	0.055
Calcium channel	0.058		calcium channel activity	0.59
Nuclease activity	0.061
Cellular response to DNA damage stimulus	0.062		positive regulation of DNA repair	0.0018
Activation of cysteine-type endopeptidase activity involved in apoptotic process	0.062		Death domain	0.32
Heterotrimeric G-protein complex	0.063		GTPase activation	0.15
Tricarboxylic acid cycle	0.064		Tricarboxylic acid cycle	0.26
Apoptosis	0.067		Death domain	0.32
Calmodulin binding	0.07		calmodulin binding	0.42
Microtubule	0.078		Microtubule	4.1e-05
Coated pit	0.086
Ion channel	0.1		ion channel activity	0.14
Cell division	0.11		cell division	0.15
			C2 calcium-dependent membrane targeting	0.01
			cortical actin cytoskeleton	0.064
			regulation of stem cell differentiation	0.029
			Autophagy	0.049

## Sheet: Table S4
Genes	M1-tdT+	M2-tdT+	M3-tdT+	F1-tdT+	F2-tdT+	F3-tdT+	M1-tdT-	M2-tdT-	M3-tdT-	F1-tdT-	F2-tdT-	F3-tdT-	Aver P	Aver N	Diff	Down or Up in tdT+ cells	P_value	Shared DEGs in P2 and P60	P2_Lower-Methylation in eYFP+ cells?	P2_Higher-Methylation in eYFP+ cells?	P60_Lower-Methylation in eYFP+ cells?	P60_Higher-Methylation in eYFP+ cells?
Ins2	5.86129	5.73874	5.76706	5.93436	5.89275	5.81346	5.86167	5.87649	5.92804	5.9488	6.00154	5.98451	5.83461	5.93351	-0.0988994	Down	0.022292	NC	No	No	No	No
mt-Nd6	1.48941	1.50768	1.29102	1.67915	1.3644	1.37747	1.55884	1.57219	1.35097	1.77176	1.4966	1.44164	1.45152	1.532	-0.0804795	Down	0.000875	Down	No	No	No	No
mt-Nd4	1.87049	2.12602	1.70831	2.05893	2.09763	2.03578	1.93337	2.15293	1.77082	2.16762	2.22651	2.0705	1.98286	2.05362	-0.0707619	Down	0.007801	Down	No	No	No	No
mt-Nd2	1.61565	1.52227	1.40034	1.6579	1.34489	1.26311	1.66873	1.59948	1.40997	1.75586	1.46512	1.31164	1.46736	1.53513	-0.0677725	Down	0.008288	Down	No	No	No	No
mt-Co1	0.732903	1.06674	0.602259	0.983072	0.497065	0.579933	0.813946	1.1588	0.650905	1.07521	0.555918	0.58216	0.743662	0.806156	-0.0624944	Down	0.006743	Down	No	No	No	No
mt-Nd1	1.42604	1.7877	1.39763	1.6068	1.68351	1.62567	1.45139	1.85726	1.43281	1.66005	1.80505	1.65616	1.58789	1.64379	-0.0558938	Down	0.012701	Down	No	No	No	No
Tjp1	0.69666	0.975366	0.677883	0.764166	0.981178	0.93434	0.74442	1.07054	0.650555	0.834769	1.05888	0.977445	0.838265	0.889435	-0.05117	Down	0.033282	Down	No	Yes	No	Yes
mt-Cytb	2.14789	2.38244	1.86005	2.2864	2.26008	2.23897	2.18899	2.41991	1.91049	2.34729	2.36104	2.24107	2.19597	2.2448	-0.0488293	Down	0.01407	Down	No	No	No	No
Zdhhc2	0.350171	0.260977	0.245234	0.295048	0.427758	0.432305	0.379795	0.28565	0.306116	0.343968	0.476445	0.49471	0.335249	0.381114	-0.0458652	Down	0.000823	NC	No	No	No	No
Ftl1	0.685571	0.659295	0.719778	0.676131	0.707118	0.753434	0.745903	0.686144	0.755774	0.72215	0.723311	0.794758	0.700221	0.738006	-0.0377852	Down	0.001804	NC	No	Yes	No	No
B2m	0.0478489	0.0328622	0.0386839	0.0371282	0.0618164	0.134128	0.131803	0.0759488	0.0504602	0.0956237	0.0680079	0.156128	0.0587446	0.0963286	-0.037584	Down	0.027955	NC	No	No	No	No
Mt1	0.366459	0.339528	0.321001	0.406698	0.522937	0.665246	0.4024	0.390094	0.348734	0.449599	0.535138	0.664088	0.436978	0.465009	-0.0280308	Down	0.016782	NC	No	No	No	Yes
Mt2	0.235381	0.245126	0.254188	0.275709	0.41301	0.455456	0.278967	0.291611	0.267443	0.333935	0.410516	0.460863	0.313145	0.340556	-0.0274107	Down	0.044169	NC	No	No	No	No
Grik3	0.30165	0.401878	0.446561	0.276561	0.299889	0.405503	0.334851	0.426616	0.485345	0.319359	0.305105	0.416773	0.35534	0.381341	-0.0260012	Down	0.008463	NC	Yes	Yes	No	Yes
Glul	0.226726	0.235716	0.24493	0.225541	0.309878	0.293452	0.241364	0.271029	0.255354	0.256024	0.329453	0.314203	0.25604	0.277905	-0.0218642	Down	0.002358	NC	Yes	No	No	Yes
Pmepa1	0.0306408	0.0117949	0.0156991	0.0100999	0.0149426	0.0172072	0.073507	0.0386314	0.020014	0.0377443	0.0179711	0.0214367	0.0167308	0.0348841	-0.0181533	Down	0.04453	NC	Yes	Yes	No	Yes
Defb1	0.084865	0.109475	0.0654199	0.0935504	0.144655	0.164291	0.10973	0.105888	0.103211	0.1074	0.164047	0.172861	0.110376	0.127189	-0.0168132	Down	0.033566	NC	No	No	No	No
Fshr	0.0711121	0.148999	0.0711558	0.0845615	0.0934362	0.0451629	0.0798985	0.176943	0.0766603	0.0923205	0.118061	0.051879	0.0857379	0.0992936	-0.0135558	Down	0.020806	NC	No	Yes	No	No
D030068K23Rik	0.141795	0.310602	0.15976	0.175386	0.00157443	0.236202	0.147482	0.320139	0.171885	0.203509	0.00196391	0.259118	0.170887	0.184016	-0.0131295	Down	0.02809	NC	No	No	No	No
Tgfbr1	0.0284907	0.0292117	0.0215639	0.022211	0.0245064	0.0257139	0.0488706	0.0553798	0.0238198	0.044081	0.0292923	0.0281401	0.0252829	0.0382639	-0.012981	Down	0.033805	NC	No	No	No	No
Cotl1	0.0404262	0.0464394	0.0514125	0.0403321	0.0336696	0.0377813	0.0720171	0.0661861	0.0568157	0.0518449	0.0364535	0.0398788	0.0416768	0.0538661	-0.0121892	Down	0.049514	NC	No	Yes	No	No
Fcer1g	0.0341167	0.0146257	0.0131749	0.0139439	0.0133971	0.0158187	0.057786	0.0360382	0.0217859	0.0332785	0.0134324	0.0158695	0.0175128	0.0296984	-0.0121856	Down	0.038833	NC	No	No	No	No
Gsn	0.0782552	0.0448235	0.0601471	0.0510458	0.0571254	0.0806669	0.103676	0.0678946	0.0674076	0.0685817	0.0571115	0.0803044	0.0620107	0.0741626	-0.012152	Down	0.047955	NC	Yes	No	No	No
Spc25	0.127536	0.130326	0.144648	0.160598	0.0954034	0.111293	0.129268	0.147389	0.166543	0.170487	0.106163	0.116887	0.128301	0.139456	-0.0111555	Down	0.013903	NC	No	No	No	No
Lcp1	0.00395625	0.000466236	0.00193305	0.000842771	0.00108634	0.00159397	0.0262141	0.0186591	0.0026417	0.0154379	0.00398568	0.00771969	0.00164644	0.012443	-0.0107966	Down	0.029813	NC	No	No	No	No
Marcks	0.064203	0.0898505	0.0700553	0.0677666	0.0592387	0.0578518	0.0776378	0.103712	0.0720234	0.0860295	0.0611921	0.0716856	0.068161	0.0787133	-0.0105524	Down	0.013247	NC	No	No	Yes	No
Mafb	0.0255243	0.0268073	0.012616	0.0183392	0.0206789	0.0160665	0.04538	0.0449316	0.0137993	0.0333319	0.0245836	0.0199051	0.0200054	0.0303219	-0.0103165	Down	0.028007	NC	Yes	No	Yes	No
Sparc	0.0261382	0.00738164	0.0145941	0.00566967	0.0152237	0.0118674	0.0463766	0.0107944	0.0176432	0.0171513	0.0281402	0.0193876	0.0134791	0.0232489	-0.00976978	Down	0.014507	NC	Yes	No	No	No
Msn	0.00202311	0.00302532	0.00475433	0.000987959	0.00271017	0.00525251	0.0161981	0.0218357	0.00752494	0.0149995	0.0059752	0.00676856	0.00312557	0.012217	-0.00909142	Down	0.030152	NC	No	Yes	No	No
Hpgds	0.00880213	0.00776919	0.00663547	0.00938929	0.0102207	0.00968864	0.0307026	0.0185087	0.00943298	0.018986	0.011592	0.015144	0.00875091	0.0173944	-0.00864349	Down	0.036333	NC	No	No	No	No
Ube2c	0.00844551	0.00211395	0.00116981	0.00965846	0.00330158	0.00898974	0.0238529	0.00121743	0.00985716	0.0210626	0.0168834	0.0118836	0.00561317	0.0141262	-0.00851302	Down	0.021885	NC	No	No	No	No
Hexa	0.105172	0.0940089	0.0965204	0.102247	0.0749175	0.0981273	0.119883	0.0987678	0.107632	0.114865	0.0717038	0.108787	0.0951655	0.103607	-0.00844097	Down	0.025957	NC	No	No	No	No
S100a6	0.00707392	0.0114699	0.011819	0.00371131	0.0180289	0.0173491	0.0181539	0.0197616	0.0199945	0.00798714	0.0251418	0.0288643	0.0115754	0.0199839	-0.00840849	Down	0.000583	NC	No	No	No	No
Slc22a23	0.0733542	0.0745951	0.081341	0.0750209	0.0599897	0.0766995	0.0826303	0.0790736	0.0985551	0.0724585	0.0715399	0.0861227	0.0735001	0.08173	-0.00822997	Down	0.029871	NC	Yes	No	No	Yes
Ighm	0.00176002	0	0	0	0.000264972	0.000345475	0.0204689	0.0147952	0	0.00832411	0.000745125	0.00617173	0.000395079	0.00841753	-0.00802245	Down	0.04841	NC	No	No	No	No
Zim1	0.0407883	0.0372797	0.02035	0.0511354	0.0292492	0.0324476	0.045847	0.04644	0.0231705	0.0678644	0.037697	0.0369063	0.0352084	0.0429875	-0.00777918	Down	0.012578	NC	No	No	No	No
Cd9	0.0100017	0.0115132	0.00361312	0.00635531	0.00495157	0.00616657	0.0312836	0.0199233	0.00602698	0.0114723	0.00574954	0.0143847	0.00710024	0.0148067	-0.00770649	Down	0.049382	NC	Yes	Yes	No	No
Elovl5	0.0872522	0.0930681	0.0909405	0.0946248	0.140833	0.145316	0.0911663	0.103484	0.0888641	0.104453	0.156644	0.153327	0.108672	0.116323	-0.0076507	Down	0.028148	NC	No	No	No	Yes
Fkbp1b	0.156187	0.178739	0.192399	0.177026	0.2167	0.280939	0.16188	0.179114	0.207049	0.195092	0.220904	0.283597	0.200332	0.207939	-0.00760785	Down	0.046536	NC	No	No	No	No
Lrp1b	0.10739	0.0995625	0.0935409	0.0997681	0.0863204	0.0963586	0.107039	0.110463	0.105374	0.110772	0.097835	0.095843	0.0971567	0.104554	-0.00739751	Down	0.030713	NC	No	No	No	Yes
Gt(ROSA)26Sor	0.0410522	0.0419468	0.0508591	0.0479973	0.051896	0.0396315	0.0517008	0.0442929	0.0536826	0.0547509	0.0572119	0.0541086	0.0455638	0.0526246	-0.00706078	Down	0.014479	Down	No	No	No	No
Trim28	0.0685814	0.063955	0.064414	0.0684627	0.063545	0.0593599	0.0706117	0.076431	0.0769862	0.0802309	0.0647688	0.0600708	0.0647197	0.0715166	-0.00679688	Down	0.039541	NC	No	No	No	No
Zfp36l1	0.00119316	0.00151116	0.00141301	0.00422095	0.0031078	0.000755531	0.0138264	0.0114355	0.00109822	0.0137738	0.0116554	0.000725136	0.0020336	0.00875241	-0.00671881	Down	0.030513	NC	Yes	No	Yes	Yes
Aif1	0.00374745	8.7987e-05	0.000490484	0.00016712	0.000260561	0.000164626	0.0152196	0.0141742	0.000682193	0.00854786	0.000330895	0.00617802	0.000819704	0.00752213	-0.00670243	Down	0.036192	NC	No	No	No	No
Ostf1	0.0180071	0.0270525	0.0317071	0.0231367	0.024263	0.031733	0.030102	0.0369468	0.0349462	0.0324689	0.0264097	0.0319635	0.0259832	0.0321395	-0.0061563	Down	0.027134	NC	Yes	No	No	Yes
4933406I18Rik	0.095632	0.05742	0.0709608	0.0717479	0.0815028	0.0816123	0.10223	0.0700662	0.0817419	0.0737407	0.0819355	0.0857687	0.0764793	0.0825804	-0.00610112	Down	0.027494	NC	No	No	No	No
Hist1h4i	0.0207569	0.0199286	0.0163298	0.0303232	0.0337315	0.0448324	0.0259639	0.0254944	0.0303893	0.0323631	0.0425795	0.0449024	0.0276504	0.0336154	-0.00596501	Down	0.032804	NC	No	No	No	No
Fam129a	0.00133727	0.00193285	0.000741878	0.00180249	0.00152267	0.000996157	0.014676	0.00523815	0.00279981	0.0133718	0.0048111	0.00244279	0.00138889	0.00722326	-0.00583438	Down	0.040587	NC	No	No	No	No
Rbms1	0.0468409	0.0401214	0.0360568	0.0384397	0.0385821	0.0307733	0.0457462	0.048184	0.0481195	0.0457238	0.0399024	0.0375814	0.038469	0.0442095	-0.00574051	Down	0.032632	NC	No	Yes	No	No
Camk1d	0.0672767	0.0735588	0.0565164	0.0489876	0.0856987	0.0989958	0.0738418	0.0823359	0.0630353	0.0591144	0.0834444	0.103614	0.071839	0.0775643	-0.0057253	Down	0.023507	NC	Yes	No	Yes	No
Anxa2	0.00197112	0.000871569	0.00215905	0.00164141	0.00207683	0.00268155	0.016483	0.00291508	0.00681022	0.00767189	0.00493344	0.00585226	0.00190025	0.00744432	-0.00554406	Down	0.032209	NC	Yes	Yes	No	Yes
Ifngr1	0.01121	0.00791718	0.00751839	0.00864623	0.00862648	0.00724055	0.0204365	0.0196058	0.00975581	0.0166211	0.00916268	0.0087951	0.00852647	0.0140628	-0.00553636	Down	0.033688	NC	Yes	No	No	No
Ptprc	0.00129909	0.000840114	0.000996782	0.00028428	0.000697224	0.000432768	0.0106956	0.00757357	0.000766378	0.010579	0.00270134	0.00323234	0.000758377	0.00592471	-0.00516633	Down	0.031521	NC	No	No	No	No
Pdcd6ip	0.0832021	0.0776128	0.0852332	0.0837803	0.087218	0.081419	0.0873601	0.0826675	0.0948026	0.0892352	0.087613	0.0874743	0.0830776	0.0881921	-0.00511452	Down	0.008319	NC	No	Yes	No	No
Tgfbr2	0.00574683	0.000972818	0.00120843	0.00271935	0.00200726	0.00148104	0.0148366	0.00992343	0.00247947	0.0103178	0.00478748	0.00142198	0.00235596	0.00729446	-0.0049385	Down	0.031507	NC	Yes	Yes	Yes	No
Sbno1	0.060405	0.0652779	0.0625169	0.067439	0.0709389	0.0654233	0.0715529	0.0682106	0.0599475	0.0735313	0.0778541	0.0703964	0.0653335	0.0702488	-0.00491531	Down	0.046119	NC	No	No	No	No
Dars	0.0448159	0.0448356	0.0452419	0.0454195	0.0374017	0.037328	0.0541944	0.0462704	0.0505633	0.0547375	0.0403229	0.0382434	0.0425071	0.0473887	-0.00488154	Down	0.02508	NC	Yes	Yes	No	Yes
Hn1	0.020573	0.0129601	0.0181095	0.017975	0.012922	0.0147233	0.0283458	0.0187234	0.0188885	0.0282112	0.011426	0.020291	0.0162105	0.020981	-0.00477052	Down	0.044293	NC	No	No	No	No
Tnfaip3	0.0103322	0.0109794	0.0095216	0.00291617	0.00896163	0.0123317	0.0168677	0.0189663	0.0104073	0.0112244	0.0123237	0.0131987	0.00917378	0.0138314	-0.00465758	Down	0.020477	NC	Yes	No	No	No
Pxylp1	0.0336473	0.0250839	0.0329833	0.0282976	0.0386909	0.0308676	0.0385672	0.0308666	0.0423025	0.0333239	0.0378942	0.0341395	0.0315951	0.0361823	-0.00458721	Down	0.019412	Down	No	No	No	Yes
Lsp1	0.000877878	0.000175493	0.024493	5.97502e-05	0.000196171	8.88949e-05	0.00811952	0.00203227	0.0309727	0.0107159	0.000793265	0.000678308	0.0043152	0.00888533	-0.00457013	Down	0.043482	NC	No	No	No	No
Emid1	0.0184769	0.0090014	0.0114722	0.0172125	0.028952	0.026777	0.0212151	0.0154478	0.0165158	0.020858	0.0304059	0.034345	0.0186487	0.0231313	-0.0044826	Down	0.005062	NC	Yes	No	No	No
Oat	0.00468662	0.0036657	0.00464658	0.00454641	0.0036337	0.00302833	0.0111635	0.00941901	0.00700042	0.00891754	0.0105538	0.00404037	0.00403456	0.00851577	-0.00448121	Down	0.005693	NC	No	No	No	No
Ppp1r18	0.00307462	0.000575385	0.000703574	0.000597343	0.000835232	0.00106921	0.0111006	0.00755606	0.000455494	0.00808267	0.004277	0.00186596	0.00114256	0.0055563	-0.00441374	Down	0.030023	NC	No	No	No	No
Mki67	0.00664196	0.00442342	0.00605119	0.00983019	0.00374149	0.0035177	0.0131549	0.00524598	0.00863978	0.0123148	0.01192	0.00902482	0.00570099	0.0100501	-0.00434907	Down	0.012877	NC	No	No	No	No
Anxa3	0.0014087	0.000641206	0.00159592	0.00347946	0.00128522	0.000910214	0.0090955	0.00343536	0.00717046	0.0119323	0.00203623	0.000910978	0.00155345	0.00576347	-0.00421001	Down	0.034163	NC	No	Yes	No	No
Dbnl	0.0377441	0.0377015	0.0418664	0.0424789	0.0439751	0.0441166	0.0420104	0.0449645	0.049428	0.0447491	0.0439591	0.0477878	0.0413137	0.0454832	-0.00416941	Down	0.017204	NC	No	No	No	No
Lmo4	0.00815279	0.00275046	0.00314559	0.00850055	0.00618015	0.00479668	0.0156464	0.00662157	0.00692418	0.0118118	0.00938855	0.00813255	0.0055877	0.00975417	-0.00416647	Down	0.001618	NC	Yes	Yes	No	No
Ntrk3	0.0068442	0.0153159	0.00945579	0.00377579	0.0387269	0.0217244	0.00975805	0.0138131	0.0139811	0.00644948	0.0480659	0.0287273	0.0159738	0.0201325	-0.00415867	Down	0.042499	NC	Yes	Yes	No	Yes
Fstl1	0.00444689	0.000906155	0.00177358	0.00172861	0.00161487	0.00174459	0.0105587	0.00492329	0.00575484	0.00455339	0.00533131	0.00528661	0.00203578	0.00606802	-0.00403224	Down	0.000295	NC	Yes	No	No	No
Marcksl1	0.00358237	0.000382073	0.00145153	0.001075	0.00182798	0.00131828	0.0122491	0.00583999	0.00217387	0.00613721	0.000906611	0.00543582	0.0016062	0.00545709	-0.00385089	Down	0.041484	NC	Yes	No	No	No
Asah1	0.0918721	0.0946559	0.0941616	0.0960056	0.104744	0.10573	0.09596	0.0955733	0.10257	0.0966661	0.109747	0.109515	0.0978616	0.101672	-0.00381021	Down	0.022401	NC	No	No	No	No
Aldh2	0.0251283	0.0278569	0.030032	0.0222263	0.0292522	0.024232	0.0309646	0.026055	0.0339778	0.029035	0.0337711	0.0275208	0.0264546	0.0302207	-0.0037661	Down	0.028027	NC	No	No	No	No
Cdhr1	0.0533204	0.0538838	0.0555771	0.0633484	0.0596979	0.0671537	0.0564918	0.0552489	0.0576529	0.0646219	0.0634685	0.0778048	0.0588302	0.0625481	-0.00371792	Down	0.049769	NC	No	No	No	No
Hdac1	0.0325717	0.0345251	0.0299166	0.0352634	0.0329218	0.0348074	0.0344381	0.0412927	0.0353948	0.0387651	0.0315557	0.0407873	0.0333343	0.037039	-0.00370463	Down	0.031342	NC	Yes	No	No	No
Flna	0.00786566	0.00430564	0.00622234	0.00608317	0.00538636	0.00414685	0.0116041	0.0121117	0.00659344	0.0107085	0.0100453	0.00469549	0.00566834	0.00929308	-0.00362474	Down	0.025264	NC	No	No	No	No
C230088H06Rik	0.0173609	0.0145729	0.0164973	0.022018	0.0124572	0.0108642	0.0194999	0.0170736	0.0149904	0.0302463	0.0172555	0.0163507	0.0156284	0.0192361	-0.00360769	Down	0.045731	NC	No	No	No	No
Rragc	0.0553198	0.0503519	0.055405	0.0672699	0.0682578	0.0703044	0.0628507	0.0546524	0.062313	0.0676262	0.0692216	0.071708	0.0611515	0.0647286	-0.00357719	Down	0.038266	NC	No	Yes	Yes	No
Mgat4a	0.00623962	0.0109445	0.00616945	0.00676258	0.00744289	0.00530285	0.0155599	0.0161105	0.00821703	0.0105474	0.00784216	0.00587784	0.00714365	0.0106925	-0.00354882	Down	0.04976	NC	No	No	No	Yes
Tex14	0.0123465	0.0105899	0.00769912	0.00701648	0.0084022	0.0106509	0.0140302	0.0162045	0.0138772	0.0111994	0.0108629	0.011744	0.00945086	0.0129864	-0.0035355	Down	0.009329	NC	No	No	No	No
Yy1	0.0260746	0.0216859	0.031524	0.0260625	0.0296314	0.0308638	0.0320361	0.0248711	0.0347516	0.0320569	0.0348093	0.0281744	0.0276404	0.0311166	-0.00347618	Down	0.048189	NC	No	No	No	No
Ckap2	0.00482842	0.00135487	0.00215332	0.0070694	0.00298965	0.0043592	0.0124487	0.00176166	0.0049627	0.0090743	0.00658579	0.00850718	0.00379248	0.00722339	-0.00343091	Down	0.018224	NC	No	No	No	No
AW112010	0.000284279	0.000444822	0.000204132	0.000457676	0.00207792	0.00088954	0.00692076	0.00237843	0.00279082	0.00247637	0.00769776	0.00255253	0.000726395	0.00413611	-0.00340972	Down	0.011621	NC	No	No	No	No
Kcna2	0.00467677	0.00422215	0.00700937	0.00561952	0.00405556	0.00333735	0.0112769	0.00478329	0.0102898	0.00816196	0.00750754	0.00733389	0.00482012	0.00822556	-0.00340544	Down	0.008218	NC	No	No	No	No
Selplg	0.00281021	0.000275538	0.000176228	0.000696685	0.000418558	0.000205209	0.00943382	0.00741781	0.000172344	0.00400637	0.00286221	0.000917753	0.000763737	0.00413505	-0.00337131	Down	0.038913	NC	No	No	No	No
Ptp4a2	0.0231265	0.0233334	0.0220125	0.0219912	0.024686	0.0229669	0.0309064	0.027974	0.0261762	0.0249345	0.0242975	0.0235306	0.0230194	0.0263032	-0.00328378	Down	0.041936	NC	No	No	No	No
Tmem97	0.0104781	0.0140584	0.0149895	0.011466	0.0131357	0.0144898	0.0114467	0.018283	0.0218987	0.0134005	0.0124678	0.0207599	0.0131029	0.0163761	-0.00327318	Down	0.045388	NC	No	No	No	No
Fxyd1	0.00257275	3.4923e-05	0.000419964	6.04238e-05	0.000815185	0.000539897	0.00684822	0.000185285	0.00377549	0.00177924	0.00331403	0.00782696	0.000740524	0.00395487	-0.00321435	Down	0.023437	NC	No	No	No	No
Fmn1	0.0079202	0.0107616	0.00891396	0.0041947	0.00579411	0.00885078	0.0104516	0.0174837	0.00921625	0.011129	0.00741185	0.00999757	0.00773922	0.0109483	-0.00320912	Down	0.042015	NC	No	No	No	No
Ppp2r2b	0.0158914	0.0130626	0.0105822	0.0100341	0.0206122	0.011207	0.0174681	0.0173391	0.0143817	0.0169562	0.0248799	0.00954895	0.0135649	0.0167623	-0.00319742	Down	0.043889	NC	No	Yes	No	No
Lamtor5	0.0352538	0.029357	0.0252518	0.032775	0.0379526	0.0351928	0.0425115	0.0343511	0.0296162	0.0352553	0.0377017	0.0354814	0.0326305	0.0358195	-0.00318904	Down	0.042945	NC	No	No	No	No
Agps	0.0301724	0.0215468	0.0224701	0.0263141	0.0344149	0.0296948	0.0330269	0.026233	0.0272991	0.0308014	0.0349986	0.0311182	0.0274355	0.0305795	-0.003144	Down	0.008295	NC	Yes	No	No	No
Nckap1l	0.000834897	0.000763255	9.00481e-05	0.000935085	0.000288583	0.000744577	0.00886714	0.00337381	0.000955557	0.0059084	0.00180277	0.00161138	0.000609408	0.00375318	-0.00314377	Down	0.042594	NC	No	No	No	No
Lrp5	0.0058653	0.0066528	0.00667664	0.00503578	0.00630594	0.0089104	0.00995689	0.012622	0.0101057	0.00777794	0.00723072	0.0104567	0.00657448	0.00969166	-0.00311719	Down	0.008558	NC	No	No	No	No
Cdc20	0.00161267	0.000345386	0.00024839	0.00246143	0.00167363	0.00248312	0.00643539	0.000124816	0.00383749	0.00684023	0.00540055	0.00419765	0.00147077	0.00447269	-0.00300192	Down	0.011843	NC	No	No	No	No
Tbc1d24	0.0191473	0.0169385	0.0133614	0.0173353	0.023529	0.020498	0.0221859	0.0190808	0.0204148	0.0186076	0.024878	0.0236299	0.0184682	0.0214661	-0.0029979	Down	0.018601	NC	No	No	No	No
Utp18	0.0112708	0.0093492	0.0109104	0.0124828	0.0110895	0.0102405	0.0173566	0.0141592	0.0112986	0.0146693	0.0128627	0.012974	0.0108905	0.0138868	-0.00299624	Down	0.017084	NC	No	Yes	No	Yes
Cd48	0.00116323	0.000987032	0.00106099	0.00170726	0.00162611	0.000983211	0.00548902	0.00592009	0.00488325	0.00633239	0.00121706	0.00143043	0.00125464	0.00421204	-0.0029574	Down	0.026228	Down	No	No	No	No
1700112E06Rik	0.0194794	0.0113215	0.0176169	0.0132547	0.0199669	0.0149956	0.0207446	0.0174825	0.0203889	0.014379	0.0220586	0.0187588	0.0161058	0.0189687	-0.00286288	Down	0.013853	NC	No	No	No	No
Bmp2k	0.00727881	0.00628974	0.00431697	0.00607398	0.00565476	0.00643505	0.0111096	0.00824599	0.00621207	0.00775625	0.00736716	0.012327	0.00600822	0.00883633	-0.00282812	Down	0.009767	NC	No	Yes	No	No
Cdh7	0.00626074	0.00912794	0.00512259	0.00585752	0.00744853	0.00906243	0.00913702	0.00938112	0.00686209	0.00877647	0.0136052	0.011946	0.00714663	0.00995133	-0.0028047	Down	0.016688	NC	No	No	No	No
Tifa	0.00381654	0.00516353	0.00537912	0.00357522	0.00441141	0.00627716	0.00734153	0.00975143	0.00655344	0.0051593	0.00647327	0.0100223	0.0047705	0.0075502	-0.00277971	Down	0.00411	NC	No	No	No	Yes
Reep4	0.0129084	0.00787028	0.00902258	0.0120549	0.00973989	0.0138074	0.0175205	0.0107645	0.00982352	0.0129595	0.0138508	0.0171475	0.0109006	0.0136777	-0.00277716	Down	0.00819	NC	No	No	No	No
Egflam	0.00223638	0.00281797	0.00223414	0.00177826	0.0027827	0.00174588	0.00463221	0.00796399	0.00356872	0.0038299	0.00322951	0.00691151	0.00226589	0.00502264	-0.00275675	Down	0.018839	NC	No	No	Yes	Yes
Plcg2	0.00476986	0.00752183	0.00447785	0.00486482	0.00483958	0.0040394	0.00803705	0.00997937	0.00530142	0.0112458	0.00464116	0.00776974	0.00508556	0.0078291	-0.00274354	Down	0.033925	NC	Yes	No	Yes	No
Tnfrsf11a	0.00912029	0.00939996	0.00769291	0.00612617	0.00980056	0.0167561	0.0113415	0.0140802	0.0070957	0.0100234	0.0138252	0.0186206	0.00981599	0.0124978	-0.00268178	Down	0.0197	NC	No	Yes	Yes	No
Zfp597	0.0143105	0.00886707	0.00740216	0.0109653	0.0103532	0.011229	0.0156041	0.0111506	0.0123449	0.0141077	0.0150817	0.0108108	0.0105212	0.0131833	-0.00266212	Down	0.024919	NC	No	No	No	No
Ahnak	0.00673959	0.00403296	0.00294382	0.000940408	0.00266722	0.00325484	0.00908446	0.00624839	0.0034962	0.00530052	0.0086214	0.00376075	0.00342981	0.00608529	-0.00265548	Down	0.029268	NC	No	Yes	No	No
Rassf5	0.00240283	0.00246619	0.00150405	0.00163489	0.00177438	0.00208007	0.00654957	0.00498376	0.00375865	0.00471346	0.00441873	0.00328392	0.00197707	0.00461801	-0.00264094	Down	0.001135	NC	No	No	No	Yes
Cks2	0.00242536	0.00125715	0.000294888	0.00319323	0.0016292	0.00256996	0.0053721	0.00300385	9.55395e-05	0.00947535	0.00443991	0.00482593	0.00189496	0.00453545	-0.00264048	Down	0.028224	NC	Yes	No	No	No
Cmtm7	0.00409786	0.00268596	0.00164451	0.00116111	0.00138332	0.00125237	0.00770285	0.00891966	0.00185218	0.00434279	0.00221438	0.00293197	0.00203752	0.00466064	-0.00262312	Down	0.033113	NC	Yes	No	No	No
Ltb	5.71242e-05	6.57278e-05	0.000194828	0	0.000300351	0.000292859	0.00263792	0.00233865	0.00130265	0.00563559	0.00273846	0.0019374	0.000151815	0.00276511	-0.0026133	Down	0.009822	NC	No	No	No	No
Tgfb2	0.00391423	0.00116313	0.00104012	0.00188041	0.00166031	0.000352163	0.00466073	0.00383499	0.00735106	0.00317562	0.00165925	0.00492221	0.00166839	0.00426731	-0.00259892	Down	0.047179	NC	Yes	No	No	Yes
Ikzf1	0.000993168	0.00195244	0.000609711	0.000180699	0.00084738	0.000383995	0.00664897	0.0059835	0.00155476	0.00351473	0.00170191	0.000980563	0.000827899	0.0033974	-0.00256951	Down	0.029408	NC	No	Yes	No	No
Sp110	0.000428842	6.53479e-05	0.000192549	0.000473293	0.000570446	0.00139677	0.00419242	0.00458042	0.000884243	0.0060388	0.00185602	0.000957521	0.000521208	0.0030849	-0.0025637	Down	0.046299	NC	No	No	No	No
Fhod3	0.0512253	0.07247	0.0523963	0.0434947	0.0638595	0.0687529	0.0519555	0.0737446	0.0575446	0.0476984	0.065688	0.0707322	0.0586998	0.0612272	-0.00252744	Down	0.016507	NC	Yes	Yes	No	No
Nudt21	0.0172806	0.0165758	0.0166505	0.0158674	0.0198695	0.0180204	0.0188598	0.0169823	0.0193589	0.0181471	0.0254909	0.0203539	0.0173774	0.0198655	-0.0024881	Down	0.01715	NC	No	Yes	No	No
Cnn2	0.00221736	0.000538626	0.00043311	0.000410142	0.00054896	0.000557162	0.0037486	0.00508069	0.00101816	0.00161429	0.00215548	0.00579109	0.000784227	0.00323472	-0.00245049	Down	0.02677	NC	No	No	No	No
Plekhf2	0.00625352	0.00742485	0.00592239	0.00399565	0.00857117	0.00607965	0.00764491	0.00904725	0.00958925	0.0093918	0.00888206	0.00826029	0.00637454	0.00880259	-0.00242805	Down	0.022381	Down	Yes	No	No	No
Ets1	0.00199332	0.000789101	0.000911962	0.0017791	0.00174648	0.00125477	0.00539544	0.00652011	0.000816074	0.0043698	0.00434984	0.00145045	0.00141246	0.00381695	-0.00240449	Down	0.041271	NC	Yes	No	No	No
Gpr132	0.000197456	7.32172e-05	0.000148451	0.00029867	0.000798012	0.000328844	0.00106852	0.00427721	0	0.00265923	0.00674292	0.00150051	0.000307442	0.00270806	-0.00240062	Down	0.049968	NC	Yes	No	No	No
Mdfic	0.00347494	0.00158697	0.000914415	0.000585595	0.000755115	0.000643828	0.0061291	0.00399707	0.000979562	0.00664773	0.00374554	0.000661775	0.00132681	0.00369346	-0.00236665	Down	0.048489	NC	No	No	No	No
Fig4	0.0156917	0.0156046	0.0173768	0.0214117	0.0191236	0.0163172	0.0203471	0.0163521	0.0225465	0.0240669	0.0191138	0.0171798	0.0175876	0.0199344	-0.00234674	Down	0.045992	NC	No	No	No	No
Cfl2	0.0273781	0.0194184	0.0162562	0.0241826	0.0282288	0.0229512	0.0305774	0.0229346	0.0156264	0.02922	0.0292175	0.0248401	0.0230692	0.0254027	-0.00233344	Down	0.036242	NC	No	No	No	No
Setd4	0.00578754	0.00324167	0.00486017	0.00488671	0.00665343	0.00786142	0.0106263	0.00654173	0.00814927	0.00575396	0.00684824	0.00920995	0.00554849	0.0078549	-0.00230641	Down	0.024616	NC	Yes	Yes	Yes	No
Col15a1	0.00143088	0.00047273	0.001274	0.0010238	0.00187835	0.0023483	0.00547872	0.00234943	0.00315377	0.00395119	0.00144832	0.0058815	0.00140467	0.00371049	-0.00230581	Down	0.016688	NC	No	No	No	No
Plppr4	0.00871264	0.0119677	0.01362	0.0081355	0.01616	0.0192051	0.0116291	0.0129318	0.0158751	0.0142777	0.0165541	0.0202954	0.0129668	0.0152605	-0.00229373	Down	0.04399	NC	No	No	No	No
Padi2	0.00776952	0.00563093	0.00664571	0.00757626	0.00678341	0.0103985	0.0112269	0.00999585	0.00765581	0.0106824	0.00636105	0.0125805	0.00746739	0.0097504	-0.00228302	Down	0.024194	NC	No	No	No	No
Ipo7	0.0296151	0.0365845	0.027078	0.0394513	0.0370645	0.0323128	0.0284759	0.0405344	0.0306183	0.0412111	0.0414714	0.0333825	0.0336844	0.0359489	-0.00226456	Down	0.046795	NC	Yes	No	Yes	No
Zfp157	0.0129245	0.0134578	0.00968952	0.0102529	0.0108328	0.00979279	0.0131967	0.0130988	0.0142383	0.0134383	0.0126537	0.0138387	0.0111584	0.0134108	-0.00225239	Down	0.04082	NC	No	No	No	No
Mcam	0.00319368	0.000802942	0.000639901	0.000707202	0.00157147	0.00117838	0.00405036	0.000883126	0.00413524	0.00185404	0.00497332	0.00544494	0.00134893	0.00355684	-0.00220791	Down	0.02558	NC	No	No	No	No
Amotl2	0.00671171	0.00891094	0.00765621	0.0111519	0.0120802	0.00898003	0.00933075	0.012045	0.0112322	0.0131612	0.0123961	0.0100949	0.0092485	0.0113767	-0.00212819	Down	0.008425	NC	Yes	No	Yes	No
Trim23	0.0103688	0.0122296	0.0105349	0.01116	0.0138183	0.012403	0.0130893	0.0164093	0.0109803	0.0149072	0.0148689	0.0130042	0.0117524	0.0138765	-0.0021241	Down	0.024933	NC	No	No	No	No
Nid1	0.00477714	0.0010148	0.00115851	0.000384516	0.000839361	0.00147778	0.00741858	0.00379377	0.000639577	0.00265865	0.00286739	0.00500687	0.00160869	0.00373081	-0.00212212	Down	0.013511	NC	No	No	No	No
Ube3b	0.0142301	0.0172611	0.0176847	0.0133823	0.0157677	0.0176098	0.0186245	0.0195073	0.0197467	0.016828	0.0175451	0.0162578	0.0159893	0.0180849	-0.00209562	Down	0.046813	NC	No	No	No	No
Greb1l	0.0110411	0.008827	0.00896007	0.0110091	0.00664542	0.00712343	0.0122347	0.0123422	0.0115524	0.0127386	0.00784906	0.00944074	0.00893436	0.0110263	-0.00209192	Down	0.002333	NC	Yes	No	Yes	No
Fam107b	0.0085736	0.00894459	0.00581439	0.00876151	0.00535024	0.0023608	0.0129612	0.00894004	0.00619935	0.0110267	0.00699586	0.00618867	0.00663419	0.00871863	-0.00208444	Down	0.034985	NC	No	No	Yes	No
Capn3	0.00106973	0.000855402	0.000615691	0.00398988	0.00136901	0.00474373	0.00355865	0.0030227	0.00128507	0.00964674	0.00186003	0.00569344	0.00210724	0.00417777	-0.00207053	Down	0.047212	NC	No	No	No	No
Nsun4	0.00555003	0.00942643	0.00552609	0.00919112	0.0112273	0.00928615	0.00761763	0.0125918	0.0105293	0.00972076	0.0115303	0.0105724	0.00836786	0.010427	-0.00205917	Down	0.036775	NC	No	No	No	No
Ccnb1	0.00145782	0.000209261	0.000316362	0.00420215	0.00122653	0.00218695	0.0044178	0.000590519	0.000391583	0.00842251	0.00382049	0.00420318	0.00159984	0.00364101	-0.00204117	Down	0.025083	NC	No	No	No	No
Fam49a	0.00113261	0.000508355	0.000435712	0.000423609	0.000435104	0.000613186	0.00511634	0.00107769	0.0018196	0.00219551	0.000458749	0.0050855	0.00059143	0.00262557	-0.00203414	Down	0.040329	NC	Yes	Yes	Yes	No
Kpna2	0.00833626	0.0141567	0.0142057	0.0160852	0.00753277	0.00902986	0.0127305	0.0160855	0.0177807	0.0178646	0.00824285	0.00871965	0.0115577	0.0135706	-0.0020129	Down	0.037039	NC	No	No	No	No
Mtap	0.0157305	0.0141716	0.0167096	0.0141438	0.0158837	0.0152498	0.0161251	0.015316	0.0200446	0.0142707	0.0187175	0.0193647	0.0153148	0.0173064	-0.00199161	Down	0.032258	NC	No	No	No	No
Man2b2	0.00972263	0.0102885	0.013575	0.0118688	0.00969274	0.0108741	0.0126664	0.0140073	0.0144085	0.0121523	0.0120188	0.0126835	0.0110036	0.0129895	-0.00198585	Down	0.012946	NC	No	No	No	No
Fancf	0.00905475	0.00602101	0.00750794	0.0128632	0.0110606	0.0105651	0.00953818	0.00927965	0.012292	0.0133943	0.0120062	0.0123507	0.0095121	0.0114768	-0.00196474	Down	0.038744	Down	No	No	No	No
Phldb2	0.0519952	0.0611763	0.0543308	0.0607829	0.0787708	0.0700591	0.0557028	0.0634248	0.0559021	0.0603297	0.0796	0.0737741	0.0628525	0.0647889	-0.00193643	Down	0.034183	NC	Yes	No	Yes	No
1700030F04Rik	0.00828786	0.00805419	0.0123039	0.0106294	0.00958564	0.00990731	0.00806263	0.00919755	0.0163877	0.0130472	0.0126059	0.0109749	0.00979472	0.0117126	-0.00191793	Down	0.029279	NC	No	No	No	No
Gm3448	0.00457001	0.0040242	0.0051147	0.00552095	0.00564066	0.008424	0.00851823	0.00504846	0.00694897	0.00474427	0.0071319	0.0123713	0.00554909	0.00746052	-0.00191143	Down	0.04956	NC	No	No	No	No
Rfx1	0.0113381	0.0108619	0.0134661	0.0135937	0.011428	0.0118697	0.0142151	0.0119101	0.0161484	0.0143538	0.0143107	0.0129173	0.0120929	0.0139759	-0.001883	Down	0.00648	NC	No	Yes	No	No
Xndc1	0.00756312	0.00621825	0.00695634	0.0081333	0.00823032	0.00595959	0.0117935	0.00901758	0.00810891	0.00783059	0.0110774	0.00649283	0.00717682	0.00905346	-0.00187664	Down	0.042366	NC	No	No	No	No
Ctgf	0.00250175	0.000541073	0.000750316	0.000712619	0.000837641	0.000790274	0.00507681	0.000917806	0.000716701	0.00224994	0.00314445	0.00520384	0.00102228	0.00288492	-0.00186265	Down	0.037257	NC	Yes	No	No	No
Gpr119	0.00401605	0.00380903	0.00189871	0.00301481	0.00541934	0.00456479	0.00520425	0.00593079	0.00439216	0.00353546	0.00932476	0.00525256	0.00378712	0.00560666	-0.00181954	Down	0.017922	NC	No	Yes	No	No
Tgm2	0.00119609	0.000889004	0.00177389	0.00120909	0.00119353	0.00180119	0.00403493	0.00287827	0.0019884	0.00220276	0.00206	0.00581412	0.0013438	0.00316308	-0.00181928	Down	0.025569	NC	No	No	No	No
Prpsap1	0.0345144	0.0260047	0.0372085	0.0340312	0.0335915	0.0365703	0.0344096	0.0302068	0.0393061	0.034024	0.0353293	0.0395558	0.0336534	0.0354719	-0.0018185	Down	0.045564	NC	No	No	No	Yes
Ift43	0.01244	0.0097399	0.0107561	0.00796227	0.0105245	0.0118887	0.0151453	0.0119567	0.0111822	0.0123526	0.0102853	0.0131947	0.0105519	0.0123528	-0.00180092	Down	0.046153	NC	Yes	No	No	No
Khsrp	0.0431305	0.0482775	0.0511781	0.0383172	0.0429796	0.0437014	0.0448648	0.0483091	0.0536824	0.0402533	0.0443494	0.0468514	0.0445974	0.0463851	-0.00178769	Down	0.009185	Down	No	No	No	No
Topbp1	0.00906205	0.006812	0.00844779	0.00701596	0.00683811	0.00695853	0.0102458	0.0102359	0.00831255	0.00997441	0.00931062	0.00776736	0.00752241	0.00930777	-0.00178536	Down	0.024917	NC	No	No	No	No
Agrn	0.00532279	0.00379812	0.00466999	0.00238951	0.00403431	0.00528551	0.00958441	0.00304554	0.00584761	0.00454646	0.00549701	0.00748012	0.00425004	0.00600019	-0.00175015	Down	0.046833	NC	Yes	No	No	No
Ttll1	0.0053103	0.00480895	0.007662	0.00638355	0.00470904	0.005043	0.00756399	0.00613307	0.0104634	0.00658723	0.0073863	0.00605011	0.00565281	0.00736401	-0.00171121	Down	0.009756	NC	No	No	No	No
Nxn	0.0263375	0.0192674	0.0211801	0.0162201	0.0272776	0.0225445	0.025962	0.0220777	0.0234258	0.0181461	0.0288522	0.0244256	0.0221379	0.0238149	-0.00167703	Down	0.013031	NC	No	No	No	No
Ldhb	0.0166504	0.00965951	0.0109239	0.0113614	0.0118304	0.00925158	0.0189915	0.0112804	0.0150256	0.0115408	0.0117926	0.0110205	0.0116129	0.0132752	-0.00166239	Down	0.043609	NC	No	No	No	No
Ctse	0.00162885	0.00103262	0.000888235	0.000650228	0.00114209	0.000552491	0.00258992	0.00473476	0.00184224	0.00361203	0.00193359	0.000758297	0.000982419	0.00257847	-0.00159605	Down	0.037647	NC	No	No	No	No
Spa17	0.00446881	0.00513526	0.00502357	0.00812911	0.00669551	0.00772524	0.00831387	0.00740056	0.00543682	0.00902231	0.00759693	0.008855	0.00619625	0.00777091	-0.00157467	Down	0.029054	NC	No	No	No	No
Ctla2a	0.000716033	0.000176405	0.0027437	0.00116652	0.000875712	0.000323354	0.00178122	0.000115954	0.00479128	0.00254116	0.00365293	0.00229539	0.00100029	0.00252965	-0.00152937	Down	0.012268	NC	Yes	No	No	No
Mis18a	0.00353498	0.00201028	0.000807828	0.00557152	0.00522879	0.00359297	0.00354655	0.0032573	0.00437217	0.00673524	0.0064571	0.00539521	0.00345773	0.00496059	-0.00150287	Down	0.025313	NC	Yes	No	Yes	No
Myc	0.00381197	0.00391382	0.00211828	0.00486944	0.00335492	0.00467688	0.00402037	0.00607952	0.00430251	0.00710047	0.00333684	0.00692156	0.00379088	0.00529355	-0.00150266	Down	0.019949	NC	Yes	No	No	No
Cep350	0.00419629	0.0035172	0.00536681	0.00427781	0.00665531	0.00527111	0.00676467	0.00575161	0.00692852	0.00437626	0.00887658	0.00554458	0.00488075	0.0063737	-0.00149295	Down	0.018575	NC	No	No	Yes	No
Pik3cd	0.000568564	0.000828223	0.0019893	0.00199849	0.000998078	0.00169751	0.00361367	0.00223358	0.00208337	0.00491524	0.00219103	0.00198326	0.00134669	0.00283669	-0.00149	Down	0.034014	NC	No	No	No	No
Evpl	0.00438809	0.00269318	0.00574966	0.00445485	0.00464805	0.00304705	0.00641598	0.00425518	0.00555615	0.00561788	0.0080667	0.00395653	0.00416348	0.00564474	-0.00148126	Down	0.029957	NC	No	Yes	No	No
Itgal	0.000616525	0.000228463	0	0.000534915	0.000687779	0	0.00137153	0.00299864	0.00017093	0.00367002	0.00189828	0.000678308	0.000344614	0.00179795	-0.00145334	Down	0.03245	NC	No	Yes	No	No
Kl	0.00658067	0.00625255	0.00645742	0.00864412	0.00726041	0.0108456	0.00735794	0.00870775	0.00644171	0.0101144	0.00929371	0.0128418	0.00767347	0.00912622	-0.00145275	Down	0.011873	NC	Yes	Yes	No	No
Parvg	0	3.91189e-05	5.64117e-05	0.000246629	0.000330633	0	0.00258403	0.00263763	0	0.00263453	0.000188811	0.00133023	0.000112132	0.00156254	-0.00145041	Down	0.039984	NC	Yes	Yes	Yes	Yes
Sgol1	0.00129898	0.000267256	0.00140541	0.000972675	0.00106398	0.00134966	0.00265384	0.00139469	0.00174302	0.00292609	0.00427495	0.00197793	0.00105966	0.00249509	-0.00143543	Down	0.019451	NC	No	No	No	No
Aqp4	0.00530451	0.00476813	0.00406188	0.00490277	0.0113719	0.0124786	0.00552343	0.0048494	0.00501447	0.00731406	0.0128476	0.0159078	0.00714797	0.00857613	-0.00142816	Down	0.043508	NC	No	No	No	Yes
Setd6	0.00939111	0.00694615	0.010804	0.0115643	0.0115923	0.00965282	0.00993257	0.00863062	0.0107305	0.0147712	0.0137194	0.010706	0.00999177	0.0114151	-0.00142328	Down	0.031242	NC	No	No	No	No
Milr1	0.0022111	0.00178936	0.00236946	0.00209486	0.00115559	0.000998362	0.00509576	0.0036129	0.00337137	0.00231048	0.00193091	0.002811	0.00176979	0.00318874	-0.00141895	Down	0.014578	NC	No	No	No	No
Gpr162	0.00279167	0.00207297	0.00196491	0.00193944	0.00157365	0.00300363	0.00491164	0.00263751	0.00353949	0.00428205	0.00199949	0.00447232	0.00222438	0.00364042	-0.00141604	Down	0.006941	NC	No	No	No	No
Msh5	0.00462503	0.00442817	0.00325766	0.00241103	0.00633098	0.00389553	0.00544441	0.00564715	0.00483308	0.00505699	0.00734157	0.00489382	0.00415807	0.00553617	-0.0013781	Down	0.004046	NC	No	No	No	No
Patl2	0.0015158	0.000783467	0.00117191	0.00100392	0.00142207	0.00311159	0.00217979	0.00266469	0.00227775	0.00377526	0.00363803	0.00267397	0.00150146	0.00286825	-0.00136679	Down	0.034764	NC	No	No	No	No
Wdr55	0.00240673	0.00239501	0.00152822	0.0028617	0.00217807	0.00202723	0.00557355	0.00438967	0.00317873	0.00348802	0.00159074	0.00335439	0.00223283	0.00359585	-0.00136302	Down	0.046755	NC	No	No	No	No
Arhgap31	0.00227173	0.000893631	0.000308404	0.000960695	0.00102668	0.00125201	0.00455092	0.00313225	0.00134753	0.00197305	0.00195641	0.00189811	0.00111886	0.00247638	-0.00135752	Down	0.005483	NC	Yes	Yes	No	No
Hspa12b	0.00289045	0.00167886	0.00156407	0.00120712	0.00284049	0.0016676	0.00425404	0.00317031	0.00261368	0.00389647	0.00291537	0.00308278	0.00197477	0.00332211	-0.00134734	Down	0.011112	NC	No	No	No	No
Kif18b	0.000606448	6.83491e-05	0	0.00101149	0.001123	0.000171666	0.00261195	0.000728144	9.65975e-05	0.00336394	0.00329108	0.000902839	0.000496825	0.00183243	-0.0013356	Down	0.018525	NC	No	No	No	No
Cenpf	0.00047875	6.47382e-05	0	0.00197736	0.00050901	0.00135166	0.00301157	0.000464184	0.000278116	0.00357036	0.00188766	0.00314183	0.000730254	0.00205895	-0.0013287	Down	0.012866	NC	No	No	No	No
Pla2g2d	0.00271276	0.0040534	0.00104116	0.00457385	0.0038259	0.00415541	0.0028361	0.0041017	0.00349414	0.00768697	0.00464664	0.00556158	0.00339375	0.00472119	-0.00132744	Down	0.048059	NC	No	No	No	No
Aspm	0.000498052	0.00046504	0.000371824	0.000528014	0.000651989	0.000453037	0.00294428	0.00020856	0.000763904	0.00328809	0.00189758	0.00180113	0.00049466	0.00181726	-0.0013226	Down	0.037978	NC	No	No	No	No
Zfp385a	0.00101969	0.000274124	0.000550084	0.0013271	0.000609743	0.000724198	0.00302584	0.00236923	0.000772935	0.0040248	0.000890718	0.00134302	0.000750824	0.00207109	-0.00132027	Down	0.029507	NC	No	No	No	No
Synpo2	0.00709163	0.00855172	0.00927893	0.00395831	0.00464759	0.00558849	0.0098219	0.0106856	0.00894078	0.00409628	0.00650947	0.00697576	0.00651944	0.0078383	-0.00131886	Down	0.042171	NC	No	Yes	No	No
Rab32	8.57674e-05	0.000344138	0.000111431	0.000691491	0.000368658	5.00747e-05	0.00319629	0.000931307	0.000488171	0.00321729	0.000425854	0.0012342	0.00027526	0.00158218	-0.00130692	Down	0.049445	NC	No	No	No	Yes
Rhov	0.00151649	0.000685832	0.00209504	0.000994513	0.000700839	0.000865282	0.00327474	0.000481071	0.00285046	0.00215144	0.00241684	0.00351076	0.001143	0.00244755	-0.00130455	Down	0.02223	NC	Yes	No	No	No
Slc25a10	0.00250389	0.00196562	0.00342471	0.0023523	0.00391232	0.00359267	0.00401915	0.00283964	0.00593748	0.00342527	0.00479477	0.00455145	0.00295858	0.00426129	-0.00130271	Down	0.004118	NC	No	No	No	No
Got2	0.0575976	0.0622096	0.0644647	0.0576422	0.0646055	0.0644718	0.059706	0.0636169	0.0639404	0.0598289	0.065038	0.06667	0.0618319	0.0631334	-0.00130146	Down	0.036672	NC	Yes	No	No	Yes
Ppil1	0.00634113	0.00611446	0.00988779	0.00763663	0.0079615	0.00879666	0.00597725	0.00792099	0.0122396	0.00798072	0.00984978	0.0105569	0.0077897	0.00908753	-0.00129784	Down	0.030001	NC	No	Yes	No	No
Shpk	0.00462345	0.00387326	0.00519586	0.0072922	0.00677403	0.0056627	0.00669424	0.00583773	0.0070053	0.00635403	0.00832428	0.00689855	0.00557025	0.00685235	-0.0012821	Down	0.038778	NC	No	No	No	No
Fzd6	0.00181185	0.00471401	0.00363293	0.00280671	0.00513749	0.00444236	0.00337396	0.00645998	0.00408884	0.00346081	0.00791177	0.00491954	0.00375756	0.00503582	-0.00127826	Down	0.019283	NC	No	No	No	No
Hlx	0.000425427	0	0.000182511	9.56642e-05	0.000260783	0.000564799	0.00155497	0.000769621	0.00276338	0.002476	0.000639195	0.000991746	0.000254864	0.00153248	-0.00127762	Down	0.023484	NC	Yes	No	No	Yes
Zfp518b	0.00462865	0.00508302	0.00404029	0.00359659	0.005511	0.00371552	0.00510876	0.0075305	0.00450281	0.00508178	0.00563671	0.0062588	0.00442918	0.00568656	-0.00125738	Down	0.033758	NC	No	No	No	Yes
Tmem29	0.00482335	0.00396715	0.00443583	0.00502345	0.00424597	0.00664706	0.00501055	0.00442762	0.00695857	0.00667483	0.00558549	0.00800102	0.00485714	0.00610968	-0.00125254	Down	0.014882	Up	No	No	No	No
Nusap1	0.00374263	0.00220456	0.00147745	0.00378389	0.00285711	0.00309364	0.00444805	0.00225886	0.00181252	0.00612484	0.00481331	0.00501826	0.00285988	0.00407931	-0.00121943	Down	0.027453	NC	Yes	No	No	No
Nin	0.00688124	0.00549207	0.0036643	0.00727702	0.00756954	0.00626912	0.00779618	0.00681727	0.00510495	0.00800325	0.00999031	0.00646881	0.00619221	0.00736346	-0.00117125	Down	0.012744	NC	Yes	No	No	No
Obfc1	0.0035331	0.00305117	0.00307344	0.00219542	0.00397724	0.00359716	0.00463363	0.00594168	0.00321424	0.00322386	0.00479146	0.00459008	0.00323792	0.00439916	-0.00116124	Down	0.026758	NC	No	No	No	No
Fanca	0.00213557	0.00126518	0.0021071	0.00420785	0.00157297	0.00154259	0.00439953	0.0011875	0.00427678	0.00570235	0.00222545	0.00200321	0.00213855	0.00329914	-0.00116059	Down	0.031722	NC	No	No	No	No
Eri2	0.00137464	0.00154983	0.00085908	0.000904157	0.00147515	0.000858631	0.00153221	0.00262678	0.00222028	0.00335737	0.00151843	0.00250168	0.00117025	0.00229279	-0.00112254	Down	0.030085	NC	No	No	No	No
Setdb2	0.00496377	0.00311824	0.00208131	0.00244953	0.00355718	0.00225931	0.00526225	0.00429877	0.00369509	0.00356094	0.00427135	0.00399791	0.00307156	0.00418105	-0.0011095	Down	0.004067	NC	No	No	No	No
Rhoh	0.00031781	0.000173245	6.4568e-05	0.000518165	0.000232438	0.00103766	0.00188713	0.00176142	9.65975e-05	0.00305254	0.000460887	0.00167495	0.000390647	0.00148892	-0.00109827	Down	0.038196	NC	Yes	No	No	No
Il2ra	0.000663988	0.000189763	0.00033069	0.000377395	9.38243e-05	0.000381789	0.00234165	0.00180532	0.000632483	0.000924906	0.00224747	0.000553277	0.000339575	0.00141752	-0.00107794	Down	0.025381	NC	No	No	No	Yes
Gprc6a	0.00293096	0.0031497	0.0035066	0.0027211	0.00320236	0.00329558	0.00331549	0.00490347	0.00367026	0.00422499	0.00443868	0.00466766	0.00313438	0.00420343	-0.00106904	Down	0.009617	NC	No	No	No	No
Anxa11	0.0057371	0.00499317	0.00573315	0.00491625	0.00654746	0.00621987	0.00774362	0.00615561	0.00749107	0.0044775	0.00742418	0.00715056	0.00569117	0.00674042	-0.00104925	Down	0.030376	NC	No	No	No	No
Otoa	0.00624799	0.00700692	0.0044278	0.0066253	0.00934037	0.0106859	0.00651358	0.00697669	0.00674107	0.00806456	0.0099333	0.0122735	0.00738906	0.00841711	-0.00102806	Down	0.037646	NC	No	No	No	No
Stamos	0.0020497	0.000912329	0.0013418	0.00100358	0.00195498	0.00281384	0.00332079	0.0018261	0.00214167	0.00306754	0.00226731	0.00361713	0.00167937	0.00270676	-0.00102738	Down	0.008164	NC	No	No	No	No
Fam234b	0.0152424	0.0150621	0.0172411	0.0169697	0.0160709	0.0134988	0.0161817	0.0169539	0.0185414	0.0164941	0.0178723	0.0141534	0.0156808	0.0166995	-0.00101863	Down	0.035757	NC	No	No	No	No
Mas1	0.000336127	0.000635834	0.000497489	0.00061896	0.000649103	0.000592555	0.00214179	0.00150001	0.00113895	0.000791266	0.00134239	0.00244494	0.000555011	0.00155989	-0.00100488	Down	0.0151	NC	No	No	No	No
Fam89a	0.00182881	0.00127353	0.00154458	0.00217266	0.00224742	0.00190675	0.00278366	0.00264133	0.00344237	0.00386608	0.00243507	0.00178412	0.00182896	0.00282544	-0.000996477	Down	0.030636	NC	No	No	No	No
Bid	0.00383196	0.00292969	0.00206958	0.00191782	0.00410264	0.00529893	0.00364389	0.00406925	0.00431885	0.00282504	0.0050823	0.0061327	0.00335844	0.00434534	-0.000986901	Down	0.026655	NC	No	No	No	No
Shmt1	0.00310254	0.00240458	0.003353	0.00452341	0.0028919	0.00414036	0.00464227	0.00348597	0.00409882	0.00511963	0.00445883	0.00448698	0.00340263	0.00438208	-0.000979452	Down	0.005051	NC	No	No	No	No
Fer1l5	0.00343888	0.00554845	0.00399382	0.0043695	0.00212729	0.00372947	0.00585446	0.00565444	0.00449235	0.00607341	0.00312063	0.00388442	0.0038679	0.00484662	-0.000978715	Down	0.048426	NC	No	No	No	No
Arhgap33	0.00361932	0.0054094	0.00636963	0.00392164	0.00358457	0.00315724	0.00431417	0.00667246	0.00709027	0.00603688	0.0042251	0.00354215	0.00434363	0.0053135	-0.000969871	Down	0.013042	NC	No	No	No	No
E330020D12Rik	0.00174592	9.21284e-05	5.22418e-05	0	0.000197644	5.24698e-05	0.00288176	0.00152791	0.00227534	0.000878446	0.000255588	0.000124363	0.000356734	0.0013239	-0.000967167	Down	0.035956	NC	No	No	No	No
Fcna	0.0018647	0.000926321	0.00155906	0.001041	0.00178765	0.00232581	0.0032716	0.00281756	0.00153005	0.00125133	0.00371259	0.00272279	0.00158409	0.00255098	-0.000966894	Down	0.042943	NC	No	No	No	No
Gm4767	0.00244301	0.00151233	0.00136731	0.00307035	0.00173544	0.00270152	0.00376287	0.00313876	0.00297716	0.00343651	0.00268039	0.00223994	0.00213833	0.00303927	-0.000900946	Down	0.042953	NC	No	No	No	No
Cldn10	0.000420675	0.00028947	6.82874e-05	0.000140463	0.000592116	0.000686599	0.000775367	0.000107119	0.0023406	0.00126365	0.00142595	0.0015894	0.000366268	0.00125035	-0.00088408	Down	0.04688	NC	No	Yes	No	No
Mertk	0.00169957	0.00191222	0.00205763	0.00151971	0.00228829	0.0020934	0.00348246	0.00216955	0.00346917	0.00287361	0.00280902	0.00205544	0.00192847	0.00280988	-0.000881406	Down	0.031907	NC	No	No	No	No
Gm6277	0.000546349	9.61833e-05	0.000683136	0.000203673	0.00140149	0.00108794	0.00288778	0.000856082	0.000464189	0.000804632	0.00246387	0.00181484	0.000669794	0.00154857	-0.000878772	Down	0.049708	NC	No	No	No	No
Nsun5	0.00319771	0.00208858	0.00299523	0.00272471	0.00248138	0.00187591	0.00492069	0.00260574	0.00332541	0.00336898	0.00382297	0.00255778	0.00256059	0.0034336	-0.000873009	Down	0.01067	NC	No	No	No	No
Arhgap11a	0.0020952	0.000858364	0.00126195	0.00305028	0.000802231	0.000872375	0.004271	0.00186022	0.00163262	0.00319951	0.00191402	0.0012766	0.00149007	0.00235899	-0.000868928	Down	0.035266	NC	No	No	No	No
Muc1	0.00105008	0.00017385	0.00136338	0.000542432	0.000868153	0.00104734	0.000874373	0.00247737	0.00235349	0.00144735	0.00155382	0.00152145	0.000840874	0.00170464	-0.000863767	Down	0.049245	NC	No	No	No	No
Rmi2	0.00183843	0.00106981	0.00223621	0.00135476	0.00155807	0.00157122	0.00248859	0.00213491	0.00351212	0.00228986	0.002274	0.00204196	0.00160475	0.00245691	-0.000852157	Down	0.000876	NC	No	No	No	Yes
Clcn2	0.00140643	0.000987805	0.000605158	0.00126971	0.000978979	0.00127488	0.00329602	0.00223793	0.00162336	0.0014212	0.00130354	0.00166824	0.00108716	0.00192505	-0.000837886	Down	0.027949	NC	No	No	No	No
Olfr110	0	7.93147e-05	0	0.000499663	0	0	0.00151261	0.00059314	0.00104941	0.00237952	0	0	9.64962e-05	0.000922446	-0.00082595	Down	0.049938	NC	No	No	No	No
Rhbdl2	0.00120724	0.00166036	0.00094884	0.000499423	0.00131583	0.00214754	0.00181078	0.00230569	0.00295493	0.00128489	0.00155217	0.00282578	0.00129654	0.00212237	-0.000825836	Down	0.020776	NC	No	No	No	No
Clec4a1	0.000759432	5.30223e-05	0	0.000349343	0.000232181	5.22225e-05	0.00235166	0.00130316	0.00010763	0.0011455	0.000577528	0.000868655	0.000241034	0.00105902	-0.000817987	Down	0.014875	NC	No	No	No	No
Fhad1os2	0.00198334	0.00169644	0.00115259	0.00232014	0.00256909	0.00189446	0.0041434	0.002124	0.00154808	0.0034906	0.00296757	0.00217176	0.00193601	0.0027409	-0.00080489	Down	0.044208	NC	No	No	No	No
Phactr4	0.0243125	0.0241014	0.0304438	0.0282547	0.0286808	0.0280267	0.0252755	0.0257994	0.0308645	0.029348	0.0282096	0.0289447	0.0273033	0.0280736	-0.000770295	Down	0.049804	NC	No	No	No	No
Chrna4	0.000884213	0.000671928	0.000650075	0.00100368	0.0023732	0.00135006	0.00187977	0.00200692	0.00130671	0.001443	0.00337711	0.00139829	0.00115553	0.00190197	-0.000746439	Down	0.010728	NC	No	No	No	No
Sh3d21	0.00523445	0.0049703	0.00470645	0.00505452	0.00677622	0.00718879	0.00641375	0.00603068	0.00581056	0.00585243	0.00645448	0.00775623	0.00565512	0.00638635	-0.000731232	Down	0.024641	NC	No	No	Yes	No
Ccdc62	0.00144357	0.0011876	0.00196199	0.00116751	0.00107843	0.000762384	0.00127206	0.00261957	0.00274549	0.00151774	0.0019484	0.00187479	0.00126691	0.00199634	-0.000729429	Down	0.025706	NC	No	No	No	No
Gzmm	0.00154949	0.00142192	0.000647274	0.00114094	0.000918842	0.00101231	0.00242683	0.00265537	0.00142101	0.00161317	0.00205519	0.000884191	0.00111513	0.00184262	-0.000727497	Down	0.016009	Up	No	No	No	No
Perm1	0.00247544	0.00255127	0.00125192	0.00294058	0.00364285	0.00198151	0.00344308	0.00360315	0.00199157	0.00377852	0.00303924	0.00332831	0.00247393	0.00319731	-0.00072338	Down	0.04854	NC	No	No	No	No
Elavl2	0.000516329	0.000559029	0.00121238	0.00204386	0.00102028	0.00067587	0.000871869	0.00218991	0.00190852	0.00249025	0.000946974	0.00195818	0.00100462	0.00172762	-0.000722992	Down	0.037414	NC	No	No	No	No
Rab26	0.00110854	0.000650962	0.000232478	0.00127426	0.000850873	0.000775608	0.00120281	0.00206473	0.00075678	0.00213056	0.00211152	0.000886845	0.000815454	0.00152554	-0.000710086	Down	0.027398	NC	No	No	No	No
Rnf17	0.00140642	0.000848776	0.00104078	0.000729991	0.000846968	0.000653004	0.00134933	0.0012455	0.00264169	0.00162389	0.00107389	0.00183186	0.000920991	0.00162769	-0.000706703	Down	0.039821	NC	No	No	No	No
Mcoln2	0.000740741	0.00553937	8.40776e-05	0.00117655	0.000378648	0.00128611	0.00188365	0.00551675	0.000655478	0.00211747	0.00100034	0.00219485	0.00153425	0.00222809	-0.000693842	Down	0.008982	NC	No	Yes	No	No
Asb11	0.0014613	0.000826316	0.00130823	0.00134242	0.0016923	0.00219373	0.00307096	0.00115785	0.00163403	0.00248664	0.00205098	0.0025442	0.00147072	0.00215744	-0.000686728	Down	0.028982	NC	No	No	No	No
Hdac10	0.00222985	0.00353461	0.00347248	0.00321799	0.00308868	0.00304593	0.00296738	0.00364487	0.00474675	0.00371055	0.0043052	0.00324223	0.00309826	0.0037695	-0.000671242	Down	0.02139	NC	No	No	No	No
Lancl3	0.00247304	0.00141818	0.000691611	0.000860239	0.00152633	0.00143599	0.0026249	0.00164666	0.00208395	0.00118093	0.00297111	0.00175566	0.0014009	0.00204387	-0.00064297	Down	0.047792	NC	No	No	No	Yes
Nsg1	0.0015185	0.00133854	0.000957592	0.00288852	0.00170225	0.00168247	0.0023048	0.00257558	0.00176629	0.0026945	0.00283009	0.00177329	0.00168131	0.00232409	-0.00064278	Down	0.040391	NC	No	No	No	No
Diras2	0.000925374	0.000663226	0.000667345	0.000411564	0.000809161	0.000699044	0.00227052	0.000959972	0.00147319	0.000899571	0.00123782	0.000893125	0.000695952	0.00128903	-0.00059308	Down	0.018613	NC	Yes	No	No	Yes
Gm3550	0.000755134	0.00148068	0.00024297	0.000558477	0.000671137	0.000928344	0.00122974	0.00265077	0.00100259	0.00138146	0.000486801	0.00131795	0.00077279	0.00134489	-0.000572097	Down	0.029065	NC	No	No	No	No
Cecr2	0.000670179	0.000933908	0.00067308	0.00245943	0.000623069	0.00103034	0.000797021	0.0012008	0.000615418	0.00356847	0.00138491	0.00169317	0.001065	0.0015433	-0.000478296	Down	0.044733	NC	No	No	No	No
Gm11131	0.00210893	0.00244265	0.00247635	0.00117334	0.00170757	0.00145559	0.00234254	0.00326291	0.00267322	0.0015699	0.00201634	0.00225957	0.00189407	0.00235408	-0.00046001	Down	0.010246	NC	No	No	No	No
Tfec	0.000542219	0.000588293	0.000557246	0.000703708	0.00292664	0.000325456	0.0013515	0.000529743	0.00118555	0.00149028	0.00305964	0.000727905	0.000940594	0.00139077	-0.000450176	Down	0.026983	NC	No	Yes	Yes	No
Pla1a	0.00134935	0.00259927	0.0014943	0.00222771	0.00160646	0.00154497	0.00118812	0.00304736	0.0019379	0.0027303	0.00187674	0.00173218	0.00180368	0.00208543	-0.000281754	Down	0.03875	NC	Yes	No	No	No
Nrn1	0.00211653	8.47561e-05	0.000352165	0	9.1659e-05	0	0.00234549	0.000323923	0.000468562	0.000514134	0.000540155	0	0.000440851	0.000698711	-0.00025786	Down	0.02286	NC	Yes	Yes	No	No
Trim34a	0.00301437	0.000799553	0.000806667	0.00184415	0.000552408	0.0010435	0.00247119	0.000427591	0.00080997	0.00143959	0.00050823	0.000885216	0.00134344	0.0010903	0.000253143	Up	0.036557	NC	No	No	No	No
Ccnjl	0.00179553	0.00305077	0.0026655	0.000954938	0.0018155	0.00250056	0.00188683	0.00251856	0.00203641	0.00098626	0.00133652	0.00191954	0.00213047	0.00178069	0.00034978	Up	0.045162	NC	No	No	Yes	No
Ccr7	0.00011178	0.00378847	0.000279525	0.000711641	0.000360747	0.00038991	0	0.00304629	0.000221723	0	0	0	0.000940345	0.000544668	0.000395677	Up	0.020053	NC	Yes	No	No	No
Gxylt2	0.00130475	0.00109718	0.00250392	0.0013799	0.00153682	0.00111627	0.000662687	0.000927302	0.00184313	0.00111283	0.0009335	0.00107967	0.00148981	0.00109319	0.000396621	Up	0.016113	Down	No	No	No	No
Gm12718	0.00216253	0.00192724	0.00288125	0.00213222	0.00100743	0.000489083	0.00203823	0.00111629	0.00208028	0.00148552	0.00082194	0.000504688	0.00176662	0.00134116	0.000425467	Up	0.037003	NC	No	No	No	No
Fam216a	0.00136271	0.00262041	0.00118651	0.00203488	0.00216736	0.00132786	0.000746985	0.00219849	0.000494339	0.00166825	0.0018568	0.00115743	0.00178329	0.00135371	0.000429573	Up	0.002915	NC	No	No	No	No
Bank1	0.00253571	0.00347598	0.00193702	0.00240555	0.00160225	0.00166999	0.00171678	0.00263565	0.00195851	0.0017456	0.00146439	0.00147923	0.00227109	0.00183336	0.000437724	Up	0.036771	NC	No	No	No	No
Zfp939	0.0069624	0.00542685	0.00529988	0.00625708	0.00630278	0.00601721	0.00692676	0.00519482	0.00436411	0.00622768	0.00522735	0.00539834	0.00604436	0.00555651	0.000487856	Up	0.047453	NC	No	No	No	No
Zfy1	0.0026704	0.00262058	0.00345497	0.00287807	0.00173118	0.00171354	0.00267726	0.00233355	0.00275234	0.00183561	0.000971021	0.00147262	0.00251146	0.00200707	0.00050439	Up	0.025551	NC	No	Yes	No	Yes
Neto2	0.00231548	0.00090594	0.001327	0.00210131	0.00134603	0.00178536	0.00143873	0.000272267	0.000813117	0.00174144	0.00119988	0.00127197	0.00163019	0.0011229	0.000507287	Up	0.003982	NC	No	No	No	No
Gm10269	0.00126205	0.00210497	0.00153657	0.00127929	0.000770214	0.00087865	0.00138736	0.00102525	0.000742936	0.000855898	0.000287526	0.000486816	0.00130529	0.000797631	0.00050766	Up	0.028417	NC	No	No	No	No
A2m	0.00156179	0.00114062	0.00153444	0.00205612	0.00158466	0.00110908	0.000677215	0.00120577	0.000940163	0.00139558	0.000634648	0.000998987	0.00149779	0.000975395	0.000522391	Up	0.026952	Up	No	No	No	No
Krtap16-1	0.00234925	0.00354165	0.00205834	0.00130983	0.00121547	0.00257907	0.00159007	0.00251057	0.0018255	0.000988461	0.000858713	0.00213552	0.0021756	0.00165147	0.00052413	Up	0.008696	NC	No	No	No	No
Tox2	0.00219903	0.0012712	0.00207729	0.000481534	0.000996028	0.00116662	0.00123029	0.000838591	0.00173695	0.000331466	0.000516063	0.000392967	0.00136528	0.000841056	0.000524228	Up	0.007639	NC	No	No	Yes	No
Gm11592	0.00202907	0.00175658	0.00266357	0.0022394	0.00308028	0.003559	0.00136386	0.00205085	0.00142021	0.00155726	0.00276163	0.00287732	0.00255465	0.00200519	0.000549465	Up	0.04576	NC	No	No	No	No
Angptl3	0.00254258	0.00148101	0.00236618	0.000723931	0.00168943	0.00129695	0.00119486	0.00101047	0.00201686	0.00061605	0.00156735	0.000342608	0.00168335	0.0011247	0.000558647	Up	0.039601	NC	No	No	No	No
Ormdl2	0.00150806	0.00233222	0.00242535	0.00205259	0.00132217	0.00401345	0.000785681	0.00217322	0.00141161	0.00169645	0.00124505	0.00292895	0.00227564	0.00170683	0.000568813	Up	0.0237	NC	No	No	No	No
Bend3	0.00320222	0.00313918	0.00465897	0.00411235	0.00407486	0.00325597	0.00252325	0.00204411	0.00371971	0.00430747	0.00353055	0.00289817	0.00374059	0.00317055	0.000570044	Up	0.028742	Down	No	Yes	No	No
Mmel1	0.00250448	0.000792415	0.00211603	0.00199603	0.00115273	0.00139072	0.0012097	0.000864026	0.00171019	0.000981353	0.000800536	0.000924929	0.00165873	0.00108179	0.000576946	Up	0.035356	NC	Yes	No	No	No
AA986860	0.00138612	0.00278986	0.00245332	0.00135009	0.00199115	0.00168538	0.000269892	0.0021518	0.00212557	0.00147107	0.00083276	0.00125956	0.00194265	0.00135177	0.000590879	Up	0.031953	NC	No	No	No	No
Ppef2	0.00351413	0.00212004	0.0030559	0.00359742	0.00485844	0.00255559	0.00290413	0.00163191	0.00277795	0.003106	0.00330081	0.00243072	0.00328359	0.00269192	0.000591667	Up	0.034763	NC	No	Yes	No	No
Eme2	0.00358983	0.00467721	0.00593744	0.00378274	0.0026112	0.00267969	0.00306576	0.00456033	0.00439666	0.00287249	0.00213181	0.00266837	0.00387968	0.00328257	0.000597113	Up	0.048113	NC	No	No	No	No
Gfra4	0.00237787	0.00148648	0.00169144	0.00277072	0.001497	0.000860213	0.00102441	0.0016343	0.000754404	0.0018646	0.00123816	0.000506635	0.00178062	0.00117042	0.000610202	Up	0.041875	NC	Yes	No	No	No
Jmjd4	0.00306921	0.00161264	0.00279934	0.00236524	0.00287044	0.00229014	0.00288817	0.00146992	0.00164358	0.00193941	0.0020442	0.00134988	0.00250117	0.00188919	0.000611974	Up	0.016299	NC	No	No	No	No
Svopl	0.00221305	0.00274887	0.00255814	0.00171997	0.00149995	0.00196321	0.000760047	0.00216366	0.00214708	0.00171714	0.000897693	0.00126528	0.0021172	0.00149182	0.000625384	Up	0.023253	NC	No	No	No	No
Glra2	0.00141623	0.0022669	0.00109041	0.00157477	0.000270454	0.000865151	0.00080447	0.00119294	0.000697311	0	0.000131742	0.000868958	0.00124732	0.000615903	0.000631416	Up	0.049186	NC	No	No	No	No
9330159M07Rik	0.00169601	0.00182649	0.00173797	0.00158251	0.00203712	0.00206538	0.00104519	0.001147	0.00107937	0.000824161	0.00172977	0.00130345	0.00182425	0.00118816	0.000636092	Up	0.000248	NC	No	No	No	No
Stard6	0.00320882	0.00413363	0.00219212	0.00386884	0.00285562	0.0029625	0.00291078	0.0026802	0.00207439	0.00276475	0.00235424	0.0025046	0.00320359	0.00254816	0.000655429	Up	0.026013	NC	No	No	No	No
Rap1gapos	0.00159236	0.00218269	0.00240987	0.00356647	0.00316298	0.00344182	0.00161287	0.00176595	0.00146148	0.00308588	0.00203975	0.00245616	0.00272603	0.00207035	0.000655685	Up	0.014493	NC	No	No	No	No
Depdc7	0.00177865	0.00257779	0.000981648	0.00193201	0.00259999	0.0033664	0.00145794	0.00127327	0.00123348	0.00134658	0.00169464	0.00219521	0.00220608	0.00153352	0.000672562	Up	0.036378	NC	No	No	No	No
Cdh10	0.00117891	0.00166313	0.001106	0.00220058	0.000710367	0.00145572	0.000853523	0.000743338	0.000791674	0.00118058	0.000205411	0.000421554	0.00138578	0.000699347	0.000686438	Up	0.004479	NC	No	Yes	No	No
Sowahb	0.00247475	0.00196014	0.00289869	0.00206837	0.00162613	0.00338448	0.00136417	0.000691605	0.00249831	0.00159251	0.00123252	0.00290015	0.00240209	0.00171321	0.000688882	Up	0.007761	NC	Yes	Yes	No	No
B4galt4	0.0054406	0.00311492	0.00336262	0.00506862	0.00439732	0.00357353	0.00406598	0.00335248	0.00287457	0.00427076	0.00298141	0.00327801	0.0041596	0.00347053	0.000689068	Up	0.046618	NC	No	No	No	No
Agap2	0.0037036	0.00559844	0.00322667	0.00442212	0.00224196	0.00278734	0.00192321	0.00481685	0.00325792	0.00376876	0.0021446	0.0019228	0.00366335	0.00297235	0.000690999	Up	0.047667	NC	No	No	No	No
Rab11fip4	0.00232928	0.00313219	0.00266901	0.00363659	0.00154683	0.00219367	0.00184433	0.00227168	0.00171331	0.00201861	0.0017601	0.00168823	0.00258459	0.00188271	0.000701885	Up	0.03685	NC	No	No	Yes	No
Cphx3	0.00333305	0.00518802	0.00748487	0.00473428	0.00187729	0.00244323	0.00314746	0.00415574	0.00562417	0.0040663	0.00128869	0.00241513	0.00417679	0.00344958	0.000727209	Up	0.043008	NC	No	No	No	No
C230014O12Rik	0.00228989	0.0017938	0.000300881	0.00223343	0.000305547	0.00107542	0.000698328	0.000661532	0.000328596	0.00125109	0.000463198	0.000196946	0.00133316	0.000599948	0.000733213	Up	0.047165	NC	No	No	No	No
4930447C04Rik	0.000570701	0.00158074	0.00237683	0.000877101	0.000784051	0.00135726	0.00061984	0.000477794	0.000667612	0.000638852	0.000574806	0.000159862	0.00125778	0.000523128	0.000734654	Up	0.049573	NC	No	Yes	No	Yes
P2rx3	0.00242919	0.00168755	0.00131632	0.00158644	0.0020591	0.00206014	0.00213274	0.00175004	0.00011311	0.000405973	0.000756113	0.0015619	0.00185646	0.00111998	0.000736476	Up	0.024955	NC	No	No	No	No
Scarf2	0.00101493	0.00267229	0.00411802	0.0024436	0.00255526	0.0035961	0.000865853	0.00183157	0.00333474	0.00161464	0.00189902	0.00241377	0.00273337	0.00199327	0.000740099	Up	0.003038	NC	No	No	Yes	Yes
Aloxe3	0.00181517	0.00207712	0.00429899	0.00341464	0.0030157	0.00271857	0.0010764	0.000613061	0.00330363	0.00324333	0.00195959	0.00269027	0.00289003	0.00214771	0.000742317	Up	0.021435	NC	No	No	No	No
Gm13025	0.00437307	0.00344658	0.0046901	0.00388928	0.00317998	0.00636838	0.00359704	0.00363654	0.00398659	0.00278817	0.00238394	0.00503491	0.00432457	0.0035712	0.00075337	Up	0.016417	NC	No	No	No	No
Gm13599	0.00252136	0.00240986	0.00189965	0.00263793	0.0016102	0.00337657	0.00114595	0.00241929	0.000859436	0.00174452	0.00176369	0.00199656	0.00240926	0.00165491	0.000754353	Up	0.041145	NC	No	No	No	No
Gm17435	0.00207267	0.00204076	0.00253294	0.00197199	0.0018087	0.00205504	0.000816763	0.00211903	0.0015292	0.0011347	0.00127806	0.00102068	0.00208035	0.00131641	0.000763946	Up	0.011213	NC	No	No	No	No
Fcor	0.00218544	0.00108017	0.0018401	0.00148038	0.000788981	0.00169359	0.000878978	0.000355532	0.000863125	0.000741779	0.000730506	0.000867573	0.00151144	0.000739582	0.000771862	Up	0.005833	NC	No	No	No	No
4930471D02Rik	0.00218932	0.00153616	0.00129991	0.00179394	0.00129926	0.000657848	0.000859902	0.000842796	0.000863029	0.000235691	0.00058215	0.000752664	0.00146274	0.000689372	0.000773367	Up	0.025226	NC	No	No	No	No
Ybey	0.0062625	0.00588618	0.00499073	0.00451831	0.00690995	0.00563269	0.00444587	0.00519701	0.00412771	0.00433481	0.0065052	0.00492794	0.00570006	0.00492309	0.000776969	Up	0.01982	NC	No	No	No	No
Gm20752	0.00127699	0.00184596	0.00244589	0.00144849	0.000525588	0.00145123	0.000747422	0.00102555	0.000824964	0.000702032	0.000592767	0.000360254	0.00149902	0.000708831	0.000790193	Up	0.018504	NC	No	No	No	No
Crisp2	0.00363204	0.00346198	0.00606666	0.0025091	0.00378903	0.00305454	0.0031266	0.00323916	0.00413167	0.00174099	0.00381953	0.00168936	0.00375222	0.00295789	0.000794339	Up	0.046084	NC	No	No	No	No
Hectd2	0.00293395	0.00299314	0.00144599	0.00187809	0.0012881	0.0013637	0.00124867	0.00202459	0.000741506	0.00167135	0.00081228	0.000606914	0.00198383	0.00118422	0.00079961	Up	0.011738	NC	Yes	Yes	Yes	No
Acsf2	0.00259472	0.00173288	0.00172242	0.00220605	0.00112923	0.00120787	0.000452317	0.000719408	0.00154265	0.0015119	0.000667981	0.000893075	0.00176553	0.000964555	0.000800973	Up	0.04164	NC	No	No	No	No
Gm26763	0.00105625	0.00308309	0.00178134	0.00369232	0.00156121	0.00205261	0.00072971	0.00174034	0.00187738	0.00183654	0.00113432	0.00105378	0.00220447	0.00139535	0.000809125	Up	0.04075	NC	No	No	No	No
Ppp1r14c	0.00170793	0.00350646	0.00232062	0.00231197	0.0015493	0.0011774	0.00161277	0.00256173	0.000971565	0.000720221	0.000789363	0.000996594	0.00209561	0.00127537	0.000820238	Up	0.021007	NC	No	No	No	No
Eya4	0.00234527	0.00405092	0.00220691	0.00307457	0.00170475	0.00190843	0.00245209	0.00250196	0.00134657	0.00185199	0.00144161	0.000771063	0.00254847	0.00172755	0.000820928	Up	0.023813	NC	No	No	No	Yes
Pole	0.00105835	0.00232058	0.001933	0.00230373	0.000845234	0.00108169	0.000944971	0.000324829	0.0018788	0.000823773	0.000337552	0.000245953	0.00159043	0.000759313	0.000831116	Up	0.04672	NC	No	No	No	No
Il20rb	0.0022988	0.00236074	0.00308637	0.00304975	0.00275864	0.00286734	0.00209355	0.00129623	0.00275261	0.000842255	0.00234387	0.00204553	0.00273694	0.00189567	0.000841265	Up	0.039291	NC	No	Yes	No	No
Ltk	0.00157403	0.00243186	0.00139487	0.00242815	0.00127552	0.00262531	0.00141753	0.000525826	0.000433383	0.00189855	0.00110299	0.00128799	0.00195496	0.00111104	0.000843911	Up	0.030847	NC	No	No	No	No
Gm20635	0.00221177	0.00320116	0.00266858	0.00193209	0.00198218	0.00196564	0.00129014	0.00176867	0.00116136	0.00164974	0.00194098	0.00107517	0.0023269	0.00148101	0.000845893	Up	0.017336	Up	No	No	No	No
Tagln3	0.00201394	0.00268078	0.00317558	0.00431004	0.00186622	0.00107994	0.00176069	0.0010861	0.00130921	0.00333151	0.00131957	0.00124282	0.00252108	0.00167498	0.0008461	Up	0.045973	NC	No	No	No	No
Apobec2	0.0040659	0.00289504	0.00207227	0.00273422	0.00177512	0.00209664	0.00231081	0.00250164	0.00167584	0.0016341	0.00143144	0.000957732	0.00260653	0.00175193	0.000854602	Up	0.014606	NC	No	Yes	No	No
Oprd1	0.00202434	0.00133577	0.00200643	0.000472339	0.00104909	0.000413271	5.30597e-05	7.59372e-05	0.00106571	0.000147282	0.000526208	0.000279473	0.00121687	0.000357946	0.000858927	Up	0.027364	NC	Yes	No	No	Yes
Nkapl	0.00306279	0.00220394	0.00334088	0.00330653	0.00347692	0.00384823	0.00303204	0.00197712	0.00196462	0.00250682	0.00266016	0.00183222	0.00320655	0.00232883	0.000877717	Up	0.032658	NC	No	No	No	No
Hdc	0.00425072	0.00732822	0.00455439	0.00463277	0.00374265	0.00286671	0.00364089	0.00636072	0.00368596	0.00338506	0.00196254	0.00303081	0.00456258	0.00367766	0.000884915	Up	0.020738	NC	No	No	No	Yes
1700001K19Rik	0.00398307	0.00367628	0.00612387	0.00309029	0.0037804	0.00469222	0.00267351	0.0027403	0.00602693	0.000956655	0.00371052	0.00391848	0.00422435	0.00333773	0.000886623	Up	0.038682	NC	No	Yes	No	No
Ciz1	0.00205965	0.00128312	0.00343989	0.00202997	0.00279718	0.00184584	0.00139482	0.000960028	0.00116329	0.00108461	0.00185534	0.00160798	0.00224261	0.00134434	0.000898266	Up	0.030801	NC	No	No	No	No
Rpain	0.00483989	0.00332791	0.00315329	0.00587633	0.00465556	0.00379401	0.00371384	0.00285957	0.00305587	0.00428088	0.00359949	0.00270736	0.0042745	0.0033695	0.000904999	Up	0.008889	NC	No	Yes	No	No
Myo19	0.00145409	0.00210364	0.00318137	0.00331147	0.00149309	0.00251074	0.00157781	0.00114444	0.00122931	0.00176676	0.00135168	0.00148236	0.0023424	0.00142539	0.000917007	Up	0.036961	NC	No	No	No	No
Cdh20	0.00555349	0.00799204	0.00763325	0.00636996	0.0053843	0.00822771	0.00562963	0.00717438	0.00677135	0.00459361	0.0052597	0.00620656	0.00686012	0.00593921	0.000920919	Up	0.044733	NC	Yes	No	No	Yes
Adcy2	0.00340045	0.00432072	0.00529182	0.0044777	0.00296931	0.0022283	0.00179708	0.00229423	0.00412437	0.00384281	0.00333045	0.00177161	0.00378138	0.00286009	0.000921293	Up	0.046719	NC	Yes	Yes	Yes	No
4930429F24Rik	0.00468474	0.00502332	0.00549256	0.00372927	0.00524893	0.00506857	0.00399098	0.00410357	0.00513566	0.00276895	0.0043042	0.003349	0.00487457	0.00394206	0.000932508	Up	0.003822	NC	No	No	No	No
Actr8	0.031791	0.0367581	0.0336444	0.0325856	0.0370443	0.0339825	0.0305944	0.0359713	0.0320638	0.0310768	0.0374982	0.0329988	0.034301	0.0333672	0.000933784	Up	0.027659	NC	No	No	No	No
Dffa	0.0178621	0.0142194	0.0182307	0.0211152	0.0198097	0.0230922	0.01731	0.0138539	0.0183051	0.0193885	0.0189992	0.0208018	0.0190549	0.0181097	0.000945142	Up	0.04831	NC	No	No	No	No
A930012L18Rik	0.00858847	0.00755704	0.0112546	0.00717657	0.00856663	0.00561993	0.0084397	0.00752823	0.00937425	0.00630478	0.00749135	0.00394456	0.0081272	0.00718048	0.00094672	Up	0.028674	NC	No	No	No	No
Rad54l	0.00497648	0.00511536	0.00466278	0.00355889	0.00389784	0.0044999	0.00380075	0.00313586	0.00320181	0.00349066	0.00368698	0.00365375	0.00445187	0.00349497	0.000956907	Up	0.024378	NC	No	No	No	No
Tas1r1	0.00273748	0.0014961	0.00305962	0.00305551	0.00238393	0.00177083	0.00195064	0.00102344	0.00207746	0.000850268	0.000888206	0.00182447	0.00241725	0.00143575	0.000981499	Up	0.028779	NC	No	No	No	No
Amigo3	0.00712289	0.00928566	0.013076	0.00881049	0.00361331	0.00855184	0.00594761	0.00840287	0.0129915	0.00778943	0.00345375	0.00598446	0.00841003	0.00742826	0.000981765	Up	0.044159	NC	No	Yes	No	No
Ccdc96	0.00227552	0.00163654	0.00250156	0.00255845	0.00101246	0.00233118	0.00182958	0.000383366	0.00170449	0.00107572	0.00125754	0.0001636	0.00205262	0.00106905	0.00098357	Up	0.035569	NC	No	No	No	Yes
Lpcat4	0.00371279	0.00333411	0.00316485	0.00352562	0.00228937	0.00322056	0.00340741	0.00217117	0.00170856	0.00240446	0.00160592	0.00203994	0.00320788	0.00222291	0.000984972	Up	0.002133	NC	No	No	No	No
Gm15698	0.00290916	0.00407678	0.00252761	0.001641	0.00338798	0.00369276	0.00164821	0.00180982	0.00142737	0.00177019	0.00208418	0.00355643	0.00303921	0.00204937	0.000989848	Up	0.038718	Up	No	No	No	No
Tet1	0.00378704	0.0016754	0.00444921	0.00245871	0.00347052	0.00299506	0.001675	0.00200117	0.00354072	0.00170338	0.00234309	0.00160612	0.00313932	0.00214491	0.000994413	Up	0.029059	NC	No	Yes	Yes	No
Kiss1r	0.00190051	0.00193934	0.00309102	0.000725223	0.00153721	0.00204189	0.00117523	0.000925064	0.00121193	0.00123373	0.000253464	0.000450297	0.00187253	0.000874954	0.000997577	Up	0.03388	NC	No	No	No	No
Nubpl	0.015795	0.0143066	0.0116633	0.0136718	0.015235	0.0135108	0.0141511	0.0125928	0.0112439	0.0123489	0.0137062	0.0140407	0.0140304	0.0130139	0.00101651	Up	0.038497	NC	No	No	No	No
Gm10643	0.00184212	0.00304955	0.0037999	0.00313532	0.0023356	0.00250026	0.00192892	0.0016022	0.00216965	0.00205664	0.00141396	0.00138181	0.00277713	0.00175886	0.00101826	Up	0.008885	NC	No	No	No	No
Ccdc183	0.00421064	0.00370777	0.00368953	0.00378093	0.00328344	0.00392813	0.00192455	0.00170788	0.00254565	0.00388801	0.00301227	0.0034018	0.00376674	0.00274669	0.00102005	Up	0.04885	NC	No	No	No	No
Pcdh7	0.00484408	0.00498543	0.00544225	0.00345883	0.00204514	0.00282323	0.00376454	0.00445242	0.00311511	0.00213336	0.00135565	0.00265218	0.00393316	0.00291221	0.00102095	Up	0.021504	NC	Yes	No	No	No
Efna2	0.00431997	0.00435816	0.00465119	0.00382156	0.0044224	0.00461317	0.00434789	0.00230587	0.00273687	0.00295551	0.0030936	0.00460209	0.00436441	0.00334031	0.0010241	Up	0.039376	NC	Yes	No	No	No
Gm11423	0.0065218	0.00576224	0.00651551	0.00552231	0.00486746	0.00558189	0.00499659	0.00605554	0.00529951	0.00438134	0.00398313	0.00388288	0.0057952	0.0047665	0.0010287	Up	0.016335	NC	No	No	No	No
Vars2	0.00412516	0.00332377	0.00501433	0.00440282	0.00324562	0.0031667	0.00227001	0.00317408	0.00373653	0.00226129	0.00287456	0.00266234	0.00387974	0.0028298	0.00104994	Up	0.027105	NC	Yes	No	No	No
Ankrd13c	0.0198687	0.0197668	0.01736	0.0204767	0.0197943	0.0205444	0.0193109	0.0194311	0.0156268	0.019946	0.0181915	0.0189668	0.0196351	0.0185789	0.00105627	Up	0.010112	NC	No	No	No	No
Gm16740	0.00242482	0.00250109	0.00522259	0.00209062	0.00317408	0.00270104	0.00225306	0.00179589	0.00285473	0.00178002	0.00128696	0.00169878	0.00301904	0.00194491	0.00107414	Up	0.030456	NC	No	No	No	No
Uba7	0.00390369	0.00627763	0.0041648	0.003214	0.00174645	0.00384054	0.00305641	0.00341214	0.00256628	0.00273537	0.00121278	0.00369491	0.00385785	0.00277965	0.0010782	Up	0.046546	NC	No	No	No	No
Slc5a3	0.00502947	0.00367177	0.00424519	0.00366406	0.00344372	0.00538647	0.00338999	0.00241141	0.00186	0.00259718	0.00274728	0.00592997	0.00424011	0.00315597	0.00108414	Up	0.042717	NC	No	No	No	No
Dbn1	0.00419422	0.00330957	0.00500951	0.00500923	0.0044711	0.00530203	0.00269558	0.00144312	0.00300853	0.00502386	0.00394875	0.00462715	0.00454928	0.00345783	0.00109145	Up	0.021893	NC	No	No	No	No
5930412G12Rik	0.000885489	0.00293039	0.00153561	0.00125241	0.000390292	0.000999262	0.00054237	0.000215884	0	0.000433328	0.000154007	0	0.00133224	0.000224265	0.00110798	Up	0.031533	NC	No	No	No	No
Gna14	0.00181217	0.00450667	0.00327999	0.00220503	0.00545719	0.00697107	0.0016328	0.00268903	0.00310232	0.00151077	0.00376147	0.00485281	0.00403869	0.00292487	0.00111382	Up	0.025597	NC	Yes	No	No	Yes
Sorbs3	0.00255504	0.00338322	0.00285918	0.00280583	0.00315809	0.00364794	0.00213134	0.0017441	0.00270347	0.00130619	0.00194742	0.00187419	0.00306822	0.00195112	0.0011171	Up	0.009655	NC	No	No	Yes	Yes
Mterf1a	0.00280554	0.00167113	0.00282706	0.00279923	0.00278454	0.00259993	0.00176834	0.000840122	0.00149129	0.00190902	0.00116853	0.00160283	0.00258124	0.00146336	0.00111788	Up	0.000266	NC	No	No	No	No
Polr3g	0.00915438	0.00745446	0.00676971	0.0114656	0.0118921	0.00873497	0.00797066	0.00714134	0.00573528	0.00869481	0.0105857	0.00854588	0.0092452	0.00811227	0.00113293	Up	0.030232	NC	No	No	No	No
Dtx1	0.00912506	0.00770124	0.00623383	0.00368076	0.00798191	0.00714297	0.00788447	0.00680532	0.00416132	0.00263832	0.00640421	0.00713427	0.00697763	0.00583799	0.00113964	Up	0.010188	Up	Yes	No	No	Yes
Entpd4	0.00470107	0.00523684	0.00519997	0.00420423	0.00643606	0.00566117	0.00327897	0.00453887	0.0059572	0.00211403	0.00460092	0.00406137	0.00523989	0.0040919	0.001148	Up	0.04338	NC	No	No	No	No
Rrp15	0.00955617	0.0119585	0.0113226	0.00920928	0.010703	0.00824808	0.00884965	0.0100351	0.00924042	0.00849442	0.00869631	0.00879092	0.0101663	0.00901781	0.00114847	Up	0.043126	NC	No	No	Yes	No
4930552N02Rik	0.00307338	0.00327384	0.00396042	0.00333823	0.00290413	0.0026097	0.00218957	0.00163144	0.00205832	0.00217115	0.00239625	0.00180737	0.00319328	0.00204235	0.00115093	Up	0.003181	NC	No	No	No	No
Gm10451	0.0029025	0.00234896	0.00145618	0.00575808	0.00476505	0.00733235	0.00107669	0.000993005	0.00149426	0.00311314	0.00395678	0.00700762	0.00409385	0.00294025	0.0011536	Up	0.036198	NC	No	No	No	No
Gm26737	0.00237914	0.00485113	0.00151172	0.00244782	0.00237874	0.002414	0.00105425	0.00264582	0.00160463	0.00159068	0.00150921	0.000644539	0.00266376	0.00150819	0.00115557	Up	0.01695	NC	No	No	No	No
Abhd11	0.00764711	0.00535767	0.00602157	0.00780261	0.00626949	0.00542132	0.00482464	0.00461503	0.00547775	0.00569668	0.00568849	0.00527934	0.00641996	0.00526366	0.0011563	Up	0.043783	NC	Yes	No	No	No
Ccdc85a	0.0066864	0.00727831	0.00954099	0.00608789	0.00558653	0.00689368	0.00573774	0.00631564	0.00826925	0.00567968	0.00310799	0.00590649	0.0070123	0.00583613	0.00117617	Up	0.009062	NC	No	No	No	No
Snhg17	0.00527683	0.00742725	0.00646318	0.00710384	0.0070507	0.00688892	0.00514545	0.00595529	0.00601916	0.00520851	0.00537494	0.00541742	0.00670179	0.00552013	0.00118166	Up	0.009926	NC	No	No	No	No
Trp53rkb	0.0108455	0.00895675	0.0096881	0.00865954	0.00847276	0.00930198	0.00803858	0.00881256	0.00823391	0.00785862	0.00799882	0.00788634	0.00932077	0.00813814	0.00118263	Up	0.028211	NC	No	No	No	No
Cdk15	0.00322924	0.0049881	0.0047393	0.00392075	0.00402979	0.00562703	0.00356933	0.00362225	0.0034569	0.00192231	0.00248846	0.00437141	0.00442237	0.00323844	0.00118393	Up	0.014795	NC	Yes	No	No	No
Cep78	0.0251219	0.0165693	0.0183083	0.0151261	0.0148881	0.0130477	0.0237549	0.0148338	0.015309	0.0152937	0.0141003	0.0126468	0.0171769	0.0159898	0.00118714	Up	0.047961	NC	No	No	No	No
Lrriq3	0.00956036	0.00782933	0.00912176	0.00797498	0.00633784	0.00443804	0.0076916	0.00693833	0.00755917	0.00608672	0.00565934	0.00415211	0.00754372	0.00634788	0.00119584	Up	0.007269	NC	No	No	No	No
Tbc1d2	0.00249455	0.00337742	0.0044723	0.0034579	0.00467943	0.00402306	0.00285734	0.00223314	0.00229737	0.00137882	0.00256143	0.00400144	0.00375078	0.00255492	0.00119585	Up	0.04883	NC	Yes	Yes	Yes	No
Scube2	0.00253474	0.00320763	0.00136537	0.00366993	0.00168955	0.00371911	0.000806188	0.00170656	0.000990471	0.00192176	0.0022768	0.00129112	0.00269772	0.00149882	0.00119891	Up	0.044383	NC	No	No	No	No
Gm14325	0.00189669	0.00492664	0.00312795	0.00132203	0.00223572	0.00217879	0.00125283	0.00293773	0.00114522	0.00114959	0.000894421	0.00102169	0.00261463	0.00140025	0.00121439	Up	0.009283	NC	No	Yes	No	No
Zfp628	0.00735769	0.0106637	0.00946872	0.00817356	0.00607707	0.0080234	0.00669263	0.00855641	0.00704405	0.00705031	0.00608067	0.00701537	0.00829403	0.00707324	0.00122079	Up	0.021418	NC	No	Yes	No	No
Dnajc28	0.00359626	0.00260447	0.00408788	0.00437971	0.00368946	0.00469731	0.00274685	0.0014302	0.00147901	0.00295198	0.00333228	0.00378448	0.00384252	0.0026208	0.00122172	Up	0.011467	NC	No	No	No	No
Tubd1	0.00375636	0.00506742	0.0040051	0.00499964	0.00385346	0.0049597	0.00268857	0.00362105	0.00225391	0.00340399	0.00269126	0.00461743	0.00444028	0.0032127	0.00122758	Up	0.001894	NC	No	No	No	No
Tmem120b	0.00647872	0.00774012	0.00848774	0.00625072	0.00702329	0.00660907	0.0067426	0.00682341	0.0064224	0.00473028	0.00667376	0.00380919	0.00709828	0.00586694	0.00123133	Up	0.044042	NC	No	No	No	No
1700007K13Rik	0.00477666	0.0031815	0.00328669	0.00319335	0.00233304	0.00444598	0.00315257	0.00280268	0.000402493	0.00236576	0.00194951	0.00314461	0.0035362	0.00230294	0.00123326	Up	0.024459	NC	No	No	No	No
Flt3l	0.00560971	0.0068042	0.00820997	0.00978399	0.0051252	0.00712269	0.00604579	0.00566339	0.00571607	0.008036	0.00472565	0.00490323	0.00710929	0.00584836	0.00126094	Up	0.040378	NC	No	No	No	No
Kcnd1	0.00560507	0.00532023	0.00889681	0.00568651	0.00741161	0.00796859	0.00551304	0.00477234	0.00585638	0.00526849	0.00546018	0.00645154	0.0068148	0.00555366	0.00126114	Up	0.040127	NC	No	No	No	No
Mrap2	0.00558683	0.00560958	0.00625229	0.0033917	0.00647256	0.00816452	0.00433817	0.00556406	0.00441505	0.00319668	0.00330626	0.00708279	0.00591291	0.0046505	0.00126241	Up	0.043293	NC	No	No	No	No
Mtfmt	0.00612452	0.0067162	0.00613774	0.00638218	0.00687699	0.00671033	0.004695	0.00403799	0.00662224	0.00512982	0.00554785	0.00530723	0.00649133	0.00522336	0.00126797	Up	0.027672	NC	No	No	No	No
Fdxr	0.00728664	0.00660793	0.00717155	0.00553051	0.00627832	0.00933332	0.00453969	0.00505846	0.00530754	0.00591803	0.00565144	0.00807706	0.00703471	0.0057587	0.00127601	Up	0.033421	NC	No	No	No	No
Bcam	0.00416389	0.00375764	0.00504923	0.0052872	0.0043473	0.00528231	0.00294059	0.00298659	0.00269191	0.00520279	0.00288324	0.00351361	0.00464793	0.00336979	0.00127814	Up	0.010749	NC	No	No	Yes	No
Znrd1as	0.00500412	0.00637738	0.00629997	0.00720259	0.00597482	0.00787222	0.00295929	0.00621853	0.00469449	0.00693194	0.00500463	0.00500672	0.00645518	0.00513593	0.00131925	Up	0.028033	NC	No	No	No	No
Zfp442	0.00378003	0.00513221	0.00376465	0.00339403	0.00249223	0.00379282	0.00221085	0.00264794	0.00370109	0.00206722	0.00206452	0.00172158	0.00372599	0.0024022	0.00132379	Up	0.017777	NC	No	No	No	No
Tubb4a	0.00697687	0.00853397	0.0112403	0.00534691	0.00708031	0.00639523	0.00635405	0.00636842	0.00931218	0.00453372	0.00738454	0.00359721	0.00759559	0.00625835	0.00133724	Up	0.036256	NC	No	No	No	No
Unc5a	0.00608623	0.00503033	0.00463599	0.00608726	0.00448225	0.00380366	0.00375814	0.0038847	0.00217171	0.00481643	0.0040526	0.0032966	0.00502095	0.00366337	0.00135759	Up	0.012479	NC	Yes	Yes	No	No
BC049730	0.00285659	0.00170625	0.00289548	0.00446061	0.00420619	0.0064538	0.00213168	0.00130952	0.00150586	0.00158837	0.00310512	0.00478185	0.00376315	0.00240373	0.00135942	Up	0.012298	NC	No	No	No	No
Snapc1	0.0124624	0.00809677	0.01178	0.0114177	0.0122462	0.0137919	0.0104827	0.00624452	0.0110239	0.0103947	0.012668	0.0107863	0.0116325	0.0102667	0.00136581	Up	0.036693	NC	No	No	No	No
2700046G09Rik	0.00787747	0.00568395	0.00742781	0.00828814	0.00828953	0.00905219	0.00737846	0.00376938	0.00755093	0.00508985	0.007598	0.00701797	0.00776985	0.00640076	0.00136908	Up	0.041112	NC	No	No	No	No
Zfp768	0.0072834	0.00890332	0.006915	0.00810359	0.00907246	0.00874178	0.0065457	0.00700407	0.00508873	0.00702374	0.00769573	0.00735828	0.00816992	0.00678604	0.00138388	Up	0.000594	NC	No	Yes	No	No
Zkscan8	0.00575511	0.0059581	0.00487486	0.00778485	0.00675461	0.00610161	0.0049381	0.00604786	0.00264595	0.00483759	0.0044187	0.0060229	0.00620486	0.00481852	0.00138634	Up	0.045868	NC	No	No	No	No
Acd	0.00934074	0.00856081	0.00817207	0.0098859	0.00541563	0.00748957	0.00746023	0.00700736	0.00747932	0.00910114	0.00444918	0.00504924	0.00814412	0.00675774	0.00138638	Up	0.004475	NC	No	No	No	No
Zfp580	0.00755686	0.00713423	0.00632579	0.00762139	0.00596726	0.00513728	0.00630874	0.00448512	0.00476489	0.00627298	0.00588969	0.0036627	0.0066238	0.00523069	0.00139311	Up	0.008846	NC	No	No	No	No
A730017L22Rik	0.00994325	0.00783386	0.00622004	0.00668107	0.0107601	0.00845315	0.00805513	0.00525069	0.00601174	0.00486885	0.00887135	0.00844101	0.00831525	0.00691646	0.00139878	Up	0.02151	NC	No	No	No	No
Polg2	0.0439137	0.0354411	0.0508956	0.033514	0.0335915	0.0283377	0.0433816	0.0344668	0.0487471	0.0323165	0.0318647	0.0264601	0.0376156	0.0362061	0.00140946	Up	0.002425	Up	No	No	No	No
a	0.00671337	0.00882053	0.00499916	0.00555138	0.00399573	0.00809519	0.00619491	0.00670518	0.00406015	0.00508767	0.00271769	0.00493304	0.00636256	0.00494977	0.00141279	Up	0.02149	NC	No	No	No	No
Cfap46	0.0152994	0.0180018	0.02095	0.0172557	0.0129797	0.0182345	0.0141474	0.0190513	0.0184057	0.0151078	0.0108175	0.0166615	0.0171202	0.0156985	0.00142163	Up	0.044607	NC	No	No	No	No
Blm	0.009493	0.00844155	0.00999149	0.0108841	0.00854008	0.00773846	0.00845935	0.00849671	0.00731837	0.00814063	0.00722943	0.00690698	0.00918145	0.00775858	0.00142287	Up	0.024523	NC	No	Yes	No	No
Mthfd2l	0.0131284	0.0130903	0.0147118	0.0119615	0.0125424	0.0102542	0.0136119	0.0123118	0.012122	0.00900989	0.0104553	0.00959733	0.0126148	0.0111847	0.00143007	Up	0.045791	NC	No	No	No	No
Tfpt	0.00379477	0.00424189	0.0067818	0.00409395	0.00324909	0.0035201	0.00260366	0.00258115	0.00426616	0.0029146	0.00233754	0.00235361	0.00428027	0.00284279	0.00143748	Up	0.001775	NC	No	No	No	No
Pard6g	0.0114538	0.010417	0.00649248	0.006723	0.00767057	0.0112479	0.00913627	0.00807349	0.00571886	0.006314	0.00669454	0.00943303	0.00900078	0.0075617	0.00143908	Up	0.008148	NC	Yes	Yes	No	No
Syngr3	0.00444974	0.00287199	0.00430931	0.00584441	0.00644693	0.00711472	0.00317532	0.00134703	0.00423238	0.00296716	0.00651699	0.00414662	0.00517285	0.00373092	0.00144193	Up	0.042905	NC	No	No	No	No
Gm16008	0.00669091	0.00450718	0.00228687	0.00217834	0.00181463	0.00244146	0.00460394	0.002165	0.000963075	0.00138054	0.000660531	0.00144098	0.0033199	0.00186901	0.00145089	Up	0.002295	NC	No	No	No	No
Jam2	0.00513282	0.0030967	0.00249716	0.00465483	0.00310412	0.00290497	0.00227979	0.00169675	0.00124175	0.00280631	0.00208355	0.0024618	0.0035651	0.00209499	0.0014701	Up	0.007092	NC	No	No	No	No
Plagl1	0.0042832	0.00546102	0.00509793	0.00548461	0.00515214	0.0034114	0.00335263	0.00314894	0.00283374	0.00256141	0.0044136	0.00371454	0.00481505	0.00333747	0.00147758	Up	0.031193	Down	Yes	No	No	No
Thnsl2	0.00493765	0.0070411	0.00702865	0.00560634	0.00403156	0.00735138	0.00305619	0.00573983	0.00671455	0.00306646	0.00397651	0.00455276	0.00599945	0.00451772	0.00148173	Up	0.024081	NC	No	No	No	Yes
Cgref1	0.00715224	0.00890901	0.00947358	0.00752994	0.00470604	0.00409048	0.00525464	0.006553	0.00990959	0.00443088	0.00292924	0.00384367	0.00697688	0.00548684	0.00149005	Up	0.040601	NC	No	No	No	No
Lrp2bp	0.00629459	0.00641718	0.00692028	0.00422887	0.00589032	0.00662174	0.00422188	0.00518801	0.00322035	0.00363607	0.00623361	0.00489218	0.00606216	0.00456535	0.00149681	Up	0.04502	NC	No	No	No	No
Cep250	0.00713833	0.00582138	0.00735348	0.00869868	0.00660188	0.00753793	0.00597045	0.00547685	0.00661716	0.0049162	0.00404384	0.00714521	0.00719195	0.00569495	0.00149699	Up	0.045529	NC	No	No	No	No
Aldh3b1	0.00409195	0.00328499	0.00547308	0.00546904	0.00302535	0.00468429	0.00263565	0.00239291	0.0033345	0.00389883	0.00204864	0.00271353	0.00433812	0.00283734	0.00150077	Up	0.000773	NC	No	No	No	No
Tmem194	0.00870463	0.00850654	0.00579158	0.00844219	0.00880487	0.00837979	0.00582178	0.00606112	0.0056734	0.00762253	0.00775986	0.00668557	0.00810493	0.00660404	0.00150089	Up	0.016734	NC	No	No	No	No
Xlr3b	0.00979579	0.0245646	0.0120352	0.0104907	0.00998783	0.0119395	0.00808449	0.0210814	0.0124246	0.00864936	0.00821909	0.0113378	0.0131356	0.0116328	0.00150282	Up	0.037317	NC	No	No	No	No
Meox1	0.00782265	0.00880006	0.00981227	0.00326928	0.0112735	0.0119326	0.00571961	0.00580281	0.00880772	0.00373568	0.00954505	0.0102749	0.00881839	0.00731429	0.0015041	Up	0.025103	NC	Yes	No	No	No
Cbln4	0.00198524	0.00235184	0.00248182	0.00505322	0.00146586	0.00193077	0.00106512	0.000184163	0.00226927	0.00108648	0.000486479	0.00113546	0.00254479	0.00103783	0.00150696	Up	0.042347	NC	No	Yes	Yes	Yes
Zfp563	0.00525699	0.00439174	0.00318946	0.00449848	0.00381487	0.00337685	0.00364432	0.00244121	0.00134232	0.00285948	0.00198662	0.00314613	0.00408807	0.00257001	0.00151805	Up	0.002186	NC	No	No	No	No
Tmem169	0.00471808	0.00693666	0.00765134	0.00520616	0.00440965	0.00471914	0.00353599	0.00445949	0.00469727	0.00310821	0.00506498	0.00363854	0.00560684	0.00408408	0.00152276	Up	0.034304	NC	No	No	No	No
Zfp213	0.00916029	0.00861393	0.00952944	0.00679534	0.00693099	0.00711176	0.00752597	0.00892871	0.00588998	0.0056799	0.00568355	0.00528107	0.00802363	0.0064982	0.00152543	Up	0.033158	NC	No	No	Yes	No
Gca	0.00730156	0.00561053	0.00505814	0.00820986	0.00465335	0.00547824	0.00573353	0.00420177	0.0039061	0.00489845	0.00431252	0.00410279	0.00605195	0.00452586	0.00152609	Up	0.012308	NC	No	No	No	No
Eif2d	0.0210478	0.0187971	0.0242897	0.0194212	0.0168051	0.0177188	0.0207576	0.0190433	0.0210994	0.0164489	0.015182	0.0163897	0.01968	0.0181535	0.00152647	Up	0.04271	NC	No	No	No	Yes
Snx32	0.0127666	0.00890858	0.0108841	0.0107795	0.00780219	0.00874848	0.0104433	0.0064602	0.00910237	0.0107263	0.00622218	0.00764695	0.00998157	0.00843355	0.00154802	Up	0.007779	NC	No	No	No	No
Mif4gd	0.0140972	0.0120299	0.0129928	0.0147561	0.017424	0.0160441	0.0138714	0.0109811	0.0116941	0.0140392	0.0131701	0.0142718	0.0145573	0.0130046	0.00155273	Up	0.04417	NC	No	No	No	No
Ccs	0.0165449	0.0178237	0.0188245	0.0161803	0.0156891	0.0157345	0.0166618	0.0171437	0.0167318	0.0148897	0.0127614	0.0132852	0.0167995	0.0152456	0.00155392	Up	0.021208	NC	No	No	No	No
Mboat1	0.00339464	0.00242925	0.00682998	0.00372866	0.00199404	0.00172823	0.00248858	0.00151889	0.00370633	0.00173608	0.000876129	0.000441102	0.0033508	0.00179452	0.00155628	Up	0.007023	NC	No	No	No	Yes
Enpep	0.0105326	0.0116501	0.0106301	0.0100073	0.00846354	0.00827436	0.0092345	0.0104657	0.00900777	0.00817624	0.00639456	0.00693161	0.00992632	0.00836839	0.00155793	Up	0.000105	NC	Yes	No	Yes	No
Cspg5	0.007129	0.0069631	0.00844108	0.00712187	0.00901667	0.00764687	0.00527445	0.00540768	0.00862047	0.00433844	0.00828142	0.00503717	0.00771977	0.00615994	0.00155983	Up	0.019668	NC	No	Yes	No	No
Chmp6	0.0103382	0.0130004	0.0146246	0.0133834	0.0105175	0.0143882	0.00797826	0.0109595	0.0144898	0.012184	0.00927953	0.0119952	0.0127087	0.0111477	0.00156102	Up	0.007235	NC	No	Yes	Yes	Yes
Cgrrf1	0.0289747	0.0247275	0.0305037	0.0275658	0.0309972	0.0190862	0.0277723	0.0237259	0.0274127	0.0275405	0.027403	0.0186053	0.0269759	0.0254099	0.00156592	Up	0.04514	NC	No	No	No	No
Slc2a1	0.00658604	0.00816372	0.0098672	0.00809903	0.00831539	0.00605873	0.00588047	0.00621418	0.00819575	0.00566765	0.00729083	0.00443526	0.00784835	0.00628069	0.00156766	Up	0.001641	NC	No	No	No	No
Acaa1b	0.0127691	0.0124694	0.0136568	0.0162543	0.00612403	0.00874215	0.0121777	0.0118156	0.0114482	0.0120959	0.00538288	0.00766131	0.0116693	0.0100969	0.00157237	Up	0.040489	NC	No	No	No	No
Vps45	0.0187808	0.0147321	0.0143196	0.0177824	0.01458	0.0146837	0.0164719	0.0129677	0.0134539	0.0148573	0.0126513	0.0150385	0.0158131	0.0142401	0.00157303	Up	0.021066	NC	No	No	No	No
Sftpd	0.00519753	0.00319549	0.00257688	0.00440475	0.00258731	0.00398156	0.0029064	0.00103695	0.00138218	0.00361101	0.00195721	0.00158594	0.00365726	0.00207995	0.00157731	Up	0.004679	NC	No	No	No	No
Gm5087	0.00710419	0.00560721	0.00397104	0.00668579	0.00529765	0.00880653	0.00480568	0.00451114	0.00244872	0.0049117	0.00455127	0.00668731	0.0062454	0.00465264	0.00159277	Up	0.001244	NC	No	No	No	No
Pla2g4c	0.00480224	0.00347273	0.0051977	0.00248679	0.00136208	0.00340293	0.00198495	0.00326869	0.00163115	0.00182431	0.00111068	0.00128867	0.00345408	0.00185141	0.00160267	Up	0.040774	NC	No	No	No	No
Dcun1d4	0.0121331	0.0175343	0.0185531	0.0158187	0.0179037	0.0166408	0.0106448	0.0132985	0.0176178	0.0146441	0.017809	0.0148402	0.0164306	0.0148091	0.00162156	Up	0.036896	Up	No	Yes	No	No
Gm42754	0.00929506	0.0111089	0.0119137	0.00974967	0.00950581	0.0108644	0.00615189	0.0103281	0.0117844	0.00848981	0.00662785	0.00930442	0.0104062	0.00878108	0.00162517	Up	0.01979	NC	No	No	No	No
Prr16	0.00695269	0.00408231	0.00359301	0.00622616	0.00241819	0.00225871	0.00357542	0.00317725	0.000714728	0.00441309	0.0018755	0.00201167	0.00425518	0.00262794	0.00162723	Up	0.026871	NC	No	Yes	No	Yes
Ppp1r3d	0.00956523	0.00993295	0.00903798	0.0128539	0.012342	0.0121338	0.00796869	0.00831461	0.00837252	0.00932996	0.0124591	0.00964777	0.0109776	0.00934877	0.00162887	Up	0.026989	NC	No	No	No	No
Rfc3	0.0109858	0.00831101	0.00861884	0.00980357	0.00758832	0.00875346	0.00908297	0.00538553	0.00838939	0.00697847	0.00576567	0.00859251	0.00901016	0.00736576	0.0016444	Up	0.020901	NC	No	No	No	No
Gm4353	0.00761366	0.00856353	0.00855574	0.00593353	0.00616164	0.00546626	0.00568091	0.00457543	0.00889219	0.00473724	0.00374675	0.00478575	0.00704906	0.00540305	0.00164602	Up	0.043233	NC	No	No	No	No
Vta1	0.0388556	0.0350123	0.0407904	0.0371369	0.0388294	0.039095	0.0380025	0.0345425	0.040146	0.0358964	0.035228	0.0360273	0.0382866	0.0366405	0.00164615	Up	0.030072	NC	No	No	No	No
Prim2	0.00905237	0.00825155	0.00942175	0.00846992	0.00557804	0.00470857	0.00681074	0.00694868	0.00752515	0.0059409	0.00474635	0.00362983	0.00758037	0.00593361	0.00164676	Up	0.001917	NC	No	No	No	No
Eif2ak4	0.0117169	0.0109311	0.0143159	0.0117368	0.0139596	0.0117982	0.0124753	0.00853491	0.0123076	0.0103488	0.0127311	0.00817918	0.0124097	0.0107628	0.00164694	Up	0.039365	NC	No	No	No	No
Ncoa7	0.0140858	0.018272	0.0136659	0.0126806	0.0240938	0.0187789	0.0122048	0.0181828	0.0122145	0.0110133	0.0233191	0.0147258	0.0169295	0.0152767	0.00165279	Up	0.02988	NC	Yes	No	No	No
Zfp2	0.00970794	0.00386171	0.00713159	0.00790924	0.0091546	0.0124487	0.0080039	0.00466245	0.00450432	0.00647568	0.00751173	0.00909207	0.00836896	0.00670836	0.0016606	Up	0.03427	NC	No	Yes	No	No
Zfp846	0.0121147	0.00785201	0.00892133	0.0101545	0.00892153	0.0076972	0.0100409	0.0040473	0.0061597	0.00970112	0.00896845	0.00674106	0.00927688	0.00760976	0.00166712	Up	0.039219	NC	No	No	No	No
Rccd1	0.00628042	0.00632697	0.00462471	0.00752473	0.00775679	0.00750523	0.00408192	0.00507983	0.00415336	0.00554416	0.00586727	0.00527683	0.00666981	0.00500056	0.00166924	Up	0.001895	NC	No	No	No	Yes
Fbxl7	0.00472933	0.00319813	0.00740582	0.00479118	0.00317834	0.00359261	0.00234711	0.00174477	0.0048358	0.00192814	0.00280486	0.00315632	0.00448257	0.00280283	0.00167973	Up	0.013168	NC	No	No	No	No
Trmt5	0.00697985	0.00624109	0.00702516	0.00717222	0.00576482	0.00578727	0.00349685	0.00517794	0.00454898	0.00590305	0.00636417	0.00335051	0.00649507	0.00480692	0.00168815	Up	0.033987	NC	No	No	No	No
Pofut1	0.01757	0.0159282	0.0148813	0.0149156	0.0193342	0.0165872	0.0180605	0.0122591	0.0137851	0.012391	0.0179814	0.0145721	0.0165361	0.0148415	0.00169454	Up	0.032128	NC	No	No	No	Yes
Xrcc3	0.0144931	0.0160689	0.0178695	0.0130214	0.0145977	0.0144441	0.0120207	0.012629	0.0159748	0.0136459	0.0118709	0.0141703	0.0150825	0.0133853	0.00169716	Up	0.044549	NC	No	Yes	No	No
Lmbrd2	0.00887995	0.00752605	0.00680782	0.00975166	0.00695407	0.00652753	0.00631996	0.00575288	0.00590773	0.00660829	0.00600527	0.0056553	0.00774118	0.00604157	0.00169961	Up	0.007816	NC	No	No	No	No
4930539E08Rik	0.0043032	0.00298541	0.00348437	0.00254999	0.00168732	0.0016201	0.00105477	0.000588846	0.00111993	0.0023954	0.000713189	0.000530247	0.00277173	0.00106706	0.00170467	Up	0.015031	NC	No	No	No	No
Xpo6	0.0337177	0.0251105	0.027372	0.0313594	0.0384054	0.0317818	0.0327522	0.0208495	0.0261212	0.0301677	0.0360896	0.0314146	0.0312911	0.0295658	0.00172533	Up	0.029017	NC	No	No	No	No
Slc52a2	0.00732374	0.00857023	0.00902163	0.00699057	0.00735766	0.00701604	0.00789669	0.00696782	0.00553154	0.00526442	0.00500136	0.00524208	0.00771331	0.00598398	0.00172933	Up	0.024239	NC	No	No	No	No
Aen	0.00515806	0.00458394	0.00439223	0.004347	0.00526986	0.0040834	0.00293822	0.00304233	0.00320102	0.00435636	0.00213082	0.00177658	0.00463908	0.00290755	0.00173153	Up	0.011386	NC	No	No	No	No
Nanos1	0.00820012	0.00959791	0.00639212	0.00548963	0.00616213	0.00562834	0.0048143	0.00684446	0.00479882	0.004028	0.00721554	0.00333996	0.00691171	0.00517352	0.00173819	Up	0.04008	NC	No	No	No	No
Elac2	0.0110432	0.0108866	0.0143851	0.0132181	0.0131957	0.0136983	0.00964777	0.0095627	0.0144678	0.0103119	0.0100696	0.0119292	0.0127378	0.0109982	0.00173968	Up	0.015093	NC	No	Yes	Yes	No
Pgam5	0.0192134	0.0225416	0.0208396	0.0212292	0.0233845	0.0209695	0.0184899	0.0207446	0.0163822	0.0208029	0.0217362	0.0195822	0.021363	0.019623	0.00173998	Up	0.031079	NC	No	No	No	No
Pls3	0.00665989	0.00759846	0.00674577	0.00786669	0.00620018	0.00354146	0.00520605	0.00668537	0.00379755	0.00360476	0.00535357	0.00350988	0.00643541	0.00469286	0.00174254	Up	0.041751	NC	No	No	Yes	No
AW551984	0.00366985	0.00703351	0.00466511	0.0052582	0.00185841	0.00249173	0.00373126	0.00552998	0.000556129	0.00201399	0.00113458	0.00153131	0.0041628	0.00241621	0.00174659	Up	0.044214	NC	No	No	No	No
Phex	0.0130206	0.0103491	0.0110553	0.0109277	0.00964275	0.00962433	0.0112399	0.010274	0.00847526	0.0104969	0.00843562	0.00520532	0.01077	0.00902117	0.00174881	Up	0.043155	NC	No	Yes	No	Yes
Cenpc1	0.0217855	0.0215134	0.0214464	0.0176104	0.019063	0.0152196	0.021608	0.0176645	0.0180331	0.0173074	0.0177624	0.013746	0.0194397	0.0176869	0.00175279	Up	0.039389	NC	No	No	No	No
Bik	0.00395825	0.00555739	0.00331229	0.00380978	0.00592452	0.00492529	0.00168134	0.00399306	0.00137667	0.0026351	0.00518247	0.00207446	0.00458125	0.00282385	0.0017574	Up	0.002412	Up	No	No	No	No
Plekhg5	0.00643848	0.00523371	0.00632635	0.00995425	0.00931174	0.00962893	0.00500595	0.00552034	0.00379125	0.00718129	0.0080129	0.00683422	0.00781558	0.00605766	0.00175792	Up	0.01575	NC	No	No	No	No
Gabpb1	0.0130766	0.015102	0.0122965	0.0153342	0.0151805	0.0127113	0.011318	0.0147109	0.0113586	0.0109053	0.0136648	0.0111653	0.0139502	0.0121872	0.00176301	Up	0.027242	NC	No	No	No	No
Ptcd1	0.00694541	0.00748904	0.00778386	0.0102362	0.00672425	0.0076694	0.00623134	0.00500575	0.00787921	0.00608167	0.00482967	0.00619495	0.00780803	0.0060371	0.00177093	Up	0.032289	NC	No	No	No	No
Adprhl2	0.0135979	0.0143296	0.0126376	0.0133542	0.0133057	0.0162828	0.0119743	0.0122561	0.0105975	0.0131414	0.0105677	0.0142921	0.013918	0.0121382	0.00177981	Up	0.003642	NC	No	No	Yes	No
4930593A02Rik	0.00242247	0.00629817	0.0048637	0.002739	0.00201918	0.00389607	0.00125397	0.00217107	0.00198822	0.00268486	0.00162562	0.00178516	0.00370643	0.00191815	0.00178828	Up	0.03728	NC	No	No	No	No
Clmp	0.00545047	0.00456685	0.00432062	0.00477227	0.00343814	0.00224788	0.00312665	0.0021508	0.00301009	0.00161035	0.00183531	0.00232236	0.0041327	0.00234259	0.00179011	Up	0.011326	NC	No	Yes	No	Yes
Siae	0.017988	0.0150728	0.0180556	0.0140422	0.016321	0.0162733	0.0141112	0.0147489	0.0170794	0.0120395	0.0157143	0.0133149	0.0162922	0.0145014	0.00179079	Up	0.026677	NC	No	No	No	No
Nmrk1	0.00452486	0.008283	0.00828264	0.00481617	0.00510543	0.00640562	0.00280005	0.00502652	0.00599501	0.00333233	0.00523896	0.00427937	0.00623629	0.00444537	0.00179092	Up	0.011351	Down	No	No	No	No
Rtp2	0.00149663	0.00569154	0.00441827	0.00327362	#REF!	0.00202982	0.000878722	0.00173966	0.00093928	0.00224765	#REF!	0.000340226	#REF!	#REF!	#REF!	Up	0.039942	NC	No	No	No	No
B3galt4	0.00508766	0.00571633	0.00501005	0.00503717	0.00500074	0.00547908	0.00224986	0.00336865	0.00317259	0.00384953	0.00429658	0.00358346	0.00522184	0.00342011	0.00180173	Up	0.002264	NC	No	No	No	No
Sos1	0.0235092	0.0248413	0.0187415	0.0193279	0.0284648	0.0257934	0.0212617	0.0240186	0.0180736	0.0162074	0.028064	0.022178	0.0234464	0.0216339	0.00181249	Up	0.023155	NC	No	No	No	No
Ncam2	0.016428	0.0217386	0.0162714	0.0119878	0.00727053	0.00907497	0.015399	0.0175959	0.013908	0.00979256	0.00809592	0.00701827	0.0137952	0.0119683	0.00182695	Up	0.041646	NC	No	No	No	No
Rps6kl1	0.009188	0.0113874	0.00943789	0.0105954	0.010619	0.0102515	0.00944767	0.00899643	0.0085009	0.00651546	0.00964838	0.00735235	0.0102465	0.0084102	0.00183634	Up	0.035671	NC	Yes	No	Yes	No
Cox5a	0.0149399	0.0123364	0.0126931	0.0188481	0.0085075	0.00963879	0.0128463	0.0113866	0.0095399	0.0154333	0.00696408	0.00976245	0.0128273	0.0109888	0.0018385	Up	0.020192	NC	No	No	Yes	No
1810022K09Rik	0.0102737	0.0197182	0.0114064	0.0132649	0.0114532	0.0134843	0.00946221	0.016541	0.00846222	0.0103381	0.0104297	0.0133292	0.0132668	0.0114271	0.00183972	Up	0.019124	Down	No	No	No	No
Nop14	0.00806241	0.011872	0.0124612	0.00913925	0.008138	0.00786811	0.0060632	0.0070827	0.0102625	0.00747432	0.00753562	0.00808089	0.00959017	0.00774987	0.00184029	Up	0.046253	NC	No	No	No	No
Ttc9	0.013241	0.0147831	0.0184609	0.0118835	0.0114493	0.014781	0.0113102	0.0146856	0.0163464	0.00969429	0.00851187	0.0129972	0.0140998	0.0122576	0.00184224	Up	0.004957	NC	No	No	No	No
Tsen2	0.01267	0.0127733	0.0158508	0.0156708	0.0164605	0.0156425	0.0104347	0.0128384	0.0135337	0.0118363	0.0154188	0.0139449	0.0148447	0.0130011	0.00184353	Up	0.018576	NC	No	No	No	No
Fam160b1	0.0330825	0.0303389	0.0315801	0.0266971	0.035491	0.0401927	0.0295136	0.0298129	0.0318981	0.0228657	0.0339729	0.0382541	0.0328971	0.0310529	0.00184418	Up	0.040111	NC	No	Yes	No	No
Asb6	0.010011	0.0116694	0.0140125	0.00977079	0.0092989	0.0104315	0.0093852	0.00927998	0.0136956	0.00611201	0.00684939	0.00874108	0.0108657	0.00901055	0.00185514	Up	0.014912	NC	No	No	No	No
Chd1l	0.0113018	0.0113025	0.0116702	0.0140417	0.014776	0.0143788	0.0101362	0.00837876	0.00718083	0.0116108	0.0152335	0.0137514	0.0129119	0.0110486	0.00186326	Up	0.049897	NC	No	No	No	No
Gas2	0.0256463	0.0181613	0.0279508	0.0226444	0.0314965	0.0288995	0.025203	0.0171153	0.0248851	0.022433	0.0292871	0.0246946	0.0257998	0.0239363	0.00186347	Up	0.034158	NC	No	No	No	No
Aox1	0.00568553	0.00706106	0.00809046	0.00536526	0.00886069	0.0102658	0.00240153	0.00442451	0.00647238	0.00466568	0.00709039	0.00907083	0.0075548	0.00568755	0.00186724	Up	0.004763	NC	No	No	No	No
Fosl1	0.00605939	0.00893227	0.00853341	0.00742809	0.00898992	0.0112636	0.0052898	0.00662004	0.00777911	0.00362284	0.00768502	0.00888912	0.00853444	0.00664766	0.00188679	Up	0.011247	NC	No	No	No	No
Gdpd1	0.0172245	0.0171744	0.0160867	0.0167413	0.0196399	0.019816	0.013887	0.0176242	0.0141538	0.0126949	0.0178294	0.019123	0.0177805	0.0158854	0.00189509	Up	0.037616	Up	No	No	No	No
Fancm	0.00981226	0.0121078	0.0106809	0.00851179	0.0135273	0.0136553	0.00874809	0.0093029	0.0104526	0.00669602	0.0109597	0.010754	0.0113825	0.00948555	0.00189699	Up	0.007527	NC	No	No	No	No
Dact1	0.011041	0.0145072	0.0144318	0.0133486	0.0120247	0.00830891	0.00808146	0.013631	0.0119651	0.0132141	0.0108358	0.00447001	0.012277	0.0103662	0.0019108	Up	0.020754	NC	No	No	Yes	No
Rpa2	0.0125796	0.0114275	0.013069	0.0119556	0.0104348	0.0131466	0.0102425	0.0123549	0.0121444	0.00938061	0.00825748	0.00876588	0.0121022	0.010191	0.00191122	Up	0.04641	NC	No	No	No	No
Zfp592	0.0203839	0.0194586	0.0238101	0.0235619	0.0217377	0.0185805	0.0200598	0.01487	0.0229961	0.0227737	0.0180845	0.0171909	0.0212554	0.0193292	0.00192625	Up	0.043656	NC	No	No	No	No
Smarca1	0.0115263	0.00994352	0.00830124	0.00744452	0.00801128	0.00593918	0.010107	0.00789861	0.00506722	0.00544402	0.00763808	0.00341426	0.00852767	0.00659487	0.0019328	Up	0.00466	NC	No	Yes	No	No
Lrif1	0.0148524	0.0152859	0.0128852	0.0154168	0.0145139	0.0142702	0.0133058	0.0119465	0.0103544	0.0128158	0.0134275	0.013736	0.0145374	0.0125977	0.00193974	Up	0.006469	NC	No	No	No	No
C77370	0.00702277	0.00990007	0.0109827	0.00317024	0.00337812	0.0106225	0.00530625	0.00659349	0.006383	0.00387262	0.0023764	0.00884547	0.00751273	0.00556287	0.00194986	Up	0.048281	NC	No	Yes	No	No
Igtp	0.00803505	0.0110706	0.00752297	0.00842866	0.00634702	0.0127188	0.00710246	0.00792373	0.00425051	0.00628704	0.00751714	0.00934265	0.00902052	0.00707059	0.00194993	Up	0.044427	NC	No	No	No	No
Rft1	0.00830793	0.0104333	0.00936465	0.0083617	0.00758227	0.00783113	0.00849191	0.00605567	0.00538339	0.00692113	0.00644447	0.00688049	0.00864682	0.00669618	0.00195065	Up	0.046459	NC	No	No	No	No
Vipas39	0.0258511	0.0217279	0.0259862	0.0273636	0.0232852	0.0247869	0.0240808	0.0191029	0.0249514	0.0255375	0.022516	0.0210966	0.0248335	0.0228809	0.00195262	Up	0.00667	NC	No	No	No	No
Zfp775	0.00634407	0.00507822	0.0069063	0.00581313	0.00729896	0.00796353	0.00446592	0.00520781	0.00332576	0.0041172	0.00658015	0.00398102	0.00656737	0.00461298	0.00195439	Up	0.029977	NC	No	No	No	No
Stox1	0.0205525	0.0249753	0.022467	0.0176557	0.0171136	0.0212071	0.0184817	0.021255	0.0209703	0.0145197	0.0166124	0.0203664	0.0206619	0.0187009	0.00196096	Up	0.012924	NC	No	Yes	No	No
Amph	0.0403072	0.0328806	0.0289299	0.0354403	0.0442717	0.0458241	0.0375955	0.0315172	0.0287774	0.033184	0.0430887	0.0417252	0.0379423	0.0359813	0.00196097	Up	0.0174	NC	No	No	Yes	No
Thap4	0.0134731	0.0121137	0.0133191	0.012641	0.0112873	0.0148767	0.0113477	0.0113919	0.0100716	0.0109475	0.0100046	0.0121794	0.0129518	0.0109905	0.00196136	Up	0.003508	NC	No	No	No	No
Gtf2e1	0.0108557	0.00809555	0.0118207	0.0125135	0.0106328	0.0117668	0.00891328	0.00499134	0.0104968	0.0113138	0.0106148	0.0075783	0.0109475	0.00898471	0.00196279	Up	0.023034	NC	No	No	No	No
Spaca6	0.0169531	0.015331	0.0157184	0.0204845	0.013141	0.0173427	0.0167445	0.0116677	0.013813	0.0205036	0.0100129	0.0144511	0.0164951	0.0145321	0.00196296	Up	0.027226	NC	No	No	No	No
Dopey1	0.0169008	0.0210662	0.0182322	0.0194102	0.0219367	0.0153861	0.0169339	0.017043	0.0172185	0.0164855	0.0185319	0.0149253	0.018822	0.0168563	0.0019657	Up	0.036328	NC	No	Yes	No	No
March4	0.0347562	0.0329931	0.0332808	0.0321177	0.0422045	0.0453563	0.0358685	0.0310062	0.0304023	0.029554	0.0381983	0.0438427	0.0367848	0.034812	0.00197276	Up	0.038618	NC	No	Yes	No	No
Pitpnm1	0.0174277	0.0143555	0.0193425	0.0151236	0.016552	0.0150443	0.0131665	0.0136208	0.0166434	0.0148041	0.0144236	0.0132812	0.0163076	0.0143233	0.00198434	Up	0.018831	NC	No	No	No	No
Sgsh	0.00482243	0.00719317	0.00713029	0.00671195	0.00787703	0.00898647	0.0041718	0.00691071	0.00333383	0.00507541	0.00412429	0.00719255	0.00712022	0.00513477	0.00198546	Up	0.022889	NC	No	No	No	No
Tcea2	0.0043204	0.00407104	0.00613855	0.00518917	0.00389155	0.00535653	0.00305519	0.00206756	0.00354948	0.0026974	0.0028658	0.00281873	0.00482787	0.00284236	0.00198551	Up	0.000876	NC	No	No	No	No
Asah2	0.00705916	0.00747496	0.00740645	0.00606235	0.00848509	0.007399	0.00381814	0.00505599	0.00660739	0.00190371	0.00747893	0.007058	0.0073145	0.00532036	0.00199414	Up	0.023652	NC	Yes	Yes	No	No
Arhgap8	0.0098367	0.0103014	0.0162105	0.0129025	0.0041709	0.00682301	0.00802029	0.00855439	0.0120118	0.0107926	0.00182618	0.0069776	0.0100408	0.00803048	0.00201037	Up	0.016654	Down	No	Yes	No	No
Pnck	0.00461034	0.00721481	0.00511871	0.00545911	0.00700583	0.00553356	0.00317972	0.0019594	0.00345469	0.00385692	0.0053028	0.00511363	0.00582373	0.00381119	0.00201253	Up	0.031183	Up	No	No	No	No
Aste1	0.00697415	0.00742896	0.00649264	0.00594262	0.00418086	0.00471434	0.00442379	0.00371608	0.00383541	0.003007	0.0048498	0.00375324	0.0059556	0.00393089	0.00202471	Up	0.026655	NC	No	No	No	No
Slc41a2	0.0105801	0.00952521	0.00782984	0.0106037	0.0088596	0.00855432	0.00805668	0.00914138	0.00850762	0.00650689	0.00573892	0.00577027	0.00932546	0.00728696	0.0020385	Up	0.03964	NC	Yes	No	No	No
Sap30bp	0.0112175	0.0153791	0.015203	0.0122698	0.0126609	0.0136115	0.0122652	0.0112715	0.0123463	0.00980491	0.0107861	0.0116264	0.0133903	0.0113501	0.00204023	Up	0.03317	NC	No	No	No	No
Cdc40	0.0230648	0.0262513	0.0211451	0.0175994	0.0235297	0.020342	0.0213653	0.0226814	0.0194473	0.0162826	0.0225748	0.0173357	0.0219887	0.0199479	0.00204084	Up	0.004482	NC	No	No	No	No
Rab5b	0.0495712	0.0412466	0.0445842	0.0524892	0.0441387	0.0448362	0.0479029	0.0366257	0.042911	0.0502893	0.0428659	0.0438853	0.0461443	0.04408	0.00206433	Up	0.01229	NC	No	No	No	No
Rnf32	0.013863	0.0103892	0.0106838	0.0142484	0.0118465	0.0111757	0.0112036	0.00812463	0.00672446	0.0125687	0.00937799	0.0117801	0.0120344	0.00996326	0.00207119	Up	0.020172	NC	Yes	Yes	Yes	No
Wbscr16	0.0144041	0.0141195	0.0207486	0.0157348	0.0186126	0.0196827	0.0145427	0.0132898	0.0165116	0.0145187	0.0168696	0.0151026	0.0172171	0.0151392	0.0020779	Up	0.044685	NC	No	No	No	No
Mterf3	0.0162523	0.0170867	0.0127387	0.0210175	0.0149207	0.0155718	0.0152418	0.0119846	0.0114903	0.0174266	0.0130585	0.0159166	0.0162646	0.0141864	0.00207822	Up	0.048301	NC	No	No	No	No
Slc22a4	0.00524337	0.00567178	0.00559688	0.00781258	0.00552129	0.00440784	0.0052621	0.00224279	0.00369854	0.00401874	0.00379713	0.0027411	0.00570895	0.00362673	0.00208222	Up	0.01398	NC	No	No	No	No
Akap1	0.0109696	0.0105727	0.0125006	0.00991869	0.0125599	0.0116433	0.00919105	0.00601609	0.00862719	0.0107907	0.0107739	0.010185	0.0113608	0.00926398	0.00209681	Up	0.044829	NC	Yes	No	No	No
Atp13a3	0.0112621	0.0127309	0.0128192	0.00996317	0.00933077	0.00989841	0.00962144	0.00872881	0.00983184	0.00651082	0.0105151	0.00815437	0.0110008	0.00889373	0.00210704	Up	0.039352	NC	Yes	No	No	No
Grem2	0.00297564	0.00468372	0.00460605	0.00466378	0.00560227	0.0110573	0.000773617	0.00208869	0.00150166	0.00249969	0.00584538	0.0082207	0.00559813	0.00348829	0.00210984	Up	0.007884	NC	No	Yes	No	No
A130010J15Rik	0.0107382	0.0141038	0.0150655	0.011179	0.0131505	0.0109185	0.00693645	0.0109841	0.0125481	0.00923851	0.0117739	0.0109443	0.0125259	0.0104042	0.00212167	Up	0.012178	NC	No	No	No	No
9030612E09Rik	0.00692851	0.0079653	0.00818967	0.00574684	0.00665091	0.0071821	0.00448933	0.00430142	0.00580267	0.00451223	0.00529195	0.00553197	0.00711056	0.00498826	0.00212229	Up	0.002296	NC	No	No	No	No
Spsb2	0.00857353	0.0130034	0.0120604	0.0104558	0.00835704	0.00950964	0.00836131	0.00998838	0.0087512	0.0076039	0.00722324	0.00728101	0.0103266	0.0082015	0.00212513	Up	0.007806	NC	No	No	No	No
Bod1l	0.00659147	0.0077153	0.00427922	0.00606191	0.00746034	0.00660971	0.00589651	0.00403715	0.0018244	0.00428101	0.00687387	0.00305044	0.00645299	0.00432723	0.00212576	Up	0.011923	Down	No	Yes	No	No
Tsta3	0.0203435	0.0164077	0.0195393	0.0172337	0.0198092	0.0214991	0.0167652	0.015169	0.0188299	0.0171504	0.0180615	0.0161002	0.0191388	0.0170127	0.00212606	Up	0.047758	Down	No	No	No	No
Msh2	0.0177379	0.0151395	0.0157612	0.0184082	0.0171326	0.0153409	0.0167507	0.0126553	0.0128867	0.0150097	0.0153186	0.0140867	0.0165867	0.0144513	0.00213542	Up	0.002635	NC	No	Yes	No	Yes
2310009A05Rik	0.0217937	0.0180172	0.0201126	0.0208803	0.0177709	0.0211739	0.0182121	0.0150593	0.0195706	0.0161139	0.0184209	0.0195396	0.0199581	0.0178194	0.00213871	Up	0.048024	NC	No	No	No	No
Ddx56	0.0141679	0.016987	0.0178445	0.0182252	0.020064	0.0144942	0.0154133	0.01276	0.0151527	0.0153007	0.0172614	0.0130326	0.0169638	0.0148201	0.00214371	Up	0.038171	NC	No	No	No	No
Usp39	0.0119741	0.01028	0.0152996	0.0143881	0.0142547	0.0139971	0.0120001	0.00823084	0.0100005	0.012229	0.0122544	0.012614	0.0133656	0.0112215	0.00214416	Up	0.029933	NC	No	No	No	No
Trappc6a	0.0235844	0.0182446	0.020207	0.0233146	0.0145231	0.0191532	0.0195544	0.0157743	0.0172987	0.0209509	0.0140245	0.0184725	0.0198378	0.0176792	0.00215858	Up	0.011284	NC	No	No	No	No
Gab1	0.0114368	0.00855532	0.0108087	0.00472242	0.0053739	0.00548266	0.00859968	0.00631656	0.00593025	0.00480917	0.00505645	0.00271356	0.00772998	0.00557095	0.00215903	Up	0.033937	NC	No	No	Yes	No
Cct8	0.104501	0.0943619	0.102708	0.106841	0.107238	0.0923632	0.102552	0.0910722	0.101614	0.103219	0.103682	0.0928987	0.101336	0.0991729	0.00216276	Up	0.024347	NC	No	No	No	No
Vwa3b	0.00865123	0.00824985	0.00723312	0.00521914	0.00731261	0.00874379	0.00560552	0.00418582	0.00532492	0.00654236	0.00499436	0.00577234	0.00756829	0.00540422	0.00216407	Up	0.035786	NC	No	Yes	No	No
Oit1	0.00723278	0.00630555	0.00603796	0.0102549	0.0056401	0.00612384	0.00596201	0.00587234	0.00458161	0.00444318	0.00369307	0.00404519	0.00693253	0.00476623	0.0021663	Up	0.036924	NC	No	No	No	No
Gsdma	0.0108978	0.0128895	0.0121746	0.0100643	0.00707012	0.00668907	0.00897615	0.0090973	0.00780802	0.00966062	0.00650217	0.00473079	0.00996422	0.00779584	0.00216838	Up	0.022391	NC	No	No	No	No
Rbm45	0.0138295	0.0128958	0.0150159	0.00998003	0.0179577	0.0138935	0.013045	0.00971579	0.0108774	0.00696645	0.0168627	0.0130733	0.0139287	0.0117568	0.00217198	Up	0.014434	NC	No	No	No	No
Ccnc	0.0219937	0.0281166	0.0238798	0.0214071	0.0227976	0.0198166	0.0199444	0.0264369	0.0238598	0.017416	0.0187259	0.0185887	0.0230019	0.0208286	0.00217327	Up	0.020534	NC	No	No	No	No
Scn3b	0.00585322	0.00917323	0.0066674	0.00609345	0.00422745	0.00416751	0.00489025	0.00452626	0.0036538	0.00445374	0.00248469	0.00313107	0.00603038	0.00385663	0.00217374	Up	0.013227	NC	Yes	Yes	No	No
Ckap4	0.020717	0.0277666	0.0369576	0.0235971	0.0245038	0.0225534	0.0179169	0.0285053	0.0324802	0.0194021	0.0231193	0.0216081	0.0260159	0.0238387	0.00217726	Up	0.045933	NC	No	No	No	No
Stk26	0.0146491	0.014234	0.0170896	0.0114532	0.0145848	0.0123302	0.0124873	0.0126866	0.0127986	0.0088851	0.0119181	0.0124408	0.0140568	0.0118694	0.00218737	Up	0.014022	NC	Yes	No	No	Yes
Cerk	0.0747807	0.0657619	0.076056	0.0712362	0.0841857	0.0821372	0.0700367	0.066045	0.0725563	0.0683448	0.0816803	0.0823199	0.075693	0.0734972	0.00219579	Up	0.045352	NC	No	No	No	No
Clpb	0.0146945	0.0148614	0.0180295	0.0144956	0.0138896	0.0136665	0.0130342	0.0144129	0.0135982	0.0121747	0.0118182	0.0114151	0.0149395	0.0127422	0.00219731	Up	0.008824	NC	Yes	No	No	No
Prpf39	0.0214671	0.0231877	0.0215423	0.0223568	0.0235766	0.024731	0.0187042	0.0188461	0.0203709	0.0192697	0.0244404	0.0220334	0.0228103	0.0206108	0.00219949	Up	0.030913	NC	No	No	No	No
Fam229b	0.0121408	0.0125513	0.0120453	0.0105203	0.01007	0.0129764	0.00936917	0.0113042	0.00865356	0.00903139	0.00964072	0.00908553	0.0117173	0.0095141	0.00220325	Up	0.010441	Up	No	No	No	No
Fam58b	0.0141795	0.0151734	0.0154203	0.0146452	0.0146628	0.0148479	0.0099515	0.0119339	0.0143838	0.0132679	0.0119583	0.0141721	0.0148215	0.0126113	0.00221027	Up	0.0118	NC	No	No	Yes	No
D3Ertd751e	0.0184838	0.023594	0.0175329	0.0212388	0.0275506	0.0271073	0.0166243	0.0233699	0.0142231	0.0202612	0.0245663	0.0232003	0.0225846	0.0203742	0.00221039	Up	0.012924	NC	No	Yes	No	Yes
Klhl42	0.0214327	0.0197989	0.0101213	0.023326	0.011744	0.0178937	0.0175569	0.0161105	0.00853848	0.0208352	0.0121292	0.0158572	0.0173861	0.0151713	0.00221486	Up	0.017773	NC	No	No	No	No
Pus7	0.0148981	0.013706	0.0174635	0.0186035	0.0177078	0.0174782	0.0133323	0.0116939	0.0162639	0.0138213	0.015258	0.0161927	0.0166428	0.014427	0.0022158	Up	0.009881	NC	No	No	No	No
Nkap	0.0243001	0.0268689	0.0269991	0.0206566	0.0244727	0.027034	0.0215384	0.0259278	0.022049	0.0207137	0.0237267	0.0230345	0.0250552	0.0228317	0.00222355	Up	0.041295	NC	No	No	No	No
Plxnb1	0.0171259	0.0170872	0.023363	0.0200331	0.0193073	0.0209517	0.0158266	0.0135408	0.0224546	0.0158988	0.018385	0.0184115	0.0196447	0.0174196	0.00222513	Up	0.011442	NC	No	No	No	No
Taf12	0.018768	0.0156744	0.0178552	0.0201149	0.0204251	0.0213525	0.0172024	0.0141718	0.0147308	0.0205038	0.0156671	0.0185033	0.0190317	0.0167965	0.00223516	Up	0.026275	NC	No	No	No	No
Asphd1	0.0226717	0.0203894	0.021766	0.0177175	0.0220536	0.0189202	0.0207356	0.0178814	0.0229159	0.0148689	0.0176778	0.0160219	0.0205864	0.0183503	0.00223615	Up	0.031212	NC	No	No	No	No
Epb41l4aos	0.0121072	0.0102393	0.0109449	0.0141557	0.0125002	0.0127356	0.0114684	0.00713023	0.00715847	0.0134153	0.00916038	0.0109326	0.0121138	0.00987755	0.00223626	Up	0.010282	NC	No	No	No	No
1810043G02Rik	0.0150995	0.0145797	0.017441	0.0150423	0.0128423	0.0164885	0.0126492	0.0117007	0.0151218	0.0133603	0.0122855	0.0128765	0.0152489	0.012999	0.00224989	Up	0.003298	NC	No	No	No	No
0610037L13Rik	0.0221569	0.0193959	0.02649	0.0236486	0.0242395	0.0237415	0.0183554	0.0191805	0.023791	0.0203606	0.0234661	0.020964	0.0232787	0.0210196	0.00225914	Up	0.011908	NC	No	No	No	No
Asb8	0.0248037	0.0296601	0.028098	0.0278638	0.0272771	0.0268832	0.0250959	0.0242109	0.0278697	0.0255822	0.0245132	0.0236239	0.027431	0.0251493	0.00228167	Up	0.044845	NC	No	No	No	No
Npat	0.0104016	0.0106355	0.0108201	0.0107228	0.0130895	0.0117909	0.00871975	0.00940699	0.00847682	0.00693891	0.0114232	0.00875552	0.0112434	0.00895353	0.00228984	Up	0.002149	NC	No	No	No	No
Gm12592	0.0099595	0.0109128	0.00915488	0.00912885	0.00935361	0.00942334	0.00860315	0.00562996	0.00513095	0.00661449	0.00832579	0.00987502	0.0096555	0.00736323	0.00229228	Up	0.043982	NC	No	No	No	No
Map3k4	0.0250984	0.0219924	0.0251209	0.0234068	0.0280605	0.0284069	0.0255814	0.0202579	0.0248059	0.0194414	0.0238497	0.02437	0.0253477	0.0230511	0.00229659	Up	0.041971	NC	No	No	Yes	No
Adnp2	0.00976504	0.0109697	0.010997	0.00986272	0.0089163	0.00814892	0.00814511	0.0092058	0.00766895	0.00667599	0.00687509	0.0063048	0.00977661	0.00747929	0.00229733	Up	0.000696	Down	Yes	Yes	No	Yes
Snhg12	0.0135476	0.0128244	0.0140129	0.0134121	0.0273938	0.0263066	0.0119071	0.00762932	0.0102446	0.011895	0.0267608	0.0252683	0.0179163	0.0156175	0.00229872	Up	0.025308	NC	No	No	No	No
1110020A21Rik	0.010113	0.0144758	0.0139583	0.0117155	0.0139287	0.0174685	0.00843087	0.0122167	0.0112627	0.00767473	0.0146283	0.0136419	0.01361	0.0113092	0.00230075	Up	0.022312	NC	No	No	No	No
Rpp25l	0.025191	0.0257973	0.0276372	0.0217607	0.0298204	0.0235354	0.0236442	0.0198955	0.0244585	0.022042	0.0270088	0.0228653	0.0256237	0.023319	0.00230463	Up	0.049292	Down	No	Yes	No	No
Snx11	0.0136644	0.0131403	0.0146049	0.0169822	0.0161354	0.0176595	0.010617	0.0135642	0.0114702	0.0156696	0.0145371	0.0124858	0.0153645	0.0130573	0.00230712	Up	0.032053	NC	No	Yes	No	Yes
Zcchc16	0.00913091	0.0112431	0.00480633	0.00806	0.00590963	0.00637454	0.0060946	0.00671833	0.00538891	0.00502673	0.0051403	0.0032669	0.00758742	0.00527263	0.0023148	Up	0.028576	NC	No	No	No	No
Rnps1	0.00975437	0.00860962	0.00877763	0.0121625	0.0072151	0.00961134	0.0104082	0.00491072	0.00576027	0.0115155	0.0041738	0.00547262	0.0093551	0.00704018	0.00231492	Up	0.030087	NC	No	No	No	No
Ttc13	0.0173679	0.0212994	0.0201712	0.0211858	0.018292	0.0179115	0.0175109	0.0168835	0.0155212	0.0193927	0.0157599	0.0172487	0.0193713	0.0170528	0.00231846	Up	0.033156	NC	No	No	No	Yes
Csgalnact2	0.0111329	0.0109964	0.0102504	0.0123239	0.0131296	0.0118099	0.00835491	0.00902058	0.00787238	0.0101842	0.0101149	0.0101404	0.0116072	0.00928123	0.00232596	Up	9.5e-05	NC	No	No	No	No
Mcu	0.011281	0.00795378	0.00485003	0.00502178	0.0106233	0.00839494	0.00870764	0.00418703	0.00370712	0.00421303	0.00773296	0.00558705	0.0080208	0.00568914	0.00233167	Up	0.003924	NC	No	No	No	No
Zfp507	0.0152644	0.00980365	0.0168605	0.0163914	0.0137743	0.010769	0.0128706	0.00745921	0.012151	0.0119534	0.0127325	0.011701	0.0138105	0.0114779	0.0023326	Up	0.042844	NC	Yes	Yes	Yes	No
Heatr6	0.0247774	0.0213966	0.023311	0.0227831	0.0233585	0.0217589	0.0237653	0.0184765	0.0226221	0.0178304	0.0225882	0.0180807	0.0228976	0.0205605	0.00233705	Up	0.023749	NC	Yes	No	No	No
Cyp7b1	0.0103675	0.011582	0.00892292	0.00859128	0.00860891	0.0084819	0.0076448	0.00867853	0.00663712	0.00537739	0.00656943	0.00753575	0.00942575	0.00707384	0.00235191	Up	0.000841	NC	No	Yes	No	No
Scrib	0.0185568	0.0184576	0.0202992	0.0179108	0.0208491	0.0192117	0.0175577	0.0159799	0.0175627	0.0150953	0.0198503	0.0151145	0.0192142	0.0168601	0.00235412	Up	0.004697	NC	No	No	No	No
Syce2	0.0142688	0.0147594	0.0157576	0.0219062	0.0159719	0.0183939	0.0141086	0.0119853	0.0150189	0.0155748	0.0130068	0.0172032	0.016843	0.0144829	0.00236005	Up	0.049551	NC	No	No	No	No
Zxdb	0.015764	0.018305	0.0179588	0.0239857	0.0207458	0.0172635	0.0157377	0.0163407	0.0173464	0.017784	0.0176879	0.0149555	0.0190038	0.016642	0.00236179	Up	0.04565	NC	No	Yes	No	Yes
Bop1	0.00999935	0.0113955	0.0165786	0.0143958	0.0122279	0.0087468	0.00782899	0.0105499	0.0105045	0.0125376	0.00963909	0.00808052	0.012224	0.00985678	0.00236721	Up	0.031843	NC	Yes	No	No	No
Tpr	0.0281495	0.0311828	0.0331789	0.0264244	0.0345842	0.0305741	0.0267701	0.0273384	0.0308537	0.0257817	0.0317964	0.0272971	0.0306823	0.0283062	0.00237608	Up	0.004591	NC	No	No	No	No
Bcl6b	0.00875757	0.0058403	0.00748284	0.00770952	0.0101513	0.00672526	0.00515808	0.00750698	0.00410007	0.00554656	0.00556761	0.00444659	0.00777779	0.00538765	0.00239014	Up	0.043596	NC	No	No	No	No
Ilkap	0.044323	0.0432291	0.0480768	0.0460436	0.0496596	0.0499173	0.0447864	0.0411582	0.045315	0.0418732	0.0488087	0.0449639	0.0468749	0.0444842	0.00239065	Up	0.034068	NC	No	No	No	No
Pabpc1l	0.00695387	0.00949029	0.00735073	0.00906948	0.0059892	0.00775413	0.00425989	0.00698427	0.00531603	0.0036244	0.00440505	0.00766086	0.00776795	0.00537508	0.00239286	Up	0.02078	NC	No	No	No	No
Ccdc124	0.0197966	0.0199795	0.0220877	0.0179832	0.0114949	0.016453	0.0156135	0.0159205	0.0203589	0.0164934	0.0116501	0.0133647	0.0179658	0.0155668	0.00239895	Up	0.017553	NC	Yes	No	No	No
Atg2b	0.0311726	0.0308509	0.0344538	0.034648	0.0395303	0.0321629	0.0281613	0.0277823	0.0301248	0.0315058	0.0388771	0.0319645	0.0338031	0.0314026	0.00240047	Up	0.014789	NC	No	No	No	No
Nsdhl	0.012583	0.0140574	0.0132716	0.0141955	0.0130517	0.0152357	0.0114791	0.00845958	0.0109888	0.0131954	0.0115817	0.012253	0.0137325	0.0113263	0.0024062	Up	0.019366	NC	No	Yes	No	No
Slc22a15	0.0116878	0.0102527	0.0128645	0.0112534	0.0141822	0.0115119	0.0108769	0.00605143	0.0114359	0.0105484	0.0089704	0.0094096	0.0119587	0.00954877	0.00240997	Up	0.025432	NC	No	Yes	Yes	No
Mfn1	0.022884	0.0200014	0.0218039	0.0200795	0.0252318	0.0268748	0.0180875	0.0175431	0.0193827	0.0167839	0.0263699	0.0242456	0.0228125	0.0204021	0.00241041	Up	0.029434	NC	No	No	No	No
Pou6f1	0.0226521	0.0204345	0.0193298	0.0207555	0.0221099	0.0229357	0.0196849	0.0205452	0.018841	0.0177955	0.0179766	0.0188803	0.0213696	0.0189539	0.00241565	Up	0.022093	NC	No	No	No	No
Scai	0.030491	0.0252145	0.0219178	0.0282646	0.0316187	0.0236593	0.0269987	0.0228137	0.023439	0.0254359	0.027027	0.0209197	0.026861	0.024439	0.00242197	Up	0.035836	NC	No	No	No	No
Asb3	0.0220686	0.0171332	0.0167688	0.0210721	0.0196874	0.0187655	0.0209257	0.0142435	0.0134795	0.0170488	0.0180137	0.0172517	0.0192493	0.0168271	0.00242212	Up	0.003526	NC	No	No	No	No
Dync1i1	0.0119502	0.0149929	0.0150918	0.0118009	0.0105441	0.00973948	0.00987118	0.0101242	0.0110097	0.00873117	0.0106605	0.00916632	0.0123532	0.00992717	0.00242604	Up	0.028857	NC	Yes	Yes	Yes	No
Mlxip	0.0416534	0.0415967	0.0393789	0.0436526	0.0404093	0.0400705	0.0389053	0.0377043	0.0379762	0.0396042	0.0390299	0.0389725	0.0411269	0.0386987	0.00242816	Up	0.006485	NC	Yes	Yes	No	Yes
Sap130	0.0227472	0.0251838	0.0254266	0.0213017	0.0288373	0.0248727	0.0223043	0.0247074	0.023035	0.0169788	0.0248609	0.0218366	0.0247282	0.0222872	0.00244104	Up	0.016209	NC	No	No	No	No
Fez1	0.011034	0.0187337	0.0204607	0.0131191	0.0101699	0.00885899	0.0102458	0.0140617	0.0151166	0.00972052	0.0105927	0.00786865	0.0137294	0.0112677	0.00246172	Up	0.049576	NC	Yes	No	Yes	No
Ccdc60	0.00575727	0.00705756	0.00981919	0.00521588	0.00337837	0.0172792	0.00371851	0.00335752	0.00747922	0.00465953	0.00253797	0.0119449	0.00808458	0.00561628	0.00246831	Up	0.02023	Up	No	Yes	No	No
Ahctf1	0.0186747	0.0172827	0.0168916	0.0220668	0.0194447	0.0189786	0.0181789	0.0168903	0.0128069	0.0179346	0.0166879	0.0159803	0.0188898	0.0164132	0.00247668	Up	0.015008	NC	No	No	Yes	No
Bbs4	0.00967455	0.0109472	0.00877646	0.00760637	0.00942822	0.0098009	0.00524473	0.00654026	0.00666112	0.00854789	0.00771711	0.00665532	0.00937228	0.0068944	0.00247787	Up	0.029918	Up	No	No	No	No
Tmem222	0.0189103	0.0151542	0.0167194	0.0170985	0.0196682	0.0245187	0.0148926	0.0158579	0.0149445	0.0132714	0.0178966	0.0203335	0.0186782	0.0161994	0.00247879	Up	0.024543	NC	No	No	No	No
Gm37240	0.0285788	0.0255952	0.0305047	0.0232978	0.030623	0.0302063	0.0282314	0.0215712	0.0243662	0.0207346	0.0294641	0.0295025	0.0281343	0.025645	0.00248929	Up	0.042043	NC	No	No	No	No
Sphk2	0.0335172	0.028658	0.0291829	0.031806	0.0357217	0.0339784	0.0305739	0.0273688	0.0282049	0.0281701	0.0297046	0.0338653	0.032144	0.0296479	0.00249609	Up	0.036675	NC	No	No	No	No
Slc35g1	0.0130776	0.0151712	0.0164985	0.0111062	0.0165111	0.0117543	0.0126379	0.00936558	0.0131072	0.00986673	0.0131859	0.0109704	0.0140198	0.0115223	0.00249756	Up	0.031066	NC	No	No	No	No
Abcb8	0.0154559	0.0152353	0.0184766	0.0130082	0.0125858	0.0149276	0.0116502	0.0117827	0.0149481	0.0126368	0.0132566	0.0104291	0.0149482	0.0124506	0.00249763	Up	0.033794	NC	No	No	No	Yes
Nectin1	0.0205344	0.01894	0.0231417	0.0204816	0.018742	0.0175478	0.0181316	0.0169573	0.0224205	0.0153693	0.0152027	0.0162888	0.0198979	0.017395	0.00250289	Up	0.012383	NC	Yes	No	Yes	Yes
Acot11	0.0283097	0.0299634	0.0365327	0.0282415	0.0374992	0.0369339	0.0267987	0.0284456	0.0310302	0.0249413	0.0333658	0.0378275	0.0329134	0.0304015	0.00251189	Up	0.042292	NC	Yes	No	No	No
Dguok	0.0366362	0.0270148	0.0329204	0.0333761	0.037216	0.0365868	0.0351885	0.0251134	0.0308383	0.0321551	0.0338755	0.0314876	0.0339584	0.0314431	0.00251532	Up	0.008454	NC	No	No	No	No
Mfsd14b	0.0293048	0.0293837	0.0284658	0.0264233	0.0273158	0.0258271	0.0231432	0.0282768	0.0249011	0.0261334	0.0270815	0.0220757	0.0277868	0.0252686	0.00251817	Up	0.048026	NC	No	No	No	No
Arl6	0.0245649	0.0251442	0.0199692	0.0240998	0.0269926	0.022456	0.0250993	0.0218274	0.0167865	0.021039	0.0211248	0.0222129	0.0238711	0.0213483	0.00252281	Up	0.045152	NC	No	No	No	Yes
Wbp1	0.0326803	0.0354278	0.0420127	0.0380747	0.0330505	0.0351186	0.0269552	0.0315121	0.0427099	0.03525	0.0303587	0.0344063	0.0360608	0.033532	0.00252874	Up	0.041834	NC	No	No	No	No
Dnm3	0.0323714	0.033634	0.0290878	0.0271907	0.0305697	0.037948	0.0298533	0.0315123	0.026592	0.0262073	0.0259511	0.0354577	0.0318003	0.0292623	0.00253798	Up	0.003235	NC	Yes	Yes	No	No
Lyst	0.0245646	0.0207938	0.0208792	0.022362	0.0243106	0.0255542	0.0240896	0.0200946	0.0177833	0.0186618	0.0231637	0.0194364	0.0230774	0.0205382	0.00253919	Up	0.036422	NC	No	No	No	No
Zbtb7c	0.0197831	0.0141899	0.0139409	0.0143211	0.0141376	0.0171097	0.0162047	0.0136023	0.0122429	0.0142781	0.0109889	0.0109206	0.0155804	0.0130396	0.00254082	Up	0.040074	NC	Yes	No	Yes	No
St6galnac6	0.0256992	0.0277764	0.025939	0.0247881	0.025892	0.0278403	0.0238875	0.0257996	0.0194984	0.0217625	0.0262044	0.025499	0.0263225	0.0237752	0.00254728	Up	0.037116	NC	No	No	No	No
Rnf138	0.0243965	0.0229174	0.0259783	0.0268956	0.0287613	0.023631	0.0212007	0.0222688	0.0209645	0.0235266	0.0253661	0.0239603	0.02543	0.0228812	0.00254885	Up	0.025695	NC	No	No	No	No
Klhl1	0.0125966	0.0156939	0.0127007	0.0147648	0.010892	0.00767658	0.00987929	0.0149331	0.0103066	0.00888105	0.00809842	0.00689564	0.0123874	0.00983235	0.00255508	Up	0.020547	Up	No	No	No	No
Supt7l	0.0142307	0.00982466	0.0179103	0.0165052	0.0134518	0.0146345	0.0121215	0.00863521	0.0161147	0.0124033	0.0112999	0.0105293	0.0144262	0.0118507	0.00257553	Up	0.00371	NC	No	No	No	No
Irgm2	0.00855241	0.00582107	0.00440306	0.0121827	0.011242	0.0158701	0.00591179	0.00478433	0.00551489	0.00759648	0.00740732	0.0113756	0.00967855	0.00709841	0.00258014	Up	0.03752	NC	No	No	No	No
Acvr1b	0.0106141	0.0178529	0.0129188	0.0114118	0.0145153	0.0110376	0.0112269	0.0120985	0.00914042	0.00972819	0.0121604	0.00847358	0.0130584	0.0104713	0.00258709	Up	0.03068	NC	No	Yes	No	No
Ilf3	0.0316363	0.0317211	0.037695	0.0350186	0.0388875	0.0366679	0.0302926	0.0288685	0.0311183	0.0348624	0.0370055	0.0339306	0.035271	0.0326797	0.00259137	Up	0.033822	NC	No	No	No	No
Fbxw9	0.0170553	0.0167338	0.0197862	0.0190282	0.0188805	0.0221642	0.0149575	0.015361	0.0173295	0.0151992	0.0152551	0.0199101	0.0189413	0.0163354	0.00260593	Up	0.001078	NC	No	No	No	No
Ung	0.0090487	0.0123838	0.0128485	0.0121037	0.0056128	0.00859169	0.00714093	0.0100667	0.00825531	0.00649316	0.00661753	0.00632204	0.0100982	0.00748262	0.00261558	Up	0.039246	NC	No	No	No	No
Kcnh2	0.0251269	0.0267493	0.0277177	0.027343	0.0230633	0.0294573	0.0198062	0.0236722	0.0229052	0.0248771	0.0246672	0.0278032	0.0265763	0.0239552	0.00262107	Up	0.049801	NC	Yes	No	No	No
Coasy	0.0478664	0.0429343	0.0520422	0.048545	0.0500201	0.0580469	0.0452859	0.0419061	0.0471025	0.0472093	0.0499254	0.0522382	0.0499091	0.0472779	0.00263125	Up	0.037089	NC	No	No	No	No
Adck3	0.0129543	0.0141562	0.0112058	0.00909188	0.00822398	0.0106575	0.00818509	0.00866287	0.0104539	0.00635601	0.00758934	0.00922883	0.0110483	0.00841267	0.00263559	Up	0.026966	NC	No	No	No	No
Gar1	0.0142366	0.0181138	0.0200277	0.0178522	0.0157966	0.0153163	0.015746	0.0159226	0.0155181	0.0126772	0.0126725	0.0129696	0.0168905	0.014251	0.00263951	Up	0.040363	NC	No	No	No	No
Mllt11	0.0217267	0.0185413	0.0215802	0.0180002	0.0206634	0.0178217	0.0162319	0.018567	0.0194189	0.0147858	0.0161076	0.017362	0.0197223	0.0170789	0.00264339	Up	0.032232	NC	No	No	No	No
Rb1cc1	0.0463066	0.0443541	0.0435436	0.0436525	0.0534984	0.0404833	0.0459049	0.0395038	0.0422667	0.0403604	0.0483762	0.0395468	0.0453064	0.0426598	0.00264659	Up	0.025514	NC	No	No	No	No
Pex6	0.0198724	0.0222249	0.0230959	0.0208484	0.0185124	0.0175952	0.0190405	0.0175529	0.0194654	0.0157493	0.0164107	0.0180368	0.0203582	0.0177093	0.00264897	Up	0.031949	NC	No	No	No	No
Gm12474	0.00856773	0.00982607	0.0116492	0.0102797	0.00535524	0.00717401	0.00706114	0.00544337	0.00648322	0.00954495	0.00348578	0.00491755	0.00880865	0.006156	0.00265265	Up	0.013398	NC	No	No	No	No
Atxn7l3	0.0197233	0.0181754	0.0244393	0.0180743	0.0222224	0.0213986	0.0145465	0.0177469	0.0186342	0.0164525	0.0214302	0.0192176	0.0206722	0.0180046	0.00266757	Up	0.035191	NC	No	No	No	No
Snx16	0.0138931	0.00825101	0.0136982	0.0125073	0.0138753	0.0123911	0.00915361	0.00833047	0.00978857	0.0101503	0.0115783	0.00952162	0.012436	0.00975382	0.0026822	Up	0.01057	NC	No	No	No	No
Kdm6a	0.0167182	0.0215971	0.0170819	0.0310439	0.0348901	0.030544	0.0134829	0.0173256	0.0116041	0.0285257	0.0338326	0.0310047	0.0253125	0.0226292	0.0026833	Up	0.028381	NC	No	No	No	No
Slc25a22	0.022006	0.0306659	0.0306359	0.0273569	0.0271576	0.0269317	0.0199216	0.0275083	0.0263799	0.0262478	0.0217998	0.0267492	0.027459	0.0247678	0.00269122	Up	0.019524	NC	No	No	No	Yes
Apmap	0.026198	0.0264468	0.0286063	0.0321245	0.0327222	0.0345439	0.0248463	0.0275335	0.0272542	0.0265502	0.0283047	0.0299855	0.0301069	0.0274124	0.00269456	Up	0.04921	NC	No	No	No	No
Tmem159	0.0204971	0.0217507	0.0251577	0.020974	0.0177175	0.0228926	0.0197271	0.0203285	0.018445	0.0207336	0.0141461	0.0193973	0.0214983	0.0187963	0.002702	Up	0.040184	NC	No	No	Yes	No
Cdc25a	0.0209891	0.0194725	0.0308987	0.0260816	0.0232232	0.0203936	0.0198375	0.0157393	0.0255568	0.0226585	0.0196541	0.0213549	0.0235098	0.0208002	0.00270959	Up	0.031491	NC	No	No	No	No
Gm16386	0.0152337	0.0193932	0.0171911	0.0134847	0.0132968	0.0204624	0.0115812	0.0152787	0.0153255	0.0108778	0.0111471	0.0185219	0.0165103	0.0137887	0.0027216	Up	0.000896	NC	No	No	No	No
Uck1	0.0134852	0.0172243	0.0176089	0.016516	0.0129142	0.0165766	0.012602	0.0116577	0.0131312	0.0135309	0.0130216	0.0140477	0.0157209	0.0129985	0.00272232	Up	0.025912	NC	No	No	No	No
Wbp1l	0.0243573	0.0234371	0.0288725	0.0194705	0.0268656	0.0245483	0.0194647	0.0210424	0.0280172	0.0152952	0.0242725	0.0230608	0.0245919	0.0218588	0.00273308	Up	0.007504	NC	No	No	No	No
Tbck	0.0216814	0.0183173	0.0207828	0.0211058	0.0261488	0.0193937	0.0216802	0.0141855	0.0149288	0.0205989	0.0224401	0.0171331	0.0212383	0.0184944	0.00274388	Up	0.030499	NC	No	No	No	Yes
Tmem59l	0.00998037	0.010769	0.00967492	0.00834142	0.00783537	0.00707467	0.00632786	0.00837219	0.00637119	0.00478596	0.00739808	0.00384589	0.00894596	0.00618353	0.00276244	Up	0.00264	NC	No	No	No	No
Cdr2	0.0572272	0.0437657	0.0455958	0.0533629	0.0494905	0.0449209	0.0515654	0.0435628	0.0415199	0.0487954	0.0476049	0.0447167	0.0490605	0.0462942	0.00276634	Up	0.033698	NC	No	No	No	No
Helz2	0.0141221	0.0171393	0.0166462	0.0162191	0.0170703	0.0198371	0.0137947	0.0136301	0.0134111	0.0110021	0.0150348	0.0175557	0.016839	0.0140714	0.00276758	Up	0.009124	NC	No	No	No	No
Prkdc	0.0279421	0.027569	0.0263292	0.0257929	0.0246097	0.0274746	0.0253286	0.0255998	0.0223976	0.0251736	0.0217801	0.0228097	0.0266196	0.0238482	0.00277135	Up	0.005131	NC	No	No	No	No
Adarb2	0.0138476	0.0260252	0.0134288	0.011939	0.0107932	0.0124459	0.0114189	0.0211819	0.0136367	0.0102286	0.00853133	0.00672107	0.0147466	0.0119531	0.00279354	Up	0.024996	NC	No	No	No	Yes
Gne	0.0199292	0.0252566	0.028554	0.0185862	0.0269543	0.0241682	0.0202913	0.0208513	0.0236381	0.0167784	0.024321	0.0207952	0.0239081	0.0211126	0.00279552	Up	0.01604	NC	No	No	No	No
Bcat2	0.0123979	0.0180455	0.0210382	0.0155252	0.0141216	0.0122692	0.0114056	0.0120178	0.016633	0.0111685	0.0127231	0.0126666	0.0155663	0.0127691	0.00279716	Up	0.039975	NC	No	No	No	No
Sidt2	0.0133213	0.0129782	0.0179524	0.0135455	0.0167534	0.0144798	0.00825144	0.0121541	0.0141643	0.00997116	0.0136386	0.013997	0.0148384	0.0120294	0.00280898	Up	0.012195	NC	No	No	No	No
Chst12	0.0227206	0.0288496	0.0273949	0.0209055	0.0212999	0.0215825	0.0164601	0.0233795	0.0273312	0.0181708	0.0199931	0.0205445	0.0237922	0.0209799	0.00281228	Up	0.041484	NC	No	No	No	No
Vps18	0.0276235	0.0220654	0.0219436	0.0230528	0.0265702	0.0231999	0.0223165	0.0211239	0.0189	0.0214926	0.0211421	0.0225581	0.0240759	0.0212555	0.0028204	Up	0.023258	NC	No	No	No	No
Mest	0.00592117	0.00727072	0.0098936	0.00481273	0.00385852	0.00301487	0.00433911	0.00253907	0.00281456	0.00367776	0.00393526	0.000529556	0.00579527	0.00297255	0.00282272	Up	0.046758	NC	No	No	No	No
Spryd7	0.0245077	0.0219617	0.0193791	0.0285812	0.0299194	0.0255664	0.0205218	0.0173854	0.0200576	0.0246566	0.0281071	0.0221523	0.0249859	0.0221468	0.00283912	Up	0.01653	NC	No	No	No	No
Ing3	0.01794	0.0217622	0.016763	0.0212584	0.0185532	0.0210245	0.0160613	0.015981	0.0153501	0.0187532	0.0171653	0.0169132	0.0195502	0.016704	0.00284621	Up	0.010672	NC	No	No	No	No
Prkci	0.0197961	0.021486	0.0182056	0.0176652	0.0209159	0.0185068	0.0175237	0.0156089	0.0182809	0.0159065	0.0170386	0.0151168	0.0194293	0.0165792	0.00285005	Up	0.018438	NC	No	No	Yes	No
Qars	0.0368885	0.0423949	0.041321	0.0351361	0.035454	0.0366322	0.0307406	0.0395616	0.0379286	0.035248	0.0331703	0.0340607	0.0379711	0.0351183	0.00285284	Up	0.01796	NC	No	No	Yes	No
Cit	0.0104101	0.0129469	0.00885809	0.00931426	0.0131001	0.0119319	0.00632884	0.00538183	0.0083255	0.00810246	0.0106124	0.0106769	0.0110936	0.008238	0.00285556	Up	0.044671	NC	No	No	No	No
A930005H10Rik	0.0223277	0.0151094	0.015438	0.0191146	0.0155621	0.0164503	0.0188431	0.0142372	0.00863713	0.0181654	0.0131866	0.0137788	0.0173337	0.0144747	0.002859	Up	0.02372	NC	No	No	No	No
Rnf126	0.0138455	0.0156509	0.0189698	0.0135361	0.0118479	0.0145953	0.0129519	0.00959575	0.0154459	0.0113058	0.00983591	0.0121441	0.0147409	0.0118799	0.00286104	Up	0.010931	NC	No	No	No	No
Ankrd39	0.00546138	0.00997666	0.00917993	0.0063721	0.00683925	0.00795559	0.00423669	0.00417268	0.00606209	0.00462135	0.00558121	0.00389693	0.00763082	0.00476183	0.00286899	Up	0.011979	NC	No	No	No	No
Wdr5	0.0226752	0.0163824	0.0249091	0.0234975	0.0198387	0.0191401	0.0162527	0.0131713	0.0204528	0.0234832	0.0179728	0.0178929	0.0210739	0.0182043	0.00286958	Up	0.029352	NC	No	No	No	No
Mllt6	0.0287659	0.0262192	0.0297062	0.0271191	0.0347138	0.0320785	0.0233777	0.0212232	0.0267723	0.0271424	0.032666	0.0300951	0.0297671	0.0268795	0.00288765	Up	0.017719	NC	No	No	No	No
Atp5sl	0.0158733	0.0141619	0.0175827	0.0165061	0.0157623	0.0178808	0.0121283	0.0132568	0.0144058	0.012272	0.0147678	0.0135459	0.0162945	0.0133961	0.00289841	Up	0.006185	NC	No	No	No	No
Per2	0.0420544	0.0489852	0.0561964	0.0489667	0.0758061	0.0464093	0.0375191	0.0462773	0.0564018	0.0485139	0.0698807	0.0424217	0.0530697	0.0501691	0.00290063	Up	0.031284	NC	No	No	No	No
Mum1	0.0177554	0.0163288	0.0216852	0.0178209	0.0214088	0.0197003	0.0162791	0.0130316	0.0140953	0.0152964	0.0217736	0.0168086	0.0191166	0.0162141	0.00290247	Up	0.043417	NC	Yes	No	No	No
Tubb4b	0.0394753	0.0457025	0.0526001	0.0496487	0.0196699	0.0205587	0.0368624	0.0405887	0.0501522	0.0465156	0.0203721	0.0156994	0.0379425	0.0350317	0.0029108	Up	0.019359	NC	No	No	No	No
Ddx41	0.0438831	0.0464463	0.0520257	0.0480725	0.0415221	0.0481265	0.0414643	0.0450668	0.0473405	0.0452704	0.0399614	0.0435046	0.0466794	0.043768	0.00291136	Up	0.00439	NC	No	No	No	No
Ipmk	0.0475773	0.0498407	0.0456638	0.0467665	0.0588122	0.0503689	0.0444101	0.043692	0.041581	0.047018	0.0569103	0.0479128	0.0498382	0.0469207	0.00291754	Up	0.020971	NC	No	Yes	No	Yes
Zfp513	0.0144317	0.0123624	0.0195746	0.0133268	0.0101314	0.0119163	0.0119166	0.00850438	0.0121439	0.0129066	0.00984344	0.00891466	0.0136239	0.0107049	0.00291894	Up	0.041835	NC	No	No	No	No
Cptp	0.00987916	0.00986952	0.0150913	0.0100293	0.0116673	0.0126282	0.00763249	0.00717923	0.00853378	0.00843323	0.00959651	0.010233	0.0115275	0.00860138	0.00292609	Up	0.01088	NC	No	No	No	No
Slc4a3	0.0124172	0.0116337	0.0151746	0.0119641	0.00957622	0.0132081	0.00968989	0.00979358	0.0107894	0.00879924	0.00915457	0.00818735	0.012329	0.00940234	0.00292666	Up	0.007914	NC	Yes	No	No	No
Zfp260	0.0326656	0.0323972	0.030221	0.034996	0.0391828	0.0328921	0.031858	0.0313419	0.0295507	0.0303045	0.0349061	0.026754	0.0337258	0.0307859	0.00293989	Up	0.029244	NC	No	No	No	Yes
Rhobtb2	0.0108021	0.0144916	0.0133881	0.0143584	0.0120932	0.0124252	0.011896	0.0103713	0.0096333	0.00918798	0.0100273	0.00875939	0.0129264	0.00997921	0.00294722	Up	0.022569	NC	No	No	No	No
Fam163a	0.0190895	0.0121824	0.015934	0.0170541	0.0231828	0.0230015	0.0163789	0.00782442	0.0102846	0.0157237	0.0179626	0.0245664	0.0184074	0.0154568	0.00295063	Up	0.045989	NC	Yes	No	No	No
Thada	0.0398193	0.0385625	0.0391808	0.035698	0.0457764	0.044544	0.0373925	0.0389618	0.0317598	0.0333961	0.0425424	0.0417753	0.0405968	0.037638	0.00295886	Up	0.035239	NC	No	No	No	No
Sugp1	0.0323739	0.03548	0.0403694	0.031903	0.0357762	0.0344471	0.0304787	0.0333358	0.0353544	0.0279437	0.0335354	0.0319357	0.0350583	0.0320973	0.00296099	Up	0.0021	NC	No	No	No	No
Asb1	0.0270246	0.0259913	0.0257549	0.0298407	0.032568	0.0224717	0.0257429	0.0212499	0.0244788	0.025788	0.0302095	0.0183921	0.0272752	0.0243102	0.00296501	Up	0.005052	NC	No	Yes	No	No
Gadd45b	0.0312665	0.0263029	0.028424	0.0196823	0.0112282	0.025215	0.0244842	0.0259292	0.0227939	0.0172354	0.0112242	0.0226455	0.0236865	0.0207187	0.00296775	Up	0.045328	NC	Yes	No	No	No
Akr7a5	0.0231953	0.0205558	0.0274326	0.0218567	0.0222714	0.0250721	0.0228276	0.0167617	0.0243996	0.0155413	0.0230188	0.0200076	0.0233973	0.0204261	0.00297124	Up	0.043809	NC	No	No	No	No
Upf2	0.0337191	0.0392459	0.0330571	0.0362054	0.0395235	0.0370093	0.0291726	0.0347728	0.0337111	0.0304893	0.0400184	0.0327373	0.03646	0.0334836	0.00297644	Up	0.047851	NC	No	No	No	No
Erlin2	0.0318094	0.0344278	0.0357847	0.0355274	0.0334376	0.0342665	0.0286119	0.0293392	0.0324926	0.031438	0.0331999	0.0322881	0.0342089	0.0312283	0.00298059	Up	0.007641	NC	Yes	Yes	No	No
3830406C13Rik	0.0228733	0.0264946	0.0232316	0.0202636	0.0238302	0.0296165	0.0204104	0.0222634	0.0208324	0.0190747	0.0210367	0.0248041	0.024385	0.0214036	0.00298137	Up	0.002686	NC	No	Yes	No	No
Gm12258	0.0149262	0.0104241	0.0109449	0.0132527	0.0119558	0.0119317	0.0108256	0.00675054	0.00761354	0.0100085	0.0100974	0.0102286	0.0122392	0.00925404	0.0029852	Up	0.000687	Up	No	No	No	No
Taf4	0.0158482	0.0155911	0.014598	0.0158629	0.0147424	0.0137523	0.0163293	0.0116779	0.0089499	0.0106374	0.0134444	0.0114259	0.0150658	0.0120775	0.00298835	Up	0.027516	NC	Yes	No	No	No
Rbck1	0.0291755	0.0223093	0.0307575	0.0323493	0.0273981	0.0291476	0.0250466	0.021945	0.0286951	0.025067	0.0262357	0.0262135	0.0285229	0.0255338	0.00298909	Up	0.031921	NC	No	No	No	No
Gps1	0.0424328	0.050214	0.0520052	0.0514008	0.0279685	0.0359221	0.0361487	0.047958	0.0499791	0.0485739	0.02934	0.0299509	0.0433239	0.0403251	0.00299879	Up	0.048921	NC	No	No	No	No
Creb3l1	0.0303802	0.0389631	0.045628	0.0310239	0.0369133	0.034099	0.028811	0.0377648	0.0385383	0.0310923	0.0316896	0.03108	0.0361679	0.0331627	0.00300523	Up	0.041327	Up	Yes	Yes	No	No
Calb1	0.0126347	0.0321385	0.0146828	0.0134398	0.00972502	0.00765483	0.010024	0.0272196	0.0113075	0.00883806	0.00812143	0.00662764	0.0150459	0.012023	0.00302292	Up	0.005308	NC	No	No	No	No
Fam131a	0.0207311	0.0183813	0.0185428	0.019131	0.0191567	0.0176634	0.018412	0.0118656	0.0157066	0.0171051	0.0165224	0.0158203	0.0189344	0.0159054	0.00302902	Up	0.008117	NC	No	No	No	No
Nfrkb	0.018544	0.0144385	0.0144278	0.0202565	0.0235493	0.0169315	0.0156627	0.0134484	0.0110828	0.0159409	0.0170893	0.0167205	0.0180246	0.0149908	0.00303383	Up	0.02193	NC	No	No	No	No
Ubtf	0.0309737	0.0311793	0.0334637	0.0342447	0.0281577	0.0309097	0.0249228	0.0293445	0.0283264	0.0289143	0.0281237	0.0310836	0.0314881	0.0284525	0.00303561	Up	0.045737	NC	No	No	No	No
Slc29a4	0.01057	0.0154105	0.0132435	0.0122961	0.0123325	0.0142094	0.0100241	0.00819385	0.00776467	0.0112713	0.00982892	0.0127594	0.0130103	0.00997371	0.00303662	Up	0.040152	NC	No	No	Yes	No
Zfp746	0.0317173	0.0277842	0.0278019	0.0284424	0.0276284	0.0247991	0.0279502	0.0202402	0.0259313	0.0292315	0.0254692	0.0210775	0.0280289	0.0249833	0.00304556	Up	0.042627	NC	Yes	No	No	No
Ncapd3	0.012725	0.0159511	0.0133692	0.0137527	0.0154372	0.0151459	0.011755	0.0101281	0.00970705	0.0103167	0.0142898	0.0118412	0.0143968	0.0113396	0.00305718	Up	0.00885	NC	No	No	No	No
Ttbk2	0.0152151	0.0164479	0.0143919	0.0178394	0.0165297	0.0137704	0.0130972	0.0109552	0.0118308	0.0120256	0.0152338	0.0127027	0.0156991	0.0126409	0.0030582	Up	0.015641	NC	No	No	No	No
Gga3	0.0298477	0.0235528	0.0289823	0.0363704	0.0280818	0.0254374	0.0285388	0.0194927	0.0295038	0.0312999	0.0263962	0.0186711	0.0287121	0.0256504	0.00306163	Up	0.039212	NC	No	No	No	No
Atat1	0.0405124	0.024817	0.0289394	0.0315112	0.0244365	0.0250799	0.033326	0.0244546	0.0275965	0.0296365	0.020066	0.0218403	0.0292161	0.0261533	0.00306274	Up	0.028688	NC	No	No	No	No
Zfp384	0.0192285	0.0262994	0.0233398	0.0294115	0.0176159	0.0193802	0.0173548	0.0197715	0.0223455	0.0249756	0.0168532	0.015591	0.0225459	0.0194819	0.00306396	Up	0.020779	NC	No	No	No	No
Dctn2	0.0699302	0.0669632	0.0769253	0.0700734	0.0694755	0.0736453	0.0634931	0.0624432	0.0774621	0.0693008	0.066366	0.0695373	0.0711688	0.0681004	0.0030684	Up	0.032487	Down	No	No	No	No
Suv420h1	0.016781	0.0264644	0.017672	0.0210432	0.0164701	0.0169461	0.0152458	0.0176897	0.0156214	0.0181246	0.01447	0.0157923	0.0192295	0.0161573	0.0030722	Up	0.046242	NC	No	No	No	No
Mtf2	0.0130093	0.0125894	0.0137041	0.0116179	0.0156308	0.0168103	0.00947834	0.011411	0.0115384	0.00822926	0.0123838	0.0118481	0.0138937	0.0108148	0.00307882	Up	0.002074	NC	No	No	No	No
Rhbdd2	0.0324755	0.0366423	0.0344569	0.0368586	0.0367927	0.0346475	0.0278531	0.0361901	0.0323416	0.0356241	0.0300873	0.0313013	0.0353123	0.0322329	0.00307934	Up	0.02255	Up	No	No	Yes	No
Cilp	0.00477608	0.00550557	0.00737292	0.0044016	0.00627304	0.0144454	0.00186323	0.0052787	0.00442481	0.00241597	0.00265461	0.00761643	0.00712911	0.00404229	0.00308681	Up	0.017829	NC	No	No	No	No
Usp37	0.0227172	0.0222544	0.0283602	0.0204296	0.0249786	0.0285275	0.021015	0.0213807	0.0220176	0.0192749	0.0205608	0.0244825	0.0245446	0.0214553	0.00308931	Up	0.017934	NC	No	No	No	No
Atg10	0.047666	0.045026	0.0475805	0.0470081	0.0486574	0.0443058	0.0446178	0.0403121	0.0398275	0.044794	0.0490671	0.0430567	0.0467073	0.0436126	0.00309473	Up	0.0452	Up	Yes	No	No	No
Morn2	0.0167671	0.0146326	0.0158356	0.0143067	0.0225224	0.0247697	0.0156914	0.0105518	0.0141044	0.00943812	0.0208598	0.0196097	0.018139	0.0150425	0.00309647	Up	0.008556	NC	Yes	No	No	No
Mapk15	0.0341268	0.040358	0.0321336	0.0433086	0.0303575	0.0370604	0.0292113	0.0397327	0.0306984	0.0381283	0.0300093	0.0309859	0.0362242	0.0331277	0.0030965	Up	0.031679	NC	No	Yes	No	No
Med9	0.0216498	0.0247779	0.0213408	0.0209515	0.0215463	0.0194345	0.0159503	0.0187862	0.0218108	0.0174926	0.018066	0.0189756	0.0216168	0.0185136	0.00310322	Up	0.035062	NC	No	No	No	No
Pramef8	0.0137395	0.0128588	0.0146315	0.012521	0.0169199	0.0145827	0.00986062	0.00942074	0.00950819	0.00914289	0.0150238	0.0136775	0.0142089	0.0111056	0.00310327	Up	0.003804	NC	No	No	No	No
BC051226	0.00736205	0.00976989	0.0118328	0.00975392	0.0099699	0.0150906	0.00563487	0.00506944	0.0124289	0.00506622	0.00566377	0.0112686	0.0106299	0.00752198	0.00310789	Up	0.015868	NC	No	No	No	No
Tdrd3	0.0257348	0.0281533	0.023372	0.0268707	0.0226831	0.0211517	0.0269247	0.0258745	0.0164121	0.0213479	0.0208856	0.017854	0.0246609	0.0215498	0.00311113	Up	0.045848	NC	No	No	No	Yes
Dhrs7	0.0566795	0.0502504	0.0550099	0.0531054	0.052922	0.0522588	0.0569498	0.0464002	0.0548418	0.047059	0.0490699	0.0472315	0.053371	0.0502587	0.00311233	Up	0.032023	NC	No	No	No	No
Vsnl1	0.0263331	0.0220089	0.0217404	0.0191336	0.0282824	0.0263482	0.026823	0.0180038	0.0191889	0.0141021	0.0257218	0.021318	0.0239744	0.0208596	0.00311482	Up	0.014634	NC	No	Yes	No	No
Mrpl15	0.0340962	0.0281105	0.0273219	0.027177	0.0334708	0.0316835	0.0299505	0.0264151	0.0252367	0.0258607	0.0253961	0.0302996	0.03031	0.0271931	0.00311685	Up	0.034322	NC	No	No	No	No
Scmh1	0.0463514	0.050015	0.0439308	0.0473392	0.0530343	0.0494363	0.0404505	0.0501152	0.0413448	0.0472239	0.0462317	0.0460184	0.0483512	0.0452307	0.00312044	Up	0.044503	NC	No	No	No	No
Acin1	0.0583656	0.0556606	0.0557986	0.0555712	0.0589658	0.0619836	0.0533488	0.0493828	0.0554065	0.0517299	0.0583522	0.0593611	0.0577242	0.0545969	0.00312737	Up	0.023095	NC	No	No	No	No
Tmem135	0.0270468	0.0284478	0.0270506	0.0304294	0.032123	0.0297791	0.0225995	0.0255573	0.0282287	0.025456	0.0270227	0.027216	0.0291461	0.0260133	0.00313278	Up	0.022808	NC	No	No	No	Yes
Aqr	0.0280162	0.0267253	0.0275877	0.0262384	0.0281955	0.0248281	0.0260448	0.0223122	0.0220962	0.0269659	0.0249386	0.0204149	0.0269319	0.0237955	0.00313641	Up	0.018683	NC	No	No	No	No
Fgd6	0.0186119	0.0162509	0.0163426	0.0202203	0.0175548	0.020611	0.0165983	0.0124362	0.0136694	0.0162629	0.0141346	0.0175871	0.0182652	0.0151148	0.00315049	Up	0.000135	NC	No	No	No	No
Ppfia2	0.0182664	0.0209633	0.0133801	0.0186902	0.0133184	0.0124768	0.0124704	0.0155986	0.0140567	0.0146512	0.0108967	0.0105159	0.0161826	0.0130316	0.00315095	Up	0.024294	NC	No	No	No	No
Clstn3	0.0204934	0.0189266	0.0183866	0.0198436	0.0224221	0.0187901	0.01487	0.0129118	0.0166193	0.0177912	0.0198765	0.0178655	0.0198104	0.0166557	0.00315472	Up	0.015179	Up	No	No	No	No
Reep2	0.0122054	0.0164722	0.0190937	0.0150133	0.00975877	0.0116408	0.0098442	0.0134798	0.0126243	0.0101412	0.00708832	0.0120501	0.0140307	0.0108713	0.0031594	Up	0.021519	NC	No	No	No	No
Stx18	0.0313771	0.0267228	0.0374258	0.03004	0.034186	0.0313791	0.0280134	0.0235154	0.0334699	0.0249412	0.0318041	0.0304244	0.0318551	0.0286947	0.00316041	Up	0.002713	NC	Yes	No	No	No
Crbn	0.0216122	0.0257755	0.0226309	0.0248313	0.0265516	0.0263463	0.0214113	0.0206487	0.0196236	0.021085	0.0236797	0.022322	0.0246246	0.0214617	0.00316293	Up	0.005531	NC	No	Yes	No	No
Mrpl17	0.0621769	0.0566271	0.0714378	0.0620853	0.0646343	0.0724152	0.0559348	0.0548756	0.0684276	0.0587285	0.0627807	0.0696297	0.0648961	0.0617295	0.00316663	Up	0.005156	NC	No	No	No	No
Lmbr1l	0.012397	0.0115191	0.0136259	0.0110882	0.0113294	0.00942642	0.00821716	0.00739338	0.00943479	0.00642217	0.00913683	0.00974047	0.0115643	0.0083908	0.00317353	Up	0.009708	NC	Yes	No	No	No
Per3	0.0177196	0.0176478	0.0206566	0.0330182	0.0322822	0.0180861	0.0137351	0.0154956	0.0130096	0.0322638	0.0292633	0.0165948	0.0232351	0.0200604	0.0031747	Up	0.025307	NC	No	No	No	No
Rtf1	0.0424428	0.033211	0.0330549	0.034038	0.0471465	0.0413846	0.0369393	0.0265652	0.0315162	0.0338093	0.0450663	0.0382679	0.0385463	0.0353607	0.00318559	Up	0.024413	NC	No	No	No	No
1500004A13Rik	0.0274734	0.021146	0.0261476	0.0230377	0.0256019	0.0249159	0.0244964	0.0187598	0.0226746	0.0221133	0.0230911	0.018047	0.0247204	0.0215304	0.00319003	Up	0.011214	Down	No	No	No	No
Gtf3c1	0.0378892	0.0392213	0.0386691	0.0389251	0.0425788	0.0420797	0.032555	0.0337952	0.0393909	0.0355834	0.0410958	0.0377984	0.0398939	0.0367031	0.00319072	Up	0.022854	NC	No	Yes	No	No
Nacc2	0.0115964	0.0150162	0.0150776	0.0109191	0.0119891	0.0127677	0.0113407	0.00874427	0.00791718	0.00952001	0.0107876	0.00988053	0.0128943	0.00969837	0.00319596	Up	0.041322	NC	Yes	No	No	Yes
Tmem63b	0.036941	0.0310418	0.036923	0.0323454	0.035423	0.0401238	0.0312334	0.0256977	0.0365348	0.0298717	0.0311505	0.0391098	0.0354663	0.0322663	0.00320002	Up	0.017511	NC	No	No	No	No
Il17rc	0.00906656	0.0143513	0.0105866	0.00984882	0.00819199	0.0126475	0.00771691	0.00713602	0.00793847	0.00870042	0.00619547	0.00771261	0.0107821	0.00756665	0.00321548	Up	0.021502	NC	No	No	No	No
Alg11	0.0173943	0.0238529	0.01821	0.0201842	0.0192745	0.0202283	0.0148924	0.0182294	0.0155683	0.0167573	0.018047	0.0162979	0.0198574	0.016632	0.00322532	Up	0.003212	NC	No	No	No	No
Gon4l	0.0266642	0.0170251	0.0230915	0.0175057	0.0233638	0.02352	0.019932	0.018992	0.0190956	0.0134817	0.0203497	0.0199488	0.0218617	0.0186333	0.00322843	Up	0.039213	NC	No	No	No	No
AW554918	0.0155412	0.0169886	0.0185193	0.00963321	0.014758	0.0145564	0.0151316	0.0112272	0.0134193	0.00902338	0.0119372	0.00987411	0.0149994	0.0117688	0.00323063	Up	0.019146	NC	No	Yes	No	No
Xkr6	0.038802	0.035033	0.032007	0.0463177	0.0348695	0.03847	0.0374552	0.0305563	0.0289252	0.042683	0.0336658	0.0327961	0.0375832	0.0343469	0.00323627	Up	0.006268	NC	No	Yes	No	Yes
Ankrd44	0.0493182	0.0462689	0.0447383	0.0429525	0.0648344	0.0556823	0.0502224	0.0400384	0.0385908	0.0401092	0.0598476	0.055562	0.0506324	0.0473951	0.00323735	Up	0.049892	NC	No	No	No	No
Tulp3	0.0214307	0.02223	0.0227375	0.022514	0.0224909	0.0226953	0.0180492	0.0180641	0.0172637	0.0167027	0.0216596	0.022918	0.0223497	0.0191096	0.00324018	Up	0.023323	NC	Yes	No	No	No
Mvb12a	0.0234836	0.0243191	0.0258683	0.0230511	0.0199303	0.0216248	0.0183337	0.0174953	0.0224043	0.0189101	0.0209689	0.0206616	0.0230462	0.0197957	0.00325054	Up	0.038645	NC	No	No	No	No
Tspan9	0.0175097	0.0182639	0.0199154	0.0179241	0.0217197	0.0366892	0.0169854	0.0147368	0.018775	0.0138328	0.0161813	0.0320074	0.0220037	0.0187531	0.00325057	Up	0.010468	NC	Yes	Yes	Yes	No
Tmc6	0.0101653	0.0145872	0.015885	0.0151503	0.00861649	0.0121624	0.00747706	0.00922585	0.0130987	0.0100126	0.00833035	0.00885693	0.0127611	0.00950024	0.00326088	Up	0.007795	NC	Yes	No	No	No
Pcp4	0.0133968	0.0230462	0.0155702	0.0104123	0.006117	0.00589571	0.00895695	0.0165284	0.00990196	0.00818967	0.00583273	0.0054615	0.0124064	0.00914521	0.00326117	Up	0.030494	NC	No	Yes	No	No
Kcnk12	0.0129614	0.0135991	0.0116604	0.0111004	0.0123855	0.0115686	0.0106892	0.0108112	0.00541441	0.00961855	0.00971131	0.00744185	0.0122126	0.00894776	0.00326481	Up	0.00526	NC	No	Yes	Yes	Yes
Zfp64	0.0292442	0.030196	0.0246903	0.0252597	0.0259924	0.0261819	0.025698	0.0227347	0.024116	0.0203689	0.026654	0.0223851	0.0269274	0.0236595	0.00326794	Up	0.041734	NC	No	Yes	No	Yes
Csnk1g1	0.0492199	0.0426268	0.0435896	0.046159	0.0515155	0.0472168	0.043587	0.0405355	0.0380233	0.0409342	0.049176	0.0484308	0.0467213	0.0434478	0.00327347	Up	0.03203	NC	No	No	No	No
Mxd1	0.0493745	0.0449826	0.0520059	0.0456309	0.0530931	0.0425119	0.0440027	0.0399426	0.0514142	0.0412492	0.0500878	0.0411835	0.0479331	0.0446467	0.00328649	Up	0.009864	NC	No	No	No	No
Muc4	0.0176486	0.0168378	0.0213969	0.0243242	0.0183017	0.0182386	0.016289	0.0132481	0.0171679	0.0206751	0.0157699	0.0138727	0.019458	0.0161705	0.00328752	Up	0.000898	NC	Yes	No	No	No
Rab18	0.07304	0.10039	0.0914303	0.0869357	0.106053	0.101813	0.0728204	0.0947254	0.085958	0.0862464	0.099685	0.100451	0.093277	0.089981	0.00329595	Up	0.035302	NC	Yes	No	No	No
Coq9	0.0295445	0.0369968	0.035356	0.0352792	0.0310512	0.0387614	0.0300498	0.0318624	0.0334707	0.0299747	0.028776	0.0330695	0.0344982	0.0312005	0.00329767	Up	0.022362	NC	No	No	No	No
Bend7	0.0196666	0.0135353	0.0124353	0.0122986	0.0180979	0.0144709	0.0135374	0.00786576	0.00716582	0.011215	0.0181852	0.0127267	0.0150841	0.0117826	0.00330143	Up	0.030054	NC	No	Yes	No	No
Natd1	0.0177382	0.011184	0.0123459	0.0164788	0.0147237	0.0160076	0.0118997	0.00938256	0.00911767	0.0122197	0.0136433	0.0123944	0.0147464	0.0114429	0.00330347	Up	0.005198	NC	No	No	No	No
Ndfip1	0.0483829	0.0361767	0.0404177	0.0380618	0.0486576	0.0389359	0.0421872	0.0360072	0.0362149	0.038465	0.0417498	0.0360936	0.0417721	0.0384529	0.0033192	Up	0.043691	NC	No	No	Yes	No
1600012H06Rik	0.0296583	0.0290667	0.025994	0.0257573	0.0260142	0.0250864	0.0239019	0.025568	0.0227187	0.0223678	0.020781	0.0262479	0.0269295	0.0235976	0.00333192	Up	0.020388	Down	No	No	No	No
Atp8b2	0.0307587	0.0340226	0.0363776	0.0373366	0.0324764	0.0319785	0.0230307	0.0320405	0.0338646	0.0350862	0.0314548	0.0274792	0.0338251	0.0304927	0.00333239	Up	0.020334	NC	No	No	No	No
Limk2	0.0342745	0.0374285	0.0366644	0.0399987	0.0386876	0.0324648	0.032817	0.0287695	0.032958	0.0367595	0.0396015	0.0285831	0.0365864	0.0332481	0.00333831	Up	0.049619	NC	No	Yes	No	No
Xlr3a	0.0140441	0.0247366	0.0220912	0.00854297	0.0155314	0.0260248	0.00975088	0.0186621	0.0180165	0.00873801	0.0112924	0.0244349	0.0184952	0.0151491	0.00334605	Up	0.01484	NC	No	No	No	No
Ctps	0.0139536	0.0123653	0.0211169	0.0211583	0.0151439	0.0139014	0.00942379	0.011757	0.0162802	0.0138313	0.0123761	0.0138747	0.0162732	0.0129238	0.00334937	Up	0.0314	NC	No	No	No	No
Gm17334	0.0189579	0.016669	0.0184828	0.00962996	0.0224706	0.0287091	0.0154057	0.0150536	0.0153463	0.00967975	0.0192421	0.0200568	0.0191532	0.0157974	0.00335585	Up	0.037541	NC	No	No	No	No
Snap91	0.0264274	0.0197179	0.0182701	0.0185466	0.0275788	0.020675	0.0216523	0.0163589	0.0151054	0.0177579	0.0217392	0.0184413	0.0218693	0.0185091	0.00336016	Up	0.005886	NC	Yes	No	No	No
Cpt2	0.0348232	0.0334914	0.0404748	0.0361393	0.0367749	0.0338869	0.0301212	0.0329103	0.0378995	0.0317413	0.0323208	0.03042	0.0359317	0.0325688	0.00336291	Up	0.003393	NC	No	No	No	No
Coq2	0.0415448	0.044489	0.047251	0.0480919	0.0486257	0.0514345	0.0369468	0.040796	0.0422983	0.0473191	0.0443425	0.0495404	0.0469062	0.0435405	0.00336565	Up	0.004288	NC	No	No	No	No
Gemin6	0.0147481	0.0179043	0.0144391	0.0141726	0.0158648	0.0236001	0.0125419	0.0143476	0.00998147	0.0159756	0.0115418	0.0161283	0.0167882	0.0134194	0.00336873	Up	0.043329	NC	Yes	No	No	No
Pi4kb	0.0160922	0.0173079	0.0159988	0.019635	0.017292	0.0159814	0.0170581	0.00988709	0.0150013	0.0145996	0.0127757	0.0127294	0.0170512	0.0136752	0.00337604	Up	0.039909	NC	No	No	No	No
Slc25a29	0.0138971	0.0142726	0.0194053	0.0172016	0.00953257	0.0123506	0.0108309	0.0110551	0.0142929	0.00897811	0.010254	0.0109746	0.0144433	0.0110643	0.00337902	Up	0.04342	Up	No	No	No	No
Slc7a4	0.0249735	0.0248407	0.0355889	0.0193195	0.0257275	0.0248659	0.0241936	0.0180903	0.0311482	0.020432	0.0221569	0.0190194	0.025886	0.0225067	0.00337929	Up	0.040658	NC	No	No	No	No
Tsg101	0.0754132	0.0653127	0.0742873	0.0711232	0.0775726	0.0761591	0.0728396	0.0656905	0.067709	0.0647898	0.0754444	0.0730849	0.0733113	0.0699264	0.00338498	Up	0.026345	NC	No	No	No	No
Prmt2	0.0286553	0.0274871	0.028216	0.0259882	0.0276354	0.0295571	0.0301973	0.0205804	0.022919	0.0242349	0.0254426	0.023725	0.0279232	0.0245165	0.00340664	Up	0.046647	NC	No	No	No	No
Nrbp1	0.0302977	0.0292547	0.0332776	0.0352308	0.0226858	0.0306406	0.0245425	0.0289773	0.0316179	0.0288996	0.0218379	0.0250633	0.0302312	0.0268231	0.00340812	Up	0.029358	NC	No	No	No	No
Carhsp1	0.0310786	0.0324445	0.0358326	0.0320673	0.0376403	0.0356518	0.0295337	0.0285555	0.0352691	0.0306786	0.0316175	0.0285446	0.0341192	0.0306999	0.00341932	Up	0.026715	NC	No	No	No	No
Ifitm2	0.0284798	0.0236469	0.0278962	0.0320699	0.0281897	0.0315008	0.0274833	0.0181609	0.022131	0.0255975	0.0265041	0.0313453	0.0286306	0.0252037	0.00342688	Up	0.029393	NC	No	No	No	No
Vezf1	0.0716992	0.0693612	0.0739637	0.069463	0.0750294	0.0651282	0.0694298	0.0631275	0.0673391	0.0678277	0.0708643	0.0654773	0.0707741	0.0673443	0.00342985	Up	0.027806	NC	Yes	No	No	No
Zkscan17	0.017143	0.0235015	0.0222567	0.0125104	0.0217401	0.0197565	0.0172872	0.0191864	0.0144568	0.0127184	0.0174416	0.0151977	0.0194847	0.016048	0.0034367	Up	0.04181	NC	No	No	No	No
Dot1l	0.0267414	0.027194	0.0238752	0.0200917	0.0259105	0.023034	0.0225725	0.0195016	0.0227984	0.0205628	0.0235338	0.0172447	0.0244744	0.0210356	0.00343882	Up	0.039238	NC	Yes	No	No	No
Slc25a17	0.034813	0.0324763	0.0377181	0.036728	0.0430879	0.0356836	0.0330002	0.0267714	0.0313094	0.0330367	0.0384136	0.0373061	0.0367511	0.0333062	0.00344492	Up	0.03578	NC	Yes	No	Yes	No
Pfkm	0.0193844	0.0228586	0.0220635	0.0216454	0.0236037	0.0232686	0.0182697	0.0206353	0.0191791	0.0162867	0.0218684	0.015827	0.0221374	0.0186777	0.00345969	Up	0.017814	Up	No	No	No	No
Srgap1	0.0347182	0.0330493	0.0329283	0.0240056	0.0337486	0.031595	0.0302475	0.0310363	0.0273514	0.0233778	0.0319609	0.0252143	0.0316742	0.028198	0.00347614	Up	0.014471	NC	Yes	Yes	No	No
Mrpl28	0.0479092	0.0392785	0.0508826	0.0452272	0.047362	0.0564062	0.0424534	0.0379796	0.0513527	0.0409488	0.0442507	0.0492196	0.0478443	0.0443675	0.00347676	Up	0.028169	NC	No	No	No	No
Cers2	0.0331736	0.0308246	0.0365118	0.0356644	0.0301291	0.0295495	0.0256356	0.0307794	0.0331724	0.0294043	0.0300409	0.0259229	0.0326422	0.0291592	0.00348291	Up	0.0395	NC	No	No	No	No
BC029214	0.0280256	0.0290392	0.0292308	0.0310296	0.0285048	0.0303764	0.0238358	0.0269343	0.0291474	0.0228639	0.0235325	0.028957	0.0293677	0.0258785	0.00348924	Up	0.032387	NC	No	No	No	No
Tcf7l2	0.026962	0.0180494	0.0225214	0.0202244	0.0200983	0.0177227	0.022961	0.016171	0.0165714	0.015027	0.0176072	0.0163048	0.0209297	0.0174404	0.00348928	Up	0.005739	NC	Yes	No	No	No
BC022687	0.0132419	0.0164144	0.0189923	0.0191357	0.0258306	0.0221443	0.0132319	0.0120323	0.0171775	0.0142816	0.0213723	0.0166752	0.0192932	0.0157951	0.00349805	Up	0.009865	Up	No	No	No	No
Commd3	0.0303652	0.0285487	0.0354433	0.0310385	0.037221	0.040049	0.0266199	0.0287974	0.0279396	0.0260463	0.0347272	0.0375138	0.0337776	0.030274	0.00350356	Up	0.022039	NC	No	No	No	No
Ncam1	0.0780852	0.0730553	0.0693205	0.0706708	0.0872004	0.0737499	0.0745317	0.0709588	0.0595423	0.0708142	0.0840163	0.0711823	0.075347	0.071841	0.00350607	Up	0.04976	Up	Yes	Yes	No	No
Tbc1d8b	0.025257	0.0265184	0.0252409	0.0232825	0.0231079	0.0219431	0.0227831	0.0211305	0.0227377	0.0183189	0.020942	0.0182547	0.024225	0.0206945	0.00353048	Up	0.001533	NC	No	No	No	No
Gatc	0.0246211	0.0261041	0.0235316	0.0205364	0.0189158	0.0209322	0.0219387	0.0186428	0.0159442	0.0194997	0.0165218	0.0208854	0.0224402	0.0189054	0.00353475	Up	0.043949	NC	No	No	No	No
Cd99l2	0.0205454	0.0189325	0.0281285	0.0216855	0.0196384	0.0209522	0.0158063	0.0206194	0.0232015	0.0159847	0.0177529	0.0152952	0.0216471	0.01811	0.0035371	Up	0.031189	NC	No	No	No	Yes
D930016D06Rik	0.0285717	0.0294501	0.0233147	0.0288239	0.0257782	0.0267246	0.0299922	0.02348	0.0212782	0.0252592	0.0199863	0.0214442	0.0271105	0.0235733	0.0035372	Up	0.029054	NC	No	No	No	No
Wrnip1	0.0325623	0.0349614	0.0444755	0.0430686	0.0487937	0.0433189	0.0317617	0.0363129	0.0388934	0.0361224	0.0445464	0.0382839	0.0411967	0.0376535	0.00354327	Up	0.040505	NC	No	No	No	No
Iffo1	0.0211313	0.0179867	0.0215978	0.0204981	0.0215832	0.0219962	0.0140397	0.0133851	0.0225201	0.0175546	0.0166323	0.0193822	0.0207989	0.0172523	0.00354659	Up	0.023998	NC	Yes	No	No	No
Celsr3	0.0168199	0.018037	0.0210707	0.014026	0.0154251	0.0160698	0.0113265	0.0129705	0.0148911	0.0154574	0.014261	0.0112383	0.0169081	0.0133575	0.0035506	Up	0.034	NC	Yes	No	No	No
Tspan33	0.0193535	0.0204791	0.0221356	0.0157513	0.0144767	0.0130134	0.0120397	0.0173356	0.0189379	0.0158935	0.0101177	0.00935183	0.0175349	0.0139461	0.00358889	Up	0.014509	NC	No	No	No	Yes
Zfp282	0.0353424	0.0255232	0.0283941	0.0296035	0.0326014	0.0318397	0.0277562	0.019209	0.0268564	0.0287383	0.0295469	0.0296161	0.0305507	0.0269538	0.00359694	Up	0.023169	NC	No	No	No	No
Fbxo38	0.0382541	0.0305997	0.0374283	0.0423457	0.0434398	0.0384878	0.0345197	0.0273223	0.0320177	0.035384	0.0434938	0.0361884	0.0384259	0.034821	0.0036049	Up	0.01521	NC	No	No	No	No
Ndufaf3	0.0302457	0.0262615	0.0255975	0.0259234	0.0312321	0.0352203	0.0258616	0.0221576	0.023467	0.0265668	0.0264519	0.0283355	0.0290801	0.0254734	0.00360669	Up	0.018694	NC	No	No	No	No
H2afy2	0.0193748	0.0205164	0.0317809	0.0242211	0.0281446	0.0212839	0.0192653	0.0172514	0.0221113	0.0195971	0.025184	0.0202227	0.0242203	0.0206053	0.00361499	Up	0.046995	NC	Yes	No	No	No
Pccb	0.0592805	0.0593558	0.0608438	0.0601772	0.0616706	0.0638827	0.0556654	0.0576113	0.0572806	0.0575678	0.0527465	0.0626414	0.0608684	0.0572522	0.00361628	Up	0.024015	NC	Yes	No	No	Yes
Tspan17	0.0185447	0.0238473	0.0238715	0.0243494	0.0203837	0.02017	0.0176923	0.0178765	0.0173403	0.0213102	0.0179497	0.0172306	0.0218611	0.0182333	0.00362785	Up	0.009659	NC	Yes	Yes	No	No
Pomgnt1	0.0322863	0.0374579	0.0476657	0.0354977	0.0312198	0.0290263	0.0277689	0.0323305	0.0425211	0.0300983	0.0292899	0.0293753	0.0355256	0.0318973	0.00362828	Up	0.012475	NC	No	No	No	No
Crls1	0.0215707	0.0248963	0.0248218	0.0257834	0.0213729	0.0212482	0.0177686	0.0170084	0.0242082	0.018879	0.0216266	0.0183983	0.0232822	0.0196482	0.00363401	Up	0.041927	NC	No	No	No	No
Pmvk	0.025223	0.0243352	0.0339798	0.0266859	0.027619	0.0323429	0.0222886	0.0202249	0.0289099	0.026642	0.0235172	0.0267728	0.0283643	0.0247259	0.00363842	Up	0.006415	NC	No	No	No	No
Arfip1	0.0218831	0.034268	0.0332257	0.0260138	0.0281812	0.0207852	0.0199389	0.0268341	0.0294121	0.0211312	0.0246728	0.0205011	0.0273928	0.0237484	0.00364446	Up	0.014953	NC	No	No	No	No
Nkiras1	0.0325647	0.0317398	0.0342684	0.0313205	0.0348643	0.0371518	0.028079	0.0285542	0.0323423	0.0271827	0.0354937	0.0283845	0.0336516	0.0300061	0.00364554	Up	0.035277	NC	No	No	No	No
1810026J23Rik	0.0347227	0.0358384	0.0394197	0.0438848	0.0439331	0.0434103	0.0321462	0.0322351	0.0392324	0.0357623	0.0406611	0.0392824	0.0402015	0.0365532	0.00364825	Up	0.018204	NC	No	No	No	No
Fam45a	0.0194962	0.022677	0.0222579	0.0173087	0.0215548	0.0146282	0.0140793	0.0172492	0.0159636	0.0151451	0.016666	0.0169298	0.0196538	0.0160055	0.0036483	Up	0.039865	NC	No	No	No	No
Suclg2	0.0290121	0.0274323	0.0296615	0.0326021	0.0360618	0.0351511	0.02801	0.0196715	0.0249472	0.0327117	0.0317556	0.0308977	0.0316535	0.027999	0.00365453	Up	0.024928	NC	Yes	No	No	No
Kcnc3	0.0203045	0.0201574	0.0236075	0.017924	0.0224718	0.0203399	0.0161313	0.015459	0.0215547	0.0153557	0.0184647	0.0158563	0.0208008	0.017137	0.00366388	Up	0.000427	NC	Yes	No	No	No
Fbxo25	0.0284568	0.0275567	0.0246678	0.027768	0.0307944	0.0288599	0.0231814	0.0211648	0.0226009	0.0238703	0.0240599	0.031239	0.0280173	0.0243527	0.00366457	Up	0.046965	NC	No	No	No	No
Lclat1	0.0192876	0.0156443	0.016231	0.0224245	0.0161749	0.0137542	0.0162325	0.0128963	0.0135208	0.0147339	0.012161	0.0119841	0.0172527	0.0135881	0.00366466	Up	0.007895	NC	No	No	Yes	No
Tk2	0.0303451	0.0249206	0.0291219	0.0272462	0.0336797	0.0367917	0.0258419	0.0224175	0.0299283	0.0252979	0.0292658	0.0273645	0.0303509	0.026686	0.00366489	Up	0.047156	NC	No	Yes	No	No
Tenm4	0.0472317	0.0376845	0.0271686	0.046412	0.0295285	0.0213396	0.0468987	0.0305041	0.0209851	0.0413478	0.0276403	0.0199672	0.0348941	0.0312239	0.00367027	Up	0.024768	NC	Yes	Yes	Yes	Yes
Crtc1	0.0168031	0.019351	0.0265101	0.0191881	0.0184678	0.0201783	0.0172915	0.0137438	0.0188625	0.0174666	0.0151014	0.0159614	0.0200831	0.0164045	0.00367851	Up	0.025541	NC	No	No	No	No
Izumo4	0.0169997	0.0169457	0.015852	0.016339	0.0118297	0.0138941	0.0146568	0.012623	0.0082258	0.0107824	0.0114805	0.0119993	0.01531	0.011628	0.00368204	Up	0.019647	NC	No	No	No	No
Park7	0.101188	0.0869218	0.102654	0.111549	0.0733194	0.093084	0.0970956	0.0835279	0.100555	0.105764	0.070125	0.0895551	0.094786	0.0911038	0.00368218	Up	0.000712	NC	Yes	No	No	No
Znrf2	0.0498886	0.0550718	0.0522543	0.0490078	0.0539547	0.0520504	0.0470923	0.0498392	0.0460676	0.0496562	0.0493518	0.0481216	0.0520379	0.0483548	0.00368313	Up	0.013451	NC	No	Yes	Yes	Yes
Sipa1l1	0.0404491	0.0343391	0.0364203	0.034292	0.0347372	0.0341624	0.03374	0.0301634	0.0311785	0.0313618	0.0342794	0.0315638	0.0357334	0.0320478	0.00368552	Up	0.009149	NC	Yes	No	No	Yes
Timm17a	0.0377013	0.0332106	0.0347258	0.0381935	0.0466276	0.0393172	0.0326493	0.0354495	0.0303426	0.0307846	0.0419097	0.0364365	0.038296	0.0345953	0.00370064	Up	0.038721	NC	No	No	No	No
Nnt	0.0463896	0.047773	0.0513704	0.043974	0.0461461	0.037941	0.0396564	0.0416393	0.0444225	0.043468	0.0435675	0.0385922	0.045599	0.041891	0.00370804	Up	0.042155	NC	No	No	No	Yes
Krtcap3	0.020679	0.0172841	0.0146032	0.0167382	0.0156126	0.0135047	0.0126075	0.0104767	0.0127551	0.0147637	0.0144814	0.0110874	0.0164036	0.0126953	0.00370834	Up	0.027383	NC	No	No	No	No
Ino80d	0.0404066	0.0425263	0.0377647	0.034228	0.0385912	0.038122	0.0388096	0.0379595	0.0349968	0.0329526	0.0332496	0.0314186	0.0386064	0.0348978	0.00370863	Up	0.00867	NC	Yes	No	No	Yes
Cars2	0.0386671	0.0407735	0.0411242	0.0288811	0.0353985	0.0388944	0.0342392	0.0341493	0.0385106	0.0268133	0.0333818	0.0343798	0.0372898	0.033579	0.0037108	Up	0.004052	NC	No	No	No	No
Acad11	0.0316271	0.0266592	0.0398577	0.0290074	0.0349612	0.0271689	0.0317746	0.0210891	0.0306991	0.0263386	0.0306778	0.0264278	0.0315469	0.0278345	0.00371239	Up	0.044685	NC	Yes	No	No	No
Osbpl6	0.0343252	0.0253201	0.0235617	0.0381183	0.0249111	0.0262446	0.0303365	0.01665	0.0189538	0.0341128	0.025713	0.0243397	0.0287469	0.0250177	0.00372919	Up	0.033312	NC	No	No	No	No
Aven	0.0263126	0.0188319	0.0214133	0.0253512	0.020153	0.0303467	0.0174044	0.0157302	0.0160807	0.0223323	0.0183302	0.0301127	0.0237348	0.0199984	0.00373635	Up	0.029664	NC	No	Yes	Yes	No
Nmnat2	0.0119762	0.010402	0.0130928	0.0113372	0.0114532	0.0216484	0.00868495	0.0062452	0.00870221	0.00774166	0.0087856	0.0172983	0.0133183	0.00957631	0.00374199	Up	4.2e-05	NC	No	No	No	No
Hs3st6	0.0242408	0.022198	0.033832	0.0240966	0.0260032	0.0223982	0.0185839	0.0170535	0.0277417	0.0236604	0.0191512	0.0241176	0.0254615	0.021718	0.00374342	Up	0.047505	NC	Yes	No	No	No
Crem	0.0441857	0.0500069	0.0441579	0.0484058	0.0511485	0.0430304	0.043533	0.0477348	0.0442072	0.0444279	0.0425777	0.0359844	0.0468225	0.0430775	0.00374502	Up	0.045965	NC	No	No	No	No
Galr1	0.037938	0.0508411	0.050769	0.0398311	0.0489883	0.0352478	0.0297421	0.0465131	0.0481762	0.0378189	0.0484844	0.0303944	0.0439359	0.0401882	0.00374769	Up	0.019021	NC	No	No	Yes	No
Slc35e1	0.0362583	0.0375297	0.0435199	0.0321799	0.0356481	0.032408	0.0276351	0.0325802	0.0393706	0.0300583	0.0351903	0.0301674	0.0362573	0.0325003	0.00375699	Up	0.02374	NC	No	No	No	No
Trappc12	0.0379473	0.0357207	0.0416759	0.0468356	0.0573747	0.0418683	0.0348915	0.0303637	0.0356703	0.0463834	0.0533109	0.0381675	0.0435704	0.0397979	0.00377253	Up	0.005219	NC	No	No	No	No
Crb3	0.0453874	0.0471827	0.0505635	0.0432987	0.048008	0.0464184	0.0390783	0.0452209	0.0425453	0.0390752	0.0500076	0.0422001	0.0468098	0.0430212	0.00378856	Up	0.0456	NC	No	No	No	No
Nphp4	0.0101156	0.0115109	0.0145092	0.00960977	0.00995266	0.00843842	0.00858418	0.00481218	0.00816046	0.00637073	0.00892531	0.0044724	0.0106894	0.00688754	0.00380187	Up	0.011064	NC	Yes	No	Yes	Yes
Slc25a14	0.0386659	0.0360022	0.0371241	0.0469225	0.0446936	0.0426973	0.0371653	0.0330266	0.0308365	0.0437587	0.0414555	0.0370336	0.0410176	0.0372127	0.00380489	Up	0.0036	NC	No	Yes	No	No
Gm6999	0.0359383	0.0522314	0.0435664	0.0260561	0.0639395	0.0433911	0.0352262	0.0447369	0.0423056	0.023617	0.0612772	0.0350709	0.0441871	0.0403723	0.00381482	Up	0.035233	NC	No	No	No	No
Zdbf2	0.0398526	0.0461073	0.0431943	0.0378296	0.0497464	0.0374548	0.0353198	0.0461535	0.0367525	0.0371614	0.0446386	0.0311741	0.0423642	0.0385333	0.00383085	Up	0.021032	NC	Yes	No	No	Yes
Adprh	0.0529175	0.052463	0.0531252	0.050213	0.0508874	0.0516265	0.0448591	0.0539409	0.0524035	0.0445295	0.0467038	0.0457801	0.0518721	0.0480361	0.00383597	Up	0.045993	NC	No	No	No	No
Ift52	0.0433065	0.039647	0.0418914	0.0404357	0.0417957	0.0413237	0.0415366	0.0331016	0.0363411	0.0338839	0.0425962	0.0378408	0.0414	0.03755	0.00384996	Up	0.024114	NC	No	No	No	No
2010204K13Rik	0.0246342	0.0267437	0.0279918	0.0185838	0.0168726	0.0153845	0.0209467	0.022055	0.0233133	0.011808	0.0154272	0.013534	0.0217018	0.0178474	0.00385437	Up	0.005106	NC	No	No	No	No
Fam118b	0.0336644	0.0267468	0.0405966	0.0310438	0.0314144	0.0351454	0.0278311	0.0235989	0.0387851	0.0236244	0.0313947	0.0301733	0.0331019	0.0292346	0.00386732	Up	0.017843	NC	No	No	No	No
Tuft1	0.035448	0.0353952	0.0333528	0.0333831	0.0412648	0.0381334	0.0341276	0.0283616	0.034437	0.0281101	0.0374432	0.0312745	0.0361629	0.0322923	0.00387052	Up	0.032212	Up	Yes	No	Yes	No
Eml4	0.0371255	0.0269106	0.0210366	0.0246095	0.0322083	0.0305301	0.0347429	0.0168368	0.0204501	0.0231407	0.0281586	0.0258586	0.0287368	0.0248646	0.00387214	Up	0.038598	NC	No	Yes	No	No
Svop	0.0157129	0.0253372	0.0221079	0.0222126	0.0218408	0.0193399	0.0161308	0.0171706	0.0200633	0.0184736	0.0169553	0.0144793	0.0210919	0.0172122	0.0038797	Up	0.022171	NC	No	No	No	No
Dnajc25	0.0210446	0.0213063	0.02298	0.0189619	0.0240222	0.0208376	0.0201932	0.0175168	0.0191826	0.0150103	0.0161049	0.0177286	0.0215254	0.0176228	0.00390266	Up	0.008606	NC	No	No	No	No
Dapk3	0.0303527	0.0344516	0.0376436	0.0337554	0.0197175	0.0321915	0.0223628	0.0284487	0.0327488	0.0322052	0.0201708	0.0287373	0.0313521	0.0274456	0.00390646	Up	0.02603	Up	No	No	No	No
Kif1c	0.0252396	0.0253721	0.0228476	0.0230742	0.0265132	0.023882	0.0213884	0.0196926	0.0176486	0.0203958	0.0251703	0.0191113	0.0244881	0.0205678	0.00392027	Up	0.002125	NC	No	No	No	No
Map2k4	0.0334057	0.0296229	0.0300918	0.029044	0.0356346	0.034571	0.0281726	0.0281189	0.0243873	0.0236231	0.0307672	0.0337591	0.0320617	0.028138	0.00392362	Up	0.006841	Up	Yes	No	No	No
Chd6	0.0391098	0.0374539	0.0341001	0.0331225	0.0406963	0.0324552	0.0351805	0.0286439	0.0306015	0.0314046	0.0399106	0.0276505	0.0361563	0.0322319	0.00392438	Up	0.018884	NC	No	No	Yes	No
Cdc42bpa	0.0524694	0.0395061	0.0419942	0.0407286	0.0484929	0.0407828	0.0500498	0.0381361	0.0381879	0.0365336	0.0418098	0.0356952	0.0439957	0.0400687	0.00392694	Up	0.003796	NC	No	Yes	Yes	No
C2cd5	0.0423577	0.0443503	0.0479607	0.0409929	0.0453774	0.0420969	0.0411558	0.037316	0.0431152	0.0365687	0.0432271	0.0381499	0.043856	0.0399221	0.00393386	Up	0.005505	NC	No	No	No	No
Rnf19a	0.0226529	0.0273641	0.0209949	0.0247935	0.0290989	0.0267432	0.0193374	0.0192345	0.0209692	0.0182382	0.0284912	0.021729	0.0252746	0.0213332	0.00394135	Up	0.030676	NC	No	No	No	No
Cwc25	0.0244666	0.0183762	0.02098	0.0178473	0.0207706	0.0179319	0.0187977	0.0148986	0.0114931	0.0188807	0.0173641	0.0152263	0.0200621	0.0161101	0.00395202	Up	0.038789	Up	No	No	No	No
Parp10	0.0179769	0.0184338	0.0189968	0.0244274	0.0145836	0.0172214	0.0144074	0.0150981	0.0175181	0.015369	0.0109858	0.0144895	0.0186067	0.0146447	0.00396198	Up	0.013944	NC	No	No	No	No
Exoc1	0.0317642	0.0298982	0.0343358	0.036159	0.0243757	0.0332792	0.0287451	0.0260579	0.0288862	0.032997	0.0234026	0.0259363	0.0316354	0.0276709	0.0039645	Up	0.006885	NC	No	No	Yes	No
Pycrl	0.0268323	0.0246404	0.025426	0.0257469	0.025879	0.025508	0.0223477	0.017912	0.0262123	0.0231021	0.0220414	0.018618	0.0256721	0.0217056	0.00396651	Up	0.019216	NC	No	No	No	No
Gabbr1	0.0268316	0.0234791	0.0209001	0.0231095	0.0262603	0.0242585	0.0191224	0.015408	0.0172387	0.0229556	0.0262749	0.0199865	0.0241398	0.0201644	0.00397548	Up	0.039003	NC	No	No	No	No
Mtf1	0.0403035	0.0422798	0.0391016	0.0430005	0.0431755	0.0472068	0.0372448	0.0326128	0.0359468	0.0407304	0.0395529	0.0451236	0.0425113	0.0385352	0.00397605	Up	0.018821	NC	No	No	No	No
Ufd1l	0.0537494	0.0474669	0.0716956	0.0510599	0.060074	0.0619866	0.0501783	0.046725	0.0632901	0.0458643	0.0554426	0.0605657	0.0576721	0.0536777	0.0039944	Up	0.016967	NC	No	No	No	No
Flot2	0.0303084	0.0291297	0.0368343	0.0316066	0.031354	0.034141	0.0257673	0.0291141	0.0348836	0.023612	0.0274473	0.0284524	0.032229	0.0282128	0.00401622	Up	0.017025	NC	No	No	No	No
Pop7	0.0231559	0.0238767	0.0257048	0.0218204	0.0237836	0.024625	0.0197062	0.0197884	0.0209338	0.0178287	0.0168072	0.0237718	0.0238277	0.019806	0.00402171	Up	0.004222	NC	No	No	Yes	No
Setd7	0.0414931	0.0394882	0.0434257	0.0402346	0.0540423	0.0520232	0.0375546	0.0325438	0.036213	0.0413465	0.0498337	0.0488738	0.0451179	0.0410609	0.00405697	Up	0.02193	NC	No	No	No	No
Prdx4	0.0358965	0.0296657	0.0282226	0.0337414	0.0301884	0.0297636	0.0336935	0.0299472	0.0238234	0.0296392	0.0230817	0.0229278	0.0312464	0.0271855	0.00406092	Up	0.016495	NC	No	No	No	No
Fam19a5	0.0342449	0.0394728	0.0396246	0.0378493	0.0435131	0.045189	0.0341164	0.031492	0.0366614	0.0299467	0.0378945	0.045325	0.0399823	0.035906	0.00407631	Up	0.041213	NC	Yes	Yes	No	Yes
Phc2	0.0377136	0.0420442	0.0417354	0.038304	0.0335672	0.03394	0.035999	0.0339472	0.036092	0.0361963	0.0279438	0.0326402	0.0378841	0.0338031	0.00408099	Up	0.015252	Up	No	No	Yes	No
Tmem51	0.027606	0.0219702	0.0249882	0.0216085	0.0246938	0.0277904	0.021653	0.021643	0.0170974	0.020629	0.0172339	0.0258364	0.0247762	0.0206821	0.00409406	Up	0.031778	NC	No	Yes	Yes	No
Lats1	0.039217	0.0444899	0.0430504	0.0419771	0.0398514	0.038991	0.0340787	0.0387484	0.0429089	0.0419894	0.0308369	0.0344386	0.0412628	0.0371668	0.00409597	Up	0.034618	Up	No	No	No	No
Mical2	0.022607	0.027286	0.0227754	0.0202664	0.0226441	0.021916	0.0201325	0.0177181	0.0224289	0.0181468	0.0191009	0.0153709	0.0229158	0.0188164	0.00409948	Up	0.03087	NC	No	Yes	No	No
l7Rn6	0.0434584	0.0326685	0.0320624	0.0360857	0.0331019	0.0296651	0.0383209	0.0283055	0.0240456	0.03505	0.0309661	0.0257558	0.034507	0.0304073	0.00409967	Up	0.009211	NC	No	No	No	No
Cog5	0.0331113	0.0334364	0.0342223	0.0295091	0.0322149	0.0296388	0.0283914	0.0296831	0.0344986	0.0228241	0.026487	0.025646	0.0320221	0.0279217	0.00410046	Up	0.00874	Up	No	No	No	No
Il13ra1	0.0105295	0.0205606	0.0224259	0.0142428	0.0156663	0.023141	0.0121268	0.0131306	0.0158782	0.0105039	0.012829	0.0174613	0.017761	0.013655	0.004106	Up	0.02788	NC	No	No	No	No
Toporsos	0.03092	0.0333845	0.0329422	0.0262325	0.0298623	0.0316433	0.0224207	0.0304328	0.0262154	0.0234183	0.0300892	0.0277682	0.0308308	0.0267241	0.00410669	Up	0.022785	Up	No	No	No	No
Eps15l1	0.0319675	0.0313782	0.033218	0.0279233	0.0331966	0.0292865	0.0258385	0.0223412	0.0288004	0.0236034	0.0316192	0.0301184	0.0311617	0.0270535	0.00410819	Up	0.032956	NC	No	No	No	No
Lrig2	0.0370822	0.0292541	0.0339886	0.027258	0.0383196	0.0311486	0.0327436	0.021775	0.0323288	0.0296051	0.0324066	0.0234673	0.0328419	0.0287211	0.00412077	Up	0.047994	NC	No	Yes	No	No
Rps6kb1	0.0415109	0.0388545	0.0414101	0.0410833	0.0464891	0.0392755	0.0349278	0.0356035	0.0330121	0.0381463	0.0425855	0.0396187	0.0414372	0.0373156	0.0041216	Up	0.021224	NC	No	No	No	No
Napb	0.0201633	0.0229826	0.0168075	0.022686	0.0155135	0.0150597	0.0167727	0.0129868	0.0153861	0.0173344	0.0125392	0.0134509	0.0188688	0.014745	0.00412376	Up	0.025425	NC	No	No	No	No
Ago2	0.0710415	0.0822142	0.0786921	0.0650648	0.0743263	0.065558	0.0712755	0.0772982	0.0763118	0.0612881	0.067045	0.0589018	0.0728161	0.0686867	0.00412941	Up	0.015311	NC	Yes	No	No	Yes
Ptk2	0.0515518	0.0561756	0.0472689	0.0406735	0.0530612	0.0468222	0.045078	0.051881	0.0437526	0.0373561	0.0493356	0.0433533	0.0492589	0.0451261	0.00413276	Up	0.000379	NC	No	No	No	No
Ccdc92	0.0313826	0.0306859	0.0372769	0.0349642	0.0363737	0.0409185	0.0326424	0.027198	0.0323908	0.0313477	0.0314334	0.0317881	0.035267	0.0311334	0.00413357	Up	0.029187	NC	No	No	Yes	No
Zfp664	0.0427591	0.0426455	0.045506	0.055383	0.0528176	0.049692	0.0438985	0.0346126	0.0436912	0.0502966	0.0455591	0.0459416	0.0481339	0.044	0.00413391	Up	0.032151	NC	No	No	Yes	No
Ctdnep1	0.0356295	0.0350139	0.0409406	0.0382015	0.0335439	0.0336034	0.0322966	0.0293874	0.0352207	0.0315038	0.0320481	0.031592	0.0361555	0.0320081	0.00414739	Up	0.005368	NC	No	No	No	No
Tpm4	0.0238569	0.0282324	0.0241095	0.0205856	0.0246446	0.0203711	0.0221488	0.0187159	0.0187319	0.0178779	0.0189236	0.0205174	0.0236333	0.0194859	0.00414743	Up	0.031857	NC	No	No	No	No
Kcnc2	0.0138553	0.0188439	0.00902734	0.00910414	0.00916152	0.00521528	0.00756764	0.00871436	0.00648688	0.00800081	0.00640227	0.00311965	0.0108679	0.00671527	0.00415265	Up	0.030897	NC	No	Yes	No	No
Bhlhb9	0.02767	0.0280857	0.0309609	0.029212	0.0274497	0.0246149	0.026026	0.0208948	0.022029	0.0251826	0.0280818	0.0207924	0.0279989	0.0238344	0.00416445	Up	0.033346	NC	No	No	No	No
Usp38	0.0321765	0.0367154	0.0344049	0.0328544	0.0386082	0.0334764	0.0303084	0.0277035	0.0268649	0.0299401	0.0365148	0.0318539	0.034706	0.0305309	0.00417502	Up	0.025199	NC	No	No	No	No
Map6	0.020101	0.0206631	0.0229278	0.0252721	0.0220065	0.0237604	0.0210513	0.0179372	0.0140282	0.0192789	0.0194715	0.01791	0.0224551	0.0182795	0.00417565	Up	0.031336	NC	No	No	No	No
Dffb	0.0219191	0.0268285	0.0277875	0.0222439	0.0255068	0.0316506	0.0158284	0.0268414	0.0278215	0.0183339	0.0177859	0.0242367	0.0259894	0.021808	0.00418144	Up	0.033507	NC	No	No	No	No
Nipsnap1	0.0296645	0.0369576	0.0387705	0.035497	0.0378419	0.0348834	0.0255417	0.029494	0.0373528	0.0316366	0.0358782	0.0285829	0.0356025	0.0314144	0.00418812	Up	0.007421	NC	No	No	No	No
D10Jhu81e	0.0373302	0.0360679	0.0436169	0.0433574	0.048721	0.0406011	0.0351317	0.0293391	0.0402301	0.0397333	0.0439469	0.036093	0.0416157	0.0374124	0.00420338	Up	0.001124	NC	Yes	No	No	No
Igsf5	0.0149528	0.0182569	0.018249	0.0145678	0.0137182	0.0203454	0.0106515	0.0112509	0.0140056	0.0134061	0.0118603	0.0136775	0.0166817	0.0124753	0.00420636	Up	0.007705	NC	No	Yes	Yes	No
Mesdc2	0.0380323	0.0347772	0.0379104	0.0387974	0.0376086	0.0320893	0.0353939	0.0270175	0.0328352	0.0300267	0.0347521	0.0338689	0.0365359	0.0323157	0.00422016	Up	0.043764	NC	No	No	No	No
Rab11fip3	0.0322903	0.031134	0.031322	0.0330811	0.031097	0.0314128	0.0290829	0.0245066	0.027465	0.031736	0.0276881	0.0245274	0.0317229	0.027501	0.00422186	Up	0.004784	NC	No	No	No	No
Rpia	0.0478171	0.0437947	0.0494312	0.0549267	0.0570454	0.0487856	0.0472157	0.0346933	0.0446202	0.0538801	0.0508556	0.0451304	0.0503001	0.0460659	0.00423425	Up	0.023194	NC	No	No	No	No
Sqle	0.0471665	0.0593371	0.0615537	0.0532132	0.0574217	0.0542843	0.0394956	0.0558764	0.0583734	0.0476847	0.0527367	0.0533934	0.0554961	0.05126	0.00423605	Up	0.006393	NC	Yes	No	Yes	Yes
Dym	0.0352202	0.0339885	0.0385427	0.0294813	0.0292954	0.0356163	0.0305178	0.034264	0.029755	0.027441	0.0261592	0.0285116	0.0336907	0.0294414	0.00424932	Up	0.026169	NC	No	Yes	No	No
Ffar3	0.0230748	0.0146854	0.018575	0.0175846	0.0211752	0.021493	0.0173798	0.0146025	0.0127795	0.0149014	0.016464	0.0149333	0.0194313	0.0151768	0.00425456	Up	0.007974	NC	No	No	No	No
Plpp6	0.0360174	0.0282802	0.032735	0.0337541	0.0372147	0.0324425	0.0297096	0.0267993	0.0288994	0.0293903	0.0323102	0.0277294	0.0334073	0.0291397	0.00426761	Up	0.00124	NC	No	No	No	No
Pmpcb	0.0475418	0.041361	0.048126	0.0517041	0.0434773	0.0450818	0.0438197	0.0383229	0.0416284	0.0447847	0.0427628	0.0403254	0.0462154	0.0419406	0.0042747	Up	0.00621	NC	No	No	No	No
Prom1	0.0161317	0.0156189	0.0216601	0.0101355	0.0153311	0.0156637	0.0123324	0.0148255	0.0147801	0.00582901	0.0102556	0.010802	0.0157568	0.0114708	0.00428607	Up	0.003371	NC	No	No	No	No
Rspo4	0.0166119	0.0213683	0.0223515	0.0162051	0.0173283	0.0146638	0.011104	0.0158135	0.0153367	0.0129236	0.0145489	0.013081	0.0180882	0.0138013	0.00428687	Up	0.003748	NC	No	No	Yes	No
Tdp1	0.017491	0.0238352	0.0194738	0.0185735	0.0151443	0.0169248	0.0158491	0.0129742	0.0153935	0.0127602	0.0153105	0.0134068	0.0185738	0.0142824	0.00429139	Up	0.040259	NC	No	No	No	No
Eif2b2	0.046223	0.0418855	0.0500729	0.0536075	0.0361534	0.0445952	0.0433524	0.039141	0.0452008	0.0417648	0.0346325	0.0426557	0.0454229	0.0411245	0.00429837	Up	0.041829	NC	No	No	No	No
Fam73a	0.0345755	0.0337543	0.0292858	0.0322373	0.0367004	0.0349137	0.0286014	0.0293403	0.0221154	0.0323898	0.0353344	0.0278869	0.0335778	0.029278	0.00429982	Up	0.018479	NC	No	No	No	No
Tat	0.0217513	0.0116315	0.0144432	0.0194283	0.0164792	0.0221362	0.0137813	0.0139518	0.00982826	0.0162629	0.0110299	0.0151836	0.0176449	0.0133396	0.00430529	Up	0.034601	NC	Yes	No	No	No
2410002F23Rik	0.0264111	0.0330805	0.0265578	0.0271564	0.0269332	0.0258744	0.0222422	0.0255647	0.0243798	0.0240801	0.0211519	0.0227626	0.0276689	0.0233635	0.00430537	Up	0.003253	NC	No	No	No	No
Mrpl40	0.0293204	0.023812	0.0342851	0.032003	0.0301434	0.0332088	0.0273248	0.0227691	0.0270496	0.0250896	0.0291429	0.0255272	0.0304621	0.0261505	0.00431159	Up	0.023394	NC	No	No	No	No
Stx16	0.0535611	0.0509775	0.0601884	0.0585483	0.0598854	0.0737455	0.0507205	0.0430873	0.054119	0.0523686	0.0580692	0.0726279	0.0594844	0.0551654	0.00431896	Up	0.012146	NC	Yes	No	No	No
Fam96a	0.0453963	0.0409665	0.045743	0.0437215	0.0469733	0.0432914	0.0425402	0.0365452	0.0382891	0.0380146	0.0429748	0.0417672	0.0443487	0.0400218	0.00432685	Up	0.003856	NC	No	No	No	No
Sgk2	0.0200404	0.0186246	0.0225392	0.0223693	0.01917	0.0134198	0.0129677	0.0173395	0.014895	0.0154416	0.0181647	0.0113822	0.0193605	0.0150318	0.00432877	Up	0.020882	NC	No	No	No	No
Eml1	0.0246892	0.0250841	0.0278384	0.0226506	0.0174475	0.0169518	0.016189	0.0217008	0.0212573	0.0154686	0.0167792	0.0172852	0.0224436	0.0181133	0.00433025	Up	0.033581	Up	No	No	No	No
Ptprk	0.0202069	0.0246423	0.0169542	0.0189977	0.0157204	0.0153655	0.0151712	0.0167619	0.012717	0.0152158	0.014918	0.0110631	0.0186478	0.0143078	0.00433999	Up	0.005459	NC	No	No	No	No
Crebl2	0.0235617	0.0234672	0.0222086	0.0262726	0.0254849	0.0267396	0.0176815	0.0177733	0.0179496	0.0184676	0.0257857	0.0239741	0.0246224	0.020272	0.00435044	Up	0.013202	NC	No	No	No	No
Caly	0.00574997	0.0137722	0.00815356	0.00485534	0.0104708	0.00906811	0.00318286	0.00528231	0.00356134	0.00458306	0.00544228	0.00387555	0.00867834	0.00432123	0.00435711	Up	0.011851	NC	Yes	No	No	No
Uap1	0.0356615	0.0324974	0.0427405	0.0371559	0.0380983	0.0380223	0.0276839	0.0308821	0.0368437	0.0343778	0.0360291	0.0321936	0.0373627	0.0330017	0.00436097	Up	0.008785	NC	No	No	No	No
F8a	0.0403871	0.0460171	0.0492844	0.040939	0.049261	0.0512388	0.0397361	0.0432856	0.0478747	0.0377737	0.0422552	0.0400263	0.0461879	0.0418253	0.00436263	Up	0.044724	NC	No	Yes	No	No
Fbp1	0.010439	0.00889585	0.0040148	0.00951209	0.0141909	0.0161741	0.0056431	0.00393113	0.00310131	0.00640901	0.00785827	0.0101003	0.0105378	0.00617385	0.00436395	Up	0.003365	NC	No	No	Yes	Yes
Camta2	0.0240288	0.0291344	0.0275891	0.0258816	0.0209242	0.0234102	0.0203366	0.0203087	0.020801	0.020306	0.0210658	0.0219587	0.0251614	0.0207961	0.00436522	Up	0.024509	NC	No	No	No	No
As3mt	0.0652214	0.0652183	0.0693047	0.0682765	0.0714157	0.0704887	0.0643128	0.0594636	0.0659214	0.0579218	0.0673924	0.0687	0.0683209	0.063952	0.00436888	Up	0.025188	NC	No	No	No	No
Mbd6	0.0284404	0.0279462	0.0358693	0.0321332	0.0248703	0.0317704	0.0272643	0.022039	0.0279083	0.030875	0.0209318	0.0257862	0.0301716	0.0258008	0.00437085	Up	0.011563	NC	No	No	No	No
Smg5	0.0253027	0.0163262	0.0223019	0.0221839	0.0198915	0.022723	0.0163139	0.0151948	0.0186685	0.0150105	0.0167843	0.0204988	0.0214549	0.0170785	0.00437638	Up	0.016953	NC	No	No	No	No
Prkx	0.0195199	0.0347448	0.0273193	0.0202311	0.0271722	0.0272132	0.016401	0.0271657	0.0213024	0.0155629	0.0233294	0.0261232	0.0260334	0.0216474	0.00438599	Up	0.005155	NC	No	Yes	No	No
Gcn1l1	0.0194598	0.0217491	0.025012	0.0168413	0.0151781	0.0206294	0.0173719	0.0182868	0.0166764	0.0140901	0.0135013	0.0126183	0.0198116	0.0154241	0.00438751	Up	0.015762	NC	No	No	No	No
Mtmr3	0.0569728	0.0480701	0.047694	0.0532013	0.0536588	0.0434074	0.0473049	0.0434178	0.0439443	0.0532907	0.0483658	0.0403206	0.0505007	0.0461074	0.00439335	Up	0.019847	NC	No	No	No	No
Synpr	0.0435366	0.0320045	0.0255492	0.0334454	0.0415833	0.0455606	0.0376634	0.021746	0.0270307	0.0307506	0.0376579	0.0403208	0.0369466	0.0325282	0.00441836	Up	0.038189	Up	No	Yes	No	No
Wdr18	0.0197471	0.0260071	0.0262568	0.0217049	0.0189542	0.0210578	0.017487	0.0181083	0.0190951	0.0181247	0.0176589	0.0167309	0.022288	0.0178675	0.00442047	Up	0.009298	NC	No	No	Yes	No
Mms19	0.031809	0.0280862	0.0340427	0.0263728	0.0333847	0.0333005	0.026302	0.0202531	0.0348837	0.0266263	0.0282111	0.0240261	0.031166	0.0267171	0.00444893	Up	0.04707	NC	No	No	No	No
Klc1	0.069081	0.0625192	0.0687648	0.0728876	0.0714258	0.0775658	0.0691716	0.0612403	0.0591325	0.064142	0.0688889	0.0729725	0.070374	0.0659246	0.00444941	Up	0.041257	Up	No	No	No	No
Xrcc1	0.0253319	0.0251377	0.0280598	0.0293952	0.0272516	0.0215939	0.0220719	0.0159274	0.0240193	0.0288452	0.019752	0.019439	0.0261283	0.0216758	0.00445253	Up	0.021054	NC	No	No	No	No
Smpd2	0.032548	0.0295133	0.0299444	0.0353669	0.0287449	0.0276234	0.0262857	0.027126	0.0280258	0.0276792	0.0276306	0.0202224	0.0306235	0.0261616	0.00446189	Up	0.014401	Down	No	No	No	No
Nek1	0.0182585	0.019502	0.0207903	0.0180303	0.0214043	0.0184327	0.014959	0.0170514	0.0132187	0.015423	0.0183907	0.010567	0.019403	0.014935	0.00446805	Up	0.007617	NC	No	No	No	No
Usp53	0.0138517	0.0143286	0.0162437	0.0184095	0.0176619	0.0181116	0.0119473	0.0112231	0.00920191	0.0133497	0.0156445	0.0103848	0.0164345	0.0119586	0.00447596	Up	0.007485	NC	No	No	No	No
Abca7	0.0286758	0.0264032	0.0306645	0.0251735	0.0241124	0.0274562	0.0216856	0.0254829	0.0206768	0.025216	0.0191949	0.0233503	0.0270809	0.0226011	0.00447987	Up	0.032597	Down	Yes	No	No	No
Gemin7	0.0252212	0.0293113	0.0335898	0.0213357	0.0265887	0.0247541	0.0211248	0.0236813	0.024329	0.0233134	0.0235477	0.0179013	0.0268001	0.0223163	0.00448387	Up	0.03539	NC	No	No	No	No
Prpf4	0.0260396	0.0203362	0.0200963	0.0223519	0.0241405	0.0292413	0.0217788	0.0199317	0.0153896	0.0164025	0.019696	0.0221039	0.023701	0.0192171	0.00448387	Up	0.004789	NC	No	No	No	No
Kansl3	0.0289643	0.0245361	0.0285828	0.0339546	0.0353508	0.0303668	0.0249757	0.0214764	0.027584	0.0305751	0.0262104	0.0239791	0.0302926	0.0258001	0.00449242	Up	0.012058	NC	No	No	No	No
Mettl16	0.0315742	0.0251879	0.0291088	0.0251592	0.0262349	0.0216971	0.0192373	0.0244586	0.0240799	0.0209894	0.025296	0.0178916	0.0264937	0.0219921	0.00450153	Up	0.04763	NC	No	Yes	No	No
Nudt4	0.0504224	0.0423566	0.0440405	0.0644309	0.0465064	0.0499714	0.0506705	0.0367687	0.0386378	0.053998	0.0444333	0.0461165	0.0496213	0.0451041	0.00451722	Up	0.028611	NC	Yes	No	No	Yes
Ndufa7	0.0800022	0.0714021	0.0778998	0.0692132	0.0837554	0.0944796	0.0702981	0.0673785	0.0796456	0.0617459	0.0825107	0.0879379	0.0794587	0.0749195	0.00453928	Up	0.046964	NC	No	No	No	No
Arf2	0.020283	0.0255162	0.0268893	0.0211421	0.0248567	0.0244628	0.0158648	0.0224451	0.0179159	0.0188643	0.0226597	0.0181228	0.0238584	0.0193121	0.00454624	Up	0.008746	NC	No	Yes	No	No
Ubfd1	0.0556123	0.0476957	0.0659027	0.0654136	0.0592903	0.0577844	0.0492336	0.0474827	0.0622043	0.0619282	0.0576503	0.0458814	0.0586165	0.0540634	0.00455311	Up	0.043779	NC	No	No	No	No
Etv1	0.0206737	0.0150833	0.0193465	0.0195193	0.0178048	0.0122708	0.0147031	0.0101807	0.0127859	0.0127287	0.017122	0.00983079	0.0174497	0.0128919	0.00455785	Up	0.006328	NC	No	No	No	Yes
Hes6	0.0383316	0.0412288	0.0458668	0.0410505	0.0428199	0.0432412	0.0298423	0.036777	0.0414576	0.0364618	0.0413773	0.0392223	0.0420898	0.0375231	0.00456675	Up	0.004268	NC	No	No	No	No
Tmem38a	0.0372832	0.0325835	0.0461053	0.0314963	0.0318342	0.0290164	0.0375545	0.0309134	0.0367343	0.0260441	0.0255451	0.0241072	0.0347198	0.0301498	0.00457004	Up	0.02231	Up	No	No	No	No
Slc44a3	0.0367939	0.0409687	0.0427491	0.0381743	0.0335371	0.0332735	0.0343318	0.0327923	0.0351426	0.029867	0.0337899	0.0321294	0.0375828	0.0330088	0.00457394	Up	0.034555	NC	Yes	No	No	No
Psen2	0.0502199	0.0484006	0.0571604	0.0453062	0.0520052	0.0485792	0.047941	0.0494766	0.0497922	0.0426688	0.0466734	0.0376083	0.0502786	0.0456934	0.00458518	Up	0.045773	NC	Yes	No	No	No
Bcl7b	0.0438649	0.0419749	0.0439155	0.043219	0.0509207	0.0416133	0.0332314	0.037315	0.0423574	0.0405159	0.0463645	0.0381691	0.0442514	0.0396589	0.00459252	Up	0.016624	Up	No	No	No	No
Ptp4a3	0.0375123	0.0426522	0.0534262	0.0412603	0.033938	0.036467	0.0320243	0.0318071	0.0480006	0.0385548	0.0340353	0.0331941	0.040876	0.0362694	0.00460663	Up	0.028027	NC	No	No	No	No
Ythdf1	0.0410359	0.0397258	0.045155	0.0447421	0.0547207	0.0506907	0.0336108	0.0376848	0.0410535	0.0449056	0.0478136	0.0433593	0.0460117	0.0414046	0.00460706	Up	0.016226	NC	Yes	No	No	No
Mta1	0.045407	0.0424749	0.0443386	0.0447441	0.0473014	0.0455488	0.039618	0.0338673	0.0357285	0.0421763	0.0478618	0.0428839	0.0449691	0.040356	0.00461315	Up	0.02802	NC	No	No	No	No
Plekha6	0.0522755	0.0598299	0.0632983	0.0574051	0.0627742	0.0626183	0.0502506	0.0550242	0.0557352	0.0545058	0.0623405	0.0526271	0.0597002	0.0550806	0.00461969	Up	0.025554	NC	No	No	No	No
Dbpht2	0.0229781	0.0311565	0.015181	0.0289319	0.0157137	0.0144508	0.0177312	0.0217639	0.0153092	0.0225611	0.0135426	0.00974685	0.021402	0.0167758	0.00462621	Up	0.01877	Up	No	No	No	No
Ehmt2	0.0485393	0.0461996	0.0613544	0.056243	0.0518068	0.0569052	0.0478271	0.0459107	0.0514851	0.0485468	0.0486762	0.0508439	0.053508	0.0488816	0.0046264	Up	0.033037	Up	No	No	No	No
Arl2	0.0310695	0.0293162	0.0339519	0.0261334	0.0287198	0.0314699	0.0219703	0.0214962	0.0296851	0.0236626	0.0284108	0.0276625	0.0301101	0.0254812	0.00462888	Up	0.018422	NC	No	No	No	No
Tpst2	0.0688344	0.0742074	0.0853911	0.0769797	0.0954059	0.0843929	0.0659058	0.0636363	0.0783291	0.0753039	0.0909365	0.0833112	0.0808685	0.0762372	0.00463138	Up	0.02579	NC	No	No	No	No
Usp5	0.031574	0.0301451	0.036291	0.0324602	0.0355648	0.033041	0.0241121	0.0219873	0.0360398	0.0323386	0.0259447	0.030858	0.0331793	0.0285468	0.00463257	Up	0.044784	NC	No	No	No	No
Mrpl10	0.047974	0.0489337	0.0529624	0.0507214	0.0455023	0.0531279	0.0399652	0.0440207	0.0500314	0.0455714	0.0409341	0.0508394	0.0498703	0.045227	0.00464323	Up	0.002379	NC	No	No	No	No
Zfp367	0.0353784	0.0466745	0.0494153	0.0369415	0.0485017	0.0485611	0.0325057	0.0407905	0.0458798	0.0349084	0.0396457	0.0438374	0.0442454	0.0395946	0.00465079	Up	0.005764	NC	No	No	No	No
Ssbp1	0.0580523	0.0582009	0.0564027	0.0605684	0.0635083	0.0569989	0.051369	0.0498046	0.0497579	0.0550608	0.0670373	0.0527878	0.0589553	0.0543029	0.00465236	Up	0.043486	NC	No	No	No	No
March3	0.0647363	0.057757	0.0711956	0.0571113	0.0730086	0.0619958	0.0548359	0.0518407	0.0637821	0.0552358	0.0744329	0.057471	0.0643008	0.0595997	0.00470102	Up	0.03566	NC	No	No	No	No
Aak1	0.074495	0.0713362	0.0733828	0.0687064	0.072161	0.0697933	0.0647357	0.0704715	0.0658783	0.0693699	0.0672956	0.0638947	0.0716458	0.066941	0.00470482	Up	0.033392	NC	No	No	No	No
Slc2a13	0.0254957	0.025055	0.0229595	0.0286601	0.0331344	0.0417311	0.0220324	0.0241493	0.0175154	0.0280547	0.0275766	0.0294576	0.029506	0.0247977	0.00470832	Up	0.042862	NC	No	No	No	No
Zcchc14	0.030842	0.0261199	0.0262138	0.0260276	0.0316676	0.0289785	0.0237593	0.0194699	0.020833	0.0264395	0.0299684	0.0210357	0.0283082	0.0235843	0.00472391	Up	0.01784	NC	No	Yes	Yes	No
Sgsm2	0.061512	0.0380963	0.0477596	0.0489131	0.0542693	0.0562686	0.058734	0.0327241	0.0438276	0.0475384	0.0437345	0.0518873	0.0511365	0.0464077	0.00472883	Up	0.014512	Up	No	Yes	No	No
Hist3h2ba	0.0235346	0.0230533	0.0213451	0.0216962	0.0167516	0.0108547	0.0178204	0.0138839	0.0188117	0.01654	0.0103058	0.01145	0.0195392	0.014802	0.00473728	Up	0.018489	Up	No	No	No	No
Kat7	0.0405366	0.0458574	0.0427339	0.0484461	0.0548727	0.0500772	0.0393202	0.0438553	0.0409565	0.0418765	0.050663	0.0373934	0.0470873	0.0423441	0.00474319	Up	0.044899	NC	No	No	No	No
Rbm15b	0.0590363	0.0612067	0.0797571	0.0615004	0.0554466	0.0634643	0.0554826	0.0583602	0.0694048	0.0535752	0.0524811	0.0625994	0.0634019	0.0586505	0.00475139	Up	0.023127	Down	No	No	No	No
Erich3	0.0235832	0.0294935	0.0321241	0.028778	0.0321754	0.0247775	0.0226565	0.0202084	0.031333	0.0189501	0.0249702	0.0242739	0.0284886	0.023732	0.00475661	Up	0.048477	Up	No	Yes	Yes	No
Nfx1	0.0421225	0.0425644	0.0439927	0.0435458	0.0458356	0.0371162	0.0409046	0.0343967	0.0383906	0.0372423	0.0401401	0.0355271	0.0425295	0.0377669	0.00476263	Up	0.008317	NC	No	No	No	No
Ankle2	0.0417745	0.0317859	0.0304247	0.0365335	0.0372348	0.0395123	0.0382133	0.0263064	0.0335678	0.0296499	0.0307616	0.030148	0.036211	0.0314412	0.00476978	Up	0.042357	NC	No	No	No	No
Chid1	0.0604667	0.0508952	0.0601326	0.0443059	0.0396999	0.0461072	0.0521843	0.0459203	0.0594773	0.0407702	0.0346712	0.0399475	0.0502679	0.0454951	0.00477281	Up	0.006041	NC	No	No	Yes	No
Map2k3	0.0176369	0.0243268	0.02788	0.020845	0.0200219	0.0198545	0.0146581	0.016564	0.0153668	0.0176656	0.0183908	0.0192137	0.0217609	0.0169765	0.00478437	Up	0.048227	NC	No	No	No	No
Fasn	0.0381673	0.0407472	0.0475237	0.0416304	0.0440403	0.0430335	0.0292198	0.0329499	0.0425994	0.0368023	0.0396951	0.0450684	0.0425237	0.0377225	0.00480126	Up	0.027604	NC	No	No	No	No
Gm7334	0.0857683	0.0888242	0.0971188	0.108606	0.101432	0.0997628	0.0814349	0.085678	0.0915465	0.101614	0.0972219	0.09519	0.0969187	0.0921143	0.0048044	Up	0.000299	Up	No	No	No	No
Tmco3	0.037465	0.0455514	0.0442862	0.0424608	0.0495382	0.0449922	0.0357626	0.0357842	0.0400187	0.0410009	0.0441412	0.038725	0.044049	0.0392388	0.0048102	Up	0.012705	NC	No	No	No	No
Rad17	0.0366791	0.0460599	0.0425502	0.0385489	0.042685	0.0388401	0.035949	0.0368976	0.0379963	0.0339445	0.0362778	0.035424	0.0408939	0.0360815	0.00481232	Up	0.008844	NC	No	No	No	No
Bace1	0.0574541	0.0486396	0.0531296	0.058222	0.0709387	0.0609444	0.0499565	0.0495033	0.0430219	0.050158	0.0687301	0.0590322	0.0582214	0.0534003	0.00482107	Up	0.041037	NC	Yes	No	No	No
Glyr1	0.0810737	0.0972819	0.0973039	0.0920439	0.114051	0.101193	0.071782	0.0914455	0.0990631	0.086778	0.109983	0.0949372	0.0971579	0.0923314	0.00482644	Up	0.023302	NC	No	No	No	No
Arhgap26	0.0351689	0.0334188	0.04029	0.0323392	0.0381111	0.0359031	0.0310281	0.0305336	0.0310556	0.0312335	0.0320059	0.0303914	0.0358718	0.0310414	0.00483049	Up	0.008463	NC	No	Yes	No	Yes
Emd	0.0785396	0.0939933	0.116622	0.0795707	0.0860588	0.0959839	0.0754433	0.0924082	0.109846	0.0693068	0.0793088	0.095223	0.0917947	0.0869227	0.00487202	Up	0.02249	NC	No	No	No	No
Pdgfd	0.0535765	0.0522242	0.0543175	0.044452	0.0370075	0.0561846	0.0450131	0.0501337	0.0520697	0.0338996	0.0348981	0.0524949	0.0496271	0.0447515	0.00487554	Up	0.023939	NC	No	No	No	No
Nploc4	0.0473096	0.0534935	0.0512156	0.0475205	0.0510798	0.0563266	0.0458382	0.0449495	0.0516369	0.0408852	0.0481234	0.046244	0.0511576	0.0462795	0.00487808	Up	0.035207	NC	No	No	No	No
Alkbh1	0.0523295	0.0437009	0.05296	0.0492295	0.0393794	0.0394225	0.0452197	0.035817	0.0442616	0.0437739	0.0400976	0.0385754	0.0461703	0.0412909	0.00487941	Up	0.02826	NC	No	No	No	No
Stard5	0.0231933	0.0174636	0.020198	0.0239285	0.0205019	0.0142117	0.021264	0.011538	0.0122333	0.0201645	0.0157679	0.00909432	0.0199162	0.0150103	0.00490582	Up	0.001969	NC	No	No	No	No
Rundc1	0.0446749	0.0416947	0.0470401	0.0434336	0.0495883	0.0542812	0.0398365	0.0337014	0.0464616	0.0410714	0.0449602	0.0452322	0.0467854	0.0418772	0.00490822	Up	0.013587	NC	No	No	No	No
Uchl1	0.0161401	0.0267406	0.0141236	0.0217677	0.0236532	0.0217148	0.014715	0.020106	0.0114293	0.015815	0.0125839	0.0200352	0.02069	0.0157807	0.00490928	Up	0.023309	NC	No	No	No	No
Myt1	0.0392373	0.0437946	0.0399695	0.0425865	0.0442432	0.0410837	0.0335248	0.0359921	0.0351585	0.0406267	0.0378442	0.0383112	0.0418191	0.0369096	0.00490955	Up	0.00287	NC	No	No	No	No
Nck2	0.0380218	0.0346016	0.037136	0.0381969	0.0382141	0.0346929	0.0342409	0.0238318	0.034944	0.0367524	0.0343979	0.0272383	0.0368106	0.0319009	0.00490969	Up	0.01932	NC	No	Yes	No	No
Pon2	0.0204009	0.0236774	0.0236304	0.0216942	0.0215146	0.0224431	0.0184572	0.0177387	0.0177042	0.017244	0.0167019	0.0158919	0.0222268	0.0172896	0.00493711	Up	0.000765	NC	Yes	No	No	No
Psmd11	0.0633771	0.071196	0.0689813	0.0650058	0.0803298	0.0756825	0.0613587	0.0634617	0.0665404	0.0649733	0.0702739	0.068239	0.0707621	0.0658078	0.00495425	Up	0.028395	NC	No	No	No	No
Fam104a	0.0581294	0.0532268	0.0584853	0.0654791	0.0508994	0.0530053	0.0504877	0.0453458	0.0607814	0.0636888	0.0407858	0.0483482	0.0565376	0.051573	0.00496459	Up	0.045277	NC	No	Yes	No	Yes
Ece2	0.0359499	0.0259701	0.036431	0.0292588	0.033412	0.0309894	0.0331825	0.0208365	0.029973	0.023888	0.0284862	0.0258489	0.0320019	0.0270358	0.00496603	Up	0.000165	NC	No	No	No	No
Npnt	0.0221626	0.0249549	0.0248002	0.0230817	0.024994	0.0196557	0.0191131	0.0162472	0.0150074	0.0243778	0.0170135	0.0180458	0.0232748	0.0183008	0.00497404	Up	0.041912	NC	No	No	No	Yes
Irgq	0.0297628	0.0289636	0.0360313	0.0283548	0.0337347	0.0295636	0.0276822	0.0201783	0.0313949	0.0278502	0.0254934	0.02384	0.0310685	0.0260732	0.0049953	Up	0.013772	NC	No	No	No	No
Ndufs4	0.0761057	0.0597434	0.0662865	0.0589803	0.0736826	0.0781295	0.0740542	0.0548147	0.0572681	0.0509452	0.0745369	0.0712859	0.0688213	0.0638175	0.00500382	Up	0.023045	NC	Yes	Yes	No	No
Phf23	0.0254957	0.0271949	0.0343764	0.0363785	0.0332322	0.0319301	0.0256617	0.0248442	0.0256634	0.0243556	0.0312011	0.0267756	0.0314347	0.0264169	0.00501772	Up	0.044148	NC	No	No	No	No
Mark3	0.0786179	0.061204	0.0716186	0.0681946	0.0655628	0.0695195	0.0697671	0.0509828	0.0700233	0.066872	0.066095	0.060828	0.0691195	0.0640947	0.00502486	Up	0.047817	NC	Yes	No	No	No
Nomo1	0.0385218	0.0444887	0.0471081	0.0374617	0.0319558	0.0372952	0.0306305	0.0381688	0.0429624	0.0308892	0.0288646	0.0351391	0.0394719	0.0344424	0.00502948	Up	0.002703	NC	No	No	No	No
Cdk5r2	0.0385087	0.0421228	0.0436191	0.0392189	0.043649	0.0473143	0.0327199	0.0339469	0.0409041	0.0370428	0.0392456	0.0403918	0.0424055	0.0373752	0.00503024	Up	0.003435	NC	Yes	No	No	No
Cebpg	0.0498268	0.0482507	0.0430048	0.0472011	0.0509153	0.057884	0.0456301	0.0427339	0.0383663	0.0483174	0.0437515	0.0480591	0.0495138	0.0444764	0.0050374	Up	0.019545	NC	No	Yes	No	No
Lyplal1	0.0662323	0.0521761	0.0640551	0.078138	0.060068	0.0642808	0.0607863	0.0491932	0.0563059	0.0721026	0.0601254	0.0561301	0.0641584	0.0591073	0.00505111	Up	0.010557	NC	Yes	No	Yes	Yes
Ppa1	0.0616392	0.0547243	0.0671832	0.0530123	0.0476218	0.0460908	0.0516778	0.0535475	0.0586957	0.0515419	0.0400063	0.0444563	0.0550453	0.0499876	0.00505772	Up	0.028125	Down	No	No	No	No
Exoc6b	0.0912225	0.0810743	0.0761315	0.0896819	0.0910888	0.0782865	0.0872983	0.0684585	0.0758796	0.0845235	0.0898716	0.0710911	0.0845809	0.0795204	0.00506051	Up	0.039823	NC	No	No	No	No
Entpd7	0.0490912	0.0557224	0.0652769	0.0469083	0.0560105	0.053757	0.0421607	0.0478833	0.057724	0.0473653	0.0567283	0.0445087	0.0544611	0.049395	0.00506602	Up	0.038364	NC	No	No	No	No
B930041F14Rik	0.0372889	0.0340083	0.0382176	0.0344818	0.0378742	0.0343997	0.0277129	0.0267338	0.0342589	0.0315825	0.0318789	0.0336303	0.0360451	0.0309662	0.00507885	Up	0.011224	NC	No	No	No	No
Rogdi	0.0618121	0.0526253	0.0640028	0.0658014	0.0516044	0.0673421	0.0611026	0.0500704	0.0534395	0.0602573	0.0475239	0.060296	0.0605313	0.0554483	0.00508307	Up	0.01595	NC	No	No	No	No
Trp53i11	0.0195519	0.0234192	0.0286144	0.0211709	0.0245712	0.0372448	0.0214626	0.0167667	0.0163144	0.019306	0.0192124	0.0310093	0.0257621	0.0206786	0.00508352	Up	0.048607	NC	No	No	No	No
Zzef1	0.0556637	0.0616538	0.0660571	0.0563476	0.0679053	0.0565895	0.0489026	0.054677	0.0655226	0.0583778	0.0595241	0.0467072	0.0607028	0.0556186	0.00508429	Up	0.046198	NC	No	No	No	No
E330009J07Rik	0.0433326	0.0389321	0.0399491	0.0416203	0.0445688	0.0394611	0.0409629	0.0350491	0.0281409	0.0382183	0.0408171	0.0340983	0.0413107	0.0362144	0.00509624	Up	0.014852	NC	Yes	No	No	No
Ddx1	0.0612573	0.0602091	0.0660897	0.0661586	0.0546117	0.0477215	0.0504262	0.0498582	0.0640133	0.060178	0.0529078	0.0480396	0.0593413	0.0542372	0.00510415	Up	0.045372	NC	No	No	No	No
Syt11	0.0470217	0.0424899	0.0413614	0.0405018	0.050839	0.0456656	0.0422355	0.0335196	0.0357988	0.035717	0.0440492	0.045914	0.0446466	0.039539	0.00510756	Up	0.009472	NC	No	No	No	No
Exoc7	0.031895	0.0318708	0.0296993	0.0316938	0.0312823	0.0325924	0.0305137	0.0222378	0.0256731	0.0236897	0.0257757	0.0304876	0.0315056	0.0263963	0.0051093	Up	0.012124	Up	No	No	No	No
Tm2d2	0.046336	0.0486104	0.0593068	0.0472526	0.0407289	0.0464186	0.0381346	0.0398787	0.057607	0.0417167	0.0380111	0.0425183	0.0481089	0.0429777	0.00513113	Up	0.007328	NC	No	No	No	No
Myh14	0.0181494	0.0213427	0.021124	0.0212535	0.0207492	0.034402	0.0115098	0.015096	0.0133602	0.0224795	0.0134354	0.0303353	0.0228368	0.0177027	0.00513409	Up	0.013535	Up	Yes	No	No	No
Rab33b	0.0403405	0.0432421	0.0436467	0.044198	0.0477403	0.0447236	0.03359	0.038393	0.0429308	0.0385007	0.0406873	0.0389813	0.0439819	0.0388472	0.00513469	Up	0.002815	Up	No	No	No	No
Gprasp2	0.0321681	0.0383701	0.0310104	0.0312118	0.0340943	0.0286512	0.022282	0.0287472	0.0271331	0.0238148	0.0314081	0.0312672	0.0325843	0.0274421	0.00514226	Up	0.047051	NC	No	No	No	No
Rgs16	0.0399047	0.0532649	0.0526354	0.0359385	0.0435776	0.042731	0.036551	0.0448663	0.0510265	0.0321193	0.0376002	0.0350273	0.0446754	0.0395318	0.00514358	Up	0.00514	NC	No	Yes	No	No
Zfp644	0.0354859	0.034424	0.0377141	0.033736	0.0339252	0.035866	0.0291781	0.0302662	0.0306023	0.0303582	0.0303371	0.0294837	0.0351919	0.0300376	0.00515426	Up	0.000572	NC	Yes	No	No	No
Atp6v0e2	0.0687596	0.0655164	0.0830126	0.0746349	0.0698717	0.0810618	0.060902	0.0619008	0.0738053	0.0744836	0.0646141	0.0761062	0.0738095	0.0686353	0.00517413	Up	0.010731	NC	Yes	No	No	Yes
Rps6kb2	0.0147101	0.0222563	0.0215644	0.0209436	0.0178686	0.0183757	0.0125063	0.0148112	0.0178983	0.0169767	0.0120666	0.0103737	0.0192864	0.0141055	0.00518098	Up	0.0026	NC	No	No	No	No
Chpf	0.0651609	0.0727904	0.0851117	0.0543153	0.0514294	0.0612641	0.0547992	0.0667411	0.0828678	0.0505759	0.0454311	0.0584546	0.065012	0.0598116	0.00520038	Up	0.007975	NC	No	No	Yes	No
Ntan1	0.0349095	0.0379595	0.0391659	0.0377877	0.0421864	0.038229	0.0341897	0.0391343	0.030908	0.0334314	0.0346522	0.0266846	0.038373	0.0331667	0.00520628	Up	0.045856	NC	Yes	No	No	No
Ddx24	0.0590237	0.0564052	0.0643946	0.0631875	0.079043	0.0776539	0.0573816	0.0553391	0.0620363	0.0507301	0.0742364	0.068732	0.066618	0.0614092	0.00520872	Up	0.038404	NC	No	No	No	No
Gpatch2	0.0621328	0.0568006	0.0541041	0.0576034	0.0678344	0.0654583	0.0578719	0.0532677	0.0417029	0.0582598	0.0611502	0.0603063	0.0606556	0.0554265	0.00522912	Up	0.0306	NC	Yes	No	No	No
2300009A05Rik	0.0767323	0.0806619	0.0868241	0.0791161	0.0774002	0.0853346	0.0746212	0.0777405	0.0778351	0.0742584	0.0739979	0.0762299	0.0810115	0.0757805	0.00523104	Up	0.008918	Up	No	No	No	No
Glce	0.0322055	0.027328	0.0347971	0.0324349	0.0421069	0.0317602	0.0270209	0.0246705	0.0269059	0.0270219	0.0338921	0.0297102	0.0334387	0.0282036	0.00523517	Up	0.004069	NC	No	No	No	No
Ndufs6	0.096614	0.0783665	0.0998302	0.090558	0.0946843	0.0980655	0.0887059	0.0733687	0.0905637	0.0877792	0.09113	0.0951466	0.0930197	0.0877824	0.00523739	Up	0.005466	NC	No	No	No	No
Cers4	0.0182937	0.0238633	0.0191532	0.0174869	0.0158203	0.0144971	0.0141186	0.0115163	0.016533	0.0113231	0.015587	0.00847537	0.0181858	0.0129256	0.00526019	Up	0.026126	NC	No	No	Yes	No
Adgrl1	0.0539222	0.0534846	0.054096	0.0596696	0.0493587	0.0540499	0.0486116	0.0440138	0.0555849	0.0489093	0.0487974	0.0470501	0.0540968	0.0488279	0.00526897	Up	0.045448	NC	No	No	Yes	No
Capn2	0.0357441	0.0373957	0.0385153	0.0385745	0.0327722	0.0312986	0.0333383	0.0283926	0.030985	0.0283833	0.0313884	0.0301513	0.0357167	0.0304398	0.00527688	Up	0.025038	NC	Yes	No	No	No
2810428I15Rik	0.0325207	0.0310759	0.0417448	0.0348881	0.0286074	0.0433993	0.0309011	0.0265079	0.0341736	0.0296074	0.0228818	0.0364197	0.0353727	0.0300819	0.00529078	Up	0.001658	Down	No	Yes	No	No
Ndrg3	0.076898	0.0741585	0.0901765	0.0893879	0.0711336	0.0811662	0.0774702	0.0650066	0.0825623	0.0778071	0.0691891	0.0791258	0.0804868	0.0751935	0.00529327	Up	0.043202	Up	No	No	No	No
1110051M20Rik	0.0742063	0.0709396	0.0752845	0.0716001	0.0812443	0.0677831	0.068101	0.0664876	0.072627	0.0613094	0.0777877	0.0629475	0.0735096	0.06821	0.0052996	Up	0.00497	NC	No	No	No	No
Ina	0.061833	0.0593824	0.0597645	0.0568165	0.0745897	0.0645679	0.0523564	0.0584982	0.0598682	0.0491149	0.0647122	0.0605109	0.0628257	0.0575101	0.00531553	Up	0.03022	NC	No	Yes	No	No
Necap1	0.0396707	0.0472764	0.0531868	0.0545462	0.0484363	0.0436204	0.0363841	0.0380287	0.0481724	0.0471979	0.0501774	0.0347924	0.0477895	0.0424588	0.00533065	Up	0.025384	NC	No	Yes	No	No
Ppp1r13b	0.0351557	0.0317554	0.0341483	0.0362481	0.0314524	0.0314586	0.028397	0.0230293	0.0266937	0.0316495	0.0271347	0.0313293	0.0333697	0.0280389	0.00533081	Up	0.007914	NC	No	Yes	No	No
Zer1	0.0526583	0.0482507	0.050793	0.0488585	0.055559	0.0583056	0.0418023	0.0396919	0.0428613	0.0476384	0.053367	0.0570691	0.0524042	0.0470717	0.00533253	Up	0.028164	NC	No	No	No	No
Tmem117	0.0443146	0.0364308	0.0404178	0.0279935	0.0300338	0.0375015	0.0322295	0.0370786	0.032379	0.0252699	0.0227947	0.0348076	0.0361153	0.0307599	0.00535545	Up	0.03592	NC	Yes	Yes	No	Yes
Ube2q1	0.0824674	0.08418	0.0828649	0.0851783	0.0930379	0.0895997	0.0733503	0.0757293	0.0771624	0.0785483	0.0929123	0.0874911	0.0862214	0.0808656	0.00535577	Up	0.014214	NC	No	No	No	No
Irf2	0.0443099	0.0368146	0.0399049	0.0415854	0.0418183	0.0403958	0.0356396	0.0328266	0.0350317	0.0360041	0.0395307	0.033642	0.0408048	0.0354458	0.00535903	Up	0.001948	NC	No	No	No	No
Zfp266	0.0460702	0.0420366	0.0435134	0.0468284	0.0508843	0.0427717	0.0426928	0.0382706	0.0318135	0.0441905	0.0492186	0.0336214	0.0453508	0.0399679	0.00538285	Up	0.022604	Up	No	No	No	No
B9d1	0.0272221	0.0264896	0.0249574	0.0262614	0.0238621	0.0260139	0.0197613	0.017947	0.0246891	0.0206462	0.0178686	0.0215457	0.0258011	0.0204096	0.00539147	Up	0.005995	NC	No	Yes	No	No
Egln2	0.0598286	0.0592101	0.0578308	0.0610985	0.0563937	0.0587552	0.0514874	0.0502309	0.0552078	0.0577959	0.0504935	0.0555414	0.0588528	0.0534595	0.00539334	Up	0.005085	NC	No	No	Yes	No
Tob1	0.0696587	0.0765288	0.0837079	0.0720572	0.0610922	0.0557852	0.0651348	0.0643886	0.0805421	0.0675847	0.0549847	0.05378	0.069805	0.0644025	0.0054025	Up	0.014049	NC	Yes	No	Yes	No
Fto	0.0754789	0.0643265	0.0736095	0.0619233	0.0823777	0.0724987	0.0717489	0.060644	0.0660999	0.0567439	0.0788032	0.0637269	0.0717024	0.0662944	0.005408	Up	0.001944	NC	No	Yes	No	No
Fam63a	0.023908	0.0297134	0.0262216	0.0246706	0.0243747	0.0215376	0.0188997	0.0144052	0.0237122	0.0207434	0.0212761	0.0189271	0.025071	0.0196606	0.00541038	Up	0.04361	NC	No	No	No	No
Plcb4	0.0275862	0.0289344	0.0279061	0.0253054	0.0263834	0.019624	0.0195011	0.0247163	0.0221131	0.0176452	0.0195426	0.0197492	0.0259566	0.0205446	0.00541202	Up	0.00737	NC	No	Yes	Yes	No
Golph3l	0.0391957	0.0447509	0.0582232	0.0509677	0.0504073	0.0468359	0.0365982	0.0345532	0.059563	0.0398538	0.0461509	0.0411526	0.0483968	0.0429786	0.00541818	Up	0.036881	NC	No	No	No	No
Gopc	0.0492798	0.0472392	0.0512034	0.0461821	0.0438847	0.0444664	0.0470279	0.0375376	0.0442255	0.0386566	0.043875	0.0384044	0.0470426	0.0416212	0.00542145	Up	0.014207	NC	No	Yes	No	No
Gpr180	0.0341397	0.0382285	0.0448395	0.0344509	0.0292319	0.0325054	0.0277725	0.0375474	0.0351407	0.0251589	0.0252576	0.0299866	0.035566	0.0301439	0.00542205	Up	0.015159	NC	No	Yes	No	No
Fkbp8	0.0541719	0.0631231	0.0687622	0.0565355	0.0549541	0.0685902	0.0546123	0.0564126	0.0607494	0.0526933	0.0509461	0.0580526	0.0610228	0.0555777	0.00544511	Up	0.017635	NC	No	No	No	No
Akr1c13	0.0342334	0.0330528	0.0340239	0.0316946	0.0336146	0.0302813	0.0255361	0.0241557	0.0257465	0.0286258	0.0296551	0.0305076	0.0328168	0.0273711	0.00544562	Up	0.016363	NC	No	No	No	No
Mirg	0.0513426	0.0309683	0.038546	0.0415695	0.0486117	0.043782	0.0485448	0.0253903	0.0322293	0.0313518	0.0436032	0.0410125	0.04247	0.037022	0.00544807	Up	0.004686	NC	No	No	No	No
Cfap36	0.0567313	0.0701745	0.0758319	0.0689387	0.0523824	0.0582402	0.0544804	0.0622393	0.0746671	0.065026	0.0482446	0.0449384	0.0637165	0.058266	0.00545049	Up	0.030879	NC	No	No	No	No
Plcxd3	0.0570714	0.0492764	0.0516157	0.046831	0.0670284	0.0635421	0.0560952	0.0427614	0.0451846	0.0422778	0.0629612	0.0533658	0.0558942	0.050441	0.00545317	Up	0.007367	NC	No	No	No	No
Btbd1	0.0489457	0.051154	0.0480048	0.0551242	0.0500856	0.046686	0.0471124	0.0442825	0.040179	0.0450721	0.0472994	0.0432249	0.05	0.0445284	0.00547166	Up	0.00919	NC	No	No	Yes	No
Cd79a	0.0148227	0.0160443	0.0143608	0.010422	0.0181495	0.0194402	0.0100173	0.0100511	0.00858261	0.00627901	0.0130358	0.0124224	0.0155399	0.0100647	0.00547519	Up	4.3e-05	NC	No	Yes	No	No
Csnk2a1	0.0932578	0.0807656	0.0938345	0.0809056	0.0884071	0.100163	0.0875431	0.0817738	0.085029	0.0789873	0.0787938	0.0923327	0.0895555	0.0840766	0.0054789	Up	0.02426	NC	No	No	No	No
Stat5b	0.0661255	0.0554488	0.0617203	0.0665233	0.0770893	0.0693548	0.0629578	0.0486015	0.0620678	0.0550779	0.0765176	0.0581606	0.0660437	0.0605639	0.00547978	Up	0.048399	NC	No	No	No	No
Osbpl2	0.0525612	0.0586174	0.0637595	0.0650403	0.064567	0.0577799	0.0551277	0.0519766	0.0512579	0.063061	0.0579325	0.0498599	0.0603875	0.0548693	0.00551828	Up	0.048146	NC	No	No	No	No
Trib1	0.0502235	0.0548885	0.0566539	0.0483396	0.0650195	0.065087	0.0482024	0.045116	0.0534962	0.0487259	0.0580338	0.0535191	0.056702	0.0511822	0.00551976	Up	0.034216	NC	No	No	Yes	Yes
Kdm4c	0.0849814	0.0602101	0.0599015	0.0640467	0.0672941	0.076754	0.0790525	0.0532655	0.0551426	0.0646074	0.0605604	0.0673282	0.0688647	0.0633261	0.00553855	Up	0.009952	NC	No	No	No	No
Acbd6	0.037526	0.0391174	0.0366752	0.0332872	0.0329617	0.0342843	0.0304293	0.0280989	0.0299219	0.0271306	0.0315006	0.0335268	0.035642	0.0301014	0.00554059	Up	0.016697	NC	No	No	Yes	Yes
Slc35f1	0.0346601	0.0488853	0.0426893	0.0347453	0.0712553	0.0332091	0.0359305	0.039775	0.03385	0.0260396	0.065323	0.0311696	0.0442407	0.0386813	0.00555944	Up	0.024895	NC	No	No	Yes	No
Whsc1l1	0.0948125	0.0947765	0.0988177	0.0856609	0.104717	0.0990691	0.0900633	0.091406	0.0969208	0.0785403	0.0983823	0.0888833	0.0963089	0.0906993	0.00560959	Up	0.005483	NC	No	No	No	No
Cdk16	0.069747	0.0657917	0.0860801	0.0712311	0.0625874	0.0629196	0.0666404	0.0579812	0.0775607	0.0622418	0.0567289	0.0634116	0.0697261	0.0640941	0.00563206	Up	0.013528	Up	No	No	No	No
Gaa	0.0752492	0.076548	0.0756724	0.0678917	0.0728956	0.0796642	0.0712717	0.066187	0.069444	0.0623153	0.0634891	0.08139	0.0746535	0.0690162	0.00563735	Up	0.02434	NC	No	No	No	No
Zdhhc14	0.0340558	0.0349261	0.0339389	0.0303187	0.0321335	0.023272	0.0335253	0.0257994	0.0264236	0.0241567	0.0248907	0.0200126	0.0314408	0.0258014	0.00563948	Up	0.007319	NC	No	No	No	No
Atg13	0.0532627	0.0597419	0.0636123	0.0572545	0.0501111	0.044746	0.0465719	0.0531373	0.0615538	0.048097	0.0425037	0.0430086	0.0547881	0.0491454	0.0056427	Up	0.006168	NC	No	No	No	No
Mdh2	0.149711	0.129318	0.139659	0.152296	0.158626	0.161118	0.142573	0.127228	0.132343	0.146901	0.159494	0.148319	0.148455	0.14281	0.00564483	Up	0.032615	NC	No	No	Yes	No
Fam118a	0.0455431	0.0564959	0.0815483	0.0457536	0.0519764	0.0375724	0.0430489	0.0470396	0.0692268	0.03937	0.0503606	0.035944	0.0531483	0.0474983	0.00564997	Up	0.027949	NC	Yes	No	No	No
Wipf2	0.0578348	0.058639	0.0530555	0.0510635	0.0616883	0.0513413	0.0515443	0.049205	0.0492038	0.0484988	0.0548836	0.0462869	0.0556037	0.0499371	0.00566667	Up	0.002239	NC	No	No	No	No
Hmgcll1	0.0483465	0.0417832	0.0442071	0.0407814	0.0395836	0.0441672	0.0416197	0.0356132	0.0334516	0.0425985	0.0377364	0.0338231	0.0431448	0.0374737	0.00567108	Up	0.036314	NC	No	No	No	No
Pim2	0.0702906	0.0749417	0.0815386	0.063331	0.0698106	0.071429	0.0637609	0.0639862	0.0711021	0.0652731	0.0628194	0.0702655	0.0718903	0.0662012	0.00568905	Up	0.041846	NC	No	No	No	No
Tmem167b	0.0641719	0.0618343	0.0738643	0.0729003	0.0615919	0.0602166	0.0616968	0.0586139	0.0642403	0.0619295	0.05788	0.0559488	0.0657632	0.0600515	0.00571169	Up	0.011895	NC	No	No	No	No
Syvn1	0.0317247	0.0349012	0.0472988	0.0308821	0.0281952	0.0300603	0.0252968	0.0378364	0.034521	0.0227123	0.0247811	0.0235964	0.0338437	0.028124	0.0057197	Up	0.04405	NC	No	No	No	No
Ubxn4	0.156341	0.166839	0.178459	0.152628	0.15702	0.152091	0.150797	0.158242	0.181622	0.141023	0.147708	0.149662	0.160563	0.154843	0.00572061	Up	0.048431	NC	Yes	No	No	No
Fam222b	0.0466967	0.0385408	0.0495522	0.0403215	0.0515201	0.0430927	0.045057	0.0343942	0.0420276	0.0363286	0.0431627	0.0344197	0.044954	0.0392316	0.00572237	Up	0.004502	NC	No	Yes	No	No
Gnaz	0.0533131	0.064808	0.066796	0.0462639	0.0592469	0.0581315	0.0425306	0.0566677	0.0623337	0.0463481	0.0537644	0.0525092	0.0580932	0.052359	0.00573429	Up	0.012093	NC	Yes	No	Yes	No
Atl2	0.0330434	0.0467057	0.0349217	0.0368179	0.041579	0.0433693	0.0317989	0.0372386	0.0268384	0.0362896	0.0370451	0.0328131	0.0394062	0.0336706	0.00573555	Up	0.021816	NC	Yes	No	No	No
2310039H08Rik	0.0496427	0.0556252	0.0545992	0.0382618	0.0462009	0.0460991	0.0438973	0.0395969	0.0509377	0.0380015	0.0407209	0.0427531	0.0484048	0.0426512	0.0057536	Up	0.047779	NC	Yes	Yes	No	No
Nfil3	0.0287129	0.0404526	0.0438325	0.0298762	0.0244479	0.0280986	0.0248709	0.0342271	0.0378925	0.0221653	0.0205026	0.0212344	0.0325701	0.0268155	0.00575463	Up	0.000282	NC	Yes	No	Yes	No
Baiap3	0.0204555	0.02125	0.0231111	0.0249278	0.0216572	0.018751	0.014096	0.013371	0.0155388	0.0187302	0.0180948	0.0157883	0.0216921	0.0159365	0.00575557	Up	0.000991	NC	No	No	No	No
Bcap31	0.0736584	0.063215	0.0658506	0.0649428	0.0679052	0.0601339	0.0618513	0.0513106	0.0662581	0.0610209	0.0614431	0.0592323	0.065951	0.060186	0.00576496	Up	0.044327	NC	No	No	No	No
Tmed7	0.0400034	0.0697354	0.0457069	0.0437183	0.0643431	0.0588918	0.0358934	0.0553931	0.0404919	0.042404	0.0623231	0.0512882	0.0537332	0.0479656	0.00576756	Up	0.031485	NC	No	No	No	No
Fbxo33	0.0558163	0.0523942	0.0542483	0.0548695	0.049725	0.0642935	0.0497444	0.0463387	0.0463975	0.0498582	0.0528307	0.0515484	0.0552245	0.049453	0.00577151	Up	0.040496	NC	No	No	No	No
Dip2c	0.0725045	0.0693226	0.0577013	0.0703321	0.0595159	0.0516392	0.0684622	0.0588204	0.0472701	0.062401	0.0597401	0.0496654	0.0635026	0.0577265	0.00577604	Up	0.025936	NC	No	No	Yes	No
Inpp4b	0.0605353	0.0446944	0.0413108	0.0372712	0.0900587	0.0181508	0.0568158	0.0365983	0.0379235	0.0289532	0.0796892	0.0173742	0.0486702	0.0428924	0.00577785	Up	0.012109	NC	No	No	No	No
Snap47	0.071285	0.0738012	0.0886329	0.0774879	0.0820562	0.0836839	0.06942	0.0650895	0.078566	0.0728017	0.0741788	0.0821039	0.0794912	0.0736933	0.00579788	Up	0.011151	NC	No	Yes	No	No
Tmem234	0.0847311	0.0872842	0.0965776	0.0828287	0.0893931	0.0800431	0.0843723	0.0758358	0.0913939	0.0761545	0.0819527	0.0762868	0.0868096	0.0809993	0.00581028	Up	0.012412	NC	No	No	No	No
6430548M08Rik	0.0464781	0.0469075	0.0569534	0.0470266	0.0515787	0.0455796	0.0348724	0.0399185	0.048398	0.0391796	0.0510603	0.0461845	0.0490873	0.0432689	0.00581846	Up	0.031468	NC	No	No	No	No
Nfatc2	0.0294766	0.0326775	0.0315171	0.0244586	0.0257962	0.0283927	0.022628	0.0234139	0.0214452	0.0248309	0.022869	0.0222062	0.0287198	0.0228989	0.00582095	Up	0.01532	NC	Yes	No	No	No
Acbd3	0.0384048	0.0297765	0.0407271	0.0401332	0.0450766	0.0356643	0.030355	0.0309961	0.0384069	0.0325826	0.0335133	0.029	0.0382971	0.0324756	0.00582145	Up	0.02583	NC	No	No	No	No
Ept1	0.0286445	0.0275022	0.0278688	0.0326324	0.0271435	0.0223518	0.0238896	0.0224525	0.023627	0.0222502	0.0222349	0.0166671	0.0276906	0.0218535	0.005837	Up	0.001499	NC	No	No	No	No
Spag9	0.0696446	0.0686767	0.0649185	0.0611706	0.0808041	0.0780718	0.0576922	0.0657062	0.06224	0.0533654	0.0803499	0.0688895	0.0705477	0.0647072	0.00584053	Up	0.023866	NC	Yes	No	Yes	No
Prkaca	0.0955867	0.109779	0.103003	0.0994662	0.109831	0.115982	0.0897182	0.102534	0.104447	0.0908517	0.104026	0.106997	0.105608	0.0997625	0.0058455	Up	0.013195	NC	No	No	No	No
Mblac2	0.034041	0.0331073	0.0262667	0.0314159	0.0461995	0.0336763	0.0296441	0.0228836	0.0200015	0.0275475	0.0357339	0.0337621	0.0341178	0.0282621	0.00585566	Up	0.016482	NC	No	No	No	No
Fuom	0.0521047	0.0437665	0.0502246	0.0525463	0.0454949	0.0522633	0.0486264	0.0353075	0.0490978	0.0401757	0.0411878	0.0468702	0.0494	0.0435442	0.00585582	Up	0.015714	NC	No	No	No	Yes
Adk	0.0922258	0.0969509	0.0895909	0.0826525	0.0967547	0.0880495	0.0897731	0.0862318	0.0869606	0.0724178	0.0875775	0.0881182	0.0910374	0.0851798	0.00585756	Up	0.02855	NC	Yes	Yes	No	No
Prox1	0.0478632	0.0570946	0.0418868	0.0568084	0.0633155	0.0589667	0.0390203	0.0504942	0.0400191	0.0520569	0.0539631	0.0551677	0.0543225	0.0484536	0.00586897	Up	0.004478	NC	Yes	Yes	No	No
Psmd3	0.0563744	0.0573345	0.0665247	0.0556478	0.0511491	0.0572967	0.0504365	0.0466076	0.05694	0.0521439	0.0460936	0.0568755	0.0573879	0.0515162	0.00587168	Up	0.013218	NC	No	No	No	No
Bcr	0.0515022	0.0531966	0.0500566	0.0479432	0.0485367	0.0536841	0.0421597	0.0443249	0.0525721	0.0457862	0.0409849	0.0438077	0.0508199	0.0449392	0.00588066	Up	0.034104	NC	No	No	No	No
1810043H04Rik	0.0445299	0.0422651	0.0463955	0.038557	0.0389741	0.0491444	0.0354827	0.031889	0.0373034	0.0326793	0.0366956	0.0504931	0.043311	0.0374239	0.00588715	Up	0.025814	NC	No	No	No	No
Rbfox2	0.0645112	0.0602845	0.0541575	0.0544222	0.067216	0.0574749	0.0609351	0.0490027	0.0499341	0.0511415	0.0591758	0.0525541	0.0596777	0.0537905	0.00588718	Up	0.005948	NC	Yes	Yes	No	No
Trappc6b	0.0832249	0.0771876	0.0704587	0.0763033	0.0890456	0.0826941	0.0719035	0.0730309	0.0712604	0.0723034	0.0828864	0.0721733	0.079819	0.0739263	0.00589272	Up	0.024259	NC	No	No	No	No
Pla2g6	0.0501432	0.0423886	0.0577	0.046227	0.0426626	0.053818	0.0426061	0.0402163	0.045776	0.0441599	0.0397856	0.0450288	0.0488232	0.0429288	0.00589445	Up	0.017264	Up	No	No	No	No
Srp72	0.105584	0.146211	0.134635	0.108882	0.139632	0.118849	0.0932965	0.14172	0.133236	0.0953887	0.13739	0.117354	0.125632	0.119731	0.0059013	Up	0.047726	NC	No	No	No	No
Tmem246	0.0227846	0.0243647	0.0311712	0.0291591	0.0276403	0.0231636	0.0208357	0.020553	0.0209376	0.0183247	0.0210825	0.0211363	0.0263806	0.0204783	0.00590228	Up	0.014772	NC	No	No	Yes	No
Ddx47	0.0404655	0.0419627	0.0421629	0.0399641	0.0416501	0.0422465	0.0355529	0.0375891	0.0296586	0.0336751	0.0389586	0.0375453	0.0414086	0.0354966	0.00591202	Up	0.008307	NC	No	Yes	No	No
Cct5	0.115621	0.107516	0.116	0.112574	0.0812661	0.0902082	0.106188	0.0973232	0.113851	0.114183	0.0778412	0.078229	0.103864	0.097936	0.00592839	Up	0.042694	NC	No	Yes	No	No
Smpd1	0.0606512	0.0651878	0.0731576	0.0632665	0.0588694	0.0599977	0.0552459	0.0571621	0.0592099	0.0663038	0.0514069	0.0562013	0.0635217	0.0575883	0.00593339	Up	0.048272	NC	No	No	No	No
Asap1	0.0514168	0.0439105	0.0392006	0.043934	0.0484586	0.0488113	0.0413944	0.0296362	0.0384263	0.0381386	0.0469468	0.0455238	0.0459553	0.040011	0.00594428	Up	0.039985	NC	No	Yes	No	No
Rabgef1	0.0877169	0.0650877	0.0787867	0.0733318	0.0823158	0.0833558	0.0744375	0.067158	0.0754652	0.0676887	0.0765741	0.0734599	0.0784324	0.0724639	0.00596852	Up	0.039996	NC	No	No	No	No
Agpat3	0.115056	0.0940786	0.101061	0.114134	0.109376	0.10708	0.10822	0.0844525	0.0991695	0.109179	0.104269	0.0996745	0.106797	0.100828	0.00596971	Up	0.002588	NC	No	No	No	Yes
Idh3g	0.0688398	0.0673748	0.0716393	0.0795451	0.0762474	0.0675	0.0629934	0.055568	0.0705815	0.0706971	0.0679647	0.0674917	0.0718578	0.0658827	0.00597504	Up	0.025156	NC	No	No	No	No
Rab24	0.0771974	0.0597242	0.0760971	0.0673488	0.0680405	0.0714329	0.0689563	0.0528476	0.0643731	0.062033	0.0710423	0.0646389	0.0699735	0.0639819	0.00599165	Up	0.030535	NC	No	No	No	No
Nbl1	0.0173073	0.0099998	0.0201681	0.0214407	0.0150045	0.0194693	0.0110538	0.00931586	0.00728921	0.0148332	0.00938954	0.0155128	0.0172316	0.0112324	0.00599922	Up	0.014505	NC	No	No	Yes	No
Cspp1	0.097824	0.0788902	0.084764	0.0864628	0.0979042	0.0940532	0.0963102	0.0724589	0.0785949	0.0881421	0.0874608	0.0808934	0.0899831	0.0839767	0.00600635	Up	0.043646	NC	No	No	No	No
Gramd4	0.0377148	0.0385862	0.0411029	0.0408654	0.0385084	0.0364682	0.0362485	0.0264222	0.0315936	0.0332245	0.0351721	0.0344965	0.0388743	0.0328596	0.00601472	Up	0.0204	NC	No	No	No	No
Xrn1	0.0362858	0.0430726	0.0403193	0.0413992	0.0491433	0.0449884	0.0365262	0.034316	0.0336365	0.0348204	0.0393775	0.040434	0.0425348	0.0365184	0.00601632	Up	0.00907	NC	No	No	No	No
Capsl	0.0433485	0.0538365	0.0493091	0.0333943	0.0374962	0.0327221	0.034126	0.0509104	0.0421834	0.0278735	0.0339011	0.0250047	0.0416844	0.0356665	0.00601794	Up	0.001829	NC	No	No	No	No
Akt3	0.0617348	0.0682369	0.0630079	0.0530931	0.0734709	0.0756322	0.0566928	0.0542259	0.0589828	0.0518699	0.0718687	0.0653849	0.0658626	0.0598375	0.00602514	Up	0.033658	NC	No	No	No	Yes
Tef	0.0277711	0.0247788	0.0268681	0.0416599	0.0435019	0.0347869	0.0270398	0.0168306	0.0216218	0.030094	0.0422313	0.0253935	0.0332278	0.0272018	0.00602594	Up	0.020295	NC	No	No	No	No
Prmt1	0.0665444	0.0700735	0.0824127	0.0763633	0.0879063	0.0806714	0.0673043	0.0673749	0.0774155	0.0699836	0.0731274	0.0725471	0.0773286	0.0712921	0.00603645	Up	0.037946	NC	No	No	No	No
Dpp9	0.124652	0.115449	0.125481	0.12574	0.131263	0.130236	0.116504	0.107076	0.121328	0.116866	0.12073	0.134053	0.12547	0.119426	0.00604406	Up	0.037565	Up	No	No	No	No
Rusc1	0.0529888	0.0579352	0.066292	0.0475678	0.0650545	0.0672614	0.0438149	0.0494758	0.0592878	0.0489567	0.0607089	0.0584284	0.0595166	0.0534454	0.00607121	Up	0.014567	NC	No	No	No	No
Emilin1	0.0381295	0.0362122	0.0528453	0.0315758	0.0358469	0.0484099	0.0345701	0.0283256	0.0534742	0.0293323	0.0234726	0.0372825	0.0405033	0.0344096	0.0060937	Up	0.034644	NC	No	No	No	No
Appbp2	0.0617296	0.0706101	0.0560858	0.0661999	0.0660887	0.0629632	0.0521141	0.0669777	0.0565858	0.0594172	0.0596675	0.0522011	0.0639462	0.0578273	0.00611896	Up	0.014749	NC	Yes	No	No	No
Bag3	0.0568777	0.0363109	0.044483	0.0380222	0.05334	0.055866	0.0556764	0.029773	0.0410598	0.0350866	0.0406838	0.0458878	0.0474833	0.0413612	0.00612207	Up	0.02003	NC	Yes	No	No	No
Dlg4	0.0571545	0.0512546	0.0580393	0.0563023	0.045938	0.0518387	0.056907	0.0450068	0.0451947	0.046393	0.0471416	0.0431333	0.0534212	0.0472961	0.00612517	Up	0.042793	Up	Yes	No	No	No
Kctd8	0.0343634	0.041318	0.0277628	0.0287924	0.0432268	0.0286204	0.0250628	0.0292424	0.0206653	0.0242785	0.0429585	0.0251211	0.034014	0.0278881	0.00612587	Up	0.016697	Up	Yes	No	No	No
Snx24	0.0474735	0.0529609	0.0509538	0.0471718	0.0499321	0.0388303	0.0452632	0.0389503	0.0398361	0.0441219	0.0458691	0.0365042	0.0478871	0.0417575	0.0061296	Up	0.032326	NC	Yes	No	No	No
Mcf2l	0.054834	0.0624757	0.0609192	0.0629108	0.0640813	0.0595619	0.0539288	0.0587503	0.047628	0.0527856	0.0587191	0.0561721	0.0607972	0.054664	0.00613319	Up	0.023303	Up	No	No	No	No
Smarca2	0.0728444	0.0682575	0.061636	0.0685767	0.0843707	0.0796769	0.069392	0.0687772	0.0531597	0.0632027	0.0803773	0.0635931	0.0725603	0.066417	0.00614333	Up	0.045375	NC	Yes	Yes	No	No
Paip2	0.156893	0.166641	0.147143	0.155948	0.17307	0.163005	0.148268	0.157176	0.144145	0.149272	0.169246	0.157726	0.16045	0.154306	0.00614438	Up	0.002123	NC	No	No	No	No
Mns1	0.0455478	0.0421126	0.0520478	0.0553992	0.0405859	0.0361981	0.0409034	0.0323608	0.0475562	0.0470122	0.0356799	0.0314413	0.0453152	0.039159	0.00615625	Up	0.00124	NC	No	No	No	No
Filip1	0.0669035	0.0574356	0.0606591	0.0535366	0.0636016	0.0689371	0.0553425	0.0494798	0.0486278	0.0518084	0.0658939	0.0629832	0.0618456	0.0556893	0.00615632	Up	0.04367	NC	Yes	Yes	No	No
Tsen34	0.0620325	0.0591746	0.0711579	0.0646165	0.0772479	0.0662384	0.0638327	0.0512387	0.0647253	0.0569015	0.0663065	0.0604771	0.0667447	0.0605803	0.00616437	Up	0.016927	NC	No	No	No	No
Gde1	0.175695	0.145917	0.198058	0.178886	0.195622	0.195026	0.165968	0.145846	0.193328	0.176012	0.186212	0.184709	0.181534	0.175346	0.00618791	Up	0.016159	NC	No	No	No	No
Atp5k	0.0891552	0.0890065	0.0808796	0.0886385	0.0658472	0.0846447	0.0884428	0.0776543	0.0795009	0.0768301	0.0590173	0.0795445	0.0830286	0.0768316	0.00619698	Up	0.024168	NC	No	No	No	No
Mbnl1	0.127579	0.14906	0.152616	0.0917995	0.122708	0.10343	0.1168	0.142702	0.141983	0.0870293	0.118115	0.103353	0.124532	0.11833	0.00620184	Up	0.013518	NC	No	Yes	No	No
Dlst	0.0663635	0.0616458	0.075411	0.0634949	0.0659498	0.063936	0.0591302	0.0540932	0.0641557	0.0542011	0.0663058	0.0614768	0.0661335	0.0598938	0.00623974	Up	0.017163	NC	No	No	Yes	No
Tceb1	0.0654434	0.073929	0.0674903	0.0680529	0.0799336	0.0857885	0.0598321	0.0667045	0.0640085	0.0659532	0.0743939	0.072288	0.0734396	0.0671967	0.0062429	Up	0.012132	NC	No	No	No	No
Cntn5	0.069769	0.0887591	0.0171801	0.0178671	0.0857592	0.0245009	0.0615922	0.0754905	0.0170492	0.0176846	0.0737853	0.0207726	0.0506392	0.0443957	0.00624348	Up	0.045357	NC	No	No	No	Yes
Efna5	0.0478298	0.0406664	0.0487654	0.0429389	0.0500121	0.0428478	0.0449439	0.0306907	0.0345819	0.0379384	0.0455175	0.0419263	0.0455101	0.0392665	0.00624362	Up	0.026646	NC	Yes	Yes	No	No
Pdxdc1	0.0765612	0.0771586	0.0937168	0.0773737	0.0756721	0.0790041	0.0761249	0.0702771	0.0887832	0.0660409	0.0673137	0.0731592	0.0799144	0.0736165	0.00629792	Up	0.008213	NC	No	No	No	No
Psd	0.030331	0.0211305	0.0305498	0.0285546	0.022188	0.023498	0.023364	0.0179268	0.0178274	0.0239547	0.0158261	0.0194324	0.026042	0.0197219	0.00632009	Up	0.006397	NC	Yes	No	No	No
Meis1	0.119105	0.0473508	0.0407467	0.0377363	0.0523624	0.0399451	0.114361	0.0377944	0.0364575	0.0295281	0.0427349	0.0383212	0.0562078	0.0498662	0.00634162	Up	0.005138	NC	Yes	No	Yes	Yes
Gga2	0.0773842	0.0795712	0.0747323	0.0817304	0.0894191	0.0899203	0.0660956	0.0687325	0.072891	0.0814722	0.0841256	0.081314	0.0821262	0.0757718	0.00635444	Up	0.020416	NC	No	No	No	Yes
Prkag1	0.0451134	0.0477841	0.0534389	0.0486417	0.0480507	0.0457013	0.0423877	0.0383512	0.0462346	0.0384689	0.0410615	0.0439998	0.0481217	0.0417506	0.00637104	Up	0.006373	NC	No	No	No	No
Ndufb3	0.101979	0.106646	0.0997603	0.0947113	0.0935591	0.0998792	0.0989259	0.092796	0.0916845	0.0883895	0.0935239	0.0929537	0.0994226	0.0930456	0.00637698	Up	0.02088	NC	No	No	No	No
Pkp4	0.109038	0.0963388	0.0939796	0.108434	0.123712	0.114452	0.103517	0.0961175	0.0856551	0.100982	0.120487	0.100905	0.107659	0.101277	0.00638171	Up	0.018992	NC	No	No	No	No
Map7	0.0697083	0.0644435	0.0683564	0.077396	0.0756514	0.071655	0.0634853	0.0559902	0.0682544	0.0619168	0.0752325	0.0638097	0.0712018	0.0647815	0.00642027	Up	0.040593	NC	No	Yes	No	No
Ndufv1	0.0518854	0.0532614	0.0592684	0.0592714	0.0488141	0.0505026	0.0509495	0.0455164	0.0538435	0.052259	0.0395372	0.04231	0.0538339	0.0474026	0.00643128	Up	0.00324	NC	Yes	No	No	No
Gsk3a	0.0635164	0.058764	0.0689975	0.0588721	0.0569545	0.066837	0.058172	0.0511091	0.0681241	0.0557939	0.0490922	0.0530516	0.0623236	0.0558905	0.00643311	Up	0.017151	NC	No	No	No	No
Arfip2	0.0500562	0.0519102	0.0688204	0.0522853	0.0518605	0.0482501	0.0443036	0.0426732	0.0659262	0.0477914	0.0400652	0.0437991	0.0538638	0.0474264	0.00643733	Up	0.005543	NC	No	No	Yes	No
Fgd2	0.0300562	0.0295049	0.0349561	0.0438312	0.022219	0.0182181	0.0270877	0.0240974	0.0269187	0.0295982	0.0178708	0.014571	0.0297976	0.0233573	0.00644031	Up	0.013322	NC	No	No	No	No
Gap43	0.017877	0.0169326	0.0182832	0.0182132	0.00835698	0.00683604	0.0135376	0.0117743	0.00551186	0.00849513	0.00392771	0.00437382	0.0144165	0.00793674	0.00647977	Up	0.009812	NC	No	Yes	No	No
Sik2	0.0275501	0.0292311	0.0278297	0.029374	0.0278936	0.0298446	0.022895	0.0168724	0.0207479	0.0195354	0.0262769	0.0264932	0.0286205	0.0221368	0.00648372	Up	0.011422	Up	No	No	No	No
Taf6l	0.0608479	0.0522572	0.0642153	0.0598816	0.0597632	0.0605984	0.0563028	0.0476523	0.0622074	0.050371	0.0497281	0.0523738	0.059594	0.0531059	0.00648804	Up	0.00439	NC	No	No	No	No
Mafg	0.115213	0.0833458	0.0941092	0.108221	0.106115	0.0880655	0.111221	0.0828506	0.091912	0.0941088	0.0966322	0.0793991	0.0991782	0.0926873	0.00649096	Up	0.027167	NC	No	No	No	No
Unc119b	0.0351014	0.0398661	0.0406877	0.0394018	0.0388759	0.0320907	0.0296365	0.0261561	0.0340787	0.0296671	0.0381654	0.0293642	0.0376706	0.031178	0.00649258	Up	0.019866	NC	No	No	No	No
Rchy1	0.117415	0.109884	0.116802	0.118207	0.105846	0.115969	0.118568	0.0943364	0.113125	0.111238	0.0969324	0.11093	0.11402	0.107522	0.00649868	Up	0.036049	NC	Yes	No	No	No
Ppp1r12a	0.0659807	0.0525015	0.0536056	0.0633756	0.0749695	0.0636071	0.0563796	0.0549431	0.0403087	0.055004	0.0680439	0.060294	0.06234	0.0558289	0.00651109	Up	0.033176	NC	Yes	No	Yes	No
Dnajb2	0.0419636	0.0492725	0.056679	0.0503651	0.046121	0.0413974	0.0357995	0.0375128	0.0475655	0.0436773	0.0437039	0.0382987	0.0476331	0.0410929	0.00654018	Up	0.006296	NC	No	No	No	No
Prdx5	0.101769	0.0915439	0.105132	0.109316	0.110083	0.112989	0.0985563	0.0900279	0.101111	0.103363	0.102079	0.0964389	0.105139	0.098596	0.00654276	Up	0.031065	NC	No	No	No	No
Upf3b	0.102096	0.0820662	0.0868267	0.112176	0.112884	0.10912	0.100426	0.0831028	0.0787687	0.102927	0.105469	0.0949836	0.100861	0.0942796	0.0065818	Up	0.031844	NC	No	No	No	No
Bambi	0.0582486	0.0450723	0.0527852	0.0628048	0.0467295	0.0400552	0.0442475	0.0414007	0.0445629	0.052719	0.0449126	0.0383478	0.0509493	0.0443651	0.00658422	Up	0.02331	NC	No	Yes	No	No
Pkd2	0.0456414	0.0633497	0.0772963	0.0762913	0.0586756	0.0560554	0.0482146	0.0537621	0.0669955	0.0632909	0.0543307	0.0511409	0.062885	0.0562891	0.00659582	Up	0.033972	NC	No	No	No	No
Gck	0.0805658	0.0845166	0.0850294	0.0845297	0.0762659	0.0845281	0.0733687	0.0688777	0.081958	0.0746924	0.0757259	0.0811377	0.0825726	0.0759601	0.00661251	Up	0.032353	Up	No	Yes	No	Yes
Vwa5b2	0.0679136	0.0631061	0.0600802	0.0656519	0.072273	0.0498922	0.0634783	0.0580633	0.0495692	0.0539349	0.0703352	0.0438359	0.0631528	0.0565361	0.00661673	Up	0.007622	NC	No	No	No	No
Fkbp4	0.171041	0.143558	0.155417	0.146709	0.142172	0.137115	0.168773	0.135514	0.14303	0.13902	0.135069	0.134899	0.149335	0.142717	0.0066179	Up	0.008609	NC	No	No	No	No
Smek2	0.0547752	0.0662072	0.0509627	0.0564944	0.0643969	0.0496611	0.0570135	0.0534921	0.0422759	0.0514747	0.0528174	0.0457054	0.0570829	0.0504632	0.00661976	Up	0.033008	NC	No	No	No	No
AU040320	0.0717719	0.0772616	0.0769061	0.0727982	0.0766426	0.0727561	0.0706817	0.0610302	0.0695018	0.0672859	0.0684534	0.0714237	0.0746894	0.0680628	0.00662664	Up	0.03328	NC	No	No	No	No
Ptov1	0.0993457	0.0979704	0.115964	0.111046	0.0863722	0.104114	0.093343	0.0990284	0.110711	0.0938934	0.0806522	0.0974087	0.102469	0.0958394	0.00662928	Up	0.039791	NC	No	No	Yes	No
Rnf185	0.0396166	0.0402022	0.0505099	0.0440244	0.0491572	0.0501576	0.0373099	0.0285536	0.045606	0.0325291	0.0438116	0.0460578	0.0456113	0.038978	0.00663332	Up	0.009366	NC	No	Yes	No	No
Atp5j2	0.133359	0.108578	0.123619	0.120501	0.108668	0.125547	0.13583	0.101454	0.120515	0.1099	0.0996449	0.113101	0.120045	0.113408	0.0066377	Up	0.031505	Down	No	No	No	No
Ovol2	0.0362873	0.0503734	0.0625089	0.0335103	0.0428937	0.0877757	0.0344316	0.0405026	0.0614709	0.026607	0.0312587	0.0792155	0.0522249	0.045581	0.00664386	Up	0.013092	NC	No	No	No	No
Nfic	0.0565231	0.0629892	0.0734987	0.047907	0.0696027	0.0696024	0.0491233	0.0580749	0.0692786	0.0439316	0.0548217	0.0649358	0.0633539	0.0566943	0.00665954	Up	0.011209	NC	Yes	No	No	No
Pip5k1a	0.0533739	0.0503214	0.0581085	0.0512146	0.0678977	0.0600143	0.0456152	0.0485056	0.055718	0.0407393	0.0545562	0.0557616	0.0568217	0.0501493	0.00667243	Up	0.016953	NC	No	No	No	No
Gabarapl1	0.181937	0.169823	0.183101	0.183887	0.209179	0.212581	0.175589	0.166264	0.177993	0.17857	0.205486	0.19652	0.190085	0.183404	0.00668092	Up	0.017818	Up	No	No	No	No
Wipi2	0.0679165	0.0709798	0.0677253	0.069649	0.0536115	0.0616008	0.058478	0.0575663	0.062984	0.0605371	0.0476221	0.0641957	0.0652471	0.0585639	0.00668327	Up	0.030186	NC	No	No	No	No
Ascc1	0.0483234	0.0407272	0.0464239	0.0466315	0.0456706	0.0544421	0.043792	0.0405174	0.036904	0.0342502	0.0411004	0.0453547	0.0470364	0.0403198	0.00671666	Up	0.013572	NC	No	No	No	No
Stag1	0.0740043	0.0725326	0.0708661	0.069521	0.0741929	0.0631799	0.0659163	0.0661216	0.0559313	0.0592052	0.0698767	0.0668844	0.0707161	0.0639893	0.00672688	Up	0.046741	NC	No	No	No	No
Pde4dip	0.121175	0.110511	0.111395	0.121436	0.127515	0.106117	0.113254	0.101143	0.109934	0.116402	0.115227	0.101757	0.116358	0.10962	0.00673851	Up	0.008114	NC	No	No	No	No
Cbx5	0.0821508	0.0757112	0.08303	0.0789546	0.0797116	0.0833569	0.0818042	0.0667499	0.0759151	0.0743086	0.0780361	0.0656155	0.0804859	0.0737382	0.00674762	Up	0.046358	Down	No	No	Yes	No
Tmem181a	0.081413	0.0666725	0.0691228	0.0711762	0.080226	0.0657773	0.0750202	0.0659755	0.0548103	0.063637	0.0800097	0.0544409	0.072398	0.0656489	0.00674903	Up	0.032341	NC	No	Yes	Yes	No
Acat1	0.0905161	0.0809612	0.0826183	0.0943623	0.101374	0.103933	0.0880837	0.0662772	0.0834506	0.0873272	0.0966768	0.0913729	0.0922942	0.0855314	0.00676277	Up	0.038768	NC	No	No	No	No
Mfap1b	0.0483221	0.0485362	0.0483785	0.0416334	0.0520127	0.0541528	0.0390289	0.0366245	0.037954	0.0427804	0.0464771	0.0495735	0.0488393	0.0420731	0.00676621	Up	0.018169	Down	No	No	No	No
Rabggtb	0.061436	0.0597047	0.0629726	0.0742111	0.06149	0.0559937	0.0585436	0.0490535	0.0571367	0.0630394	0.049276	0.0581581	0.0626347	0.0558679	0.00676678	Up	0.03256	NC	No	No	No	No
Maged2	0.0597191	0.0679022	0.0745188	0.060477	0.0615828	0.0543576	0.0556072	0.0591769	0.0682363	0.0517007	0.048602	0.0545768	0.0630929	0.0563166	0.00677628	Up	0.014523	NC	No	Yes	No	No
Efnb3	0.0137519	0.0154925	0.0170214	0.0117208	0.00735319	0.00743399	0.00772606	0.00537734	0.00429532	0.00712574	0.00529931	0.00227065	0.012129	0.00534907	0.0067799	Up	0.008183	Up	No	No	Yes	No
Spint1	0.0484909	0.0484543	0.0535705	0.0573975	0.0598788	0.0680848	0.0477341	0.0397925	0.0507823	0.044501	0.0549068	0.0573195	0.0559795	0.0491727	0.0068068	Up	0.016958	Up	Yes	No	No	No
Fbxo8	0.040843	0.040859	0.0394038	0.0392234	0.0417579	0.0426913	0.03103	0.0358288	0.0293665	0.0262466	0.0423271	0.0391374	0.0407964	0.0339894	0.00680701	Up	0.020876	NC	No	No	Yes	No
Ccnl2	0.0838342	0.0745651	0.0817753	0.0957466	0.0809553	0.078095	0.0764277	0.0728919	0.0730224	0.0925101	0.0738783	0.0653945	0.0824952	0.0756875	0.00680777	Up	0.008325	NC	No	No	No	No
Sgpp1	0.0773461	0.068079	0.0696451	0.0795742	0.0663025	0.071609	0.069371	0.0581901	0.058514	0.0668278	0.0657615	0.0729672	0.0720927	0.0652719	0.00682071	Up	0.035446	NC	No	No	No	No
Grb2	0.172188	0.173091	0.174123	0.162894	0.171037	0.171224	0.167919	0.171085	0.168925	0.16134	0.160047	0.154262	0.17076	0.16393	0.00682982	Up	0.038627	NC	Yes	No	No	No
Cxxc5	0.0818338	0.0913668	0.0944978	0.0721251	0.0845338	0.0836891	0.0737107	0.0794935	0.0925404	0.070609	0.0717465	0.0789323	0.0846744	0.0778387	0.00683568	Up	0.018554	NC	Yes	Yes	No	No
Fam135a	0.0777164	0.0786951	0.069689	0.073358	0.0785677	0.0821225	0.065011	0.0704574	0.0731727	0.0640837	0.0765877	0.0697756	0.0766914	0.069848	0.0068434	Up	0.046421	NC	Yes	No	No	No
Ube2j1	0.0906745	0.0880894	0.0946988	0.0902825	0.101943	0.0999183	0.0884258	0.0750469	0.0846528	0.0871243	0.0926481	0.0966433	0.0942678	0.0874235	0.00684423	Up	0.013859	NC	No	No	No	No
Dcun1d3	0.0391715	0.0421909	0.0463985	0.0331115	0.0488634	0.0499475	0.0293192	0.0307748	0.0409494	0.0362068	0.0395062	0.0417992	0.0432805	0.0364259	0.00685461	Up	0.024327	NC	No	No	No	No
Ddit4	0.110315	0.110428	0.122372	0.12173	0.118768	0.105899	0.107138	0.100507	0.113659	0.115135	0.109047	0.102804	0.114919	0.108048	0.00687037	Up	0.002974	NC	No	No	No	No
Stxbp5l	0.0228651	0.0233867	0.0232183	0.0200694	0.0329217	0.0403223	0.0174503	0.0151452	0.0113885	0.0137109	0.0284671	0.0353845	0.0271306	0.0202577	0.00687285	Up	0.00175	Up	No	No	No	No
Dph6	0.0509767	0.0513427	0.044163	0.0502087	0.0501736	0.0458342	0.0464345	0.0374155	0.0415154	0.0415827	0.0417415	0.0426704	0.0487832	0.0418933	0.00688983	Up	0.011095	NC	Yes	No	No	Yes
Sfi1	0.0514297	0.0576064	0.057869	0.0475044	0.0533586	0.0498255	0.0467247	0.0493154	0.0540339	0.0377675	0.0467544	0.0416349	0.0529323	0.0460385	0.0068938	Up	0.000703	NC	No	No	No	No
Snhg18	0.0250195	0.0380021	0.0339724	0.0181419	0.0187165	0.0157618	0.0155127	0.0238845	0.0253944	0.013359	0.0141535	0.0159155	0.0249357	0.0180366	0.00689909	Up	0.018641	NC	No	No	No	No
Ccdc117	0.0720981	0.0435733	0.0510028	0.0580182	0.0535342	0.0477228	0.0628508	0.0390795	0.0402344	0.0554246	0.0526887	0.0341313	0.0543249	0.0474016	0.00692333	Up	0.01979	NC	No	No	Yes	No
Myt1l	0.100289	0.0858063	0.0941977	0.0834134	0.130498	0.104834	0.0958985	0.0826351	0.0842479	0.0804444	0.113579	0.100538	0.0998397	0.0928905	0.00694922	Up	0.027274	NC	Yes	Yes	Yes	No
Amz2	0.0506628	0.0448994	0.0464708	0.0551104	0.0492178	0.0520664	0.0437518	0.0418018	0.0371127	0.0455407	0.044027	0.0444364	0.0497379	0.0427784	0.00695951	Up	0.00102	Up	No	No	No	No
Trnp1	0.0232851	0.0284895	0.0270421	0.0303639	0.0372865	0.0383696	0.0187444	0.0226356	0.0163683	0.0220351	0.0309841	0.0322164	0.0308061	0.0238307	0.00697547	Up	0.000546	Up	No	No	No	No
Deb1	0.0760989	0.0938588	0.0975052	0.0838789	0.0875053	0.0872858	0.0614438	0.0916017	0.0970449	0.0796182	0.078971	0.0755452	0.0876888	0.0807041	0.0069847	Up	0.028069	NC	No	No	No	No
Tox	0.0512892	0.0408749	0.0442695	0.0426521	0.0455087	0.0332948	0.0393249	0.0330021	0.033121	0.0435082	0.0420056	0.0250032	0.0429815	0.0359942	0.00698735	Up	0.016922	NC	Yes	No	Yes	No
Eif1a	0.0379062	0.0429817	0.0463014	0.0458166	0.046754	0.0500572	0.0320509	0.0372341	0.0398089	0.0368275	0.0408965	0.0410184	0.0449695	0.0379727	0.00699681	Up	0.000117	NC	No	No	No	No
Ttc39a	0.0432403	0.0521643	0.0534687	0.0505156	0.0520555	0.0538903	0.0335394	0.0413931	0.0513911	0.0425359	0.0448625	0.0495758	0.0508891	0.043883	0.00700615	Up	0.003398	NC	No	No	No	No
Sept2	0.104725	0.108959	0.111947	0.12202	0.114052	0.111464	0.100955	0.106176	0.106039	0.110292	0.110171	0.0974698	0.112195	0.105184	0.00701084	Up	0.01468	NC	No	No	No	No
Fam20c	0.0714084	0.0745704	0.0809485	0.0688154	0.051262	0.0617313	0.0570779	0.0659996	0.070652	0.0657083	0.05171	0.0552999	0.0681227	0.0610746	0.00704803	Up	0.021809	Up	No	No	No	No
Fam120aos	0.0482828	0.0559031	0.04962	0.0464556	0.0531071	0.0525973	0.043172	0.0476698	0.04244	0.0399916	0.0472762	0.0430797	0.0509943	0.0439382	0.00705611	Up	0.000125	NC	No	No	No	No
Krt7	0.124982	0.115313	0.14343	0.125753	0.117568	0.133819	0.107775	0.107812	0.134759	0.121027	0.112475	0.134647	0.126811	0.119749	0.00706151	Up	0.033599	NC	No	No	No	No
Gm26663	0.0973269	0.102985	0.0945005	0.0969307	0.110161	0.100555	0.0893006	0.0966864	0.09418	0.0803295	0.103802	0.095791	0.10041	0.0933482	0.00706154	Up	0.023304	NC	No	No	No	No
Derl2	0.117402	0.120361	0.131742	0.11204	0.129233	0.108675	0.10955	0.110291	0.131505	0.105577	0.115953	0.104194	0.119909	0.112845	0.00706376	Up	0.012222	NC	No	No	No	No
Cdk4	0.0954902	0.0955494	0.100192	0.104123	0.112011	0.113622	0.0898667	0.0870964	0.0983782	0.0972614	0.100558	0.105431	0.103498	0.0964319	0.00706592	Up	0.00304	NC	No	Yes	No	No
Eif5b	0.0597756	0.0659612	0.0601079	0.0495396	0.0624385	0.0629574	0.0505337	0.0536512	0.0511338	0.0415184	0.0622342	0.0593007	0.06013	0.053062	0.00706801	Up	0.010724	NC	No	Yes	No	Yes
Pgk1-rs7	0.101491	0.101613	0.115082	0.0988954	0.101606	0.100008	0.0959832	0.0893956	0.112261	0.0983148	0.0948751	0.0854237	0.103116	0.0960423	0.00707358	Up	0.023731	NC	No	No	No	No
Otud7a	0.0605334	0.0740582	0.0807932	0.0501967	0.0549476	0.0556652	0.0517461	0.071172	0.0633658	0.0479269	0.0519509	0.0475821	0.062699	0.055624	0.00707505	Up	0.030574	NC	Yes	No	Yes	No
Selm	0.130235	0.149901	0.172699	0.129529	0.0867236	0.134511	0.121896	0.139932	0.168152	0.127348	0.0823031	0.12145	0.133933	0.126847	0.00708619	Up	0.00805	NC	No	No	No	No
Smad1	0.0465717	0.05431	0.0448494	0.0464302	0.0599433	0.0507209	0.0421495	0.0417985	0.0414162	0.042086	0.0484415	0.0443955	0.0504709	0.0433812	0.00708969	Up	0.006942	Up	No	No	No	No
Cisd1	0.112976	0.109252	0.115411	0.11477	0.120658	0.118756	0.113757	0.0954	0.104294	0.107909	0.118177	0.109706	0.115304	0.108207	0.00709656	Up	0.024428	NC	No	No	No	No
Ppp6r3	0.0778188	0.0662625	0.0642663	0.0725608	0.0825266	0.0745001	0.078304	0.0545721	0.057288	0.0690729	0.0687175	0.0672375	0.0729892	0.0658653	0.00712385	Up	0.020617	NC	No	No	No	No
Cpn1	0.0506179	0.0448142	0.0551544	0.0544496	0.0515254	0.0522167	0.0463832	0.0350232	0.04917	0.0474468	0.0433926	0.0446027	0.051463	0.0443364	0.00712661	Up	0.000256	Up	No	No	No	No
Pitpnb	0.0743402	0.0722505	0.0798083	0.0695777	0.066898	0.0774714	0.0662891	0.0644001	0.0697287	0.0676192	0.0615528	0.0679373	0.073391	0.0662545	0.00713653	Up	0.002184	NC	No	Yes	Yes	No
Pcbp3	0.0605763	0.0583993	0.0646733	0.0530463	0.0674928	0.0687628	0.0483357	0.0541371	0.0490347	0.0462585	0.0675628	0.0647364	0.0621585	0.0550109	0.00714759	Up	0.0295	Up	No	No	No	No
Lysmd2	0.0777642	0.0711992	0.0823961	0.0857113	0.0892056	0.0829665	0.0752142	0.0580563	0.0711886	0.0790148	0.0831731	0.0796994	0.0815405	0.0743911	0.00714942	Up	0.009117	Up	No	No	No	No
Cdc14b	0.0726412	0.0516621	0.0543493	0.04845	0.0488939	0.0568755	0.055136	0.0466293	0.0501065	0.0457557	0.0445825	0.0477317	0.0554787	0.0483236	0.00715506	Up	0.024586	NC	No	No	No	No
Bhlha15	0.0496258	0.0573848	0.0736073	0.0521821	0.0554262	0.0477942	0.0390185	0.0424191	0.0680046	0.0516172	0.0519039	0.0400324	0.0560034	0.0488326	0.00717078	Up	0.018958	NC	No	No	No	Yes
Dnajc10	0.112437	0.119782	0.137028	0.129005	0.125227	0.108157	0.102199	0.113365	0.132232	0.115598	0.121346	0.103729	0.121939	0.114745	0.00719467	Up	0.005751	Up	Yes	No	No	No
Trip11	0.0845604	0.101949	0.097714	0.0773167	0.0885922	0.0900583	0.0802777	0.0821518	0.0914367	0.0716248	0.0871701	0.084352	0.0900317	0.0828355	0.00719617	Up	0.040478	NC	No	Yes	No	No
Ndel1	0.0837788	0.103557	0.0894623	0.0880331	0.101782	0.092136	0.0788218	0.0896272	0.0867766	0.0823697	0.0937233	0.0841813	0.093125	0.0859166	0.00720837	Up	0.005959	NC	No	No	Yes	No
Ppp2r4	0.0565099	0.069743	0.0606074	0.0623869	0.0505256	0.0634841	0.0474606	0.0573119	0.0562788	0.0546673	0.0445782	0.0596036	0.0605428	0.0533167	0.00722608	Up	0.002727	NC	No	No	No	No
Smim4	0.161813	0.167457	0.170569	0.170289	0.180447	0.167157	0.153571	0.156589	0.164371	0.154368	0.175629	0.169795	0.169622	0.162387	0.00723456	Up	0.036049	NC	No	No	No	No
Ap1g1	0.0447834	0.0494019	0.0415543	0.0473209	0.0411674	0.0408918	0.0385117	0.0339639	0.0378389	0.0332531	0.0417491	0.0362923	0.0441866	0.0369348	0.00725179	Up	0.036169	NC	No	No	No	No
Rprd1b	0.0393149	0.0462052	0.0488711	0.0489551	0.0605389	0.0577356	0.0364581	0.0375299	0.0403993	0.0417984	0.0561052	0.0457942	0.0502701	0.0430142	0.00725596	Up	0.002779	NC	No	No	No	No
Arpc5l	0.0991997	0.0914691	0.0993182	0.102347	0.115432	0.113029	0.097199	0.0886108	0.095375	0.097297	0.101583	0.0969645	0.103466	0.0961715	0.00729424	Up	0.032012	NC	No	No	No	No
Dcaf8	0.0925701	0.0925404	0.0966081	0.0921778	0.105072	0.0999917	0.0933609	0.0765091	0.0912424	0.0898593	0.0972076	0.0868604	0.0964933	0.0891733	0.00732007	Up	0.03785	Up	No	No	Yes	No
Map3k2	0.0313298	0.0411085	0.0300686	0.0262039	0.0434995	0.0340524	0.0288938	0.0248719	0.0232592	0.020456	0.0354644	0.0293673	0.0343771	0.0270521	0.00732502	Up	0.013085	NC	No	No	No	No
Tmem39a	0.072598	0.0702065	0.0853265	0.0718537	0.0747257	0.0642476	0.0657631	0.0576657	0.0773417	0.0674336	0.0659273	0.0608521	0.0731597	0.0658306	0.00732909	Up	0.002788	NC	Yes	No	No	No
Sgms1	0.0545308	0.0513735	0.0464862	0.0425739	0.0662122	0.0551367	0.0427191	0.0468364	0.0390566	0.0422124	0.0536718	0.0477979	0.0527189	0.0453824	0.00733651	Up	0.010872	NC	Yes	Yes	No	No
Rmnd5a	0.0840923	0.0839646	0.070179	0.080986	0.0884189	0.0750672	0.080281	0.0696643	0.0648883	0.0764916	0.0846524	0.0626793	0.0804513	0.0731095	0.00734186	Up	0.012511	Up	No	No	No	No
Pde7b	0.095571	0.0238896	0.102284	0.0815987	0.0874647	0.118004	0.0838471	0.0147415	0.0959835	0.0825425	0.0828825	0.104604	0.084802	0.0774335	0.00736857	Up	0.018158	NC	No	No	No	Yes
Arfgef3	0.0945804	0.093133	0.095227	0.0833285	0.0987724	0.0923996	0.0855066	0.0798706	0.0894641	0.0801458	0.098127	0.0800923	0.0929068	0.0855344	0.00737248	Up	0.015902	NC	No	Yes	No	No
S100a11	0.12957	0.116412	0.11038	0.118821	0.106258	0.119315	0.119133	0.10843	0.112656	0.106206	0.105271	0.104803	0.116793	0.109416	0.00737618	Up	0.042226	NC	No	No	No	No
Nfe2l1	0.0810146	0.0723341	0.0942343	0.0816937	0.0942182	0.0965064	0.0724994	0.0726356	0.0815427	0.075503	0.0850326	0.0884724	0.0866669	0.079281	0.00738594	Up	0.008645	NC	No	No	Yes	No
Gfod2	0.0432368	0.0411918	0.0441232	0.0329508	0.0448525	0.0411077	0.0367825	0.0234454	0.0362174	0.0342901	0.0369668	0.0354336	0.0412438	0.033856	0.00738782	Up	0.031782	NC	No	No	No	No
Gpc4	0.0741108	0.0752971	0.0753265	0.0662938	0.0629763	0.0623316	0.0607904	0.062624	0.0661714	0.065014	0.0580684	0.0593167	0.0693894	0.0619975	0.00739188	Up	0.016094	NC	Yes	Yes	No	Yes
Cry2	0.0535702	0.0535334	0.0502826	0.0677173	0.055219	0.0471181	0.0463346	0.0377117	0.0537818	0.0565937	0.0494878	0.0391605	0.0545735	0.0471783	0.00739512	Up	0.037227	NC	Yes	No	No	No
Gclm	0.107412	0.0974277	0.0988253	0.0983156	0.116018	0.108642	0.10447	0.0884785	0.0855752	0.0966742	0.106328	0.100633	0.10444	0.0970265	0.00741347	Up	0.008821	NC	No	No	No	No
Scml4	0.0404763	0.0462521	0.0419354	0.0374513	0.0388017	0.0447693	0.035038	0.027182	0.0379602	0.0254276	0.0382302	0.0412724	0.0416143	0.0341851	0.00742927	Up	0.045184	NC	Yes	Yes	Yes	No
Camk2n2	0.0852184	0.0865887	0.103705	0.0761711	0.0916246	0.0843701	0.0681248	0.0846552	0.094796	0.073278	0.0890502	0.0731969	0.0879464	0.0805168	0.00742952	Up	0.030083	NC	No	No	Yes	No
Sun1	0.0467996	0.0601794	0.0601846	0.053688	0.061893	0.0541659	0.0478885	0.0443906	0.0512079	0.0510893	0.0531144	0.0445923	0.0561518	0.0487138	0.00743795	Up	0.027358	NC	Yes	Yes	No	No
Dcaf11	0.0660106	0.071264	0.0821359	0.0837126	0.0851667	0.0797435	0.0648511	0.0562206	0.0725342	0.0809335	0.0799983	0.0687992	0.0780056	0.0705562	0.00744941	Up	0.01853	NC	No	No	No	No
Tmem263	0.0362608	0.0597378	0.0435876	0.0453692	0.0455113	0.0422167	0.0307135	0.0423199	0.040961	0.0317045	0.0401051	0.0419704	0.0454472	0.0379624	0.00748483	Up	0.039913	NC	No	No	No	No
Tusc3	0.118306	0.110002	0.122353	0.126544	0.112924	0.107343	0.111506	0.0991218	0.124721	0.107411	0.107055	0.102636	0.116245	0.108742	0.00750336	Up	0.049837	NC	No	No	No	No
Lmo7	0.0684998	0.0672439	0.0631327	0.0699513	0.0629293	0.067895	0.0594985	0.0626848	0.0603627	0.0589716	0.0621035	0.050986	0.0666087	0.0591012	0.00750749	Up	0.027532	NC	Yes	Yes	No	Yes
Ulk2	0.061442	0.0612903	0.0592719	0.0589757	0.0740567	0.0603597	0.0508047	0.0477235	0.0531584	0.0437737	0.0732484	0.0616287	0.0625661	0.0550562	0.00750982	Up	0.042028	NC	No	No	No	No
Tmem134	0.0772635	0.0909374	0.0971496	0.0817416	0.085164	0.088227	0.0630801	0.0775723	0.0920138	0.080208	0.0773516	0.0851538	0.0867472	0.0792299	0.00751728	Up	0.01765	NC	No	No	No	No
Ndufa6	0.158541	0.142093	0.14311	0.147695	0.175381	0.16811	0.149156	0.134386	0.137236	0.139344	0.164753	0.164833	0.155822	0.148285	0.00753669	Up	0.000904	NC	No	No	No	No
Bpnt1	0.0703428	0.0559995	0.0632574	0.0698446	0.0724049	0.0669392	0.0659713	0.0500022	0.0494346	0.0572496	0.0723951	0.0583756	0.0664647	0.0589047	0.00755997	Up	0.016191	NC	No	No	No	No
Eny2	0.062395	0.0663356	0.0640842	0.0668648	0.0721741	0.0745359	0.0581898	0.0560881	0.0560416	0.0542228	0.0701257	0.066333	0.0677316	0.0601668	0.0075648	Up	0.004999	NC	No	No	No	No
Rian	0.0822596	0.0872225	0.0815308	0.108049	0.0818745	0.0624769	0.0791662	0.0822345	0.0749051	0.0899041	0.0741774	0.0576269	0.0839023	0.0763357	0.00756659	Up	0.018832	NC	No	No	No	No
H1f0	0.0732072	0.101694	0.108087	0.0840501	0.126306	0.100302	0.0665176	0.0944467	0.0992479	0.0815008	0.116461	0.0900307	0.0989411	0.0913674	0.00757368	Up	0.001247	Up	Yes	No	No	No
Tmem108	0.0414359	0.03716	0.0397306	0.0337081	0.055503	0.0446856	0.0322953	0.0308049	0.031446	0.0232806	0.0506235	0.0383242	0.0420372	0.0344624	0.00757479	Up	0.000285	Up	No	Yes	No	Yes
Tubb2a	0.111187	0.105665	0.140785	0.100095	0.0613457	0.0934242	0.113533	0.0952832	0.124803	0.0907707	0.0589869	0.0835839	0.102084	0.0944935	0.00759025	Up	0.03571	Up	No	No	No	No
Hdac4	0.0548732	0.0455483	0.0612994	0.0492716	0.0620716	0.0581116	0.0494621	0.0406176	0.0482964	0.0377897	0.061708	0.0476739	0.0551959	0.0475913	0.00760464	Up	0.011911	NC	No	No	No	No
Dnajc12	0.0688918	0.063104	0.0610043	0.0551848	0.0640916	0.0655501	0.0581982	0.0568317	0.0522412	0.0592724	0.0535631	0.0520862	0.0629711	0.0553655	0.00760564	Up	0.029941	NC	No	No	Yes	No
Mrps12	0.0679369	0.106039	0.138544	0.0823345	0.135358	0.128943	0.0595137	0.0994716	0.134711	0.0785733	0.121975	0.119255	0.109859	0.10225	0.00760928	Up	0.003977	NC	No	No	No	No
Ica1l	0.0516223	0.052074	0.0683366	0.0539628	0.0801543	0.0965048	0.0513217	0.0401381	0.0553317	0.0495247	0.0744784	0.0860991	0.0671092	0.0594823	0.00762687	Up	0.013042	NC	No	No	No	No
Rtl1	0.116136	0.0849342	0.0836727	0.0788841	0.0961654	0.103021	0.108329	0.0691132	0.0807796	0.0807933	0.0866521	0.0913423	0.0938023	0.0861683	0.00763405	Up	0.031776	NC	Yes	Yes	Yes	No
Cdk2ap1	0.088991	0.0863975	0.107023	0.0841405	0.0713063	0.0856115	0.0735929	0.0851948	0.0997937	0.0758223	0.0667498	0.0764321	0.087245	0.0795976	0.00764737	Up	0.011177	NC	No	No	No	No
Tbcb	0.0532431	0.0507092	0.0556751	0.0509836	0.0519321	0.0520049	0.0402623	0.0381065	0.0437927	0.0518819	0.0446933	0.0498778	0.0524247	0.0447691	0.00765557	Up	0.024721	NC	No	No	No	No
Clk4	0.0641636	0.0595518	0.0604388	0.072745	0.0618242	0.0635499	0.0601693	0.0588092	0.0523411	0.0597465	0.0580227	0.047172	0.0637122	0.0560435	0.00766877	Up	0.026154	NC	No	No	No	No
Ube2z	0.0539572	0.0535654	0.0596071	0.0579622	0.0625624	0.0664239	0.0512615	0.0408543	0.0551556	0.0491453	0.0558763	0.055648	0.059013	0.0513235	0.00768954	Up	0.004293	NC	No	Yes	No	No
Rab11a	0.114987	0.11632	0.0934153	0.116255	0.132025	0.132448	0.109807	0.103079	0.0941838	0.106568	0.122844	0.12276	0.117575	0.109874	0.00770152	Up	0.011773	Down	Yes	No	No	Yes
Mapk8ip3	0.0678163	0.0686274	0.0664697	0.0664553	0.0644998	0.0724939	0.0596132	0.0591462	0.0650872	0.0605961	0.0546701	0.0610201	0.0677271	0.0600221	0.00770491	Up	0.003425	Up	No	No	No	No
Runx1t1	0.0517372	0.0568827	0.0601637	0.0506689	0.0666796	0.0505284	0.0454798	0.0531904	0.0469195	0.0377294	0.0593729	0.0476876	0.0561101	0.0483966	0.00771349	Up	0.008308	Up	Yes	No	No	Yes
Rsrc2	0.136804	0.119483	0.120279	0.119392	0.142006	0.124401	0.125028	0.106216	0.113176	0.124825	0.132081	0.114727	0.127061	0.119342	0.00771863	Up	0.038354	NC	No	No	No	No
Kdm2a	0.0792507	0.0719738	0.070895	0.0637638	0.0859652	0.0846163	0.0693534	0.0657469	0.0681638	0.0625109	0.0729773	0.0712943	0.0760775	0.0683411	0.00773634	Up	0.01434	NC	No	No	No	No
Tmem50a	0.167587	0.161886	0.166861	0.162274	0.187536	0.197116	0.153576	0.14738	0.164053	0.157907	0.181191	0.192625	0.173877	0.166122	0.00775471	Up	0.014313	Up	No	No	No	No
Tmem242	0.0550206	0.0643593	0.0732617	0.0575073	0.0584149	0.0682353	0.0505316	0.0573016	0.0617199	0.0470548	0.0533162	0.0602902	0.0627999	0.0550357	0.00776416	Up	0.001094	NC	No	No	No	No
Tmem130	0.0645385	0.0447053	0.0500072	0.0656787	0.0500355	0.0439549	0.0559903	0.0399621	0.0398237	0.0596593	0.0442199	0.0326524	0.0531533	0.0453846	0.00776876	Up	0.000807	NC	No	No	No	No
Kcnd2	0.0292504	0.0352594	0.0293553	0.0150855	0.0170908	0.0146169	0.0176629	0.0187739	0.019516	0.0147121	0.0126559	0.0106908	0.0234431	0.0156686	0.00777447	Up	0.023597	NC	No	No	No	No
Txndc5	0.058785	0.0684242	0.0833881	0.0515869	0.0566891	0.0522117	0.0422799	0.0639127	0.0819397	0.0518901	0.0422021	0.0421794	0.0618475	0.0540673	0.00778016	Up	0.040908	NC	Yes	No	No	No
Nol4	0.148291	0.140353	0.171838	0.139486	0.164096	0.176607	0.137621	0.129297	0.172671	0.132644	0.146797	0.174953	0.156779	0.148997	0.0077814	Up	0.035463	NC	Yes	No	No	No
Neurl1a	0.0196099	0.0294941	0.0366348	0.0202303	0.0188714	0.0231427	0.0162357	0.0196489	0.0204189	0.0175316	0.0143585	0.013091	0.0246639	0.0168808	0.0077831	Up	0.014769	NC	Yes	Yes	Yes	No
R3hdm2	0.0731388	0.0711479	0.0666965	0.0667563	0.0769641	0.0817033	0.0680006	0.0609535	0.0565203	0.0671456	0.0676943	0.0692921	0.0727345	0.0649344	0.00780006	Up	0.009422	NC	No	No	Yes	No
Mettl1	0.0646596	0.0625714	0.0679203	0.0568442	0.0735653	0.0606089	0.0492305	0.0560406	0.0700068	0.0509726	0.0679526	0.0451215	0.0643616	0.0565541	0.00780751	Up	0.035838	NC	No	No	No	No
Ywhaz	0.191523	0.2114	0.222747	0.2043	0.205758	0.203175	0.184815	0.193546	0.221465	0.19257	0.194814	0.204834	0.206484	0.198674	0.00780983	Up	0.045148	NC	No	No	No	No
Rims2	0.0839104	0.0627068	0.0638733	0.0575974	0.0620163	0.0630821	0.0730166	0.055879	0.0577688	0.053011	0.0572074	0.0493508	0.065531	0.0577056	0.00782544	Up	0.003456	NC	No	No	No	Yes
Sec11a	0.10896	0.103473	0.108842	0.101541	0.0947565	0.0981816	0.0968154	0.0989043	0.101414	0.0880932	0.0916801	0.0917949	0.102626	0.0947837	0.00784209	Up	0.005628	NC	No	No	No	Yes
AC149090.1	0.0599802	0.0635946	0.0828549	0.0705051	0.0771739	0.079307	0.0583599	0.0524359	0.0710153	0.0632564	0.0764347	0.0647992	0.072236	0.0643836	0.00785238	Up	0.019455	NC	No	No	No	No
Msi2	0.19312	0.183214	0.190003	0.16629	0.190138	0.177851	0.18609	0.171831	0.189357	0.165507	0.181849	0.15876	0.183436	0.175566	0.00787026	Up	0.039195	NC	Yes	Yes	No	Yes
Magi1	0.0662394	0.069576	0.0574524	0.0546732	0.104038	0.0708834	0.0617969	0.0509276	0.0577877	0.0499551	0.0970042	0.0581267	0.070477	0.0625997	0.00787729	Up	0.035979	NC	Yes	No	Yes	Yes
Aida	0.0736766	0.0681203	0.0857709	0.0655268	0.0796161	0.075549	0.0684122	0.0532618	0.0724607	0.0680915	0.0698092	0.0688829	0.0747099	0.0668197	0.00789024	Up	0.028063	NC	No	No	No	No
Desi1	0.0822021	0.0828579	0.0913971	0.0850343	0.0818584	0.0870084	0.074841	0.0696875	0.0829242	0.0833593	0.0740315	0.0781522	0.0850597	0.077166	0.00789374	Up	0.003352	NC	No	No	No	No
Rcn2	0.0767887	0.0683528	0.0555592	0.0575643	0.0594026	0.0591222	0.0669385	0.0553132	0.0551372	0.0483774	0.0529665	0.0503773	0.0627983	0.0548517	0.00794665	Up	0.005992	NC	No	No	No	No
Ttc39b	0.0504824	0.0615561	0.0585212	0.0604458	0.0787474	0.0718902	0.0503608	0.0517604	0.0542605	0.0481171	0.0712124	0.0581517	0.0636072	0.0556438	0.00796336	Up	0.012521	NC	No	No	No	No
Btbd2	0.0285737	0.0380001	0.0412677	0.0388948	0.0361506	0.0325944	0.0261689	0.0253067	0.0284291	0.025043	0.0298313	0.0328973	0.0359136	0.027946	0.00796751	Up	0.023251	NC	Yes	No	No	No
Kansl1	0.102847	0.0919248	0.0890708	0.0827925	0.105754	0.097134	0.0981196	0.0784483	0.0701883	0.0797338	0.103943	0.0912766	0.0949204	0.0869517	0.00796869	Up	0.033775	NC	Yes	No	No	No
Fam220a	0.0572057	0.0658566	0.078504	0.0580355	0.062678	0.0649337	0.0517827	0.0540988	0.0704541	0.0489082	0.053541	0.0603978	0.0645356	0.0565304	0.00800515	Up	0.00072	NC	No	No	No	No
Srsf9	0.0928406	0.0805937	0.0847287	0.0811829	0.090158	0.0951188	0.0756162	0.0657586	0.0801993	0.0800772	0.0803899	0.0945341	0.0874371	0.0794292	0.00800792	Up	0.039044	NC	No	No	No	No
Golt1b	0.0805708	0.0891213	0.0961	0.0808958	0.0774761	0.0731551	0.0698934	0.084953	0.090262	0.070878	0.067241	0.0659602	0.0828865	0.0748646	0.00802191	Up	0.000756	NC	No	No	No	No
Ryk	0.0495178	0.0597663	0.0579638	0.0525351	0.0586243	0.0509588	0.0477356	0.0401973	0.0503975	0.0441853	0.0535724	0.0450461	0.0548944	0.0468557	0.00803866	Up	0.023214	NC	No	No	No	No
Pdss2	0.0479088	0.0504868	0.0446263	0.0413567	0.0420933	0.0511683	0.0463782	0.0338561	0.040377	0.0316487	0.0370409	0.0400894	0.0462734	0.0382317	0.00804167	Up	0.015898	NC	No	Yes	No	No
Blmh	0.0691453	0.0758652	0.0829146	0.0655953	0.0676012	0.0768557	0.063026	0.067206	0.0770427	0.0565124	0.0643253	0.0615547	0.0729962	0.0649445	0.0080517	Up	0.00499	NC	No	No	Yes	No
Sf1	0.0887521	0.0929572	0.109835	0.108429	0.113839	0.102073	0.0840458	0.0930768	0.0990873	0.100682	0.105041	0.0851846	0.102647	0.0945196	0.00812789	Up	0.017717	NC	No	No	No	No
Ergic3	0.0946417	0.0965147	0.102847	0.0923641	0.0983097	0.0992621	0.0833157	0.0906158	0.091005	0.0922651	0.0831247	0.0948167	0.0973231	0.0891905	0.00813261	Up	0.016265	NC	No	No	Yes	No
Plpp5	0.102951	0.104695	0.12985	0.0922531	0.102124	0.10788	0.0945782	0.0971264	0.115925	0.0883176	0.100613	0.094257	0.106625	0.0984696	0.00815587	Up	0.010457	NC	No	No	No	No
Pros1	0.0761284	0.0924617	0.0965368	0.0860496	0.0905814	0.119326	0.0694337	0.0884622	0.0918427	0.0794308	0.0744066	0.10856	0.093514	0.0853561	0.00815792	Up	0.007266	NC	No	No	No	No
Sys1	0.107888	0.102837	0.119088	0.0955524	0.10306	0.101974	0.094074	0.102325	0.115405	0.0876633	0.0861292	0.0957532	0.105067	0.0968916	0.0081751	Up	0.023009	NC	No	No	No	No
Mtmr6	0.0670452	0.0739961	0.0761073	0.0720392	0.0746763	0.0682402	0.055754	0.0666903	0.0622098	0.0630597	0.0754362	0.0598805	0.0720174	0.0638384	0.00817897	Up	0.010047	NC	No	No	No	No
Trim35	0.155357	0.114588	0.122122	0.151662	0.164534	0.139847	0.142452	0.116227	0.114701	0.140077	0.158224	0.127057	0.141351	0.133123	0.0082285	Up	0.015338	Up	No	No	No	No
Gmds	0.0785144	0.0839276	0.0858221	0.0820457	0.0814689	0.0780314	0.0736017	0.0738117	0.083596	0.0666427	0.0743692	0.068366	0.081635	0.0733979	0.00823712	Up	0.007058	NC	Yes	Yes	No	No
Daam1	0.0990944	0.0875668	0.121986	0.0786699	0.106359	0.105661	0.088103	0.0941688	0.109094	0.0657816	0.0929065	0.0997563	0.0998895	0.0916351	0.00825444	Up	0.048587	NC	Yes	No	Yes	Yes
Poldip3	0.0623863	0.0551515	0.0630342	0.065425	0.0614166	0.0613022	0.0482328	0.0475785	0.0522326	0.0532003	0.060989	0.0569423	0.0614526	0.0531959	0.00825669	Up	0.011321	NC	No	No	No	No
Tmem106c	0.0586628	0.0556209	0.0625953	0.0633653	0.0510722	0.0625932	0.0469254	0.0511562	0.0516316	0.056743	0.0480606	0.0497038	0.058985	0.0507034	0.00828154	Up	0.004449	NC	Yes	No	No	No
Npas4	0.0338793	0.0426688	0.0467037	0.0288984	0.0216026	0.0320437	0.023117	0.0363684	0.0310509	0.0180892	0.0181726	0.0292777	0.0342994	0.0260126	0.00828678	Up	0.009695	NC	Yes	No	No	No
Srsf3	0.129479	0.128516	0.149392	0.142682	0.1673	0.14949	0.122433	0.120811	0.14071	0.144194	0.160794	0.128103	0.144476	0.136174	0.00830219	Up	0.040166	NC	Yes	No	No	No
Emc10	0.0758213	0.0858644	0.0933963	0.0938062	0.0746162	0.102162	0.0671182	0.0810437	0.0944087	0.079785	0.06414	0.0892335	0.0876111	0.0792881	0.008323	Up	0.015096	NC	No	No	No	No
Rab3b	0.0520732	0.0503943	0.0494546	0.0445605	0.0528278	0.0531809	0.0397455	0.0371908	0.0353797	0.0491886	0.046355	0.044677	0.0504152	0.0420894	0.00832576	Up	0.033074	Up	No	No	No	No
Nxf1	0.0791303	0.075904	0.0805776	0.0859957	0.0768023	0.0736222	0.0802599	0.0662001	0.0701608	0.0665042	0.0683988	0.0703938	0.078672	0.0703196	0.00835241	Up	0.03322	NC	No	No	No	No
Rbbp7	0.0735909	0.0835774	0.0789383	0.0874217	0.0808805	0.0759544	0.0668041	0.0664597	0.0738704	0.0726414	0.0765373	0.0739036	0.0800606	0.0717027	0.0083578	Up	0.020416	NC	No	Yes	No	No
Asic2	0.0313606	0.0391965	0.028948	0.0328556	0.0231822	0.0259598	0.0229085	0.0273117	0.0254216	0.0194034	0.0201044	0.0159727	0.0302505	0.0218537	0.00839677	Up	0.004937	NC	Yes	Yes	No	No
Gprasp1	0.0924271	0.0920041	0.0914092	0.0897736	0.106818	0.086515	0.0876439	0.0851615	0.0805362	0.0795515	0.0972278	0.078439	0.0931579	0.08476	0.00839786	Up	0.000292	NC	No	No	No	No
Cdh4	0.057146	0.0558717	0.0584213	0.0294666	0.0407527	0.0347712	0.0425384	0.0405437	0.0543836	0.0236662	0.036182	0.0286973	0.0460716	0.0376685	0.00840303	Up	0.010323	NC	Yes	Yes	No	Yes
Cyhr1	0.0553452	0.0513773	0.0666827	0.0679554	0.0580088	0.0567486	0.0492637	0.0451597	0.0567645	0.0514487	0.0487107	0.0542984	0.059353	0.0509409	0.00841206	Up	0.007653	NC	No	Yes	No	No
Syt1	0.0201549	0.0315162	0.0249616	0.0211468	0.0156304	0.0134187	0.0163906	0.0157898	0.00877138	0.0147682	0.0103042	0.00983248	0.0211381	0.0126428	0.00849532	Up	0.016513	NC	No	Yes	Yes	No
Gna11	0.0965294	0.10505	0.106723	0.104007	0.104319	0.110508	0.0941009	0.0877195	0.104975	0.0952327	0.0969028	0.0972071	0.104523	0.0960229	0.00849994	Up	0.018734	NC	No	No	No	No
Mcc	0.167011	0.145138	0.171857	0.117656	0.183121	0.157553	0.155073	0.140404	0.166315	0.114757	0.17614	0.138616	0.157056	0.148551	0.00850536	Up	0.017322	NC	Yes	No	Yes	No
Slc6a6	0.153085	0.152146	0.16473	0.145043	0.190379	0.153398	0.152228	0.143506	0.154763	0.139107	0.173887	0.144188	0.159797	0.15128	0.00851696	Up	0.009658	NC	Yes	No	No	Yes
Creld2	0.0752366	0.0786551	0.118822	0.069085	0.0472709	0.0489796	0.0669308	0.0753058	0.109211	0.0582643	0.0369001	0.040179	0.0730083	0.0644653	0.00854302	Up	0.000584	NC	No	No	No	No
Ralgapa1	0.0784815	0.0930162	0.0596148	0.0603045	0.0637975	0.0655876	0.067403	0.0760701	0.0519304	0.0513299	0.0615336	0.061273	0.0701337	0.06159	0.0085437	Up	0.010087	NC	No	No	No	No
Jazf1	0.0455651	0.0419987	0.0435241	0.029597	0.042803	0.0375398	0.039131	0.030769	0.0282506	0.027475	0.0382983	0.0257174	0.0401713	0.0316069	0.00856441	Up	0.008559	NC	Yes	No	No	No
Elp4	0.075392	0.0900797	0.073876	0.0687733	0.0920012	0.0794175	0.0598496	0.0715766	0.0765951	0.0673302	0.0825866	0.0701559	0.0799233	0.071349	0.0085743	Up	0.048355	NC	No	No	No	No
Trpc4ap	0.0719341	0.0720061	0.0774816	0.0679521	0.0702141	0.0681159	0.0635168	0.0580225	0.0708376	0.0635099	0.0624384	0.0579051	0.071284	0.0627051	0.00857891	Up	0.001351	NC	No	No	No	No
Dpp10	0.0504088	0.0421758	0.0425251	0.046034	0.030256	0.0236186	0.0443359	0.0324014	0.0322429	0.0312772	0.0237551	0.0194942	0.0391697	0.0305844	0.00858528	Up	0.002701	Up	No	Yes	No	No
Nptxr	0.0412651	0.0468666	0.0454843	0.0396068	0.0454806	0.0442705	0.035871	0.0352469	0.0356122	0.0278575	0.0408956	0.0359584	0.043829	0.0352403	0.00858873	Up	0.001011	NC	No	No	No	No
Fam20a	0.0752222	0.0799189	0.0797262	0.0545197	0.0699104	0.0570615	0.0553439	0.0627421	0.0779416	0.0519719	0.0669805	0.0498169	0.0693932	0.0607995	0.00859367	Up	0.045968	NC	No	No	No	No
Sstr3	0.0952582	0.0791808	0.0947945	0.105786	0.0861471	0.0962879	0.0805461	0.06795	0.080983	0.0938871	0.0879417	0.0945636	0.0929092	0.0843119	0.00859725	Up	0.02828	NC	No	No	No	No
Snrpd2	0.068003	0.0561218	0.0651346	0.0734283	0.0570696	0.0815568	0.0605706	0.055746	0.0627649	0.0600526	0.0481688	0.0624107	0.0668857	0.0582856	0.00860008	Up	0.029133	NC	Yes	Yes	No	No
Ppp2r5a	0.0933127	0.0958639	0.0846949	0.0795099	0.0917669	0.084917	0.0759605	0.0834581	0.0834655	0.0780498	0.0801081	0.0773478	0.0883442	0.0797316	0.0086126	Up	0.021945	NC	No	Yes	No	No
Glg1	0.103646	0.0950456	0.0920506	0.0786704	0.146097	0.111277	0.0897483	0.0801004	0.0964004	0.0695984	0.134025	0.104964	0.104464	0.0958061	0.00865817	Up	0.030848	NC	No	No	No	No
Erp44	0.115268	0.124843	0.137889	0.114263	0.101395	0.0976042	0.106772	0.107709	0.141161	0.101662	0.0887448	0.0931981	0.11521	0.106541	0.00866932	Up	0.032871	Up	No	Yes	No	No
Srek1	0.0780811	0.0652981	0.0823103	0.0662675	0.0859462	0.0834321	0.0707067	0.0629843	0.0603608	0.0639691	0.0781112	0.0731379	0.0768892	0.0682117	0.00867757	Up	0.032469	NC	Yes	No	No	No
Sec22b	0.11023	0.140783	0.14422	0.125279	0.133094	0.131465	0.10268	0.119023	0.134328	0.126017	0.127782	0.123153	0.130845	0.122164	0.00868116	Up	0.034891	NC	No	No	No	No
Jagn1	0.07393	0.0682717	0.0847198	0.0713796	0.0667333	0.0815651	0.0577724	0.0671367	0.0727809	0.0647861	0.0682861	0.0637425	0.0744333	0.0657508	0.00868246	Up	0.044096	NC	No	No	No	No
Tcta	0.0603067	0.054495	0.0783058	0.0595104	0.0722994	0.0587366	0.058975	0.0479026	0.0616911	0.0574628	0.0551038	0.0502272	0.0639423	0.0552271	0.00871522	Up	0.026999	Up	No	No	No	No
Scnn1b	0.0748606	0.0805507	0.10297	0.0735277	0.0828079	0.0889225	0.0649996	0.0826259	0.0868956	0.0677234	0.0721096	0.0768953	0.0839398	0.0752082	0.00873161	Up	0.018786	NC	No	No	No	Yes
Gsk3b	0.120841	0.122722	0.118937	0.111933	0.142813	0.13766	0.113797	0.108644	0.120213	0.10443	0.131377	0.123969	0.125818	0.117072	0.00874617	Up	0.013581	NC	No	No	No	No
Sdk1	0.0720601	0.0685207	0.0832101	0.0655735	0.0585604	0.0662288	0.0705423	0.0479574	0.074065	0.0594159	0.0537474	0.0558424	0.0690256	0.0602617	0.00876385	Up	0.022465	NC	Yes	Yes	Yes	Yes
Trappc2l	0.105587	0.0961144	0.105293	0.0975207	0.105693	0.116087	0.0902828	0.0791292	0.107529	0.0857102	0.0981386	0.112901	0.104382	0.095615	0.00876748	Up	0.033588	NC	No	No	No	No
Tmem219	0.0879837	0.0770032	0.0960456	0.0833328	0.0846992	0.0857845	0.0766809	0.0667513	0.0829331	0.0788033	0.0783555	0.0786013	0.0858082	0.0770209	0.00878727	Up	0.001235	NC	No	No	No	No
Sort1	0.0995632	0.102372	0.114693	0.0922825	0.113828	0.107282	0.088604	0.0933559	0.103798	0.0964727	0.102393	0.0926112	0.105003	0.0962058	0.0087975	Up	0.022594	NC	No	No	No	No
Ctbp1	0.106358	0.100427	0.105297	0.107507	0.0968918	0.106883	0.0968033	0.089762	0.111128	0.09445	0.0867817	0.0915149	0.103894	0.0950733	0.00882079	Up	0.034522	NC	No	No	No	No
Hnrnpdl	0.11677	0.160128	0.157329	0.135353	0.14873	0.130466	0.112533	0.155182	0.147597	0.123434	0.134451	0.122456	0.141463	0.132609	0.0088539	Up	0.002651	NC	No	No	No	No
Tmx1	0.107072	0.108574	0.119765	0.119688	0.121997	0.126257	0.0987216	0.0929728	0.121676	0.106732	0.111355	0.118764	0.117226	0.10837	0.00885544	Up	0.015873	NC	Yes	No	No	No
Derl3	0.0381005	0.0602362	0.0633584	0.0361963	0.024288	0.0333474	0.0274338	0.0425044	0.0587379	0.0227478	0.0244635	0.0264109	0.0425878	0.0337164	0.0088714	Up	0.019622	Up	No	No	No	No
Rps18	0.178423	0.21996	0.208969	0.179278	0.0743163	0.15649	0.16426	0.21562	0.189154	0.176067	0.0716757	0.147282	0.169573	0.160676	0.00889636	Up	0.025378	NC	No	No	No	No
Arfgap1	0.0661798	0.068883	0.0790531	0.0627891	0.0663482	0.0643555	0.0597331	0.0522432	0.0730796	0.0548622	0.0586879	0.0555953	0.0679348	0.0590335	0.00890122	Up	0.002597	NC	No	No	No	No
Faap20	0.0398047	0.0393721	0.0396404	0.0417776	0.0410743	0.0535342	0.0351118	0.0318586	0.0368863	0.0276324	0.0327494	0.0373639	0.0425339	0.0336004	0.00893349	Up	0.008791	NC	Yes	No	No	No
Nfasc	0.0635615	0.063158	0.0757529	0.0647881	0.081785	0.0819808	0.0588483	0.0450548	0.0642724	0.0535932	0.0751013	0.080505	0.0718377	0.0628958	0.00894189	Up	0.013838	NC	No	No	No	No
Tulp4	0.131087	0.169993	0.134798	0.141055	0.158852	0.13366	0.127052	0.14799	0.125247	0.13216	0.153068	0.130253	0.144907	0.135962	0.00894574	Up	0.024214	NC	No	Yes	No	No
Pnmal1	0.0702466	0.0699928	0.0707072	0.0857668	0.0745628	0.0797917	0.0646023	0.0559474	0.07059	0.0812912	0.0615836	0.0633182	0.075178	0.0662221	0.00895589	Up	0.019184	NC	No	No	No	No
Rgs7	0.0804811	0.0774547	0.0740952	0.0613712	0.0780549	0.0661678	0.0722442	0.0558117	0.0615131	0.0582809	0.0742207	0.0617912	0.0729375	0.063977	0.00896051	Up	0.027911	NC	No	No	No	No
Tvp23b	0.111446	0.107941	0.106269	0.112494	0.116602	0.115915	0.102696	0.0968305	0.109283	0.103679	0.104574	0.0997679	0.111778	0.102805	0.00897245	Up	0.019284	NC	No	No	No	No
Kif21a	0.0862624	0.082001	0.0674483	0.0861833	0.090567	0.0743877	0.0740738	0.0783589	0.0649337	0.0681769	0.0798495	0.0675939	0.0811416	0.0721645	0.00897717	Up	0.012988	NC	No	Yes	No	No
Vamp3	0.0883344	0.0980738	0.0993422	0.109117	0.0944404	0.0898736	0.0866314	0.0826981	0.0878756	0.10567	0.0889404	0.0731633	0.0965302	0.0874965	0.00903368	Up	0.017716	NC	No	No	No	No
Ctdspl	0.0870179	0.100538	0.0995408	0.100868	0.08431	0.0857534	0.0761884	0.0837369	0.0894335	0.093159	0.0756383	0.0855676	0.0930047	0.0839539	0.00905079	Up	0.009189	NC	No	Yes	Yes	No
Slc31a1	0.0418192	0.047847	0.0501083	0.039986	0.0522173	0.0498761	0.0318523	0.0385341	0.0439086	0.0320097	0.0427506	0.0384379	0.0469756	0.0379155	0.0090601	Up	6.1e-05	NC	No	No	No	No
Sorl1	0.0799478	0.0845769	0.103242	0.0845276	0.0813532	0.0812791	0.0824279	0.0708408	0.0874135	0.0824705	0.0628307	0.0745348	0.0858211	0.076753	0.00906802	Up	0.044093	NC	Yes	Yes	No	No
Nfix	0.055321	0.0520173	0.0534871	0.0445285	0.0568746	0.0691169	0.0514043	0.0430075	0.0460597	0.0363548	0.0445089	0.0554652	0.0552242	0.0461334	0.00909084	Up	0.001453	NC	No	Yes	No	Yes
Nudt3	0.0775138	0.0652011	0.0776195	0.0634618	0.0716289	0.0806117	0.0623146	0.0658159	0.0669713	0.0657024	0.0589373	0.0617083	0.0726728	0.063575	0.00909783	Up	0.049127	NC	No	Yes	No	No
Slc50a1	0.0667788	0.0573283	0.0612618	0.057799	0.0666048	0.0718506	0.0505867	0.0578437	0.0545709	0.0538066	0.0560477	0.0541732	0.0636039	0.0545048	0.00909907	Up	0.025388	NC	No	No	No	No
Zfp949	0.0750152	0.0467745	0.0648338	0.0684589	0.0528085	0.0452691	0.0687894	0.0428759	0.0525214	0.0524967	0.0429557	0.0388689	0.05886	0.0497513	0.00910868	Up	0.004195	Up	No	No	No	No
Gapvd1	0.0958799	0.0939291	0.095989	0.0924005	0.103806	0.109534	0.082975	0.0815948	0.0837788	0.0852397	0.104842	0.0984407	0.0985896	0.0894785	0.00911109	Up	0.008969	NC	No	Yes	No	No
Jtb	0.0770455	0.0985213	0.0968016	0.0926889	0.0906828	0.0987382	0.0735471	0.0880475	0.0941954	0.0783012	0.0832268	0.0824475	0.0924131	0.0832942	0.00911883	Up	0.01057	NC	No	No	No	No
Srp9	0.0774147	0.0958165	0.106475	0.0775977	0.0794305	0.0835746	0.0672559	0.0858157	0.0911034	0.0738544	0.0749075	0.0726108	0.0867182	0.0775913	0.00912687	Up	0.003628	NC	No	No	No	No
Hmgn3	0.145336	0.144705	0.138916	0.145185	0.166285	0.163018	0.135166	0.13556	0.132425	0.142136	0.157012	0.146298	0.150574	0.141433	0.00914134	Up	0.004315	Up	No	No	No	No
Tcp11	0.0625592	0.0675578	0.0698796	0.0623236	0.0731429	0.0652651	0.0628724	0.0448131	0.0652091	0.0509598	0.0651199	0.0567846	0.066788	0.0576265	0.00916157	Up	0.034103	NC	Yes	Yes	No	No
Atp6ap1	0.310924	0.304837	0.341759	0.332108	0.343839	0.337293	0.298436	0.293018	0.337028	0.330273	0.326442	0.330546	0.32846	0.319291	0.00916947	Up	0.011308	NC	No	No	No	No
Ly6h	0.0186464	0.0200089	0.0219306	0.0148011	0.00635452	0.010013	0.00977506	0.00997522	0.00306404	0.00846158	0.00341792	0.0020319	0.0152924	0.00612095	0.00917147	Up	0.008501	NC	No	No	No	No
Dscam	0.0229459	0.0257044	0.0192041	0.0230791	0.0175273	0.0140705	0.0127333	0.0124993	0.0128446	0.0130089	0.0108686	0.00539094	0.0204219	0.0112243	0.00919761	Up	0.000311	NC	No	Yes	No	No
Rundc3a	0.0924066	0.0863494	0.0975377	0.0924598	0.084148	0.101238	0.0877289	0.0865884	0.0861467	0.0850309	0.0723325	0.0810417	0.0923566	0.0831449	0.00921175	Up	0.023415	NC	No	No	No	No
Araf	0.11632	0.110449	0.11877	0.129862	0.107509	0.112527	0.11171	0.0935981	0.106159	0.116104	0.102079	0.110416	0.115906	0.106678	0.00922849	Up	0.012565	NC	Yes	No	No	Yes
Bex1	0.0647528	0.0702144	0.0758218	0.0888752	0.0982526	0.0902031	0.0664643	0.0607573	0.0645477	0.0788007	0.0861611	0.0758042	0.0813533	0.0720892	0.00926412	Up	0.010149	NC	No	No	No	Yes
Apbb1	0.0474781	0.0386961	0.0485475	0.0454205	0.037665	0.0359667	0.036371	0.0277256	0.0394826	0.0347145	0.0341268	0.0256315	0.0422957	0.0330087	0.009287	Up	0.00055	Up	No	No	No	No
Cplx2	0.108517	0.112144	0.105057	0.107512	0.134041	0.134166	0.0932484	0.0892226	0.100651	0.102317	0.127899	0.132344	0.116906	0.107614	0.00929257	Up	0.037507	Up	No	No	Yes	No
Negr1	0.107264	0.114546	0.115505	0.0946997	0.122595	0.120169	0.10473	0.0929599	0.112458	0.09428	0.111185	0.103386	0.112463	0.103166	0.00929661	Up	0.046586	NC	No	Yes	No	No
Sdk2	0.11271	0.104728	0.114864	0.115627	0.126203	0.126457	0.097416	0.10181	0.112736	0.0947822	0.12166	0.116377	0.116765	0.107464	0.00930103	Up	0.029424	NC	Yes	Yes	No	Yes
Atp2a3	0.121704	0.141152	0.153686	0.128607	0.0984109	0.124706	0.112737	0.135858	0.149146	0.106255	0.0942251	0.114236	0.128044	0.118743	0.00930166	Up	0.021206	NC	No	Yes	No	Yes
Mapre3	0.058825	0.0548732	0.0673203	0.0466329	0.0526305	0.0506617	0.0472269	0.0380396	0.0533689	0.0501036	0.0384296	0.0476634	0.0551573	0.0458053	0.00935193	Up	0.033515	NC	No	No	No	No
Synrg	0.0742083	0.0664741	0.0776918	0.0681655	0.0801785	0.0791008	0.0671508	0.0501356	0.0647486	0.0573879	0.0785327	0.0716361	0.0743032	0.0649319	0.00937121	Up	0.00659	NC	No	No	No	No
Mgea5	0.0881564	0.0968569	0.0924743	0.0919684	0.0962816	0.0979903	0.0889543	0.0725484	0.0892926	0.0834863	0.0827771	0.0903754	0.0939547	0.0845723	0.00938232	Up	0.047314	Up	No	No	No	No
1110008P14Rik	0.0593165	0.0699436	0.0796299	0.0623513	0.0650593	0.0784932	0.051139	0.0579183	0.0780933	0.0551866	0.0562371	0.0596648	0.0691323	0.0597065	0.0094258	Up	0.010061	Up	No	No	No	No
Os9	0.138266	0.138024	0.167741	0.131256	0.131312	0.125954	0.129705	0.134856	0.158431	0.116066	0.117131	0.119664	0.138759	0.129309	0.00944993	Up	0.003977	NC	No	No	No	No
Fam120a	0.0983463	0.109759	0.0972075	0.100089	0.111944	0.10044	0.0995396	0.0889731	0.0876547	0.0898589	0.103521	0.0914636	0.102965	0.0935018	0.00946269	Up	0.021009	NC	Yes	No	Yes	No
Dag1	0.0842471	0.0860997	0.0906439	0.0759476	0.0884346	0.0821843	0.0765919	0.0696961	0.0817448	0.0698148	0.0803352	0.072562	0.0845929	0.0751241	0.00946877	Up	0.001336	NC	No	No	No	No
Ncor1	0.157689	0.143256	0.146206	0.134327	0.165086	0.147885	0.146071	0.124206	0.1422	0.12602	0.157888	0.141068	0.149075	0.139576	0.00949946	Up	0.007018	Up	No	No	No	No
Snrnp70	0.112055	0.0824407	0.112192	0.104744	0.114201	0.104916	0.10508	0.0777566	0.0892235	0.0904212	0.117694	0.0933186	0.105091	0.0955822	0.00950931	Up	0.049418	Up	No	No	No	No
Glt8d1	0.0833141	0.0747968	0.0771812	0.083173	0.0793926	0.0722556	0.074847	0.0645841	0.0776602	0.0652903	0.065349	0.0652627	0.0783522	0.0688322	0.00951998	Up	0.013965	NC	No	No	No	No
Rnf167	0.085906	0.0933348	0.100612	0.0837013	0.0893264	0.0867548	0.0716241	0.0824918	0.0899867	0.0807068	0.0798302	0.0778527	0.0899392	0.0804154	0.00952378	Up	0.001485	Up	No	No	No	No
Coa3	0.100731	0.118554	0.121232	0.0837482	0.126045	0.111004	0.0877031	0.103796	0.115416	0.0859521	0.11232	0.098792	0.110219	0.100663	0.00955562	Up	0.01617	NC	No	No	No	No
Copg1	0.123609	0.140683	0.146089	0.127203	0.120162	0.116079	0.103757	0.129423	0.144022	0.121187	0.108336	0.109627	0.128971	0.119392	0.00957881	Up	0.012846	NC	No	No	No	No
Cacna1a	0.136701	0.121795	0.120532	0.0913376	0.1221	0.132008	0.128966	0.101	0.124563	0.0845762	0.108326	0.119323	0.120746	0.111126	0.00961994	Up	0.037194	Up	Yes	Yes	No	No
Sorbs2	0.132367	0.132673	0.130802	0.125307	0.160539	0.153002	0.107356	0.126279	0.128556	0.123132	0.150335	0.141254	0.139115	0.129485	0.00962934	Up	0.039258	NC	Yes	Yes	No	No
Gstm1	0.0756728	0.0602436	0.0515234	0.0871484	0.0828773	0.0777501	0.065026	0.0441022	0.0424518	0.081752	0.0704798	0.0735867	0.0725359	0.0628997	0.00963619	Up	0.003196	NC	No	No	No	No
Zfhx2	0.117436	0.132281	0.13195	0.109157	0.138148	0.133071	0.101858	0.109242	0.119294	0.106313	0.135858	0.131642	0.127007	0.117368	0.00963938	Up	0.04444	NC	No	No	Yes	Yes
Atp6v0a1	0.112574	0.107457	0.135963	0.112331	0.125499	0.122786	0.100143	0.10417	0.118835	0.0974467	0.11036	0.127795	0.119435	0.109792	0.00964356	Up	0.041679	NC	Yes	Yes	No	No
Cep170b	0.0888887	0.09272	0.0928842	0.092878	0.0989101	0.0936598	0.0730156	0.0759677	0.0780023	0.0830458	0.0988363	0.0931283	0.0933235	0.083666	0.00965747	Up	0.026894	NC	No	No	No	No
Cadps2	0.102522	0.097909	0.111127	0.0846028	0.0773337	0.0837422	0.091187	0.0851302	0.0955214	0.0802155	0.0672582	0.079964	0.0928729	0.0832127	0.00966016	Up	0.003985	NC	No	No	No	No
Pcdh15	0.0675154	0.0755716	0.054951	0.0526372	0.072778	0.0722505	0.0533342	0.0669201	0.0476586	0.0395162	0.0644277	0.0657762	0.0659506	0.0562722	0.00967847	Up	0.000696	NC	No	Yes	Yes	No
Arc	0.0349895	0.0502009	0.0371944	0.0402983	0.0339544	0.0639011	0.0248471	0.0424777	0.0382165	0.0289465	0.0257003	0.042269	0.0434231	0.0337428	0.00968025	Up	0.022712	NC	No	No	No	No
Rnf216	0.120064	0.115106	0.124977	0.0912983	0.0669156	0.0725644	0.102391	0.107988	0.114222	0.0847927	0.0567504	0.0666594	0.0984877	0.0888005	0.00968716	Up	0.002918	NC	Yes	Yes	Yes	No
Atp5e	0.165401	0.20136	0.21636	0.137234	0.152208	0.170823	0.151562	0.193043	0.192556	0.13831	0.149256	0.160485	0.173898	0.164202	0.00969568	Up	0.04157	NC	No	No	No	No
Midn	0.0343505	0.0657716	0.0737438	0.042429	0.0422684	0.052807	0.030541	0.0513643	0.0593599	0.0358768	0.0330148	0.0429387	0.0518951	0.0421826	0.00971247	Up	0.00243	NC	No	No	No	No
Rangap1	0.116499	0.0984927	0.104734	0.105755	0.117117	0.115591	0.106402	0.0778328	0.10583	0.0933389	0.111063	0.105353	0.109698	0.0999701	0.00972804	Up	0.02104	NC	No	No	No	No
Cmas	0.0955114	0.108595	0.125384	0.0958813	0.109136	0.104266	0.0790727	0.0936814	0.118844	0.0988287	0.100979	0.0889071	0.106462	0.0967188	0.00974355	Up	0.023813	NC	Yes	No	No	No
Suclg1	0.125371	0.116609	0.132714	0.154933	0.130947	0.138217	0.114172	0.108123	0.133814	0.145475	0.119237	0.119287	0.133132	0.123351	0.00978056	Up	0.013998	NC	No	No	No	No
Ccdc42	0.0684294	0.0640214	0.0659045	0.0620035	0.0503372	0.049686	0.0610182	0.0451053	0.0515101	0.0557136	0.0433836	0.0448633	0.0600637	0.0502657	0.00979798	Up	0.007652	NC	No	No	No	No
Sec62	0.16644	0.169822	0.160912	0.164304	0.179366	0.167906	0.15277	0.158201	0.154947	0.158507	0.167724	0.15768	0.168125	0.158305	0.00982049	Up	0.000702	NC	No	No	No	No
March6	0.0956151	0.0966244	0.0989543	0.0859442	0.114955	0.102344	0.0799019	0.0834658	0.0901311	0.0887895	0.103112	0.0899557	0.0990727	0.089226	0.00984663	Up	0.014699	NC	No	No	No	No
Pdx1	0.162828	0.140829	0.159412	0.155998	0.182014	0.177604	0.154386	0.136268	0.154445	0.136703	0.175682	0.162118	0.163114	0.153267	0.0098472	Up	0.010932	NC	Yes	Yes	No	No
Pja2	0.10265	0.114146	0.115989	0.106041	0.124099	0.109771	0.0854294	0.0991119	0.099129	0.0921158	0.124852	0.112885	0.112116	0.102254	0.00986219	Up	0.047512	NC	Yes	Yes	Yes	Yes
Stxbp1	0.208291	0.19056	0.183108	0.213106	0.227511	0.236264	0.213529	0.176952	0.174062	0.190906	0.215208	0.228998	0.209807	0.199942	0.00986428	Up	0.04403	NC	No	Yes	No	No
Nup93	0.0859294	0.0688411	0.0722888	0.066007	0.0718026	0.0654306	0.0716026	0.0582564	0.0693409	0.0558056	0.0590221	0.0570308	0.0717166	0.0618431	0.00987351	Up	0.001735	NC	No	Yes	No	Yes
Pnrc1	0.175509	0.183945	0.173206	0.159665	0.172594	0.145731	0.173495	0.161161	0.169145	0.149812	0.161996	0.135761	0.168442	0.158562	0.00987992	Up	0.02059	NC	No	No	Yes	No
Gpr45	0.0969098	0.100087	0.109902	0.0874437	0.088597	0.0900013	0.0871651	0.0841843	0.11321	0.0693749	0.0776751	0.0820496	0.09549	0.0856098	0.00988023	Up	0.02341	NC	No	No	No	No
Map2k2	0.144495	0.129404	0.142473	0.135315	0.124529	0.14589	0.135141	0.109495	0.141956	0.13002	0.118616	0.127519	0.137018	0.127125	0.00989302	Up	0.025601	NC	No	No	No	Yes
Ift57	0.0727625	0.08394	0.0909546	0.0629114	0.0592474	0.0537492	0.0591874	0.0609636	0.0781298	0.0596676	0.0550581	0.0511045	0.0705942	0.0606852	0.00990901	Up	0.029365	NC	No	No	No	Yes
Prkce	0.116645	0.108194	0.108537	0.107406	0.137296	0.126835	0.102484	0.0961893	0.106465	0.10286	0.12286	0.114556	0.117486	0.107569	0.00991657	Up	0.005783	NC	Yes	No	No	No
Lbp	0.092107	0.0491084	0.0554539	0.0520719	0.0434492	0.0652199	0.0814491	0.0423532	0.0391632	0.0367705	0.0388842	0.0589178	0.0595684	0.0495896	0.00997873	Up	0.004281	NC	No	No	No	No
[truncated: 437 more rows]

## Sheet: Table S5
P2 DMR-assocaited genes with lower methylation in eYFP cells				P2 DMR-assocaited genes with higher methylation in eYFP cells				genes with both lower and higher methylation in DMRs
[truncated: 2,187 more rows]

[truncated: 2 more sheets: Table S6, Table S7]
